# Supplementary material for: Calcium-binding proteins are altered in the cerebellum in schizophrenia
Source: PLoS One. 2020 Jul 8;15(7):e0230400. doi: 10.1371/journal.pone.0230400 (PMC7343173; doi:10.1371/journal.pone.0230400)
Supplement: S1 Dataset — (Probability >90%). (XLSX) [file pone.0230400.s006.xlsx]

## Sheet: ProteinFiltrated
Supplementary data 1. List of reliably quantified proteins in the cerebellum in schizophrenia. (Probability >90%)
Uniprot Access	Gene Symbol	Protein Description	q_peptide_number	Spectral_Counts	Ratio H/L	Log2Ratio H/L	Normalized Ratio H/L	Normalized_Log2Ratio H/L	z score	Significance	FDR-significance thresholds		FDR-adjusted p-values ( q-values)	Probability	Coverage	Indistinguible Proteins	Biological Process (GO)
Q96T58	SPEN	Msx2-interacting protein (SMART/HDAC1-associated repressor protein) (SPEN homolog)	2	4	0.00847231	-6.88303	0.00781912	-6.99878	-13.3365	0	7.08215e-05	*	0	0.9998	0.709607	null	Regulation of nucleobase, nucleoside, nucleotide and nucleic acid metabolism (GO:0019219)
Q05BV3	EML5	Echinoderm microtubule-associated protein-like 5 (EMAP-5)	2	2	0.00958765	-6.70461	0.00884847	-6.82036	-12.9982	0	0.000141643	*	0	0.9959	0.964957	null	Cell growth and/or maintenance (GO:0008151)
G3V2G8	GABRA5	Gamma-aminobutyric acid receptor subunit alpha-5 (Fragment)	1	1	0.0326241	-4.93792	0.0301089	-5.05367	-9.64802	0	0.000212465	*	0	0.9282	6.62651	G3V2K2 P31644	Transport (GO:0006810)
G3V364	LRFN5	Leucine-rich repeat and fibronectin type-III domain-containing protein 5	2	2	0.0418435	-4.57885	0.0386174	-4.6946	-8.96713	0	0.000283286	*	0	0.9985	5.5794	G3V4N1 Q96NI6	Biological_process unknown (GO:0000004)
Q9NYQ7	CELSR3	Cadherin EGF LAG seven-pass G-type receptor 3 (Cadherin family member 11) (Epidermal growth factor-like protein 1) (EGF-like protein 1) (Flamingo homolog 1) (hFmi1) (Multiple epidermal growth factor-like domains protein 2) (Multiple EGF-like domains prote	2	2	0.0659571	-3.92233	0.0608719	-4.03808	-7.72217	0	0.000354108	*	0	0.9894	0.634058	null	Cell communication (GO:0007154); Signal transduction (GO:0007165)
E9PCX7	NNT	NAD(P) transhydrogenase, mitochondrial	5	6	0.0731181	-3.77363	0.0674809	-3.88938	-7.44019	0	0.000424929	*	0	1	5.02618	Q13423	Energy pathways (GO:0006091)
P16615	ATP2A2	Sarcoplasmic/endoplasmic reticulum calcium ATPase 2 (SERCA2) (SR Ca(2+)-ATPase 2) (EC 3.6.3.8) (Calcium pump 2) (Calcium-transporting ATPase sarcoplasmic reticulum type, slow twitch skeletal muscle isoform) (Endoplasmic reticulum class 1/2 Ca(2+) ATPase)	2	2	0.0807802	-3.62985	0.0745523	-3.7456	-7.16756	0	0.000495751	*	0	0.9974	3.16699	null	Transport (GO:0006810)
Q93050	ATP6V0A1	V-type proton ATPase 116 kDa subunit a isoform 1 (V-ATPase 116 kDa isoform a1) (Clathrin-coated vesicle/synaptic vesicle proton pump 116 kDa subunit) (Vacuolar adenosine triphosphatase subunit Ac116) (Vacuolar proton pump subunit 1) (Vacuolar proton trans	5	8	0.0981418	-3.34899	0.0905753	-3.46474	-6.63496	0	0.000566572	*	0	1	6.69056	null	Transport (GO:0006810)
A0A096LP55	UQCRHL	Cytochrome b-c1 complex subunit 6-like, mitochondrial	5	12	0.117559	-3.08854	0.108495	-3.20429	-6.14108	0	0.000637394	*	0	1	63.7363	null	Biological_process unknown (GO:0000004)
A0A0A0MR02	VDAC2	Voltage-dependent anion-selective channel protein 2 (Fragment)	16	42	0.138311	-2.85401	0.127648	-2.96976	-5.69633	7.77156e-16	0.0016289	*	4.77106e-14	1	35.461	P45880	Transport (GO:0006810)
P37802	TAGLN2	Transgelin-2 (Epididymis tissue protein Li 7e) (SM22-alpha homolog)	9	16	0.143861	-2.79725	0.13277	-2.913	-5.5887	2.66454e-15	0.00177054	*	1.50493e-13	1	25.6281	null	Biological_process unknown (GO:0000004)
H7C4H2	SRPRB	Signal recognition particle receptor subunit beta (Fragment)	1	2	0.182528	-2.45381	0.168455	-2.56956	-4.93745	2.89757e-12	0.00205382	*	1.41082e-10	0.9704	12.5	Q9Y5M8	Protein metabolism (GO:0019538)
P14923	JUP	Junction plakoglobin (Catenin gamma) (Desmoplakin III) (Desmoplakin-3)	2	3	0.211783	-2.23934	0.195455	-2.35509	-4.53075	1.47979e-10	0.0026204	*	5.6472e-09	0.9915	4.42953	null	Cell communication (GO:0007154); Signal transduction (GO:0007165)
C9J2Y4	FAM136A	Protein FAM136A	1	1	0.224421	-2.15572	0.207118	-2.27147	-4.37219	6.28137e-10	0.00283286	*	2.21732e-08	0.9424	9.52381	E7EQY1 Q96C01	Regulation of nucleobase, nucleoside, nucleotide and nucleic acid metabolism (GO:0019219)
P13796	LCP1	Plastin-2 (L-plastin) (LC64P) (Lymphocyte cytosolic protein 1) (LCP-1)	2	2	0.235824	-2.08422	0.217642	-2.19997	-4.23659	2.07984e-09	0.00304533	*	6.8296e-08	0.9998	6.2201	null	Cell communication (GO:0007154); Signal transduction (GO:0007165)
Q08495	DMTN	Dematin (Dematin actin-binding protein) (Erythrocyte membrane protein band 4.9)	8	16	0.252416	-1.98612	0.232955	-2.10187	-4.05058	1.01393e-08	0.00318697	*	3.18149e-07	1	17.037	null	Cell growth and/or maintenance (GO:0008151)
E7EPJ7	TRIO	Triple functional domain protein (Fragment)	1	1	0.269796	-1.89006	0.248996	-2.00581	-3.86841	4.48121e-08	0.00354108	*	1.26549e-06	0.9716	0.981932	E7EWP2 O75962	Cell communication (GO:0007154); Signal transduction (GO:0007165)
A0A1B0GUU9	IGHM	Immunoglobulin heavy constant mu (Fragment)	2	4	0.279873	-1.83716	0.258295	-1.95291	-3.76809	9.88152e-08	0.00368272	*	2.68321e-06	1	3.37553	P01871	Immune response (GO:0006955)
P10155	TROVE2	60 kDa SS-A/Ro ribonucleoprotein (60 kDa Ro protein) (60 kDa ribonucleoprotein Ro) (RoRNP) (Ro 60 kDa autoantigen) (Sjoegren syndrome antigen A2) (Sjoegren syndrome type A antigen) (SS-A) (TROVE domain family member 2)	1	1	0.294255	-1.76486	0.271569	-1.88061	-3.631	2.82134e-07	0.00396601	*	7.1138e-06	0.9534	2.04461	null	Regulation of nucleobase, nucleoside, nucleotide and nucleic acid metabolism (GO:0019219)
A0A087WTL4	BCL2L13	Bcl-2-like protein 13	1	2	0.305649	-1.71005	0.282084	-1.8258	-3.52707	6.09988e-07	0.00403683	*	1.51106e-05	0.9708	5.63991	A0A087WX97 Q9BXK5	Apoptosis (GO:0006915)
Q12772	SREBF2	Sterol regulatory element-binding protein 2 (SREBP-2) (Class D basic helix-loop-helix protein 2) (bHLHd2) (Sterol regulatory element-binding transcription factor 2) [Cleaved into: Processed sterol regulatory element-binding protein 2]	2	2	0.325515	-1.6192	0.300419	-1.73495	-3.35479	2.09133e-06	0.00432011	*	4.84092e-05	0.9968	1.40228	null	Regulation of nucleobase, nucleoside, nucleotide and nucleic acid metabolism (GO:0019219)
G1AUC5	PPP1R2P3	Protein phosphatase inhibitor 2-like protein (Protein phosphatase inhibitor 2-like protein 3)	4	7	0.341736	-1.54905	0.315389	-1.6648	-3.22175	5.20761e-06	0.00446176	*	0.000116717	1	16.5854	P41236 Q6NXS1	Cell communication (GO:0007154); Signal transduction (GO:0007165)
F8WAM2	CCT7	T-complex protein 1 subunit eta (Fragment)	2	4	0.354017	-1.49811	0.326723	-1.61386	-3.12516	9.88636e-06	0.00474504	*	0.000208351	1	19.3878	Q99832	Protein folding (GO:0006457)
P40227	CCT6A	T-complex protein 1 subunit zeta (TCP-1-zeta) (Acute morphine dependence-related protein 2) (CCT-zeta-1) (HTR3) (Tcp20)	3	4	0.366507	-1.44809	0.33825	-1.56384	-3.03031	1.82326e-05	0.00495751	*	0.000367778	1	9.03955	null	Protein metabolism (GO:0019538)
K7N7A8		Uncharacterized protein (Fragment)	2	3	0.373892	-1.41931	0.345066	-1.53506	-2.97573	2.57284e-05	0.00509915	*	0.000504562	1	5.79065	P29972	transport [GO:0006810]
F5GYQ1	ATP6V0D1	V-type proton ATPase subunit	2	3	0.384108	-1.38042	0.354494	-1.49617	-2.90198	4.06021e-05	0.00531161	*	0.000764402	1	7.39796	J3QL14 P61421 R4GN72	Transport (GO:0006810)
P06727	APOA4	Apolipoprotein A-IV (Apo-AIV) (ApoA-IV) (Apolipoprotein A4)	1	2	0.39724	-1.33192	0.366614	-1.44767	-2.81001	7.06875e-05	0.00552408	*	0.00127963	0.97	4.54545	null	Transport (GO:0006810)
Q7LBR1	CHMP1B	Charged multivesicular body protein 1b (CHMP1.5) (Chromatin-modifying protein 1b) (CHMP1b) (Vacuolar protein sorting-associated protein 46-2) (Vps46-2) (hVps46-2)	2	3	0.414059	-1.27209	0.382136	-1.38784	-2.69657	0.000136999	0.00580737	*	0.00235906	0.9992	8.0402	null	Transport (GO:0006810)
O14495	PLPP3	Phospholipid phosphatase 3 (EC 3.1.3.4) (Lipid phosphate phosphohydrolase 3) (PAP2-beta) (Phosphatidate phosphohydrolase type 2b) (Phosphatidic acid phosphatase 2b) (PAP-2b) (PAP2b) (Vascular endothelial growth factor and type I collagen-inducible protein	3	7	0.414485	-1.27061	0.382529	-1.38636	-2.69376	0.000139221	0.00587819	*	0.00236844	1	11.8971	null	Lipid metabolism (GO:0006629)
E2QRG1	PLD3	Phospholipase D3 (Fragment)	2	2	0.424881	-1.23487	0.392124	-1.35062	-2.62599	0.000204248	0.00601983	*	0.00339291	1	4.51977	M0R1F7 M0R2W7 Q8IV08	Metabolism (GO:0008152); Energy pathways (GO:0006091)
P00387	CYB5R3	NADH-cytochrome b5 reductase 3 (B5R) (Cytochrome b5 reductase) (EC 1.6.2.2) (Diaphorase-1) [Cleaved into: NADH-cytochrome b5 reductase 3 membrane-bound form; NADH-cytochrome b5 reductase 3 soluble form]	2	3	0.43144	-1.21277	0.398177	-1.32852	-2.58407	0.000257752	0.00616147	*	0.00418329	1	10.299	null	Metabolism (GO:0008152); Energy pathways (GO:0006091)
P50135	HNMT	Histamine N-methyltransferase (HMT) (EC 2.1.1.8)	2	4	0.445412	-1.16679	0.411072	-1.28254	-2.49688	0.000413796	0.00644476	*	0.00635926	1	8.21918	null	Amino acid and derivative metabolism (GO:0006519)
Q9UIJ7	AK3	GTP:AMP phosphotransferase AK3, mitochondrial (EC 2.7.4.10) (Adenylate kinase 3) (AK 3) (Adenylate kinase 3 alpha-like 1)	2	3	0.445452	-1.16666	0.411109	-1.28241	-2.49664	0.000414343	0.00651558	*	0.00635926	0.9998	11.4537	null	Metabolism (GO:0008152); Energy pathways (GO:0006091)
Q9Y608	LRRFIP2	Leucine-rich repeat flightless-interacting protein 2 (LRR FLII-interacting protein 2)	3	4	0.455453	-1.13463	0.420339	-1.25038	-2.43589	0.000571324	0.00679887	*	0.00840323	1	4.85437	null	Biological_process unknown (GO:0000004)
O95168	NDUFB4	NADH dehydrogenase [ubiquinone] 1 beta subcomplex subunit 4 (Complex I-B15) (CI-B15) (NADH-ubiquinone oxidoreductase B15 subunit)	1	2	0.468769	-1.09305	0.432628	-1.2088	-2.35706	0.000857973	0.00708215	*	0.0120252	0.9376	7.75194	null	Metabolism (GO:0008152); Energy pathways (GO:0006091)
Q8TAS1	UHMK1	Serine/threonine-protein kinase Kist (EC 2.7.11.1) (Kinase interacting with stathmin) (PAM COOH-terminal interactor protein 2) (P-CIP2) (U2AF homology motif kinase 1)	1	1	0.482568	-1.0512	0.445363	-1.16695	-2.27769	0.00127683	0.00736544	*	0.0173355	0.9114	4.77327	null	Regulation of nucleobase, nucleoside, nucleotide and nucleic acid metabolism (GO:0019219)
G3V5M2	PNP	Purine nucleoside phosphorylase (Fragment)	2	3	0.487233	-1.03732	0.449669	-1.15307	-2.25137	0.00145298	0.00750708	*	0.0193548	1	6.33484	P00491	Metabolism (GO:0008152); Energy pathways (GO:0006091)
P02787	TF	Serotransferrin (Transferrin) (Beta-1 metal-binding globulin) (Siderophilin)	4	6	0.487924	-1.03527	0.450307	-1.15102	-2.24749	0.00148075	0.0075779	*	0.0195404	1	5.58739	null	Transport (GO:0006810)
Q7L1I2	SV2B	Synaptic vesicle glycoprotein 2B	2	7	0.497607	-1.00692	0.459242	-1.12267	-2.19373	0.00191954	0.00764873	*	0.0250962	1	5.7101	null	Transport (GO:0006810)
Q86UR5	RIMS1	Regulating synaptic membrane exocytosis protein 1 (Rab-3-interacting molecule 1) (RIM 1) (Rab-3-interacting protein 2)	11	13	0.499372	-1.00181	0.460872	-1.11756	-2.18404	0.00201034	0.00779037	*	0.0258054	1	7.62411	null	Transport (GO:0006810)
K7EID3	PRKAR1A	cAMP-dependent protein kinase type I-alpha regulatory subunit (Fragment)	2	4	0.501855	-0.994659	0.463163	-1.11041	-2.17048	0.00214404	0.00800283	*	0.0267911	0.9999	10.7784	K7EIE5 K7EJ40 K7EK41 K7EMU2 K7EMZ6 K7EPB2 P10644	Cell communication (GO:0007154); Signal transduction (GO:0007165)
D6RCK3	MOB1B	MOB kinase activator 1B (Fragment)	2	3	0.507209	-0.979349	0.468104	-1.0951	-2.14144	0.00245804	0.00814448	*	0.0301804	1	9.23077	Q7L9L4 Q9H8S9
A0A087X0R6	SNX12	Sorting nexin-12	4	5	0.507668	-0.978044	0.468528	-1.09379	-2.13897	0.00248665	0.0082153	*	0.0302685	1	21.5116	Q9UMY4	Protein metabolism (GO:0019538)
O00154	ACOT7	Cytosolic acyl coenzyme A thioester hydrolase (EC 3.1.2.2) (Acyl-CoA thioesterase 7) (Brain acyl-CoA hydrolase) (BACH) (CTE-IIa) (CTE-II) (Long chain acyl-CoA thioester hydrolase)	3	6	0.50832	-0.976191	0.46913	-1.09194	-2.13546	0.0025278	0.00828612	*	0.0305065	1	8.42105	null	Lipid metabolism (GO:0006629)
P15954	COX7C	Cytochrome c oxidase subunit 7C, mitochondrial (Cytochrome c oxidase polypeptide VIIc)	4	8	0.514005	-0.960146	0.474376	-1.0759	-2.10503	0.00291118	0.00842776	*	0.0345428	1	38.0952	null	Metabolism (GO:0008152); Energy pathways (GO:0006091)
J3KPX7	PHB2	Prohibitin-2	2	2	0.519415	-0.94504	0.47937	-1.06079	-2.07638	0.0033199	0.00849858	*	0.0390642	0.9997	6.71141	Q99623	Regulation of nucleobase, nucleoside, nucleotide and nucleic acid metabolism (GO:0019219)
A0A0C4DGY8	ENOPH1	Enolase-phosphatase E1	1	3	0.520829	-0.941118	0.480675	-1.05687	-2.06895	0.00343423	0.00864023	*	0.0396227	0.9457	14.7651	D6RA00 Q9UHY7	Biological_process unknown (GO:0000004)
Q9P265	DIP2B	Disco-interacting protein 2 homolog B (DIP2 homolog B)	3	3	0.526793	-0.924692	0.486179	-1.04044	-2.0378	0.00395305	0.00885269	*	0.0446537	1	2.60152	null	Biological_process unknown (GO:0000004)
C9J8D4	MOGS	Mannosyl-oligosaccharide glucosidase (Fragment)	1	2	0.530147	-0.915534	0.489274	-1.03128	-2.02043	0.00427227	0.00906516	*	0.0471284	0.9702	4.07332	Q13724	Metabolism (GO:0008152); Energy pathways (GO:0006091)
B4DEB1	H3F3A	Histone H3	2	3	0.536096	-0.899435	0.494765	-1.01519	-1.98991	0.0048906	0.0092068	*	0.0531194	0.9985	14.6341	K7EK07 K7EMV3 K7ES00 P68431 P84243 Q16695 Q71DI3	Regulation of nucleobase, nucleoside, nucleotide and nucleic acid metabolism (GO:0019219)
E5RFZ4	PLPBP	Pyridoxal phosphate-binding protein	1	3	0.539301	-0.890839	0.497722	-1.00659	-1.9736	0.00525295	0.00927762	*	0.0566196	1	21.6216	E5RG77 O94903	Metabolism (GO:0008152); Energy pathways (GO:0006091)
P0DOY2	IGLC2	Immunoglobulin lambda constant 2 (Ig lambda chain C region Kern) (Ig lambda chain C region NIG-64) (Ig lambda chain C region SH) (Ig lambda chain C region X) (Ig lambda-2 chain C region)	3	4	0.545308	-0.874858	0.503266	-0.990608	-1.9433	0.00599158	0.00941926	*	0.0636099	1	16.0377	P0DOY3	Immune response (GO:0006955)
B0QYN7	UBE2I	SUMO-conjugating enzyme (EC 2.3.2.-)	2	3	0.546646	-0.871322	0.504501	-0.987072	-1.93659	0.00616716	0.00949008	*	0.0649853	0.9995	7.06522	H3BPC4 H3BQQ9 P63279	Protein metabolism (GO:0019538)
K4DI93	CUL4B	Cullin 4B, isoform CRA_e (Cullin-4B)	2	2	0.549186	-0.864633	0.506845	-0.980383	-1.92391	0.00651198	0.00963173	*	0.0676096	1	2.77778	Q13620	Protein metabolism (GO:0019538)
A0A0A0MRT6	ABI1	Abl interactor 1	3	3	0.551421	-0.858774	0.508908	-0.974524	-1.9128	0.00682819	0.00970255	*	0.0703752	1	5.47368	B6VEX4 Q8IZP0	Regulation of cell growth (GO:0001558); Signal transduction (GO:0007165)
P10071	GLI3	Transcriptional activator GLI3 (GLI3 form of 190 kDa) (GLI3-190) (GLI3 full length protein) (GLI3FL) [Cleaved into: Transcriptional repressor GLI3R (GLI3 C-terminally truncated form) (GLI3 form of 83 kDa) (GLI3-83)]	2	2	0.554527	-0.85067	0.511774	-0.96642	-1.89743	0.00728828	0.00991501	*	0.0735075	0.9941	1.89873	null	Regulation of nucleobase, nucleoside, nucleotide and nucleic acid metabolism (GO:0019219)
P22059	OSBP	Oxysterol-binding protein 1	1	1	0.563609	-0.827233	0.520156	-0.942983	-1.85299	0.0087795	0.0101275	*	0.0866899	0.9296	2.23048	null	Transport (GO:0006810)
B5MDF5	RAN	GTP-binding nuclear protein Ran	7	13	0.566458	-0.819959	0.522785	-0.935709	-1.8392	0.00929477	0.0101983	*	0.0905117	1	29.1845	J3KQE5 P62826	Cell communication (GO:0007154); Signal transduction (GO:0007165)
A0A087X253	AP2B1	AP complex subunit beta	5	7	0.566621	-0.819545	0.522935	-0.935295	-1.83841	0.00932489	0.0102691	*	0.0905117	1	5.80504	P63010	Biological_process unknown (GO:0000004)
Q92506	HSD17B8	Estradiol 17-beta-dehydrogenase 8 (EC 1.1.1.62) (17-beta-hydroxysteroid dehydrogenase 8) (17-beta-HSD 8) (3-ketoacyl-[acyl-carrier-protein] reductase alpha subunit) (KAR alpha subunit) (3-oxoacyl-[acyl-carrier-protein] reductase) (EC 1.1.1.-) (Protein Ke6	1	2	0.568138	-0.815686	0.524336	-0.931436	-1.83109	0.00960993	0.0104108	*	0.0923076	0.9631	4.5977	null	Metabolism (GO:0008152); Energy pathways (GO:0006091)
B4DLR8	NQO1	NAD(P)H dehydrogenase [quinone] 1 (cDNA FLJ50573, highly similar to Homo sapiens NAD(P)H dehydrogenase, quinone 1 (NQO1), transcript variant 3, mRNA)	1	1	0.573354	-0.802503	0.529149	-0.918253	-1.8061	0.0106431	0.0106232		0.100128	0.9586	5.44555	H3BNV2 P15559	Synaptic transmission (GO:0007268); Xenobiotic metabolism (GO:0006805)
A8MVX0	ARHGEF33	Rho guanine nucleotide exchange factor 33	3	5	0.574485	-0.799658	0.530194	-0.915408	-1.8007	0.0108786	0.0107649		0.10101	1	4.85782	null	Cell communication (GO:0007154); Signal transduction (GO:0007165)
P49903	SEPHS1	Selenide, water dikinase 1 (EC 2.7.9.3) (Selenium donor protein 1) (Selenophosphate synthase 1)	1	1	0.57514	-0.798016	0.530798	-0.913766	-1.79759	0.0110166	0.0109065		0.10101	0.924	3.82653	null	Metabolism (GO:0008152); Energy pathways (GO:0006091)
Q9NYQ8	FAT2	Protocadherin Fat 2 (hFat2) (Cadherin family member 8) (Multiple epidermal growth factor-like domains protein 1) (Multiple EGF-like domains protein 1)	2	4	0.576501	-0.794605	0.532054	-0.910355	-1.79112	0.0113083	0.0110482		0.101892	1	0.551851	null	Cell communication (GO:0007154); Signal transduction (GO:0007165)
Q07065	CKAP4	Cytoskeleton-associated protein 4 (63-kDa cytoskeleton-linking membrane protein) (Climp-63) (p63)	1	1	0.577166	-0.792943	0.532668	-0.908693	-1.78797	0.011453	0.0111898		0.102352	0.9705	2.99003	null	Cell growth and/or maintenance (GO:0008151)
F5GX14	MLEC	Malectin	2	2	0.58213	-0.780588	0.537249	-0.896338	-1.76454	0.0125804	0.0116856		0.107563	1	11.5207	F5H1S8 Q14165	Biological_process unknown (GO:0000004)
P14678	SNRPB	Small nuclear ribonucleoprotein-associated proteins B and B' (snRNP-B) (Sm protein B/B') (Sm-B/B') (SmB/B')	4	6	0.582406	-0.779904	0.537504	-0.895654	-1.76324	0.0126455	0.0117564		0.107563	1	25.4167	null	Regulation of nucleobase, nucleoside, nucleotide and nucleic acid metabolism (GO:0019219)
D6RAL0	ABLIM2	Actin-binding LIM protein 2 (Fragment)	2	4	0.583888	-0.776235	0.538872	-0.891985	-1.75628	0.0130003	0.0118272		0.109919	1	7.86885	F5GYR0 Q6H8Q1	Cytoskeleton organization and biogenesis (GO:0007010); Cell growth and/or maintenance (GO:0008151)
P54577	YARS	Tyrosine--tRNA ligase, cytoplasmic (EC 6.1.1.1) (Tyrosyl-tRNA synthetase) (TyrRS) [Cleaved into: Tyrosine--tRNA ligase, cytoplasmic, N-terminally processed]	3	3	0.591543	-0.757444	0.545937	-0.873194	-1.72065	0.0149591	0.0121105		0.123509	1	12.1212	null	Metabolism (GO:0008152); Energy pathways (GO:0006091)
Q9HB71	CACYBP	Calcyclin-binding protein (CacyBP) (hCacyBP) (S100A6-binding protein) (Siah-interacting protein)	4	9	0.59186	-0.756671	0.546229	-0.872421	-1.71918	0.015045	0.0121813		0.123509	1	17.1053	null	Protein metabolism (GO:0019538)
A6NNK5	TP53BP1	TP53-binding protein 1	2	3	0.592885	-0.754176	0.547175	-0.869926	-1.71445	0.0153252	0.0122521		0.125082	0.9997	0.674624	C9JXV0 Q12888	Regulation of nucleobase, nucleoside, nucleotide and nucleic acid metabolism (GO:0019219)
Q96IX5	USMG5	Up-regulated during skeletal muscle growth protein 5 (Diabetes-associated protein in insulin-sensitive tissues) (HCV F-transactivated protein 2)	2	3	0.595947	-0.746745	0.550001	-0.862495	-1.70036	0.0161869	0.0123229		0.130626	0.9999	27.5862	null	Biological_process unknown (GO:0000004)
Q8NBS9	TXNDC5	Thioredoxin domain-containing protein 5 (Endoplasmic reticulum resident protein 46) (ER protein 46) (ERp46) (Thioredoxin-like protein p46)	1	1	0.595956	-0.746722	0.550009	-0.862472	-1.70032	0.0161895	0.0123938		0.130626	0.9668	2.08333	null	Protein metabolism (GO:0019538)
E7EMK3	FLOT2	Flotillin-2	1	1	0.608547	-0.716559	0.56163	-0.832309	-1.64312	0.0201404	0.0127479		0.15713	0.917	2.27743	J3QLD9 K7EKW9 Q14254	Cell communication (GO:0007154); Signal transduction (GO:0007165)
E7ERK3	CACNA2D1	Voltage-dependent calcium channel subunit alpha-2/delta-1	1	1	0.608552	-0.716547	0.561634	-0.832297	-1.6431	0.020142	0.0128187		0.15713	0.9318	4.20712	P54289	Transport (GO:0006810)
Q9BWD1	ACAT2	Acetyl-CoA acetyltransferase, cytosolic (EC 2.3.1.9) (Acetyl-CoA transferase-like protein) (Cytosolic acetoacetyl-CoA thiolase)	3	5	0.60914	-0.715155	0.562177	-0.830905	-1.64046	0.0203431	0.0128895		0.15744	1	8.56423	null	Metabolism (GO:0008152); Energy pathways (GO:0006091)
P25054	APC	Adenomatous polyposis coli protein (Protein APC) (Deleted in polyposis 2.5)	3	4	0.609642	-0.713966	0.56264	-0.829716	-1.6382	0.0205163	0.0130312		0.15744	1	1.19592	null	Cell communication (GO:0007154); Signal transduction (GO:0007165)
Q9BQI5	SGIP1	SH3-containing GRB2-like protein 3-interacting protein 1 (Endophilin-3-interacting protein)	4	6	0.611515	-0.709539	0.564369	-0.825289	-1.62981	0.0211723	0.013102		0.161596	1	5.67633	null	Biological_process unknown (GO:0000004)
Q9P2R7	SUCLA2	Succinate--CoA ligase [ADP-forming] subunit beta, mitochondrial (EC 6.2.1.5) (ATP-specific succinyl-CoA synthetase subunit beta) (A-SCS) (Succinyl-CoA synthetase beta-A chain) (SCS-betaA)	3	4	0.614867	-0.701653	0.567463	-0.817403	-1.61485	0.0223863	0.0132436		0.169034	1	5.61555	null	Metabolism (GO:0008152); Energy pathways (GO:0006091)
P21796	VDAC1	Voltage-dependent anion-selective channel protein 1 (VDAC-1) (hVDAC1) (Outer mitochondrial membrane protein porin 1) (Plasmalemmal porin) (Porin 31HL) (Porin 31HM)	30	65	0.616443	-0.69796	0.568917	-0.81371	-1.60785	0.0229753	0.0133853		0.171646	1	67.4912	null	Transport (GO:0006810)
P61204	ARF3	ADP-ribosylation factor 3	3	6	0.620002	-0.689655	0.572202	-0.805405	-1.5921	0.0243493	0.0134561		0.180954	1	17.6796	P84077	Cell communication (GO:0007154); Signal transduction (GO:0007165)
Q9BVK6	TMED9	Transmembrane emp24 domain-containing protein 9 (GMP25) (Glycoprotein 25L2) (p24 family protein alpha-2) (p24alpha2) (p25)	2	2	0.626456	-0.674715	0.578158	-0.790465	-1.56377	0.0270007	0.013881		0.193348	0.9708	9.78723	null	Biological_process unknown (GO:0000004)
P07099	EPHX1	Epoxide hydrolase 1 (EC 3.3.2.9) (Epoxide hydratase) (Microsomal epoxide hydrolase)	2	3	0.626509	-0.674594	0.578206	-0.790344	-1.56354	0.0270231	0.0139518		0.193348	1	4.17582	null	Metabolism (GO:0008152); Energy pathways (GO:0006091)
F5GZS6	SLC3A2	4F2 cell-surface antigen heavy chain	7	11	0.628051	-0.671045	0.57963	-0.786795	-1.55681	0.0276888	0.0141643		0.195483	1	12.8548	J3KPF3 P08195	Transport (GO:0006810)
Q96HU8	DIRAS2	GTP-binding protein Di-Ras2 (Distinct subgroup of the Ras family member 2)	1	2	0.632658	-0.660503	0.583881	-0.776253	-1.53682	0.0297505	0.0145892		0.203921	0.9694	6.03015	null	Cell communication (GO:0007154); Signal transduction (GO:0007165)
A0A0G2JLG2	IQSEC3	IQ motif and SEC7 domain-containing protein 3 (Fragment)	2	4	0.633318	-0.658999	0.58449	-0.774749	-1.53397	0.0300552	0.0146601		0.204214	1	2.69749	A0A0G2JN53 Q9UPP2	Biological_process unknown (GO:0000004)
P01024	C3	Complement C3 (C3 and PZP-like alpha-2-macroglobulin domain-containing protein 1) [Cleaved into: Complement C3 beta chain; C3-beta-c (C3bc); Complement C3 alpha chain; C3a anaphylatoxin; Acylation stimulating protein (ASP) (C3adesArg); Complement C3b alph	6	8	0.634501	-0.656305	0.585583	-0.772055	-1.52886	0.0306075	0.0148725		0.205764	1	6.07336	null	Immune response (GO:0006955)
P53597	SUCLG1	Succinate--CoA ligase [ADP/GDP-forming] subunit alpha, mitochondrial (EC 6.2.1.4) (EC 6.2.1.5) (Succinyl-CoA synthetase subunit alpha) (SCS-alpha)	2	2	0.6348	-0.655626	0.585858	-0.771376	-1.52758	0.0307481	0.0149433		0.205764	1	4.33526	null	Metabolism (GO:0008152); Energy pathways (GO:0006091)
P0DJ93	SMIM13	Small integral membrane protein 13	1	2	0.635403	-0.654256	0.586415	-0.770006	-1.52498	0.0310335	0.0150142		0.206388	0.9717	32.967	null	Biological_process unknown (GO:0000004)
F5H0J3	NDUFA9	NADH dehydrogenase [ubiquinone] 1 alpha subcomplex subunit 9, mitochondrial	1	1	0.637731	-0.64898	0.588564	-0.76473	-1.51497	0.0321538	0.0152975		0.210191	0.9036	9.55882	Q16795	Metabolism (GO:0008152); Energy pathways (GO:0006091)
O95674	CDS2	Phosphatidate cytidylyltransferase 2 (EC 2.7.7.41) (CDP-DAG synthase 2) (CDP-DG synthase 2) (CDP-diacylglycerol synthase 2) (CDS 2) (CDP-diglyceride pyrophosphorylase 2) (CDP-diglyceride synthase 2) (CTP:phosphatidate cytidylyltransferase 2)	2	3	0.638952	-0.646221	0.58969	-0.761971	-1.50974	0.0327532	0.0154391		0.211285	0.9978	6.96629	null	Metabolism (GO:0008152); Energy pathways (GO:0006091)
Q16531	DDB1	DNA damage-binding protein 1 (DDB p127 subunit) (DNA damage-binding protein a) (DDBa) (Damage-specific DNA-binding protein 1) (HBV X-associated protein 1) (XAP-1) (UV-damaged DNA-binding factor) (UV-damaged DNA-binding protein 1) (UV-DDB 1) (XPE-binding f	1	2	0.639954	-0.643959	0.590615	-0.759709	-1.50545	0.0332518	0.0155807		0.212472	0.9668	1.57895	null	Regulation of nucleobase, nucleoside, nucleotide and nucleic acid metabolism (GO:0019219)
F5H6L7	SLC8A2	Sodium/calcium exchanger 2	7	10	0.641503	-0.640473	0.592044	-0.756223	-1.49884	0.034033	0.0157932		0.215492	1	11.9645	Q9UPR5	Transport (GO:0006810)
P12955	PEPD	Xaa-Pro dipeptidase (X-Pro dipeptidase) (EC 3.4.13.9) (Imidodipeptidase) (Peptidase D) (Proline dipeptidase) (Prolidase)	5	8	0.644061	-0.63473	0.594406	-0.75048	-1.48795	0.0353541	0.0159348		0.221867	1	8.11359	null	Protein metabolism (GO:0019538)
O15144	ARPC2	Actin-related protein 2/3 complex subunit 2 (Arp2/3 complex 34 kDa subunit) (p34-ARC)	2	3	0.646077	-0.630222	0.596266	-0.745971	-1.4794	0.0364217	0.0160765		0.226552	0.9999	4.66667	null	Cytoskeleton organization and biogenesis (GO:0007010)
Q96C86	DCPS	m7GpppX diphosphatase (EC 3.6.1.59) (DCS-1) (Decapping scavenger enzyme) (Hint-related 7meGMP-directed hydrolase) (Histidine triad nucleotide-binding protein 5) (Histidine triad protein member 5) (HINT-5) (Scavenger mRNA-decapping enzyme DcpS)	1	1	0.647825	-0.626324	0.597879	-0.742074	-1.47201	0.0373666	0.016289		0.229399	0.9564	3.85757	null	Metabolism (GO:0008152); Energy pathways (GO:0006091)
Q9P0J0	NDUFA13	NADH dehydrogenase [ubiquinone] 1 alpha subcomplex subunit 13 (Cell death regulatory protein GRIM-19) (Complex I-B16.6) (CI-B16.6) (Gene associated with retinoic and interferon-induced mortality 19 protein) (GRIM-19) (Gene associated with retinoic and IFN	2	2	0.649501	-0.622595	0.599426	-0.738345	-1.46494	0.03829	0.0163598		0.232972	0.998	17.3611	null	Metabolism (GO:0008152); Energy pathways (GO:0006091)
Q9P1Y5	CAMSAP3	Calmodulin-regulated spectrin-associated protein 3 (Protein Nezha)	1	2	0.649623	-0.622325	0.599539	-0.738075	-1.46443	0.0383577	0.0164306		0.232972	0.9717	1.68134	null	Biological_process unknown (GO:0000004)
Q9Y277	VDAC3	Voltage-dependent anion-selective channel protein 3 (VDAC-3) (hVDAC3) (Outer mitochondrial membrane protein porin 3)	11	18	0.649778	-0.621982	0.599681	-0.737732	-1.46378	0.0384437	0.0165014		0.232972	1	33.9223	null	Transport (GO:0006810)
Q99584	S100A13	Protein S100-A13 (S100 calcium-binding protein A13)	3	5	0.650573	-0.620217	0.600416	-0.735967	-1.46043	0.0388892	0.0165722		0.234604	1	26.5306	null	Cell communication (GO:0007154); Signal transduction (GO:0007165)
A0A024R7W5	YTHDF3	YTH domain family, member 3, isoform CRA_a (YTH domain-containing family protein 3)	1	1	0.65176	-0.617588	0.60151	-0.733338	-1.45544	0.0395605	0.0167139		0.236692	0.9608	2.62172	A0A087WY31 A0A087X0Q1 Q7Z739 Q9BYJ9	Biological_process unknown (GO:0000004)
A0A087WVA1	SELENOT	Selenoprotein T	2	2	0.652671	-0.615572	0.602352	-0.731322	-1.45162	0.040082	0.0167847		0.238801	0.9982	11.7949	P62341
C9JB30	MAPRE3	Microtubule-associated protein RP/EB family member 3 (Fragment)	5	11	0.655144	-0.610115	0.604634	-0.725865	-1.44127	0.0415231	0.0168555		0.246347	1	20.1835	Q9UPY8	Cell growth and/or maintenance (GO:0008151)
B7Z6Z4	MYL6	Myosin light polypeptide 6 (cDNA FLJ56329, highly similar to Myosin light polypeptide 6)	5	14	0.655908	-0.608435	0.605339	-0.724185	-1.43809	0.0419755	0.0169263		0.247989	1	18.4874	F8VPF3 F8W1R7 G3V1V0 G8JLA2 J3KND3 P60660	Cell growth and/or maintenance (GO:0008151)
O76080	ZFAND5	AN1-type zinc finger protein 5 (Zinc finger A20 domain-containing protein 2) (Zinc finger protein 216)	1	2	0.656834	-0.6064	0.606193	-0.72215	-1.43423	0.0425291	0.0169972		0.250213	0.9712	10.3286	Q5QPB1	Regulation of nucleobase, nucleoside, nucleotide and nucleic acid metabolism (GO:0019219)
A0A0A0MTI5	DBI	Acyl-CoA-binding protein	9	26	0.657527	-0.604877	0.606834	-0.720627	-1.43134	0.0429474	0.017068		0.251625	1	32.8671	B8ZWD1 P07108	Metabolism (GO:0008152); Energy pathways (GO:0006091)
P24539	ATP5F1	ATP synthase F(0) complex subunit B1, mitochondrial (ATP synthase proton-transporting mitochondrial F(0) complex subunit B1) (ATP synthase subunit b) (ATPase subunit b)	11	22	0.660559	-0.59824	0.609632	-0.71399	-1.41876	0.0448112	0.0172096		0.259562	1	26.9531	Q5QNZ2	Metabolism (GO:0008152); Energy pathways (GO:0006091)
A0A024R216	HDGFRP3	Hepatoma-derived growth factor, related protein 3, isoform CRA_a (Hepatoma-derived growth factor-related protein 3)	4	6	0.660965	-0.597355	0.610006	-0.713105	-1.41708	0.0450648	0.0173513		0.259721	1	14.2857	Q9Y3E1	Cell growth and/or maintenance (GO:0008151)
P26447	S100A4	Protein S100-A4 (Calvasculin) (Metastasin) (Placental calcium-binding protein) (Protein Mts1) (S100 calcium-binding protein A4)	4	6	0.661855	-0.595412	0.610828	-0.711162	-1.41339	0.0456258	0.0174221		0.261439	1	27.7228	null	Cell growth and/or maintenance (GO:0008151)
P05204	HMGN2	Non-histone chromosomal protein HMG-17 (High mobility group nucleosome-binding domain-containing protein 2)	8	15	0.662317	-0.594407	0.611254	-0.710157	-1.41149	0.0459184	0.0175637		0.261439	1	58.8889	null	Regulation of nucleobase, nucleoside, nucleotide and nucleic acid metabolism (GO:0019219)
A0A0A0MSE2	HADH	Hydroxyacyl-coenzyme A dehydrogenase, mitochondrial	3	6	0.665968	-0.586476	0.614623	-0.702226	-1.39645	0.0482825	0.0179178		0.268455	1	7.57098	A0A0D9SFP2 A0A1W2PNM1 A0A1W2PQC2 A0A1W2PQV5 A0A1W2PRT2 E9PF18 Q16836	Biological_process unknown (GO:0000004)
D6R9H7	ATP5G1	ATP synthase F(0) complex subunit C1, mitochondrial	2	2	0.665981	-0.586446	0.614636	-0.702196	-1.39639	0.0482915	0.0179887		0.268455	0.9995	7.07071	E7EPU7 E7EQ97 I3L0Y5 P05496 P48201 Q06055	Metabolism (GO:0008152); Energy pathways (GO:0006091)
P33176	KIF5B	Kinesin-1 heavy chain (Conventional kinesin heavy chain) (Ubiquitous kinesin heavy chain) (UKHC)	5	7	0.668383	-0.581254	0.616852	-0.697004	-1.38654	0.0498942	0.0180595		0.273652	0.9997	4.56906	null	Cell growth and/or maintenance (GO:0008151)
G3V438	AHSA1	Activator of 90 kDa heat shock protein ATPase homolog 1 (Fragment)	2	3	0.668512	-0.580975	0.616971	-0.696725	-1.38602	0.0499815	0.0182011		0.273652	1	12.3153	H0YJ63 H0YJG7 O95433	Biological_process unknown (GO:0000004)
P52758	RIDA	2-iminobutanoate/2-iminopropanoate deaminase (EC 3.5.99.10) (14.5 kDa translational inhibitor protein) (hp14.5) (p14.5) (Heat-responsive protein 12) (Reactive intermediate imine deaminase A homolog) (Translation inhibitor L-PSP ribonuclease) (EC 3.1.-.-)	1	1	0.668541	-0.580911	0.616998	-0.696661	-1.38589	0.0500016	0.018272		0.273652	0.9715	11.6788	null	Protein metabolism (GO:0019538)
H7BZ31	RFTN2	Raftlin-2 (Fragment)	2	2	0.66995	-0.577874	0.618299	-0.693624	-1.38013	0.0509614	0.0183428		0.277828	1	12.9534	Q52LD8	Biological_process unknown (GO:0000004)
Q6VY07	PACS1	Phosphofurin acidic cluster sorting protein 1 (PACS-1)	3	7	0.676063	-0.564771	0.62394	-0.680521	-1.35529	0.0552804	0.0187677		0.294551	1	4.98442	null	Transport (GO:0006810)
O75379	VAMP4	Vesicle-associated membrane protein 4 (VAMP-4)	1	2	0.677194	-0.562359	0.624984	-0.678109	-1.35071	0.0561078	0.0188385		0.297835	0.9687	10.6383	null	Protein transport (GO:0015031)
P23677	ITPKA	Inositol-trisphosphate 3-kinase A (EC 2.7.1.127) (Inositol 1,4,5-trisphosphate 3-kinase A) (IP3 3-kinase A) (IP3K A) (InsP 3-kinase A)	1	1	0.679307	-0.557865	0.626934	-0.673615	-1.34219	0.0576767	0.0189093		0.305017	0.9276	6.29067	null	Cell communication (GO:0007154); Signal transduction (GO:0007165)
A6PVM9	AIF1L	Allograft inflammatory factor 1-like	1	2	0.680485	-0.555364	0.628022	-0.671114	-1.33745	0.0585658	0.019051		0.306522	0.9717	22.3404	Q9BQI0	Biological_process unknown (GO:0000004)
A0A1W2PNV4		Uncharacterized protein	2	2	0.680573	-0.555177	0.628103	-0.670927	-1.3371	0.0586326	0.0191218		0.306522	0.9996	4.82456	E9PF58 Q92747
E7EX44	CALD1	Caldesmon	8	14	0.681033	-0.554204	0.628527	-0.669954	-1.33525	0.0589819	0.0191926		0.306522	1	18.851	E9PGZ1 Q05682	Cell growth and/or maintenance (GO:0008151)
P04083	ANXA1	Annexin A1 (Annexin I) (Annexin-1) (Calpactin II) (Calpactin-2) (Chromobindin-9) (Lipocortin I) (Phospholipase A2 inhibitory protein) (p35)	2	3	0.681339	-0.553555	0.62881	-0.669305	-1.33402	0.059216	0.0192635		0.306522	1	8.95954	Q5T3N0 Q5T3N1	Cell communication (GO:0007154); Signal transduction (GO:0007165)
Q15393	SF3B3	Splicing factor 3B subunit 3 (Pre-mRNA-splicing factor SF3b 130 kDa subunit) (SF3b130) (STAF130) (Spliceosome-associated protein 130) (SAP 130)	1	1	0.681669	-0.552856	0.629114	-0.668606	-1.33269	0.0594684	0.0193343		0.306522	0.9649	1.23254	null	Regulation of nucleobase, nucleoside, nucleotide and nucleic acid metabolism (GO:0019219)
P20674	COX5A	Cytochrome c oxidase subunit 5A, mitochondrial (Cytochrome c oxidase polypeptide Va)	9	17	0.682062	-0.552026	0.629477	-0.667776	-1.33112	0.05977	0.0194759		0.306522	1	33.3333	null	Metabolism (GO:0008152); Energy pathways (GO:0006091)
Q8N5G0	SMIM20	Small integral membrane protein 20 (Mitochondrial translation regulation assembly intermediate of cytochrome c oxidase protein of 7 kDa) (MITRAC7)	1	2	0.682315	-0.55149	0.62971	-0.66724	-1.3301	0.0599653	0.0195467		0.306522	1	20.8955	null	Biological_process unknown (GO:0000004)
F8VSC4	METAP2	Methionine aminopeptidase 2 (Fragment)	2	3	0.683343	-0.549318	0.630659	-0.665068	-1.32598	0.0607617	0.0196884		0.306522	1	15.528	G3V1U3 P50579	Protein metabolism (GO:0019538)
H7C342	DDT	D-dopachrome decarboxylase (Fragment)	2	4	0.683371	-0.549259	0.630685	-0.665009	-1.32587	0.0607834	0.01983		0.306522	1	22	J3KQ18 P30046	Immune response (GO:0006955)
P07737	PFN1	Profilin-1 (Epididymis tissue protein Li 184a) (Profilin I)	5	8	0.683941	-0.548056	0.631211	-0.663806	-1.32359	0.0612285	0.0199008		0.307668	1	32.8571	null	Cell growth and/or maintenance (GO:0008151)
Q6ZWB6	KCTD8	BTB/POZ domain-containing protein KCTD8	2	3	0.684997	-0.545831	0.632185	-0.661581	-1.31937	0.0620591	0.0199717		0.310735	0.9998	7.39958	null	Transport (GO:0006810)
P09669	COX6C	Cytochrome c oxidase subunit 6C (Cytochrome c oxidase polypeptide VIc)	3	3	0.685799	-0.544143	0.632925	-0.659893	-1.31617	0.0626952	0.0200425		0.311919	1	20	null	Metabolism (GO:0008152); Energy pathways (GO:0006091)
F6TLX2	GLOD4	Glyoxalase domain-containing protein 4	10	18	0.685851	-0.544032	0.632974	-0.659782	-1.31596	0.0627372	0.0201133		0.311919	1	15.9363	Q9HC38	Biological_process unknown (GO:0000004)
Q4KMP7	TBC1D10B	TBC1 domain family member 10B (Rab27A-GAP-beta)	2	2	0.686643	-0.542368	0.633705	-0.658118	-1.3128	0.0633701	0.0201841		0.312926	1	5.19802	null	Cell communication (GO:0007154); Signal transduction (GO:0007165)
P38159	RBMX	RNA-binding motif protein, X chromosome (Glycoprotein p43) (Heterogeneous nuclear ribonucleoprotein G) (hnRNP G) [Cleaved into: RNA-binding motif protein, X chromosome, N-terminally processed]	4	7	0.686659	-0.542334	0.633719	-0.658084	-1.31274	0.063383	0.020255		0.312926	1	14.0665	null	Regulation of nucleobase, nucleoside, nucleotide and nucleic acid metabolism (GO:0019219)
Q9Y6C9	MTCH2	Mitochondrial carrier homolog 2 (Met-induced mitochondrial protein)	5	8	0.688942	-0.537545	0.635826	-0.653295	-1.30366	0.0652336	0.0203966		0.319826	1	17.1617	null	Cell communication (GO:0007154); Signal transduction (GO:0007165)
K7ER15	HDHD2	Haloacid dehalogenase-like hydrolase domain-containing protein 2 (Fragment)	1	2	0.689654	-0.536055	0.636483	-0.651805	-1.30083	0.0658185	0.0205382		0.320468	0.9475	3.92157	Q9H0R4	Metabolism (GO:0008152); Energy pathways (GO:0006091)
Q9UKA9	PTBP2	Polypyrimidine tract-binding protein 2 (Neural polypyrimidine tract-binding protein) (Neurally-enriched homolog of PTB) (PTB-like protein)	7	9	0.690172	-0.534973	0.636961	-0.650723	-1.29878	0.0662461	0.0206091		0.321441	1	22.5989	null	Regulation of nucleobase, nucleoside, nucleotide and nucleic acid metabolism (GO:0019219)
H0YI90	DDI2	Protein DDI1 homolog 2 (Fragment)	2	3	0.691323	-0.532568	0.638024	-0.648318	-1.29422	0.0672044	0.0207507		0.323865	0.9996	22.3301	H0YII4 Q5TDH0	Protein metabolism (GO:0019538)
F8WCF6	ARPC4-TTLL3	Actin-related protein 2/3 complex subunit 4	5	9	0.694488	-0.525978	0.640945	-0.641728	-1.28173	0.0698884	0.0208924		0.334517	1	16.0221	P59998	Cytoskeleton organisation (GO:0007010)
H7BZL6	FSIP2	Fibrous sheath-interacting protein 2 (Fragment)	2	2	0.69888	-0.516884	0.644998	-0.632634	-1.26448	0.0737365	0.0213881		0.344755	0.9902	1.33607	Q5CZC0	Biological_process unknown (GO:0000004)
Q9HCJ6	VAT1L	Synaptic vesicle membrane protein VAT-1 homolog-like (EC 1.-.-.-)	22	48	0.699212	-0.516199	0.645304	-0.631949	-1.26318	0.0740332	0.0214589		0.345	1	31.0263	null	Biological_process unknown (GO:0000004)
P55327	TPD52	Tumor protein D52 (Protein N8)	8	14	0.700542	-0.513457	0.646532	-0.629207	-1.25798	0.0752307	0.0216006		0.348281	1	42.4107	null	Cell proliferation (GO:0008283)
H0YC42		Uncharacterized protein	8	14	0.700542	-0.513457	0.646532	-0.629207	-1.25798	0.0752307	0.0215297		0.348281	0.9999	24.4604	null
Q08174	PCDH1	Protocadherin-1 (Cadherin-like protein 1) (Protocadherin-42) (PC42)	1	2	0.7011	-0.512307	0.647047	-0.628057	-1.2558	0.0757376	0.0216714		0.349298	0.9715	1.88679	null	Cell adhesion (GO:0007155)
A0A087WVQ6	CLTC	Clathrin heavy chain	1	2	0.701417	-0.511656	0.647339	-0.627406	-1.25457	0.0760259	0.0217422		0.349298	0.9125	0.655152	Q00610	Cell growth and/or maintenance (GO:0008151)
A0A087WT53	MAGI1	Membrane-associated guanylate kinase, WW and PDZ domain-containing protein 1	1	1	0.702152	-0.510144	0.648018	-0.625894	-1.2517	0.0766988	0.0218839		0.349298	0.9652	1.64502	A0A087WXD2 H7C4U7 H7C535 H7C5T8 Q96QZ7	Cell communication (GO:0007154); Signal transduction (GO:0007165)
P20073	ANXA7	Annexin A7 (Annexin VII) (Annexin-7) (Synexin)	8	11	0.702409	-0.509616	0.648255	-0.625366	-1.2507	0.0769347	0.0220255		0.349298	1	13.1148	null	Transport (GO:0006810)
F5GXJ9	ALCAM	CD166 antigen	1	1	0.704893	-0.504523	0.650548	-0.620273	-1.24104	0.0792429	0.022238		0.356341	0.9709	2.63158	H7C543 Q13740	Immune response (GO:0006955)
A0A0A0MRG2	APP	Amyloid beta A4 protein	2	2	0.705431	-0.503422	0.651044	-0.619172	-1.23895	0.079749	0.0223088		0.356554	1	3.18182	E9PG40 H7C0V9 P05067	Cell communication (GO:0007154); Signal transduction (GO:0007165)
E5RJY1	NDRG1	Protein NDRG1	3	3	0.705481	-0.503322	0.65109	-0.619072	-1.23876	0.0797953	0.0223796		0.356554	1	39.8058	E7ESM1 Q92597	Cell communication (GO:0007154); Signal transduction (GO:0007165)
J3KQ32	OLA1	Obg-like ATPase 1	2	3	0.706163	-0.501926	0.65172	-0.617676	-1.23612	0.0804412	0.0224504		0.358306	0.9999	4.56731	Q9NTK5	Biological_process unknown (GO:0000004)
A0A0A0MS08	IGHG1	Immunoglobulin heavy constant gamma 1 (Fragment)	3	4	0.707699	-0.498792	0.653137	-0.614542	-1.23017	0.0819071	0.0225921		0.362548	1	6.51629	P01857	Immune response (GO:0006955)
P48506	GCLC	Glutamate--cysteine ligase catalytic subunit (EC 6.3.2.2) (GCS heavy chain) (Gamma-ECS) (Gamma-glutamylcysteine synthetase)	2	2	0.709576	-0.494971	0.654869	-0.610721	-1.22293	0.0837232	0.0226629		0.369429	1	4.08163	null	Metabolism (GO:0008152); Energy pathways (GO:0006091)
Q9NWQ8	PAG1	Phosphoprotein associated with glycosphingolipid-enriched microdomains 1 (Csk-binding protein) (Transmembrane adapter protein PAG) (Transmembrane phosphoprotein Cbp)	3	5	0.711895	-0.490264	0.657009	-0.606014	-1.214	0.0860051	0.0228754		0.375656	1	6.94444	null	Cell communication (GO:0007154); Signal transduction (GO:0007165)
P01112	HRAS	GTPase HRas (H-Ras-1) (Ha-Ras) (Transforming protein p21) (c-H-ras) (p21ras) [Cleaved into: GTPase HRas, N-terminally processed]	6	9	0.712607	-0.488821	0.657667	-0.60457	-1.21126	0.0867151	0.023017		0.375821	1	37.037	null	Cell communication (GO:0007154); Signal transduction (GO:0007165)
A0A087WXX2	ALDOB	Fructose-bisphosphate aldolase (EC 4.1.2.13)	4	7	0.712698	-0.488637	0.657751	-0.604387	-1.21092	0.0868055	0.0230878		0.375821	0.9977	12.6582	P05062	Metabolism (GO:0008152); Energy pathways (GO:0006091)
A0A0A0MQX7	SPOCK1	Testican-1	2	2	0.713539	-0.486936	0.658527	-0.602686	-1.20769	0.087649	0.0233003		0.376096	0.9999	6.1008	Q08629	Cell communication (GO:0007154); Signal transduction (GO:0007165)
Q68D86	CCDC102B	Coiled-coil domain-containing protein 102B	2	2	0.713786	-0.486437	0.658755	-0.602187	-1.20674	0.0878977	0.0233711		0.376096	0.9988	1.75439	null	Biological_process unknown (GO:0000004)
P00915	CA1	Carbonic anhydrase 1 (EC 4.2.1.1) (Carbonate dehydratase I) (Carbonic anhydrase B) (CAB) (Carbonic anhydrase I) (CA-I)	22	66	0.714621	-0.48475	0.659525	-0.6005	-1.20355	0.0887421	0.0234419		0.378561	1	53.2567	null	Metabolism (GO:0008152); Energy pathways (GO:0006091)
P50991	CCT4	T-complex protein 1 subunit delta (TCP-1-delta) (CCT-delta) (Stimulator of TAR RNA-binding)	9	15	0.714918	-0.48415	0.6598	-0.5999	-1.20241	0.0890442	0.0235127		0.378706	1	19.295	null	Protein metabolism (GO:0019538)
A0A0A6YYL4	CORO7-PAM16	Coronin	2	2	0.715711	-0.482552	0.660531	-0.598302	-1.19938	0.0898528	0.0235836		0.380998	0.9997	3.14885	I3L0X9 I3L1U7 I3L3T0 Q9Y3D7
P84090	ERH	Enhancer of rudimentary homolog	2	3	0.717458	-0.479034	0.662143	-0.594784	-1.19271	0.0916529	0.0236544		0.387467	0.9999	16.3462	null	Regulation of nucleobase, nucleoside, nucleotide and nucleic acid metabolism (GO:0019219)
O95865	DDAH2	N(G),N(G)-dimethylarginine dimethylaminohydrolase 2 (DDAH-2) (Dimethylarginine dimethylaminohydrolase 2) (EC 3.5.3.18) (DDAHII) (Dimethylargininase-2) (Protein G6a) (S-phase protein)	4	8	0.71781	-0.478326	0.662469	-0.594076	-1.19136	0.0920191	0.0237252		0.387854	1	11.9298	null	Metabolism (GO:0008152); Energy pathways (GO:0006091)
O14617	AP3D1	AP-3 complex subunit delta-1 (AP-3 complex subunit delta) (Adaptor-related protein complex 3 subunit delta-1) (Delta-adaptin)	1	1	0.71842	-0.4771	0.663032	-0.59285	-1.18904	0.0926553	0.023796		0.388847	0.9712	1.12749	null	Transport (GO:0006810)
M0QZN2	RPS5	40S ribosomal protein S5	1	2	0.718827	-0.476284	0.663407	-0.592034	-1.18749	0.0930808	0.0239377		0.388847	0.9438	6.71642	M0R0F0 M0R0R2 P46782	Protein metabolism (GO:0019538)
P51608	MECP2	Methyl-CpG-binding protein 2 (MeCp-2 protein) (MeCp2)	15	29	0.719287	-0.475361	0.663831	-0.591111	-1.18574	0.0935636	0.0240085		0.389469	1	21.1934	null	Regulation of nucleobase, nucleoside, nucleotide and nucleic acid metabolism (GO:0019219)
I3L0K7	TRAP1	Heat shock protein 75 kDa, mitochondrial (TNF receptor-associated protein 1, isoform CRA_b)	1	2	0.719493	-0.474946	0.664022	-0.590696	-1.18496	0.0937814	0.0240793		0.389469	0.954	2.82828	I3L239 Q12931	Protein metabolism (GO:0019538)
A0A024R3B9	CRYAB	Alpha-crystallin B chain (Crystallin, alpha B, isoform CRA_c)	3	5	0.720593	-0.472744	0.665037	-0.588494	-1.18078	0.0949443	0.0241501		0.393142	1	19.4444	E9PR44 P02511	Protein metabolism (GO:0019538)
P20618	PSMB1	Proteasome subunit beta type-1 (EC 3.4.25.1) (Macropain subunit C5) (Multicatalytic endopeptidase complex subunit C5) (Proteasome component C5) (Proteasome gamma chain)	2	3	0.72094	-0.472048	0.665358	-0.587798	-1.17946	0.0953144	0.024221		0.39352	1	12.4481	null	Protein metabolism (GO:0019538)
P10606	COX5B	Cytochrome c oxidase subunit 5B, mitochondrial (Cytochrome c oxidase polypeptide Vb)	7	20	0.725066	-0.463816	0.669165	-0.579566	-1.16385	0.0997781	0.0245751		0.406014	1	51.1628	null	Metabolism (GO:0008152); Energy pathways (GO:0006091)
P62328	TMSB4X	Thymosin beta-4 (T beta-4) (Fx) [Cleaved into: Hematopoietic system regulatory peptide (Seraspenide)]	7	21	0.725505	-0.462942	0.66957	-0.578692	-1.16219	0.100262	0.0246459		0.406808	1	54.5455	null	Cell growth and/or maintenance (GO:0008151)
F5H157	RAB35	Ras-related protein Rab-35 (Fragment)	2	3	0.727649	-0.458685	0.671549	-0.574435	-1.15412	0.102644	0.0248584		0.412914	1	5.94595	Q15286	Cell communication (GO:0007154); Signal transduction (GO:0007165)
Q9P0K9	FRRS1L	DOMON domain-containing protein FRRS1L (Brain protein CG-6) (Ferric-chelate reductase 1-like protein)	1	2	0.728819	-0.456368	0.672628	-0.572118	-1.14973	0.103959	0.025		0.415835	0.9423	3.77907	null	Biological_process unknown (GO:0000004)
P12074	COX6A1	Cytochrome c oxidase subunit 6A1, mitochondrial (Cytochrome c oxidase polypeptide VIa-liver) (Cytochrome c oxidase subunit VIA-liver) (COX VIa-L)	2	5	0.729351	-0.455314	0.67312	-0.571064	-1.14773	0.104562	0.0250708		0.416315	1	26.6055	null	Metabolism (GO:0008152); Energy pathways (GO:0006091)
Q16566	CAMK4	Calcium/calmodulin-dependent protein kinase type IV (CaMK IV) (EC 2.7.11.17) (CaM kinase-GR)	4	5	0.730529	-0.452986	0.674207	-0.568736	-1.14331	0.105903	0.0253541		0.417606	1	9.51374	null	Cell communication (GO:0007154); Signal transduction (GO:0007165)
P20290	BTF3	Transcription factor BTF3 (Nascent polypeptide-associated complex subunit beta) (NAC-beta) (RNA polymerase B transcription factor 3)	3	6	0.73093	-0.452194	0.674577	-0.567944	-1.14181	0.106362	0.0254249		0.417606	1	17.4757	null	Regulation of nucleobase, nucleoside, nucleotide and nucleic acid metabolism (GO:0019219)
P00403	MT-CO2	Cytochrome c oxidase subunit 2 (Cytochrome c oxidase polypeptide II)	3	5	0.733452	-0.447226	0.676905	-0.562975	-1.13239	0.10928	0.0256374		0.426009	1	16.2996	null	Metabolism (GO:0008152); Energy pathways (GO:0006091)
H7C2R7	SMS	Spermine synthase (Fragment)	2	2	0.733831	-0.44648	0.677255	-0.56223	-1.13097	0.109723	0.0257082		0.426009	1	6.75241	P52788	Metabolism (GO:0008152); Energy pathways (GO:0006091)
Q9UBV8	PEF1	Peflin (PEF protein with a long N-terminal hydrophobic domain) (Penta-EF hand domain-containing protein 1)	2	3	0.734034	-0.446081	0.677442	-0.561831	-1.13022	0.109961	0.025779		0.426009	0.9998	7.39437	null	Cell communication (GO:0007154); Signal transduction (GO:0007165)
P50395	GDI2	Rab GDP dissociation inhibitor beta (Rab GDI beta) (Guanosine diphosphate dissociation inhibitor 2) (GDI-2)	13	31	0.734172	-0.44581	0.677569	-0.56156	-1.1297	0.110123	0.0258499		0.426009	1	24.4944	null	Transport (GO:0006810)
A0A087WTP2	FDPS	Farnesyl pyrophosphate synthase	1	2	0.736071	-0.442083	0.679322	-0.557833	-1.12264	0.112366	0.0259915		0.430632	0.9711	22.5	A0A087WVN4 A0A087X1D8 P14324	Metabolism (GO:0008152); Energy pathways (GO:0006091)
Q9Y3F4	STRAP	Serine-threonine kinase receptor-associated protein (MAP activator with WD repeats) (UNR-interacting protein) (WD-40 repeat protein PT-WD)	3	4	0.736705	-0.440841	0.679907	-0.55659	-1.12028	0.113122	0.0261331		0.430632	1	7.42857	null	Signal transduction (GO:0007165)
Q5T440	IBA57	Putative transferase CAF17, mitochondrial (EC 2.1.-.-) (Iron-sulfur cluster assembly factor homolog)	2	2	0.737005	-0.440253	0.680184	-0.556003	-1.11917	0.11348	0.026204		0.430632	0.9997	10.3933	null	Biological_process unknown (GO:0000004)
O75964	ATP5L	ATP synthase subunit g, mitochondrial (ATPase subunit g)	8	11	0.737273	-0.439729	0.680431	-0.555479	-1.11817	0.113802	0.0262748		0.430632	1	59.2233	null	Metabolism (GO:0008152); Energy pathways (GO:0006091)
P08574	CYC1	Cytochrome c1, heme protein, mitochondrial (Complex III subunit 4) (Complex III subunit IV) (Cytochrome b-c1 complex subunit 4) (Ubiquinol-cytochrome-c reductase complex cytochrome c1 subunit) (Cytochrome c-1)	7	11	0.737864	-0.438573	0.680976	-0.554323	-1.11598	0.114512	0.0264873		0.430632	1	13.8462	null	Metabolism (GO:0008152); Energy pathways (GO:0006091)
Q5T848	GPR158	Probable G-protein coupled receptor 158	3	4	0.739329	-0.435712	0.682328	-0.551462	-1.11055	0.116285	0.0266997		0.434889	1	2.55144	null	Cell communication (GO:0007154); Signal transduction (GO:0007165)
P78417	GSTO1	Glutathione S-transferase omega-1 (GSTO-1) (EC 2.5.1.18) (Glutathione S-transferase omega 1-1) (GSTO 1-1) (Glutathione-dependent dehydroascorbate reductase) (EC 1.8.5.1) (Monomethylarsonic acid reductase) (MMA(V) reductase) (EC 1.20.4.2) (S-(Phenacyl)glut	2	3	0.739442	-0.435491	0.682433	-0.551241	-1.11014	0.116422	0.0267705		0.434889	0.9999	9.12863	null	Metabolism (GO:0008152); Energy pathways (GO:0006091)
P63000	RAC1	Ras-related C3 botulinum toxin substrate 1 (Cell migration-inducing gene 5 protein) (Ras-like protein TC25) (p21-Rac1)	8	21	0.74088	-0.432689	0.68376	-0.548439	-1.10482	0.118181	0.0268414		0.440294	1	27.0833	null	Cell communication (GO:0007154); Signal transduction (GO:0007165)
Q96ID5	IGSF21	Immunoglobulin superfamily member 21 (IgSF21)	2	3	0.742256	-0.430012	0.68503	-0.545762	-1.09975	0.119881	0.026983		0.443895	0.9999	5.99572	null	Biological_process unknown (GO:0000004)
Q9NSA3	CTNNBIP1	Beta-catenin-interacting protein 1 (Inhibitor of beta-catenin and Tcf-4)	2	3	0.744041	-0.426547	0.686677	-0.542297	-1.09318	0.122109	0.0274079		0.445523	1	19.7531	null	Signal transduction (GO:0007165)
E9PPQ4	FTH1	Ferritin (Fragment)	2	3	0.74464	-0.425386	0.68723	-0.541136	-1.09097	0.122862	0.0274788		0.445781	0.9997	18.9655	G3V192 G3V1D1 P02794	Transport (GO:0006810)
P54709	ATP1B3	Sodium/potassium-transporting ATPase subunit beta-3 (Sodium/potassium-dependent ATPase subunit beta-3) (ATPB-3) (CD antigen CD298)	4	7	0.74467	-0.425327	0.687258	-0.541077	-1.09086	0.122901	0.0275496		0.445781	1	10.3943	null	Transport (GO:0006810)
A8MVW0	FAM171A2	Protein FAM171A2	1	1	0.744849	-0.42498	0.687423	-0.54073	-1.0902	0.123127	0.0276204		0.445781	0.9694	1.69492	null	Biological_process unknown (GO:0000004)
P11169	SLC2A3	Solute carrier family 2, facilitated glucose transporter member 3 (Glucose transporter type 3, brain) (GLUT-3)	6	10	0.747362	-0.420121	0.689742	-0.535871	-1.08099	0.126326	0.0278329		0.452369	1	12.5	null	Transport (GO:0006810)
F5GX30	M6PR	Cation-dependent mannose-6-phosphate receptor	1	1	0.74776	-0.419353	0.69011	-0.535103	-1.07953	0.126838	0.0279037		0.452369	0.9267	10.9948	H0YF90 P20645	Protein metabolism (GO:0019538)
B7Z4G8	APLP1	Amyloid-like protein 1 (cDNA FLJ56046, highly similar to Amyloid-like protein 1 (APLP)(APLP-1))	2	2	0.7487	-0.417541	0.690977	-0.533291	-1.0761	0.128051	0.0280453		0.452369	1	2.17391	F5GZ08 K7EMN4 P51693	Synapse organization and biogenesis (GO:0050808)
Q96T17	MAP7D2	MAP7 domain-containing protein 2	4	8	0.748852	-0.417248	0.691117	-0.532998	-1.07554	0.128248	0.0281161		0.452369	1	5.05465	null	Biological_process unknown (GO:0000004)
O14531	DPYSL4	Dihydropyrimidinase-related protein 4 (DRP-4) (Collapsin response mediator protein 3) (CRMP-3) (UNC33-like phosphoprotein 4) (ULIP-4)	13	22	0.74893	-0.417098	0.691189	-0.532848	-1.07526	0.128349	0.028187		0.452369	1	26.049	null	Metabolism (GO:0008152); Energy pathways (GO:0006091)
P30613	PKLR	Pyruvate kinase PKLR (EC 2.7.1.40) (Pyruvate kinase 1) (Pyruvate kinase isozymes L/R) (R-type/L-type pyruvate kinase) (Red cell/liver pyruvate kinase)	5	12	0.749122	-0.416727	0.691367	-0.532477	-1.07456	0.128599	0.0282578		0.452369	1	5.05227	null	Metabolism (GO:0008152)
P49069	CAMLG	Calcium signal-modulating cyclophilin ligand (CAML)	1	1	0.749239	-0.416502	0.691475	-0.532252	-1.07413	0.128751	0.0283286		0.452369	0.968	7.43243	null	Cell communication (GO:0007154); Signal transduction (GO:0007165)
O14548	COX7A2L	Cytochrome c oxidase subunit 7A-related protein, mitochondrial (COX7a-related protein) (Cytochrome c oxidase subunit VIIa-related protein) (EB1)	4	6	0.749253	-0.416476	0.691487	-0.532226	-1.07408	0.128769	0.0283994		0.452369	1	20.1754	null	Metabolism (GO:0008152); Energy pathways (GO:0006091)
H3BNB3	SCAMP5	Secretory carrier-associated membrane protein (Secretory carrier membrane protein) (Fragment)	2	3	0.749635	-0.41574	0.69184	-0.53149	-1.07268	0.129266	0.0284703		0.452369	0.9999	9.47368	H3BNH7 H3BNW6 H3BP89 H3BS22 H3BT30 H3BTD1 H3BU33 Q8TAC9	Transport (GO:0006810)
A0A0C4DG21	ABI2	Abl interactor 2	2	3	0.74986	-0.415308	0.692047	-0.531058	-1.07186	0.129559	0.0286119		0.452369	1	7.10059	B7Z836 E7EP65 E7EW77 F8WAL6 H0Y6B5 Q9NYB9	Cell communication (GO:0007154); Signal transduction (GO:0007165); Regulation of cell proliferation (GO:0042127)
Q9BX68	HINT2	Histidine triad nucleotide-binding protein 2, mitochondrial (HINT-2) (EC 3.-.-.-) (HINT-3) (HIT-17kDa) (PKCI-1-related HIT protein)	2	4	0.751183	-0.412763	0.693269	-0.528513	-1.06704	0.131294	0.0288952		0.452369	1	21.4724	null	Metabolism (GO:0008152); Energy pathways (GO:0006091)
Q16762	TST	Thiosulfate sulfurtransferase (EC 2.8.1.1) (Rhodanese)	5	7	0.751311	-0.412517	0.693387	-0.528267	-1.06657	0.131463	0.028966		0.452369	1	18.8552	null	Metabolism (GO:0008152); Energy pathways (GO:0006091)
Q9H0U4	RAB1B	Ras-related protein Rab-1B	3	5	0.751441	-0.412269	0.693506	-0.528019	-1.0661	0.131633	0.0290368		0.452369	0.9984	12.4378	null	Cell communication (GO:0007154); Signal transduction (GO:0007165)
P80723	BASP1	Brain acid soluble protein 1 (22 kDa neuronal tissue-enriched acidic protein) (Neuronal axonal membrane protein NAP-22)	31	120	0.751715	-0.411743	0.693759	-0.527493	-1.0651	0.131994	0.0291785		0.452369	1	82.8194	null	Regulation of nucleobase, nucleoside, nucleotide and nucleic acid metabolism (GO:0019219)
P15121	AKR1B1	Aldose reductase (AR) (EC 1.1.1.21) (Aldehyde reductase) (Aldo-keto reductase family 1 member B1)	6	14	0.752485	-0.410266	0.69447	-0.526016	-1.0623	0.133014	0.0293909		0.452568	1	18.3544	null	Metabolism (GO:0008152); Energy pathways (GO:0006091)
A0A0A0MTP9	FAIM2	Protein lifeguard 2 (Fragment)	2	2	0.753342	-0.408623	0.695261	-0.524373	-1.05919	0.134155	0.0294618		0.455354	0.9998	8.87097	F8VZI9 Q9BWQ8	Apoptosis (GO:0006915)
A0A0A0MSQ6	SHANK2	SH3 and multiple ankyrin repeat domains protein 2	1	2	0.755231	-0.40501	0.697005	-0.52076	-1.05233	0.136691	0.0296034		0.461742	0.9717	2.37906	A6NHU9 E7EUA2 H7C1X5 Q9UPX8	Cell growth and/or maintenance (GO:0008151)
C9JC84	FGG	Fibrinogen gamma chain	2	2	0.756768	-0.402077	0.698423	-0.517827	-1.04677	0.138777	0.0296742		0.467051	1	8.89371	C9JEU5 P02679	Protein metabolism (GO:0019538)
G3V1N2	HBA2	HCG1745306, isoform CRA_a (Hemoglobin subunit alpha)	31	195	0.757553	-0.400582	0.699147	-0.516331	-1.04394	0.13985	0.0298159		0.469045	1	72.7273	null	Transport (GO:0006810)
E7EPC8	CTNND2	Catenin delta-2	2	3	0.758558	-0.398668	0.700075	-0.514418	-1.04031	0.141232	0.0298867		0.472121	1	2.02822	Q9UQB3	Cell communication (GO:0007154); Signal transduction (GO:0007165)
Q8NBX0	SCCPDH	Saccharopine dehydrogenase-like oxidoreductase (EC 1.-.-.-)	4	6	0.758706	-0.398387	0.700212	-0.514137	-1.03978	0.141436	0.0299575		0.472121	1	9.32401	null	Biological_process unknown (GO:0000004)
P07919	UQCRH	Cytochrome b-c1 complex subunit 6, mitochondrial (Complex III subunit 6) (Complex III subunit VIII) (Cytochrome c1 non-heme 11 kDa protein) (Mitochondrial hinge protein) (Ubiquinol-cytochrome c reductase complex 11 kDa protein)	4	5	0.759437	-0.396998	0.700886	-0.512748	-1.03714	0.142447	0.0300992		0.472264	0.999	53.8462	null	Metabolism (GO:0008152); Energy pathways (GO:0006091)
A0A024RA52	PSMA2	Proteasome subunit alpha type (EC 3.4.25.1)	2	3	0.761324	-0.393418	0.702628	-0.509168	-1.03035	0.145078	0.0303116		0.478622	1	5.1282	P25787	Protein metabolism (GO:0019538)
P17987	TCP1	T-complex protein 1 subunit alpha (TCP-1-alpha) (CCT-alpha)	4	5	0.764611	-0.387203	0.705661	-0.502953	-1.01857	0.149734	0.0304533		0.489633	1	5.93525	null	Protein metabolism (GO:0019538)
A6NCQ0	NUDT5	ADP-sugar pyrophosphatase	3	4	0.766349	-0.383926	0.707265	-0.499676	-1.01236	0.152234	0.0306657		0.489633	1	15	A6NFX8 A6NJU6 C9JYY9 Q9UKK9	Metabolism (GO:0008152); Energy pathways (GO:0006091)
P02647	APOA1	Apolipoprotein A-I (Apo-AI) (ApoA-I) (Apolipoprotein A1) [Cleaved into: Proapolipoprotein A-I (ProapoA-I); Truncated apolipoprotein A-I (Apolipoprotein A-I(1-242))]	15	34	0.766662	-0.383338	0.707554	-0.499088	-1.01124	0.152686	0.0308782		0.489633	1	38.5768	null	Transport (GO:0006810)
Q14118	DAG1	Dystroglycan (Dystrophin-associated glycoprotein 1) [Cleaved into: Alpha-dystroglycan (Alpha-DG); Beta-dystroglycan (Beta-DG)]	2	3	0.766805	-0.383069	0.707686	-0.498818	-1.01073	0.152893	0.030949		0.489633	0.9999	2.68156	null	Cell communication (GO:0007154); Signal transduction (GO:0007165)
H0YCY6	TKFC	Triokinase/FMN cyclase (Fragment)	2	4	0.767284	-0.382167	0.708129	-0.497917	-1.00902	0.153589	0.0312323		0.489633	1	4.12758	I3L252 Q3LXA3	Metabolism (GO:0008152)
A0A087WT21	CECR2	Cat eye syndrome critical region protein 2	2	2	0.767347	-0.38205	0.708186	-0.4978	-1.0088	0.15368	0.0313031		0.489633	0.9986	1.38696	Q9BXF3	Cell communication (GO:0007154); Signal transduction (GO:0007165)
A0A087WY55	VTA1	Chromosome 6 open reading frame 55, isoform CRA_b (Vacuolar protein sorting-associated protein VTA1 homolog)	3	5	0.767695	-0.381395	0.708507	-0.497145	-1.00755	0.154187	0.0314448		0.489633	1	9.64286	Q9NP79	Biological_process unknown (GO:0000004)
Q09666	AHNAK	Neuroblast differentiation-associated protein AHNAK (Desmoyokin)	41	69	0.767829	-0.381144	0.708631	-0.496894	-1.00708	0.154382	0.0315156		0.489633	1	7.8438	null	Muscle contraction (GO:0006936)
Q9HCD5	NCOA5	Nuclear receptor coactivator 5 (NCoA-5) (Coactivator independent of AF-2) (CIA)	2	6	0.769914	-0.377231	0.710556	-0.492981	-0.999658	0.157441	0.0318697		0.491849	1	5.87219	null	Regulation of nucleobase, nucleoside, nucleotide and nucleic acid metabolism (GO:0019219)
O94826	TOMM70	Mitochondrial import receptor subunit TOM70 (Mitochondrial precursor proteins import receptor) (Translocase of outer membrane 70 kDa subunit) (Translocase of outer mitochondrial membrane protein 70)	3	5	0.770154	-0.376781	0.710777	-0.492531	-0.998805	0.157796	0.0320822		0.491849	1	12.0066	null	Transport (GO:0006810)
F8WD64	STUM	Protein stum homolog	1	1	0.770811	-0.375552	0.711383	-0.491302	-0.996474	0.158768	0.0322238		0.492704	0.9712	9.21986	Q69YW2
A0A0C4DFV9	SET	Protein SET	8	19	0.77156	-0.374151	0.712074	-0.489901	-0.993817	0.159882	0.0323654		0.493343	1	16.5414	Q01105	Regulation of nucleobase, nucleoside, nucleotide and nucleic acid metabolism (GO:0019219)
D6RI11	CPLX1	Complexin-1	8	18	0.771865	-0.37358	0.712356	-0.48933	-0.992736	0.160337	0.0324363		0.493343	1	38.9381	O14810	Transport (GO:0006810)
Q96A05	ATP6V1E2	V-type proton ATPase subunit E 2 (V-ATPase subunit E 2) (Vacuolar proton pump subunit E 2)	3	5	0.772007	-0.373315	0.712487	-0.489065	-0.992233	0.160549	0.0325071		0.493343	0.9904	9.29204	null	Transport (GO:0006810)
A0A087X0H8	TSC22D1	TSC22 domain family protein 1	2	4	0.772122	-0.3731	0.712593	-0.48885	-0.991825	0.160721	0.0325779		0.493343	1	13.9535	Q15714	Regulation of cell growth (GO:0001558)
P49915	GMPS	GMP synthase [glutamine-hydrolyzing] (EC 6.3.5.2) (GMP synthetase) (Glutamine amidotransferase)	1	2	0.772653	-0.372108	0.713083	-0.487858	-0.989944	0.161516	0.0326487		0.494707	0.9704	3.6075	null	Metabolism (GO:0008152); Energy pathways (GO:0006091)
P56181	NDUFV3	NADH dehydrogenase [ubiquinone] flavoprotein 3, mitochondrial (Complex I-9kD) (CI-9kD) (NADH-ubiquinone oxidoreductase 9 kDa subunit) (Renal carcinoma antigen NY-REN-4)	2	4	0.773103	-0.371267	0.713499	-0.487017	-0.988349	0.162192	0.0327195		0.495704	1	19.4444	null	Metabolism (GO:0008152); Energy pathways (GO:0006091)
K7EL68	CDC37	Hsp90 co-chaperone Cdc37 (Fragment)	2	3	0.774013	-0.369571	0.714338	-0.485321	-0.985134	0.163563	0.0327904		0.498813	0.9999	22.8261	Q16543	Protein metabolism (GO:0019538)
O43761	SYNGR3	Synaptogyrin-3	1	2	0.774433	-0.368788	0.714726	-0.484538	-0.983648	0.164199	0.0328612		0.499164	0.971	5.24017	Q96L30	Transport (GO:0006810)
A0A087WU65	VPS45	Vacuolar protein sorting-associated protein 45	2	3	0.774626	-0.368428	0.714904	-0.484178	-0.982965	0.164492	0.032932		0.499164	1	3.13199	Q9NRW7	Transport (GO:0006810)
P26196	DDX6	Probable ATP-dependent RNA helicase DDX6 (EC 3.6.4.13) (ATP-dependent RNA helicase p54) (DEAD box protein 6) (Oncogene RCK)	2	4	0.774789	-0.368125	0.715054	-0.483875	-0.982391	0.164738	0.0330028		0.499164	1	3.51967	null	Regulation of nucleobase, nucleoside, nucleotide and nucleic acid metabolism (GO:0019219)
O75368	SH3BGRL	SH3 domain-binding glutamic acid-rich-like protein	1	1	0.775743	-0.366349	0.715935	-0.482099	-0.979023	0.166191	0.0331445		0.501166	0.9243	11.4035	null	Cell communication (GO:0007154); Signal transduction (GO:0007165)
C9J5P8	SLC6A1	Sodium- and chloride-dependent GABA transporter 1 (Fragment)	2	6	0.777234	-0.363579	0.717311	-0.479329	-0.973771	0.168475	0.0333569		0.505067	1	55.2632	P30531	Transport (GO:0006810)
P55809	OXCT1	Succinyl-CoA:3-ketoacid coenzyme A transferase 1, mitochondrial (EC 2.8.3.5) (3-oxoacid CoA-transferase 1) (Somatic-type succinyl-CoA:3-oxoacid CoA-transferase) (SCOT-s)	7	14	0.777996	-0.362166	0.718014	-0.477916	-0.97109	0.16965	0.0334986		0.50644	1	11.7308	null	Metabolism (GO:0008152); Energy pathways (GO:0006091)
A0A087X0K9	TJP1	Tight junction protein ZO-1	1	1	0.778602	-0.361042	0.718574	-0.476792	-0.968959	0.170589	0.0335694		0.508167	0.9677	1.49165	G3V1L9 G5E9E7 H0Y3R8 Q07157	Cell growth and/or maintenance (GO:0008151)
C9IZG4	CUTA	Protein CutA	3	4	0.780131	-0.358212	0.719985	-0.473962	-0.963593	0.172969	0.0337819		0.510921	1	20.7407	O60888	Biological_process unknown (GO:0000004)
P50151	GNG10	Guanine nucleotide-binding protein G(I)/G(S)/G(O) subunit gamma-10	2	3	0.780367	-0.357775	0.720203	-0.473525	-0.962764	0.173339	0.0338527		0.510921	1	45.5882	null	Cell communication (GO:0007154); Signal transduction (GO:0007165)
F5H6A0	CLIP1	CAP-Gly domain-containing linker protein 1 (Fragment)	3	5	0.781415	-0.355839	0.72117	-0.471589	-0.959094	0.174984	0.0340652		0.512126	1	2.73973	J3KP58 P30622	Mitosis (GO:0007067)
K7ERI9	APOC1	Apolipoprotein C-I (Fragment)	1	2	0.781472	-0.355734	0.721223	-0.471484	-0.958894	0.175074	0.034136		0.512126	0.9419	14.2857	P02654	Transport (GO:0006810)
A0A0C4DGK8	APEX1	DNA-(apurinic or apyrimidinic site) lyase (EC 4.2.99.18) (Fragment)	6	14	0.783527	-0.351945	0.723119	-0.467695	-0.95171	0.178328	0.0343484		0.516877	1	27.3973	G3V3C7 G3V3M6 G3V5D9 G3V5Q1 P27695	Regulation of nucleobase, nucleoside, nucleotide and nucleic acid metabolism (GO:0019219)
Q96FJ2	DYNLL2	Dynein light chain 2, cytoplasmic (8 kDa dynein light chain b) (DLC8b) (Dynein light chain LC8-type 2)	6	14	0.784192	-0.35072	0.723733	-0.46647	-0.949387	0.17939	0.0346317		0.516877	1	26.9663	null	Cell growth and/or maintenance (GO:0008151)
P14927	UQCRB	Cytochrome b-c1 complex subunit 7 (Complex III subunit 7) (Complex III subunit VII) (QP-C) (Ubiquinol-cytochrome c reductase complex 14 kDa protein)	21	62	0.785126	-0.349004	0.724595	-0.464754	-0.946132	0.180886	0.0348442		0.517424	1	81.0811	null	Metabolism (GO:0008152); Energy pathways (GO:0006091)
B4DXW1	ACTR3	Actin-related protein 3 (cDNA FLJ51148, highly similar to Actin-like protein 3) (cDNA FLJ52434, highly similar to Actin-like protein 3) (cDNA, FLJ79112, highly similar to Actin-like protein 3) (cDNA, FLJ79295, highly similar to Actin-like protein 3)	2	2	0.785441	-0.348426	0.724885	-0.464176	-0.945036	0.181392	0.0350567		0.517424	1	3.26975	P61158	Cell growth and/or maintenance (GO:0008151)
F8WDN2	TXN2	Thioredoxin, mitochondrial	2	4	0.785928	-0.34753	0.725335	-0.46328	-0.943337	0.182178	0.0351275		0.518064	1	14.3836	Q99757	Metabolism (GO:0008152); Energy pathways (GO:0006091)
Q9UQ16	DNM3	Dynamin-3 (EC 3.6.5.5) (Dynamin, testicular) (T-dynamin)	2	4	0.787383	-0.344863	0.726677	-0.460613	-0.93828	0.184532	0.0353399		0.522164	0.9716	7.13464	null	Cell communication (GO:0007154); Signal transduction (GO:0007165)
P11279	LAMP1	Lysosome-associated membrane glycoprotein 1 (LAMP-1) (Lysosome-associated membrane protein 1) (CD107 antigen-like family member A) (CD antigen CD107a)	1	1	0.789913	-0.340235	0.729012	-0.455985	-0.929504	0.188672	0.0355524		0.526462	0.9697	2.63789	null	Biological_process unknown (GO:0000004)
B8ZZF0	PPM1B	Protein phosphatase 1B (Fragment)	4	5	0.790257	-0.339606	0.72933	-0.455356	-0.928311	0.18924	0.0356941		0.526462	1	18.4818	C9JIR6 O75688	Signal transduction (GO:0007165)
A0A0C4DGV4	LAMTOR5	Hepatitis B virus x interacting protein (Ragulator complex protein LAMTOR5)	1	1	0.790351	-0.339435	0.729416	-0.455185	-0.927987	0.189395	0.0357649		0.526462	0.9522	5.78035	E9PLX3 O43504 R4GMU8	Immune response (GO:0006955)
H0YHI8	PPP1R12A	Protein phosphatase 1 regulatory subunit 12A (Fragment)	1	2	0.790463	-0.33923	0.72952	-0.45498	-0.927598	0.18958	0.0358357		0.526462	0.9717	4.63215	O14974	Metabolism (GO:0008152); Energy pathways (GO:0006091)
P55087	AQP4	Aquaporin-4 (AQP-4) (Mercurial-insensitive water channel) (MIWC) (WCH4)	7	14	0.790702	-0.338793	0.729741	-0.454543	-0.92677	0.189976	0.0360482		0.526462	1	15.1703	V9PBN7	Transport (GO:0006810)
Q9NUP9	LIN7C	Protein lin-7 homolog C (Lin-7C) (Mammalian lin-seven protein 3) (MALS-3) (Vertebrate lin-7 homolog 3) (Veli-3)	6	7	0.791034	-0.338188	0.730048	-0.453938	-0.925622	0.190525	0.0361898		0.526462	0.9994	20.8122	null	Cell communication (GO:0007154); Signal transduction (GO:0007165)
Q92783	STAM	Signal transducing adapter molecule 1 (STAM-1)	4	6	0.79211	-0.336228	0.73104	-0.451978	-0.921905	0.192312	0.0364023		0.528296	1	6.66667	null	Cell communication (GO:0007154); Signal transduction (GO:0007165)
Q9UQ80	PA2G4	Proliferation-associated protein 2G4 (Cell cycle protein p38-2G4 homolog) (hG4-1) (ErbB3-binding protein 1)	2	2	0.792787	-0.334995	0.731665	-0.450744	-0.919566	0.193442	0.0364731		0.53037	1	2.28426	null	Regulation of nucleobase, nucleoside, nucleotide and nucleic acid metabolism (GO:0019219)
P05387	RPLP2	60S acidic ribosomal protein P2 (Large ribosomal subunit protein P2) (Renal carcinoma antigen NY-REN-44)	9	19	0.793388	-0.333902	0.73222	-0.449652	-0.917494	0.194448	0.0365439		0.532095	1	84.3478	null	Protein metabolism (GO:0019538)
P36871	PGM1	Phosphoglucomutase-1 (PGM 1) (EC 5.4.2.2) (Glucose phosphomutase 1)	3	6	0.79428	-0.33228	0.733043	-0.44803	-0.914419	0.195948	0.0366147		0.535161	1	6.58363	null	Metabolism (GO:0008152); Energy pathways (GO:0006091)
P05413	FABP3	Fatty acid-binding protein, heart (Fatty acid-binding protein 3) (Heart-type fatty acid-binding protein) (H-FABP) (Mammary-derived growth inhibitor) (MDGI) (Muscle fatty acid-binding protein) (M-FABP)	7	12	0.794955	-0.331055	0.733666	-0.446805	-0.912095	0.197086	0.0367564		0.536196	1	53.3835	S4R371	Transport (GO:0006810)
D6R9J0	PCYOX1L	Prenylcysteine oxidase-like	1	2	0.796138	-0.32891	0.734758	-0.44466	-0.908028	0.199091	0.0370397		0.5366	0.9717	21.6216	Q8NBM8	Biological_process unknown (GO:0000004)
Q9Y5Z4	HEBP2	Heme-binding protein 2 (Placental protein 23) (PP23) (Protein SOUL)	3	4	0.796833	-0.327651	0.735399	-0.443401	-0.90564	0.200275	0.0373229		0.5366	1	9.26829	null	Biological_process unknown (GO:0000004)
Q00765	REEP5	Receptor expression-enhancing protein 5 (Polyposis locus protein 1) (Protein TB2)	6	10	0.797446	-0.326541	0.735965	-0.442291	-0.903537	0.201322	0.0373938		0.538014	1	17.4603	null	Biological_process unknown (GO:0000004)
P06703	S100A6	Protein S100-A6 (Calcyclin) (Growth factor-inducible protein 2A9) (MLN 4) (Prolactin receptor-associated protein) (PRA) (S100 calcium-binding protein A6)	8	14	0.797687	-0.326106	0.736187	-0.441856	-0.902711	0.201734	0.0374646		0.538014	1	25.5556	R4GN98	Cell communication (GO:0007154); Signal transduction (GO:0007165)
C9JRZ6	CHCHD3	MICOS complex subunit	13	24	0.79781	-0.325883	0.736301	-0.441633	-0.902288	0.201946	0.0375354		0.538014	1	29.3103	Q9NX63	Biological_process unknown (GO:0000004)
G3V3E6	ERO1A	ERO1-like protein alpha	1	2	0.798441	-0.324742	0.736884	-0.440491	-0.900124	0.20303	0.0376062		0.539883	1	5.44747	G3V5B3 Q96HE7
Q9BR76	CORO1B	Coronin-1B (Coronin-2)	2	4	0.798888	-0.323935	0.737296	-0.439685	-0.898595	0.203798	0.0377479		0.539893	1	3.06749	null	Cell motility (GO:0006928)
P47914	RPL29	60S ribosomal protein L29 (Cell surface heparin-binding protein HIP) (Large ribosomal subunit protein eL29)	2	4	0.79938	-0.323047	0.737749	-0.438797	-0.896911	0.204647	0.0378187		0.540069	1	9.43396	null	Protein metabolism (GO:0019538)
P82909	MRPS36	28S ribosomal protein S36, mitochondrial (MRP-S36) (S36mt)	6	18	0.799799	-0.322291	0.738136	-0.438041	-0.895477	0.205372	0.0378895		0.540069	1	59.2233	null	Protein metabolism (GO:0019538)
B7Z8J4	NMT1	Glycylpeptide N-tetradecanoyltransferase 1 (cDNA FLJ54222, highly similar to Glycylpeptide N-tetradecanoyltransferase 1 (EC 2.3.1.97))	1	1	0.799817	-0.322259	0.738153	-0.438009	-0.895415	0.205403	0.0379603		0.540069	0.9643	15.3285	P30419	Protein metabolism (GO:0019538)
B7Z7F3	RANBP3	Ran-binding protein 3 (cDNA FLJ58549, highly similar to Ran-binding protein 3)	2	3	0.799884	-0.322137	0.738215	-0.437887	-0.895185	0.205519	0.0380312		0.540069	0.9998	2.02429	K7EIJ4 Q9H6Z4	Cell communication (GO:0007154); Signal transduction (GO:0007165)
P10253	GAA	Lysosomal alpha-glucosidase (EC 3.2.1.20) (Acid maltase) (Aglucosidase alfa) [Cleaved into: 76 kDa lysosomal alpha-glucosidase; 70 kDa lysosomal alpha-glucosidase]	1	1	0.800089	-0.321768	0.738404	-0.437518	-0.894486	0.205874	0.038102		0.540069	0.9717	2.83613	null	Metabolism (GO:0008152); Energy pathways (GO:0006091)
B1AHR1	03-sep	Neuronal-specific septin-3	7	9	0.800254	-0.321471	0.738556	-0.437221	-0.893922	0.20616	0.0381728		0.540069	1	17.6871	Q9UH03	Cell communication (GO:0007154); Signal transduction (GO:0007165)
Q96C19	EFHD2	EF-hand domain-containing protein D2 (Swiprosin-1)	5	8	0.800798	-0.32049	0.739058	-0.43624	-0.892062	0.207105	0.0382436		0.541542	1	25.8333	null	Biological_process unknown (GO:0000004)
Q01518	CAP1	Adenylyl cyclase-associated protein 1 (CAP 1)	8	10	0.802493	-0.317439	0.740623	-0.433189	-0.886276	0.210066	0.0383853		0.546008	1	17.2632	null	Cell growth and/or maintenance (GO:0008151)
A0A024R6I7	SERPINA1	Alpha-1-antitrypsin (Serpin peptidase inhibitor, clade A (Alpha-1 antiproteinase, antitrypsin), member 1, isoform CRA_a)	7	10	0.802874	-0.316755	0.740974	-0.432505	-0.884978	0.210735	0.0385269		0.546008	1	16.0287	P01009	Protein metabolism (GO:0019538)
Q06124	PTPN11	Tyrosine-protein phosphatase non-receptor type 11 (EC 3.1.3.48) (Protein-tyrosine phosphatase 1D) (PTP-1D) (Protein-tyrosine phosphatase 2C) (PTP-2C) (SH-PTP2) (SHP-2) (Shp2) (SH-PTP3)	1	1	0.803771	-0.315144	0.741802	-0.430894	-0.881924	0.212314	0.0387394		0.546008	0.9693	4.69012	null	Cell communication (GO:0007154); Signal transduction (GO:0007165)
P49755	TMED10	Transmembrane emp24 domain-containing protein 10 (21 kDa transmembrane-trafficking protein) (S31III125) (S31I125) (Tmp-21-I) (Transmembrane protein Tmp21) (p23) (p24 family protein delta-1) (p24delta1) (p24delta)	2	6	0.803776	-0.315134	0.741807	-0.430884	-0.881906	0.212323	0.038881		0.546008	1	4.10959	null	Transport (GO:0006810)
F2Z2Y6	LSM8	U6 snRNA-associated Sm-like protein LSm8	1	2	0.804897	-0.313123	0.742842	-0.428873	-0.878092	0.214307	0.0391643		0.547199	0.9017	14.9254	O95777	Regulation of nucleobase, nucleoside, nucleotide and nucleic acid metabolism (GO:0019219)
H0Y6F5	ZHX3	Zinc fingers and homeoboxes protein 3 (Fragment)	1	2	0.805244	-0.312501	0.743162	-0.428251	-0.876913	0.214923	0.0392351		0.547782	0.9717	3.24484	Q9H4I2	Regulation of nucleobase, nucleoside, nucleotide and nucleic acid metabolism (GO:0019219)
H3BPG7	CIAPIN1	Anamorsin	2	2	0.806198	-0.310795	0.744042	-0.426545	-0.873677	0.21662	0.0394476		0.549134	0.9998	6.27615	H3BT65 H3BV90 Q6FI81	Cell growth and/or maintenance (GO:0008151)
H0YCU9	TAGLN	Transgelin (Fragment)	11	22	0.80731	-0.308805	0.745068	-0.424555	-0.869904	0.218611	0.0395184		0.553188	1	31.7881	Q01995	Muscle development (GO:0007517)
P41208	CETN2	Centrin-2 (Caltractin isoform 1)	1	2	0.811025	-0.302182	0.748497	-0.417932	-0.857345	0.225333	0.0398017		0.56614	0.9715	19.186	null	Cell communication (GO:0007154); Signal transduction (GO:0007165)
H7BZT7	ESD	S-formylglutathione hydrolase (EC 3.1.2.12) (Fragment)	3	5	0.812966	-0.298733	0.750288	-0.414483	-0.850805	0.228891	0.040085		0.571015	1	14.7826	P10768 X6RA14	Metabolism (GO:0008152); Energy pathways (GO:0006091)
F6RFD5	DSTN	Destrin	6	10	0.816234	-0.292945	0.753305	-0.408695	-0.839828	0.234953	0.0403683		0.581389	0.9999	16.2963	P60981	Cell growth and/or maintenance (GO:0008151)
Q99549	MPHOSPH8	M-phase phosphoprotein 8 (Two hybrid-associated protein 3 with RanBPM) (Twa3)	1	2	0.816538	-0.292409	0.753584	-0.408159	-0.838812	0.23552	0.0405099		0.581389	0.9998	3.95349	null	Cell growth and/or maintenance (GO:0008151)
D6RGV5	COX7A2	Cytochrome c oxidase subunit 7A2, mitochondrial (Fragment)	3	5	0.816923	-0.291727	0.753941	-0.407477	-0.837519	0.236243	0.0405807		0.581421	1	22.3301	D6RIE3 H0UI06 P14406	Metabolism (GO:0008152); Energy pathways (GO:0006091)
Q16658	FSCN1	Fascin (55 kDa actin-bundling protein) (Singed-like protein) (p55)	2	3	0.817875	-0.290047	0.754819	-0.405797	-0.834333	0.23803	0.0407224		0.584519	1	5.27383	null	Cell growth and/or maintenance (GO:0008151)
A6NMY6	ANXA2P2	Putative annexin A2-like protein (Annexin A2 pseudogene 2) (Lipocortin II pseudogene)	6	10	0.819404	-0.287353	0.75623	-0.403103	-0.829225	0.240916	0.040864		0.585853	1	13.2743	H0YKS4 H0YMD0 H0YMU9 H0YN42 P07355
A0A087WW96	SYN2	Synapsin-2	17	28	0.819413	-0.287338	0.756238	-0.403088	-0.829196	0.240932	0.0409348		0.585853	1	26.6323	null	Cell communication (GO:0007154)
A0A087WZX2	NDUFB6	NADH dehydrogenase [ubiquinone] 1 beta subcomplex subunit 6	4	10	0.819594	-0.287018	0.756405	-0.402768	-0.82859	0.241276	0.0410057		0.585853	1	25.7732	O95139	Electron transport (GO:0006118); Energy pathways (GO:0006091)
P24534	EEF1B2	Elongation factor 1-beta (EF-1-beta)	1	2	0.820768	-0.284953	0.757489	-0.400703	-0.824673	0.243508	0.041289		0.585853	0.9717	5.77778	null	Protein metabolism (GO:0019538)
A0A087WU07	MINOS1	MICOS complex subunit MIC10	2	4	0.820875	-0.284766	0.757587	-0.400516	-0.824319	0.243711	0.0415014		0.585853	1	11.2903	Q5TGZ0 R4GMY4 R4GNA1
G3V4C6	C14orf166	UPF0568 protein C14orf166	2	3	0.821222	-0.284156	0.757907	-0.399906	-0.823163	0.244372	0.0415722		0.585853	1	5.18135	G3V4E7 Q9Y224	Regulation of nucleobase, nucleoside, nucleotide and nucleic acid metabolism (GO:0019219)
Q15075	EEA1	Early endosome antigen 1 (Endosome-associated protein p162) (Zinc finger FYVE domain-containing protein 2)	10	13	0.821509	-0.283651	0.758173	-0.399401	-0.822204	0.244922	0.0417139		0.585853	1	6.87456	null	Transport (GO:0006810)
A0A087X0H9	RBM26	RNA-binding protein 26	2	4	0.822754	-0.281467	0.759322	-0.397217	-0.818063	0.247307	0.0419263		0.588194	1	2.67592	Q5T8P6	Regulation of nucleobase, nucleoside, nucleotide and nucleic acid metabolism (GO:0019219)
Q5JTJ3	COA6	Cytochrome c oxidase assembly factor 6 homolog	3	7	0.822764	-0.28145	0.759331	-0.3972	-0.818031	0.247326	0.0419972		0.588194	1	13.6	X6R5Z6	Metabolism (GO:0008152); Energy pathways (GO:0006091)
B4DJM9	SARS2	Serine--tRNA ligase, mitochondrial (cDNA FLJ58068, highly similar to Seryl-tRNA synthetase, mitochondrial (EC 6.1.1.11))	2	3	0.823303	-0.280505	0.759828	-0.396254	-0.816238	0.248363	0.0421388		0.589393	1	6.77966	M0QWZ7 M0R2C6 Q9NP81	Protein metabolism (GO:0019538)
P17677	GAP43	Neuromodulin (Axonal membrane protein GAP-43) (Growth-associated protein 43) (Neural phosphoprotein B-50) (pp46)	22	78	0.824041	-0.279211	0.76051	-0.394961	-0.813786	0.249787	0.0422096		0.591389	1	66.3866	null	Cell communication (GO:0007154); Signal transduction (GO:0007165)
Q9UK22	FBXO2	F-box only protein 2	4	8	0.824369	-0.278637	0.760813	-0.394387	-0.812696	0.250422	0.0422805		0.591389	1	8.78378	null	Protein metabolism (GO:0019538)
A0A0A0MRR7	SNRPC	U1 small nuclear ribonucleoprotein C (U1 snRNP C) (U1-C) (U1C)	2	4	0.824975	-0.277577	0.761372	-0.393327	-0.810687	0.251595	0.0424929		0.591697	1	11.6667	P09234	Regulation of nucleobase, nucleoside, nucleotide and nucleic acid metabolism (GO:0019219)
A0A087WY00	MYO5A	Unconventional myosin-Va	2	2	0.826703	-0.274559	0.762966	-0.390309	-0.804963	0.254958	0.042847		0.595042	0.9999	0.601751	E7ERV5 F8W6H6 F8WE88 G3V394 O95317 Q9UES5 Q9Y4I1	Cell growth and/or maintenance (GO:0008151)
Q9UPY6	WASF3	Wiskott-Aldrich syndrome protein family member 3 (WASP family protein member 3) (Protein WAVE-3) (Verprolin homology domain-containing protein 3)	5	8	0.827461	-0.273236	0.763666	-0.388986	-0.802455	0.256441	0.0429178		0.596065	1	8.96414	null	Cell growth and/or maintenance (GO:0008151)
I3L0T4	ACOX1	Peroxisomal acyl-coenzyme A oxidase 1	2	3	0.82755	-0.273081	0.763748	-0.388831	-0.802161	0.256615	0.0429887		0.596065	0.9998	9.86547	I3L2U4 K7ELT1 Q15067	Metabolism (GO:0008152); Energy pathways (GO:0006091)
H3BT58	COTL1	Coactosin-like protein	3	4	0.827574	-0.273039	0.76377	-0.388789	-0.802082	0.256663	0.0430595		0.596065	1	27.3973	Q14019	Cell growth and/or maintenance (GO:0008151)
O95182	NDUFA7	NADH dehydrogenase [ubiquinone] 1 alpha subcomplex subunit 7 (Complex I-B14.5a) (CI-B14.5a) (NADH-ubiquinone oxidoreductase subunit B14.5a)	11	25	0.828215	-0.271923	0.764362	-0.387673	-0.799965	0.25792	0.0431303		0.597784	1	67.2566	null	Metabolism (GO:0008152); Energy pathways (GO:0006091)
P69905	"HBA1;"	Hemoglobin subunit alpha (Alpha-globin) (Hemoglobin alpha chain)	37	273	0.829888	-0.269012	0.765905	-0.384762	-0.794445	0.261219	0.0434136		0.601029	1	78.169	null	Transport (GO:0006810)
E9PDU6	CNN3	Calponin (Fragment)	3	4	0.829956	-0.268894	0.765968	-0.384644	-0.794221	0.261354	0.0434844		0.601029	1	7.56757	Q15417	Cell growth and/or maintenance (GO:0008151)
P52565	ARHGDIA	Rho GDP-dissociation inhibitor 1 (Rho GDI 1) (Rho-GDI alpha)	12	27	0.83124	-0.266663	0.767154	-0.382413	-0.78999	0.263903	0.0436969		0.60394	1	32.3529	null	Cell growth and/or maintenance (GO:0008151)
Q9Y6R1	SLC4A4	Electrogenic sodium bicarbonate cotransporter 1 (Sodium bicarbonate cotransporter) (Na(+)/HCO3(-) cotransporter) (Solute carrier family 4 member 4) (kNBC1)	11	24	0.832264	-0.264887	0.768098	-0.380637	-0.786623	0.265944	0.0438385		0.606643	1	11.1214	null	Transport (GO:0006810)
Q9UJC5	SH3BGRL2	SH3 domain-binding glutamic acid-rich-like protein 2 (Fovea-associated SH3 domain-binding protein)	2	4	0.832802	-0.263954	0.768595	-0.379704	-0.784853	0.267021	0.0439802		0.606736	1	13.0841	null	Biological_process unknown (GO:0000004)
P09960	LTA4H	Leukotriene A-4 hydrolase (LTA-4 hydrolase) (EC 3.3.2.6) (Leukotriene A(4) hydrolase)	3	3	0.83307	-0.263491	0.768842	-0.379241	-0.783975	0.267556	0.044051		0.606736	1	5.23732	null	Protein metabolism (GO:0019538)
P00441	SOD1	Superoxide dismutase [Cu-Zn] (EC 1.15.1.1) (Superoxide dismutase 1) (hSod1)	10	20	0.833244	-0.26319	0.769003	-0.37894	-0.783404	0.267905	0.0441218		0.606736	1	54.5455	null	Metabolism (GO:0008152); Energy pathways (GO:0006091)
Q96HN2	AHCYL2	Adenosylhomocysteinase 3 (AdoHcyase 3) (EC 3.3.1.1) (IP(3)Rs binding protein released with IP(3) 2) (IRBIT2) (Long-IRBIT) (S-adenosyl-L-homocysteine hydrolase 3) (S-adenosylhomocysteine hydrolase-like protein 2)	7	18	0.833357	-0.262993	0.769107	-0.378743	-0.783031	0.268133	0.0441926		0.606736	1	8.6743	null	Metabolism (GO:0008152)
P17600	SYN1	Synapsin-1 (Brain protein 4.1) (Synapsin I)	67	231	0.834243	-0.261461	0.769925	-0.377211	-0.780126	0.269912	0.0442635		0.609786	1	66.383	null	Transport (GO:0006810)
Q9C0B5	ZDHHC5	Palmitoyltransferase ZDHHC5 (EC 2.3.1.225) (Zinc finger DHHC domain-containing protein 5) (DHHC-5) (Zinc finger protein 375)	1	1	0.836911	-0.256854	0.772387	-0.372604	-0.77139	0.275313	0.0446176		0.615129	0.9528	4.1958	null	Biological_process unknown (GO:0000004)
P58546	MTPN	Myotrophin (Protein V-1)	7	17	0.837063	-0.256591	0.772528	-0.372341	-0.770892	0.275623	0.0447592		0.615129	1	36.4407	null	Protein metabolism (GO:0019538)
E5RGX5	STMN2	Stathmin	7	15	0.838514	-0.254093	0.773867	-0.369843	-0.766154	0.278585	0.0451133		0.617522	1	16.0714	Q93045	Cell communication (GO:0007154); Signal transduction (GO:0007165)
G3V0I5	NDUFV1	NADH dehydrogenase [ubiquinone] flavoprotein 1, mitochondrial (EC 1.6.5.3) (EC 1.6.99.3)	10	14	0.840553	-0.250589	0.775748	-0.366339	-0.75951	0.282774	0.0451841		0.625825	1	15.9737	P49821	Metabolism (GO:0008152); Energy pathways (GO:0006091)
O15067	PFAS	Phosphoribosylformylglycinamidine synthase (FGAM synthase) (FGAMS) (EC 6.3.5.3) (Formylglycinamide ribonucleotide amidotransferase) (FGAR amidotransferase) (FGAR-AT) (Formylglycinamide ribotide amidotransferase)	2	3	0.840924	-0.249953	0.776091	-0.365703	-0.758304	0.283539	0.045255		0.626537	0.9999	2.54111	null	Metabolism (GO:0008152); Energy pathways (GO:0006091)
P48634	PRRC2A	Protein PRRC2A (HLA-B-associated transcript 2) (Large proline-rich protein BAT2) (Proline-rich and coiled-coil-containing protein 2A) (Protein G2)	2	3	0.841418	-0.249105	0.776547	-0.364855	-0.756695	0.284562	0.0453258		0.627148	1	1.25174	null	Biological_process unknown (GO:0000004)
P40939	HADHA	Trifunctional enzyme subunit alpha, mitochondrial (78 kDa gastrin-binding protein) (TP-alpha) [Includes: Long-chain enoyl-CoA hydratase (EC 4.2.1.17); Long chain 3-hydroxyacyl-CoA dehydrogenase (EC 1.1.1.211)]	1	1	0.841487	-0.248986	0.776611	-0.364736	-0.756471	0.284705	0.0453966		0.627148	0.92	2.75229	null	Metabolism (GO:0008152); Energy pathways (GO:0006091)
M0QXK2	SNRPA	U1 small nuclear ribonucleoprotein A (Fragment)	1	2	0.841898	-0.248283	0.776989	-0.364033	-0.755137	0.285554	0.0454674		0.627148	0.9463	6.25	M0QZG7 M0R221 M0R268 M0R2B8 P09012	Regulation of nucleobase, nucleoside, nucleotide and nucleic acid metabolism (GO:0019219)
Q9NRV9	HEBP1	Heme-binding protein 1 (p22HBP)	7	13	0.844314	-0.244148	0.77922	-0.359898	-0.747295	0.290587	0.0457507		0.632885	1	32.2751	null	Biological_process unknown (GO:0000004)
J3KS22	DCXR	L-xylulose reductase (Fragment)	6	10	0.844476	-0.243872	0.779369	-0.359622	-0.746772	0.290925	0.0458924		0.632885	1	23.7668	J3QS36 Q7Z4W1	Metabolism (GO:0008152); Energy pathways (GO:0006091)
C9JFR7	CYCS	Cytochrome c (Fragment)	7	12	0.844842	-0.243247	0.779706	-0.358997	-0.745587	0.291691	0.0459632		0.632885	1	42.5743	P99999	Metabolism (GO:0008152); Energy pathways (GO:0006091)
P23526	AHCY	Adenosylhomocysteinase (AdoHcyase) (EC 3.3.1.1) (S-adenosyl-L-homocysteine hydrolase)	1	2	0.844854	-0.243226	0.779718	-0.358976	-0.745547	0.291717	0.046034		0.632885	0.9701	2.5463	null	Metabolism (GO:0008152); Energy pathways (GO:0006091)
P31689	DNAJA1	DnaJ homolog subfamily A member 1 (DnaJ protein homolog 2) (HSDJ) (Heat shock 40 kDa protein 4) (Heat shock protein J2) (HSJ-2) (Human DnaJ protein 2) (hDj-2)	2	3	0.845103	-0.242801	0.779947	-0.358551	-0.744742	0.292238	0.0461756		0.632885	0.9996	7.0529	null	Protein metabolism (GO:0019538)
Q86UP2	KTN1	Kinectin (CG-1 antigen) (Kinesin receptor)	16	24	0.846237	-0.240866	0.780995	-0.356616	-0.741071	0.294624	0.0463881		0.635128	1	13.7804	null	Cell growth and/or maintenance (GO:0008151)
Q9Y6V0	PCLO	Protein piccolo (Aczonin)	36	57	0.846943	-0.239663	0.781646	-0.355413	-0.738791	0.296112	0.0465297		0.635445	1	7.1076	null	Synaptic vesicle transport (GO:0016181)
P49840	GSK3A	Glycogen synthase kinase-3 alpha (GSK-3 alpha) (EC 2.7.11.26) (Serine/threonine-protein kinase GSK3A) (EC 2.7.11.1)	2	4	0.848212	-0.237503	0.782817	-0.353253	-0.734695	0.298798	0.0467422		0.635445	1	6.62526	null	Cell communication (GO:0007154); Signal transduction (GO:0007165)
A0A0C4DGB5	CAST	Calpastatin	4	4	0.848615	-0.236818	0.783189	-0.352568	-0.733396	0.299653	0.0469547		0.635445	1	3.97878	F8W7E0	Protein metabolism (GO:0019538)
O75306	NDUFS2	NADH dehydrogenase [ubiquinone] iron-sulfur protein 2, mitochondrial (EC 1.6.5.3) (EC 1.6.99.3) (Complex I-49kD) (CI-49kD) (NADH-ubiquinone oxidoreductase 49 kDa subunit)	2	3	0.849402	-0.235481	0.783915	-0.351231	-0.73086	0.301327	0.047238		0.635445	1	6.91145	null	Metabolism (GO:0008152); Energy pathways (GO:0006091)
P43304	GPD2	Glycerol-3-phosphate dehydrogenase, mitochondrial (GPD-M) (GPDH-M) (EC 1.1.5.3) (mtGPD)	17	36	0.850095	-0.234304	0.784555	-0.350054	-0.728628	0.302806	0.0473088		0.635445	1	28.1981	null	Metabolism (GO:0008152); Energy pathways (GO:0006091)
J3KP15	SRSF2	Serine/arginine-rich-splicing factor 2 (Fragment)	2	3	0.850294	-0.233966	0.784739	-0.349716	-0.727987	0.303231	0.0473796		0.635445	1	12.782	J3QL05 Q01130	Regulation of nucleobase, nucleoside, nucleotide and nucleic acid metabolism (GO:0019219)
Q9H492	MAP1LC3A	Microtubule-associated proteins 1A/1B light chain 3A (Autophagy-related protein LC3 A) (Autophagy-related ubiquitin-like modifier LC3 A) (MAP1 light chain 3-like protein 1) (MAP1A/MAP1B light chain 3 A) (MAP1A/MAP1B LC3 A) (Microtubule-associated protein	5	9	0.850628	-0.233399	0.785047	-0.349149	-0.726913	0.303945	0.0474504		0.635445	1	29.7521	null	Microtubule-based process (GO:0007017)
Q16798	ME3	NADP-dependent malic enzyme, mitochondrial (NADP-ME) (EC 1.1.1.40) (Malic enzyme 3)	2	3	0.851049	-0.232685	0.785435	-0.348435	-0.725559	0.304847	0.0476629		0.635445	1	3.31126	null	Metabolism (GO:0008152); Energy pathways (GO:0006091)
P08621	SNRNP70	U1 small nuclear ribonucleoprotein 70 kDa (U1 snRNP 70 kDa) (U1-70K) (snRNP70)	2	2	0.851223	-0.232391	0.785596	-0.348141	-0.725001	0.305219	0.0477337		0.635445	0.9969	3.89016	null	Regulation of nucleobase, nucleoside, nucleotide and nucleic acid metabolism (GO:0019219)
P78352	DLG4	Disks large homolog 4 (Postsynaptic density protein 95) (PSD-95) (Synapse-associated protein 90) (SAP-90) (SAP90)	7	10	0.85228	-0.2306	0.786572	-0.34635	-0.721604	0.30749	0.048017		0.635445	1	12.0166	null	Cell communication (GO:0007154)
F5GX11	PSMA1	Proteasome endopeptidase complex (EC 3.4.25.1)	4	5	0.852318	-0.230537	0.786606	-0.346287	-0.721485	0.307571	0.0480878		0.635445	1	11.3445	P25786	Protein metabolism (GO:0019538)
A0A0B4J2C3	TPT1	Translationally-controlled tumor protein (Tumor protein, translationally-controlled 1, isoform CRA_d)	1	2	0.852327	-0.230522	0.786614	-0.346272	-0.721456	0.30759	0.0481586		0.635445	0.9709	7.1066	P13693 Q5W0H4	Cell growth and/or maintenance (GO:0008151)
A0A0A0MRM9	NOLC1	Nucleolar and coiled-body phosphoprotein 1 (Fragment)	3	3	0.852341	-0.230497	0.786628	-0.346247	-0.721409	0.307621	0.0482295		0.635445	1	4.51977	Q14978	Regulation of nucleobase, nucleoside, nucleotide and nucleic acid metabolism (GO:0019219)
P20962	PTMS	Parathymosin	9	33	0.852441	-0.230327	0.78672	-0.346077	-0.721088	0.307837	0.0483003		0.635445	1	28.4314	null	Regulation of nucleobase, nucleoside, nucleotide and nucleic acid metabolism (GO:0019219)
P31930	UQCRC1	Cytochrome b-c1 complex subunit 1, mitochondrial (Complex III subunit 1) (Core protein I) (Ubiquinol-cytochrome-c reductase complex core protein 1)	12	31	0.852589	-0.230078	0.786856	-0.345828	-0.720615	0.308154	0.0484419		0.635445	1	15.625	null	Metabolism (GO:0008152); Energy pathways (GO:0006091)
P22392	NME2	Nucleoside diphosphate kinase B (NDK B) (NDP kinase B) (EC 2.7.4.6) (C-myc purine-binding transcription factor PUF) (Histidine protein kinase NDKB) (EC 2.7.13.3) (nm23-H2)	11	34	0.85315	-0.229128	0.787374	-0.344878	-0.718814	0.309365	0.0486544		0.635842	1	50	Q32Q12	Signal transduction (GO:0007165); Regulation of nucleobase, nucleoside, nucleotide and nucleic acid metabolism (GO:0019219)
I3L3B0	C1QBP	Complement component 1 Q subcomponent-binding protein, mitochondrial (Complement component 1, q subcomponent binding protein, isoform CRA_a)	2	6	0.853442	-0.228635	0.787644	-0.344385	-0.717879	0.309995	0.0487252		0.63621	1	8.42697	I3L3Q7 Q07021	Immune response (GO:0006955)
P07954	FH	Fumarate hydratase, mitochondrial (Fumarase) (EC 4.2.1.2)	18	40	0.855426	-0.225286	0.789474	-0.341036	-0.711527	0.314295	0.0490793		0.640382	1	31.7647	null	Metabolism (GO:0008152); Energy pathways (GO:0006091)
Q02790	FKBP4	Peptidyl-prolyl cis-trans isomerase FKBP4 (PPIase FKBP4) (EC 5.2.1.8) (51 kDa FK506-binding protein) (FKBP51) (52 kDa FK506-binding protein) (52 kDa FKBP) (FKBP-52) (59 kDa immunophilin) (p59) (FK506-binding protein 4) (FKBP-4) (FKBP59) (HSP-binding immun	9	14	0.855793	-0.224667	0.789813	-0.340417	-0.710354	0.315093	0.0491501		0.640735	1	12.6362	null	Metabolism (GO:0008152); Energy pathways (GO:0006091)
F5GX23	PSMD9	26S proteasome non-ATPase regulatory subunit 9	2	3	0.855922	-0.224449	0.789933	-0.340199	-0.70994	0.315376	0.049221		0.640735	1	12.2905	F5H5V4 J3KN29 O00233	Protein metabolism (GO:0019538)
P07195	LDHB	L-lactate dehydrogenase B chain (LDH-B) (EC 1.1.1.27) (LDH heart subunit) (LDH-H) (Renal carcinoma antigen NY-REN-46)	20	49	0.856757	-0.223041	0.790703	-0.338791	-0.707271	0.317198	0.0492918		0.642102	1	32.9341	null	Metabolism (GO:0008152); Energy pathways (GO:0006091)
B7ZAP0	RABGAP1L	Rab GTPase-activating protein 1-like, isoform 10	2	3	0.856822	-0.222932	0.790763	-0.338682	-0.707064	0.31734	0.0493626		0.642102	1	8.3004	F5H8L0	Biological_process unknown (GO:0000004)
B4DLN1		cDNA FLJ60124, highly similar to Mitochondrial dicarboxylate carrier	5	6	0.856856	-0.222875	0.790794	-0.338625	-0.706957	0.317413	0.0494334		0.642102	1	12.6697	P52815	transport [GO:0006810]
P12270	TPR	Nucleoprotein TPR (Megator) (NPC-associated intranuclear protein) (Translocated promoter region protein)	4	5	0.857371	-0.222009	0.791269	-0.337759	-0.705314	0.318539	0.0495042		0.643458	1	2.58146	null	Regulation of nucleobase, nucleoside, nucleotide and nucleic acid metabolism (GO:0019219)
P43487	RANBP1	Ran-specific GTPase-activating protein (Ran-binding protein 1) (RanBP1)	5	6	0.859149	-0.219019	0.792911	-0.334769	-0.699645	0.322445	0.0497167		0.647349	1	32.3383	null	Cell communication (GO:0007154); Signal transduction (GO:0007165)
K7ESF5	SLC44A2	Choline transporter-like protein 2 (Fragment)	2	2	0.860084	-0.21745	0.793774	-0.3332	-0.696669	0.324507	0.0499292		0.649934	0.9983	5.29412	Q8IWA5	Cell communication (GO:0007154); Signal transduction (GO:0007165)
Q6P587	FAHD1	Acylpyruvase FAHD1, mitochondrial (EC 3.7.1.5) (Fumarylacetoacetate hydrolase domain-containing protein 1) (FAH domain-containing protein 1) (Oxaloacetate decarboxylase) (OAA decarboxylase) (EC 4.1.1.3) (YisK-like protein)	3	4	0.860495	-0.216761	0.794153	-0.332511	-0.695361	0.325416	0.05		0.650711	1	20.0893	null	Biological_process unknown (GO:0000004)
Q9H0L4	CSTF2T	Cleavage stimulation factor subunit 2 tau variant (CF-1 64 kDa subunit tau variant) (Cleavage stimulation factor 64 kDa subunit tau variant) (CSTF 64 kDa subunit tau variant) (TauCstF-64)	4	4	0.86264	-0.21317	0.796132	-0.32892	-0.688553	0.330175	0.0504958		0.653867	1	10.5519	null	Regulation of nucleobase, nucleoside, nucleotide and nucleic acid metabolism (GO:0019219)
Q03113	GNA12	Guanine nucleotide-binding protein subunit alpha-12 (G alpha-12) (G-protein subunit alpha-12)	2	7	0.863317	-0.212037	0.796758	-0.327787	-0.686405	0.331686	0.0507082		0.654108	1	2.88714	Q14344	Cell communication (GO:0007154); Signal transduction (GO:0007165)
P21333	FLNA	Filamin-A (FLN-A) (Actin-binding protein 280) (ABP-280) (Alpha-filamin) (Endothelial actin-binding protein) (Filamin-1) (Non-muscle filamin)	14	23	0.865588	-0.208248	0.798853	-0.323998	-0.679219	0.336773	0.0510623		0.659533	1	6.72459	Q5HY54	Cell growth and/or maintenance (GO:0008151)
O14818	PSMA7	Proteasome subunit alpha type-7 (EC 3.4.25.1) (Proteasome subunit RC6-1) (Proteasome subunit XAPC7)	4	5	0.866488	-0.206748	0.799684	-0.322498	-0.676375	0.3388	0.0511331		0.662121	1	14.9194	Q8TAA3	Protein metabolism (GO:0019538)
Q9Y266	NUDC	Nuclear migration protein nudC (Nuclear distribution protein C homolog)	7	14	0.866666	-0.206451	0.799849	-0.322201	-0.675812	0.339202	0.051204		0.662121	1	18.7311	null	Cell communication (GO:0007154); Signal transduction (GO:0007165)
F6SFB5	AP1S2	AP-1 complex subunit sigma-2	1	2	0.867047	-0.205817	0.8002	-0.321567	-0.67461	0.340062	0.0512748		0.662121	0.9709	11.875	null	Transport (GO:0006810)
H0YBC7	BNIP3L	BCL2/adenovirus E1B 19 kDa protein-interacting protein 3-like (Fragment)	1	2	0.867214	-0.20554	0.800354	-0.32129	-0.674084	0.340439	0.0514164		0.662121	0.947	8.10811	O60238	Apoptosis (GO:0006915)
Q9BW30	TPPP3	Tubulin polymerization-promoting protein family member 3 (TPPP/p20)	8	13	0.870521	-0.200049	0.803406	-0.315799	-0.663671	0.34795	0.0517705		0.672101	1	28.4091	null	Biological_process unknown (GO:0000004)
F8VP47	RPH3A	Rabphilin-3A	4	7	0.871442	-0.198524	0.804256	-0.314274	-0.660779	0.350055	0.0519122		0.673542	1	9.76744	Q9Y2J0	Transport (GO:0006810)
H7BYX6	NCAM1	Neural cell adhesion molecule 1	41	99	0.87172	-0.198063	0.804513	-0.313813	-0.659905	0.350693	0.0520538		0.673542	1	33.3793	null	Cell communication (GO:0007154); Signal transduction (GO:0007165)
F5GXC5	ITFG1	T-cell immunomodulatory protein	2	3	0.871996	-0.197607	0.804767	-0.313357	-0.65904	0.351324	0.0521246		0.673542	1	4.09483	H3BUJ1 Q8TB96	Immune response (GO:0006955)
P16189	HLA-A	HLA class I histocompatibility antigen, A-31 alpha chain (MHC class I antigen A*31)	3	5	0.873686	-0.194813	0.806327	-0.310563	-0.653742	0.35521	0.0524079		0.676791	1	12.3288	P16190	Immune response (GO:0006955)
J3KNA1	KIF5A	Kinesin-like protein	7	10	0.873931	-0.194408	0.806553	-0.310158	-0.652975	0.355775	0.0524788		0.676791	0.9999	4.34783	Q12840	Transport (GO:0006810)
Q02410	APBA1	Amyloid beta A4 precursor protein-binding family A member 1 (Adapter protein X11alpha) (Neuron-specific X11 protein) (Neuronal Munc18-1-interacting protein 1) (Mint-1)	1	2	0.874512	-0.19345	0.807089	-0.3092	-0.651158	0.357115	0.0526204		0.676791	0.9716	1.55317	null	Cell communication (GO:0007154); Signal transduction (GO:0007165)
O95167	NDUFA3	NADH dehydrogenase [ubiquinone] 1 alpha subcomplex subunit 3 (Complex I-B9) (CI-B9) (NADH-ubiquinone oxidoreductase B9 subunit)	2	4	0.874768	-0.193027	0.807326	-0.308777	-0.650356	0.357708	0.052762		0.676791	1	41.6667	Q6FGG4 S4R3I5	Metabolism (GO:0008152); Energy pathways (GO:0006091)
P62318	SNRPD3	Small nuclear ribonucleoprotein Sm D3 (Sm-D3) (snRNP core protein D3)	2	4	0.874929	-0.192761	0.807475	-0.308511	-0.649852	0.35808	0.0528329		0.676791	1	8.73016	null	Regulation of nucleobase, nucleoside, nucleotide and nucleic acid metabolism (GO:0019219)
E9PN51	NDUFS8	NADH dehydrogenase [ubiquinone] iron-sulfur protein 8, mitochondrial (Fragment)	3	5	0.875249	-0.192234	0.807769	-0.307984	-0.648853	0.35882	0.0529745		0.676791	1	18.1818	E9PPW7 F8W9K7 O00217	Metabolism (GO:0008152); Energy pathways (GO:0006091)
P61088	UBE2N	Ubiquitin-conjugating enzyme E2 N (EC 2.3.2.23) (Bendless-like ubiquitin-conjugating enzyme) (E2 ubiquitin-conjugating enzyme N) (Ubc13) (UbcH13) (Ubiquitin carrier protein N) (Ubiquitin-protein ligase N)	15	28	0.87533	-0.192102	0.807844	-0.307852	-0.648601	0.359006	0.0530453		0.676791	1	61.1842	null	Protein metabolism (GO:0019538)
Q04837	SSBP1	Single-stranded DNA-binding protein, mitochondrial (Mt-SSB) (MtSSB) (PWP1-interacting protein 17)	6	10	0.875881	-0.191194	0.808352	-0.306944	-0.64688	0.360283	0.0531161		0.677874	1	29.7297	null	Regulation of nucleobase, nucleoside, nucleotide and nucleic acid metabolism (GO:0019219)
P46976	GYG1	Glycogenin-1 (GN-1) (GN1) (EC 2.4.1.186)	4	7	0.876329	-0.190455	0.808767	-0.306205	-0.645478	0.361325	0.053187		0.677874	1	8.85714	null	Metabolism (GO:0008152); Energy pathways (GO:0006091)
Q8N6N7	ACBD7	Acyl-CoA-binding domain-containing protein 7	5	14	0.876645	-0.189936	0.809058	-0.305686	-0.644493	0.362058	0.0533994		0.677874	1	42.0455	null	Biological_process unknown (GO:0000004)
P39687	ANP32A	Acidic leucine-rich nuclear phosphoprotein 32 family member A (Acidic nuclear phosphoprotein pp32) (pp32) (Leucine-rich acidic nuclear protein) (LANP) (Mapmodulin) (Potent heat-stable protein phosphatase 2A inhibitor I1PP2A) (Putative HLA-DR-associated pr	14	36	0.878908	-0.186216	0.811146	-0.301966	-0.637439	0.367336	0.0538244		0.682471	1	25.7028	null	Immune response (GO:0006955)
E9PHM6	DST	Dystonin	2	3	0.879275	-0.185613	0.811485	-0.301363	-0.636296	0.368195	0.0538952		0.682935	1	0.272876	F6QMI7 F8W9J4 H0YC82 Q03001	Cell growth and/or maintenance (GO:0008151)
Q13303	KCNAB2	Voltage-gated potassium channel subunit beta-2 (EC 1.1.1.-) (K(+) channel subunit beta-2) (Kv-beta-2) (hKvbeta2)	2	2	0.879428	-0.185362	0.811626	-0.301112	-0.635821	0.368553	0.053966		0.682935	1	5.44959	null	Transport (GO:0006810)
Q04917	YWHAH	14-3-3 protein eta (Protein AS1)	20	42	0.879863	-0.184649	0.812028	-0.300399	-0.634468	0.369573	0.0540368		0.683653	1	38.2114	null	Cell communication (GO:0007154); Signal transduction (GO:0007165)
P11166	SLC2A1	Solute carrier family 2, facilitated glucose transporter member 1 (Glucose transporter type 1, erythrocyte/brain) (GLUT-1) (HepG2 glucose transporter)	4	5	0.880968	-0.182838	0.813048	-0.298588	-0.631035	0.372169	0.0542493		0.683752	1	10.3659	null	Transport (GO:0006810)
Q92688	ANP32B	Acidic leucine-rich nuclear phosphoprotein 32 family member B (Acidic protein rich in leucines) (Putative HLA-DR-associated protein I-2) (PHAPI2) (Silver-stainable protein SSP29)	4	8	0.881124	-0.182583	0.813192	-0.298333	-0.63055	0.372536	0.0543909		0.683752	1	3.98406	null	Biological_process unknown (GO:0000004)
B7Z2R7	ACBD5	Acyl-CoA-binding domain-containing protein 5	1	1	0.881193	-0.18247	0.813255	-0.29822	-0.630337	0.372698	0.0544618		0.683752	0.97	3.25048	Q5T8D3 Q5T8E0 X6RDD7	Biological_process unknown (GO:0000004)
Q99747	NAPG	Gamma-soluble NSF attachment protein (SNAP-gamma) (N-ethylmaleimide-sensitive factor attachment protein gamma)	19	34	0.882634	-0.180113	0.814585	-0.295863	-0.625867	0.376098	0.0546742		0.687889	1	40.7051	null	Transport (GO:0006810)
A6NKN8	PCP4L1	Purkinje cell protein 4-like protein 1 (PCP4-like protein 1)	5	10	0.883067	-0.179406	0.814984	-0.295156	-0.624526	0.377121	0.0548159		0.687978	1	35.2941	null	Biological_process unknown (GO:0000004)
O95202	LETM1	Mitochondrial proton/calcium exchanger protein (Leucine zipper-EF-hand-containing transmembrane protein 1)	6	11	0.883483	-0.178726	0.815368	-0.294476	-0.623238	0.378106	0.0548867		0.688885	1	7.71313	null	Cell communication (GO:0007154); Signal transduction (GO:0007165)
F5GWE5	PITPNA	Phosphatidylinositol transfer protein alpha isoform	5	9	0.884094	-0.177728	0.815933	-0.293478	-0.621345	0.379556	0.0549575		0.690636	1	17.7778	Q00169	Transport (GO:0006810)
A0A087X165	SRCIN1	SRC kinase-signaling inhibitor 1	20	36	0.884894	-0.176424	0.816671	-0.292174	-0.618871	0.381456	0.0550992		0.692235	1	15.9408	Q9C0H9	Cell communication (GO:0007154); Signal transduction (GO:0007165)
A6NP52	PRAF2	PRA1 family protein	1	1	0.885698	-0.175112	0.817413	-0.290862	-0.616385	0.383372	0.0552408		0.692235	0.9705	6.875	O60831	Biological_process unknown (GO:0000004)
Q12846	STX4	Syntaxin-4 (Renal carcinoma antigen NY-REN-31)	6	9	0.886485	-0.173831	0.81814	-0.289581	-0.613955	0.38525	0.0555241		0.692235	1	18.5185	null	Cell communication (GO:0007154); Signal transduction (GO:0007165)
Q96AB3	ISOC2	Isochorismatase domain-containing protein 2	2	4	0.888009	-0.171354	0.819546	-0.287104	-0.609257	0.388897	0.0558074		0.696672	1	11.2195	null	Metabolism (GO:0008152); Energy pathways (GO:0006091)
C9JQS9	PCCB	Propionyl-CoA carboxylase beta chain, mitochondrial	6	10	0.888172	-0.171089	0.819696	-0.286839	-0.608755	0.389288	0.0558782		0.696672	1	11.2701	E7ETT1 E7ETT4 E7EUY3 E7EX59 E9PDR0 P05166	Metabolism (GO:0008152); Energy pathways (GO:0006091)
P48047	ATP5O	ATP synthase subunit O, mitochondrial (Oligomycin sensitivity conferral protein) (OSCP)	15	26	0.891618	-0.165502	0.822877	-0.281252	-0.59816	0.397594	0.0563739		0.705279	1	39.4366	null	Metabolism (GO:0008152); Energy pathways (GO:0006091)
P49588	AARS	Alanine--tRNA ligase, cytoplasmic (EC 6.1.1.7) (Alanyl-tRNA synthetase) (AlaRS) (Renal carcinoma antigen NY-REN-42)	3	5	0.891855	-0.165119	0.823095	-0.280869	-0.597435	0.398166	0.0564448		0.705315	1	3.5124	null	Protein metabolism (GO:0019538); Translation (GO:0043037)
P41250	GARS	Glycine--tRNA ligase (EC 3.6.1.17) (EC 6.1.1.14) (Diadenosine tetraphosphate synthetase) (AP-4-A synthetase) (Glycyl-tRNA synthetase) (GlyRS)	1	2	0.892245	-0.164488	0.823455	-0.280238	-0.596238	0.399112	0.0565864		0.705315	0.9648	2.16509	null	Protein metabolism (GO:0019538)
P55081	MFAP1	Microfibrillar-associated protein 1	2	3	0.893924	-0.161775	0.825005	-0.277525	-0.591093	0.403193	0.0568697		0.708977	1	4.55581	null	Cell growth and/or maintenance (GO:0008151)
P51513	NOVA1	RNA-binding protein Nova-1 (Neuro-oncological ventral antigen 1) (Onconeural ventral antigen 1) (Paraneoplastic Ri antigen) (Ventral neuron-specific protein 1)	6	9	0.894558	-0.160753	0.82559	-0.276503	-0.589154	0.404737	0.0569405		0.710667	1	16.4706	null	Regulation of nucleobase, nucleoside, nucleotide and nucleic acid metabolism (GO:0019219)
B5MD38	HADHB	Trifunctional enzyme subunit beta, mitochondrial	4	6	0.895019	-0.16001	0.826015	-0.27576	-0.587745	0.405862	0.0570822		0.711014	1	7.97721	C9JE81 C9JEY0 C9K0M0 P55084	Metabolism (GO:0008152); Energy pathways (GO:0006091)
P07305	H1F0	Histone H1.0 (Histone H1') (Histone H1(0)) [Cleaved into: Histone H1.0, N-terminally processed]	3	3	0.895962	-0.158491	0.826885	-0.274241	-0.584866	0.408166	0.057153		0.71319	1	11.3402	null	Regulation of nucleobase, nucleoside, nucleotide and nucleic acid metabolism (GO:0019219)
F2Z2W6	HMGN1	Non-histone chromosomal protein HMG-14	2	7	0.896912	-0.156961	0.827763	-0.272711	-0.581964	0.410496	0.0574363		0.71319	1	29.5455	F2Z2Y5 H7BXJ5 P05114	Regulation of nucleobase, nucleoside, nucleotide and nucleic acid metabolism (GO:0019219)
F5GYU9	PLEKHB1	Pleckstrin homology domain-containing family B member 1	1	1	0.89703	-0.156771	0.827872	-0.272521	-0.581604	0.410785	0.0575779		0.71319	0.9219	8.69565	F5GZ38 F5GZH3 F5H1B8 F5H3M1 F5H866	Cell communication (GO:0007154); Signal transduction (GO:0007165)
P40926	MDH2	Malate dehydrogenase, mitochondrial (EC 1.1.1.37)	40	113	0.898254	-0.154805	0.829	-0.270555	-0.577877	0.413791	0.0577195		0.716899	1	50	null	Metabolism (GO:0008152); Energy pathways (GO:0006091)
Q8N300	SVBP	Small vasohibin-binding protein (Coiled coil domain-containing protein 23)	2	2	0.898777	-0.153965	0.829484	-0.269715	-0.576283	0.41508	0.0577904		0.718251	0.9985	15.1515	null	Biological_process unknown (GO:0000004)
K7EQX8	MXRA7	Matrix-remodeling-associated protein 7	2	4	0.8992	-0.153286	0.829874	-0.269036	-0.574995	0.416123	0.0578612		0.719175	1	100	Q6ZR64	Biological_process unknown (GO:0000004)
P78318	IGBP1	Immunoglobulin-binding protein 1 (B-cell signal transduction molecule alpha 4) (Protein alpha-4) (CD79a-binding protein 1) (Protein phosphatase 2/4/6 regulatory subunit) (Renal carcinoma antigen NY-REN-16)	3	4	0.900352	-0.151439	0.830937	-0.267189	-0.571492	0.418968	0.057932		0.720107	1	11.2094	null	Cell communication (GO:0007154); Signal transduction (GO:0007165)
H0YHG0		Uncharacterized protein (Fragment)	12	18	0.900462	-0.151263	0.831038	-0.267013	-0.57116	0.419239	0.0580028		0.720107	1	13.9579	P82979
Q9Y5L4	TIMM13	Mitochondrial import inner membrane translocase subunit Tim13	1	3	0.90073	-0.150834	0.831286	-0.266584	-0.570345	0.419903	0.0580737		0.720107	1	14.7368	null	Transport (GO:0006810)
A0A0C4DGV3	NADK2	NAD kinase 2, mitochondrial	1	2	0.901127	-0.150198	0.831652	-0.265948	-0.56914	0.420886	0.0581445		0.720107	0.971	6.07287	B7Z8V7 Q4G0N4	Metabolism (GO:0008152)
O43865	AHCYL1	S-adenosylhomocysteine hydrolase-like protein 1 (DC-expressed AHCY-like molecule) (IP(3)Rs binding protein released with IP(3)) (IRBIT) (Putative adenosylhomocysteinase 2) (S-adenosyl-L-homocysteine hydrolase 2) (AdoHcyase 2)	11	25	0.901775	-0.149161	0.83225	-0.264911	-0.567173	0.422493	0.0585694		0.720107	1	15.6604	null	Metabolism (GO:0008152); Energy pathways (GO:0006091)
Q9UBQ7	GRHPR	Glyoxylate reductase/hydroxypyruvate reductase (EC 1.1.1.79) (EC 1.1.1.81)	2	3	0.902741	-0.147616	0.833142	-0.263366	-0.564243	0.424893	0.0589235		0.720107	1	7.31707	U3KQ56	Metabolism (GO:0008152); Energy pathways (GO:0006091)
P50995	ANXA11	Annexin A11 (56 kDa autoantigen) (Annexin XI) (Annexin-11) (Calcyclin-associated annexin 50) (CAP-50)	4	6	0.903175	-0.146923	0.833542	-0.262673	-0.562929	0.425973	0.0590652		0.720107	1	7.12871	null	Signal transduction (GO:0007165); Cell communication (GO:0007154)
O43765	SGTA	Small glutamine-rich tetratricopeptide repeat-containing protein alpha (Alpha-SGT) (Vpu-binding protein) (UBP)	3	5	0.903435	-0.146507	0.833782	-0.262257	-0.562141	0.426621	0.0592068		0.720107	1	8.30671	null	Protein metabolism (GO:0019538)
Q02252	ALDH6A1	Methylmalonate-semialdehyde dehydrogenase [acylating], mitochondrial (MMSDH) (Malonate-semialdehyde dehydrogenase [acylating]) (EC 1.2.1.18) (EC 1.2.1.27) (Aldehyde dehydrogenase family 6 member A1)	7	11	0.903949	-0.145687	0.834257	-0.261437	-0.560585	0.427902	0.0593484		0.721	1	15.7009	null	Metabolism (GO:0008152); Energy pathways (GO:0006091)
O75475	PSIP1	PC4 and SFRS1-interacting protein (CLL-associated antigen KW-7) (Dense fine speckles 70 kDa protein) (DFS 70) (Lens epithelium-derived growth factor) (Transcriptional coactivator p75/p52)	22	37	0.905095	-0.143859	0.835314	-0.259609	-0.55712	0.430763	0.0594901		0.724092	1	33.9623	null	Regulation of nucleobase, nucleoside, nucleotide and nucleic acid metabolism (GO:0019219)
Q13177	PAK2	Serine/threonine-protein kinase PAK 2 (EC 2.7.11.1) (Gamma-PAK) (PAK65) (S6/H4 kinase) (p21-activated kinase 2) (PAK-2) (p58) [Cleaved into: PAK-2p27 (p27); PAK-2p34 (p34) (C-t-PAK2)]	4	6	0.906477	-0.141657	0.83659	-0.257407	-0.552943	0.434226	0.0597025		0.725673	1	9.73282	null	Cell communication (GO:0007154); Signal transduction (GO:0007165)
P46109	CRKL	Crk-like protein	3	3	0.906528	-0.141577	0.836637	-0.257327	-0.552792	0.434352	0.0597734		0.725673	1	13.2013	null	Cell communication (GO:0007154); Signal transduction (GO:0007165)
P30044	PRDX5	Peroxiredoxin-5, mitochondrial (EC 1.11.1.15) (Alu corepressor 1) (Antioxidant enzyme B166) (AOEB166) (Liver tissue 2D-page spot 71B) (PLP) (Peroxiredoxin V) (Prx-V) (Peroxisomal antioxidant enzyme) (TPx type VI) (Thioredoxin peroxidase PMP20) (Thioredoxi	19	52	0.906655	-0.141374	0.836754	-0.257124	-0.552406	0.434673	0.0598442		0.725673	1	38.3178	null	Metabolism (GO:0008152); Energy pathways (GO:0006091)
O60299	LZTS3	Leucine zipper putative tumor suppressor 3 (ProSAP-interacting protein 1) (ProSAPiP1)	3	6	0.906701	-0.141301	0.836797	-0.257051	-0.552269	0.434787	0.059915		0.725673	1	4.60624	null
P25398	RPS12	40S ribosomal protein S12 (Small ribosomal subunit protein eS12)	1	1	0.906977	-0.140862	0.837052	-0.256612	-0.551435	0.435481	0.0599858		0.725973	0.9498	9.84848	null	Protein metabolism (GO:0019538)
G3V4P8	GMFB	Glia maturation factor beta (Fragment)	3	4	0.907989	-0.139253	0.837985	-0.255003	-0.548386	0.438024	0.0601275		0.728492	1	14	P60983	Cell differentiation (GO:0030154); Cell proliferation (GO:0008283)
C9J4W5	EIF5A2	Eukaryotic translation initiation factor 5A (eIF-5A) (Fragment)	3	4	0.912215	-0.132555	0.841885	-0.248305	-0.535683	0.448708	0.0607649		0.737988	1	17.3913	C9J7B5 F8WCJ1 I3L397 I3L504 P63241 Q9GZV4	Protein metabolism (GO:0019538)
B4DJ62	SEPT5	HCG2002594, isoform CRA_a (Septin-5) (cDNA FLJ60582, highly similar to Septin-5)	6	16	0.912402	-0.132258	0.842058	-0.248008	-0.53512	0.449185	0.0608357		0.737988	1	14.2857	G3XAH0 Q99719	Signal transduction (GO:0007165)
A0A087X2G1	DDX1	ATP-dependent RNA helicase DDX1	2	4	0.91445	-0.129023	0.843948	-0.244773	-0.528986	0.4544	0.0613314		0.73922	1	1.97269	F1T0B3 Q92499	Regulation of nucleobase, nucleoside, nucleotide and nucleic acid metabolism (GO:0019219)
Q9BUT1	BDH2	3-hydroxybutyrate dehydrogenase type 2 (EC 1.1.1.-) (EC 1.1.1.30) (Dehydrogenase/reductase SDR family member 6) (Oxidoreductase UCPA) (R-beta-hydroxybutyrate dehydrogenase) (Short chain dehydrogenase/reductase family 15C member 1)	2	2	0.915057	-0.128066	0.844508	-0.243816	-0.527172	0.455949	0.0614023		0.73922	0.9997	14.6939	null	Metabolism (GO:0008152); Energy pathways (GO:0006091)
P30084	ECHS1	Enoyl-CoA hydratase, mitochondrial (EC 4.2.1.17) (Enoyl-CoA hydratase 1) (Short-chain enoyl-CoA hydratase) (SCEH)	8	13	0.915154	-0.127914	0.844598	-0.243664	-0.526882	0.456197	0.0614731		0.73922	1	24.1379	null	Metabolism (GO:0008152); Energy pathways (GO:0006091)
Q96AG4	LRRC59	Leucine-rich repeat-containing protein 59 (Ribosome-binding protein p34) (p34)	6	12	0.915578	-0.127246	0.844989	-0.242996	-0.525616	0.45728	0.0616147		0.73922	1	11.4007	null	Biological_process unknown (GO:0000004)
P49006	MARCKSL1	MARCKS-related protein (MARCKS-like protein 1) (Macrophage myristoylated alanine-rich C kinase substrate) (Mac-MARCKS) (MacMARCKS)	9	30	0.915818	-0.126867	0.845211	-0.242617	-0.524897	0.457896	0.0617564		0.73922	1	42.0513	null	Cell communication (GO:0007154); Signal transduction (GO:0007165)
F5H858	PHACTR2	Phosphatase and actin regulator (Fragment)	2	4	0.915884	-0.126764	0.845271	-0.242513	-0.524701	0.458063	0.061898		0.73922	1	9.03615	F6TH74 J3KP75 O75167	Metabolism (GO:0008152); Energy pathways (GO:0006091)
P68104	EEF1A1	Elongation factor 1-alpha 1 (EF-1-alpha-1) (Elongation factor Tu) (EF-Tu) (Eukaryotic elongation factor 1 A-1) (eEF1A-1) (Leukocyte receptor cluster member 7)	15	38	0.915968	-0.126631	0.845349	-0.242381	-0.524451	0.458278	0.0619688		0.73922	1	20.1299	Q5VTE0	Regulation of cell cycle (GO:0000074)
P10915	HAPLN1	Hyaluronan and proteoglycan link protein 1 (Cartilage-linking protein 1) (Cartilage-link protein) (Proteoglycan link protein)	3	4	0.916097	-0.126427	0.845468	-0.242177	-0.524064	0.45861	0.0620397		0.73922	1	10.1695	null	Cell growth and/or maintenance (GO:0008151)
Q15459	SF3A1	Splicing factor 3A subunit 1 (SF3a120) (Spliceosome-associated protein 114) (SAP 114)	6	11	0.916315	-0.126084	0.84567	-0.241834	-0.523412	0.459168	0.0621105		0.739277	1	7.4401	null	Regulation of nucleobase, nucleoside, nucleotide and nucleic acid metabolism (GO:0019219)
Q8N126	CADM3	Cell adhesion molecule 3 (Brain immunoglobulin receptor) (Immunoglobulin superfamily member 4B) (IgSF4B) (Nectin-like protein 1) (NECL-1) (Synaptic cell adhesion molecule 3) (SynCAM3) (TSLC1-like protein 1) (TSLL1)	26	54	0.916736	-0.125421	0.846058	-0.241171	-0.522156	0.460247	0.0621813		0.739691	1	50.2513	null	Immune response (GO:0006955)
H0Y922	CHCHD6	MICOS complex subunit (Fragment)	3	5	0.918045	-0.123364	0.847266	-0.239114	-0.518254	0.463606	0.0626062		0.739691	1	16.8675	J3QTA6 Q9BRQ6	Biological_process unknown (GO:0000004)
P13639	EEF2	Elongation factor 2 (EF-2)	9	13	0.918049	-0.123357	0.84727	-0.239107	-0.518242	0.463617	0.0626771		0.739691	1	9.20746	null	Protein metabolism (GO:0019538); Translation (GO:0043037)
P51858	HDGF	Hepatoma-derived growth factor (HDGF) (High mobility group protein 1-like 2) (HMG-1L2)	20	45	0.918265	-0.123017	0.847469	-0.238767	-0.517597	0.464173	0.0627479		0.739743	1	62.5	null	Cell communication (GO:0007154); Signal transduction (GO:0007165)
Q8N111	CEND1	Cell cycle exit and neuronal differentiation protein 1 (BM88 antigen)	13	35	0.91848	-0.12268	0.847668	-0.23843	-0.516957	0.464726	0.0628187		0.739789	1	46.9799	null	Cell growth and/or maintenance (GO:0008151)
A0A087WT44	HMOX2	Heme oxygenase 2	2	4	0.918916	-0.121995	0.84807	-0.237745	-0.515658	0.465848	0.0628895		0.74074	1	7.02703	I3L159 I3L1F5 P30519	Metabolism (GO:0008152); Energy pathways (GO:0006091)
E7EN95	FLNB	Filamin-B	2	2	0.920728	-0.119154	0.849742	-0.234904	-0.510271	0.470521	0.0631728		0.744693	0.9997	1.99253	O75369	Cell growth and/or maintenance (GO:0008151)
P11233	RALA	Ras-related protein Ral-A	11	19	0.921158	-0.11848	0.850139	-0.23423	-0.508993	0.471633	0.0633144		0.744905	1	26.2136	null	Cell communication (GO:0007154); Signal transduction (GO:0007165)
J3KRI4	DYNC1LI2	Cytoplasmic dynein 1 light intermediate chain 2 (Fragment)	13	19	0.922093	-0.117016	0.851002	-0.232766	-0.506217	0.474053	0.0634561		0.747057	1	38.9222	O43237	Biological_process unknown (GO:0000004)
A0A0D9SFR4	PDLIM5	PDZ and LIM domain protein 5 (Fragment)	2	4	0.922807	-0.115899	0.851661	-0.231649	-0.5041	0.475905	0.0635977		0.748305	1	8.52273	Q96HC4	Cell communication (GO:0007154); Signal transduction (GO:0007165)
Q8NC51	SERBP1	Plasminogen activator inhibitor 1 RNA-binding protein (PAI1 RNA-binding protein 1) (PAI-RBP1) (SERPINE1 mRNA-binding protein 1)	6	15	0.92331	-0.115113	0.852125	-0.230863	-0.502609	0.47721	0.0636686		0.748507	1	14.7059	null	Regulation of nucleobase, nucleoside, nucleotide and nucleic acid metabolism (GO:0019219)
F5H039	GPHN	Gephyrin	1	2	0.924557	-0.113166	0.853276	-0.228915	-0.498916	0.480454	0.0640935		0.748839	0.9371	0.895141	G3V582 H0YJ30 Q9NQX3	Synapse organization and biogenesis (GO:0050808); Signal transduction (GO:0007165)
P10599	TXN	Thioredoxin (Trx) (ATL-derived factor) (ADF) (Surface-associated sulphydryl protein) (SASP)	10	19	0.924906	-0.112621	0.853598	-0.228371	-0.497883	0.481362	0.0641643		0.748839	1	45.7143	null	Metabolism (GO:0008152); Energy pathways (GO:0006091)
A0A0C4DFU2	SOD2	Superoxide dismutase (EC 1.15.1.1)	12	24	0.925251	-0.112083	0.853916	-0.227833	-0.496863	0.482261	0.0643059		0.748839	1	51.8018	P04179	Cell proliferation (GO:0008283); Anti-apoptosis (GO:0006916); Cell growth and/or maintenance (GO:0008151)
Q9C0C9	UBE2O	(E3-independent) E2 ubiquitin-conjugating enzyme (EC 2.3.2.24) (E2/E3 hybrid ubiquitin-protein ligase UBE2O) (Ubiquitin carrier protein O) (Ubiquitin-conjugating enzyme E2 O) (Ubiquitin-conjugating enzyme E2 of 230 kDa) (Ubiquitin-conjugating enzyme E2-23	2	2	0.925328	-0.111963	0.853987	-0.227713	-0.496636	0.482462	0.0643768		0.748839	0.9999	1.70279	null	Protein metabolism (GO:0019538)
A0A087WX77	NCAM1	Neural cell adhesion molecule 1	45	112	0.925658	-0.111449	0.854292	-0.227199	-0.495661	0.483322	0.0645184		0.748839	1	32.8671	P13591	Cell communication (GO:0007154); Signal transduction (GO:0007165)
P68366	TUBA4A	Tubulin alpha-4A chain (Alpha-tubulin 1) (Testis-specific alpha-tubulin) (Tubulin H2-alpha) (Tubulin alpha-1 chain)	14	41	0.925791	-0.111241	0.854415	-0.226991	-0.495267	0.483669	0.0645892		0.748839	1	25.4464	null	Cell growth and/or maintenance (GO:0008151)
P62993	GRB2	Growth factor receptor-bound protein 2 (Adapter protein GRB2) (Protein Ash) (SH2/SH3 adapter GRB2)	8	13	0.926917	-0.109488	0.855454	-0.225238	-0.491942	0.48661	0.0648017		0.749771	1	25.8065	null	Signal transduction (GO:0007165); Regulation of cell cycle (GO:0000074)
Q01658	DR1	Protein Dr1 (Down-regulator of transcription 1) (Negative cofactor 2-beta) (NC2-beta) (TATA-binding protein-associated phosphoprotein)	6	9	0.926993	-0.10937	0.855524	-0.22512	-0.491718	0.486808	0.0648725		0.749771	1	19.8864	null	Regulation of nucleobase, nucleoside, nucleotide and nucleic acid metabolism (GO:0019219)
P37840	SNCA	Alpha-synuclein (Non-A beta component of AD amyloid) (Non-A4 component of amyloid precursor) (NACP)	35	154	0.927038	-0.1093	0.855566	-0.22505	-0.491585	0.486926	0.0649433		0.749771	1	92.8571	null	Protein metabolism (GO:0019538)
Q8WUW1	BRK1	Protein BRICK1 (BRK1)	2	3	0.927317	-0.108866	0.855823	-0.224616	-0.490763	0.487655	0.0650142		0.750075	0.9959	20	null	Biological_process unknown (GO:0000004)
O60262	GNG7	Guanine nucleotide-binding protein G(I)/G(S)/G(O) subunit gamma-7	4	6	0.928329	-0.107291	0.856758	-0.223041	-0.487776	0.490308	0.0652266		0.750474	1	30.8824	null	Cell communication (GO:0007154); Signal transduction (GO:0007165)
Q05639	EEF1A2	Elongation factor 1-alpha 2 (EF-1-alpha-2) (Eukaryotic elongation factor 1 A-2) (eEF1A-2) (Statin-S1)	21	45	0.928397	-0.107186	0.85682	-0.222936	-0.487577	0.490485	0.0652975		0.750474	1	26.7819	null	Protein metabolism (GO:0019538)
E7EVA0	MAP4	Microtubule-associated protein	31	58	0.929313	-0.105764	0.857665	-0.221514	-0.48488	0.492887	0.0655099		0.751604	1	10.6226	P27816	Cell growth and/or maintenance (GO:0008151)
E9PBS1	PAICS	Multifunctional protein ADE2 (Fragment)	5	7	0.929552	-0.105393	0.857886	-0.221143	-0.484176	0.493515	0.0656516		0.751719	1	11.8644	P22234	Metabolism (GO:0008152); Energy pathways (GO:0006091)
O00479	HMGN4	High mobility group nucleosome-binding domain-containing protein 4 (Non-histone chromosomal protein HMG-17-like 3) (Non-histone chromosomal protein)	5	16	0.930489	-0.103938	0.858751	-0.219688	-0.481418	0.49598	0.0657932		0.753847	1	28.8889	null	Regulation of nucleobase, nucleoside, nucleotide and nucleic acid metabolism (GO:0019219)
P30049	ATP5D	ATP synthase subunit delta, mitochondrial (F-ATPase delta subunit)	8	21	0.932285	-0.101157	0.860408	-0.216907	-0.476145	0.500712	0.0659348		0.75896	1	20.2381	null	Ion transport (GO:0006811)
P56381	ATP5E	ATP synthase subunit epsilon, mitochondrial (ATPase subunit epsilon)	3	5	0.932403	-0.100975	0.860517	-0.216725	-0.475799	0.501023	0.0660057		0.75896	1	31.3725	Q5VTU8	Ion transport (GO:0006811)
Q5T0I0	GSN	Gelsolin (Fragment)	9	14	0.932671	-0.10056	0.860764	-0.21631	-0.475012	0.501731	0.0660765		0.75896	1	18.0769	null	Cell growth and/or maintenance (GO:0008151)
P56385	ATP5I	ATP synthase subunit e, mitochondrial (ATPase subunit e) [Cleaved into: ATP synthase subunit e, mitochondrial, N-terminally processed]	6	11	0.933023	-0.100016	0.861089	-0.215766	-0.47398	0.502661	0.0662181		0.75896	1	34.7826	null	Metabolism (GO:0008152); Energy pathways (GO:0006091)
E5RJR5	SKP1	S-phase kinase-associated protein 1	14	28	0.933395	-0.0994408	0.861432	-0.215191	-0.47289	0.503644	0.0663598		0.75896	1	33.7423	P63208	Protein metabolism (GO:0019538); Regulation of cell cycle (GO:0000074); Chromosome segregation (GO:0007059)
E9PJP2	SOGA3	Protein SOGA3	3	4	0.933741	-0.0989053	0.861752	-0.214655	-0.471874	0.504561	0.0664306		0.759247	1	3.70763	Q5TF21	Biological_process unknown (GO:0000004)
P46821	MAP1B	Microtubule-associated protein 1B (MAP-1B) [Cleaved into: MAP1B heavy chain; MAP1 light chain LC1]	88	172	0.933934	-0.0986077	0.86193	-0.214358	-0.47131	0.505071	0.0665014		0.759247	1	32.1718	null	Cell growth and/or maintenance (GO:0008151)
F8W8W7	TGOLN2	Trans-Golgi network integral membrane protein 2	4	8	0.934648	-0.0975045	0.862589	-0.213255	-0.469218	0.506963	0.0666431		0.759321	1	8.35073	J3KQ45 O43493	Transport (GO:0006810)
B7Z613	GPM6B	Neuronal membrane glycoprotein M6-b (cDNA FLJ54144, highly similar to Neuronal membrane glycoprotein M6-b)	5	10	0.935125	-0.0967693	0.863029	-0.212519	-0.467824	0.508226	0.0667847		0.759321	1	11.5894	null	Biological_process unknown (GO:0000004)
B8ZZY2	AGFG1	Arf-GAP domain and FG repeat-containing protein 1	2	3	0.935371	-0.0963899	0.863256	-0.21214	-0.467104	0.508878	0.0669263		0.759321	1	6.28466	C9J2I0 P52594	Regulation of nucleobase, nucleoside, nucleotide and nucleic acid metabolism (GO:0019219)
Q96F85	CNRIP1	CB1 cannabinoid receptor-interacting protein 1 (CRIP-1)	11	22	0.935794	-0.0957378	0.863646	-0.211488	-0.465868	0.510001	0.0669972		0.759321	1	52.439	null	Biological_process unknown (GO:0000004)
D6RAF8	HNRNPD	Heterogeneous nuclear ribonucleoprotein D0 (Fragment)	15	30	0.935963	-0.095476	0.863803	-0.211226	-0.465371	0.510452	0.067068		0.759321	1	41.629	Q14103	Regulation of nucleobase, nucleoside, nucleotide and nucleic acid metabolism (GO:0019219)
Q15424	SAFB	Scaffold attachment factor B1 (SAF-B) (SAF-B1) (HSP27 estrogen response element-TATA box-binding protein) (HSP27 ERE-TATA-binding protein)	4	8	0.936017	-0.0953937	0.863852	-0.211144	-0.465215	0.510594	0.0671388		0.759321	1	5.79235	null	Regulation of nucleobase, nucleoside, nucleotide and nucleic acid metabolism (GO:0019219)
A0A0J9YXB3		Uncharacterized protein	2	4	0.937627	-0.0929137	0.865338	-0.208664	-0.460512	0.514877	0.0673513		0.762999	1	8.48485	A6NIZ1 B7ZB78 F5GZG1 F5H823 P61224 P62834	signal transduction [GO:0007165]
H3BN72	COX4I1	Cytochrome c oxidase subunit 4 isoform 1, mitochondrial	12	26	0.937652	-0.0928748	0.865362	-0.208625	-0.460439	0.514944	0.0674221		0.762999	1	45.2381	H3BNV9 P13073	Metabolism (GO:0008152); Energy pathways (GO:0006091)
P06748	NPM1	Nucleophosmin (NPM) (Nucleolar phosphoprotein B23) (Nucleolar protein NO38) (Numatrin)	14	26	0.937978	-0.0923742	0.865662	-0.208124	-0.459489	0.515811	0.0674929		0.762999	1	48.9796	null	Protein metabolism (GO:0019538)
Q5JVS0	HABP4	Intracellular hyaluronan-binding protein 4 (IHABP-4) (IHABP4) (Ki-1/57 intracellular antigen)	1	2	0.939098	-0.0906529	0.866695	-0.206403	-0.456225	0.518798	0.067847		0.763893	0.9636	3.87409	null	Cell growth and/or maintenance (GO:0008151)
M0R1T5	CHMP2A	Charged multivesicular body protein 2a (Fragment)	2	3	0.939238	-0.0904371	0.866825	-0.206187	-0.455816	0.519173	0.0679178		0.763893	1	12.7753	O43633	Transport (GO:0006810)
P48426	PIP4K2A	Phosphatidylinositol 5-phosphate 4-kinase type-2 alpha (EC 2.7.1.149) (1-phosphatidylinositol 5-phosphate 4-kinase 2-alpha) (Diphosphoinositide kinase 2-alpha) (PIP5KIII) (Phosphatidylinositol 5-phosphate 4-kinase type II alpha) (PI(5)P 4-kinase type II a	6	11	0.939714	-0.089707	0.867264	-0.205457	-0.454432	0.520443	0.0681303		0.763893	1	10.5911	null	Cell communication (GO:0007154); Signal transduction (GO:0007165)
P30086	PEBP1	Phosphatidylethanolamine-binding protein 1 (PEBP-1) (HCNPpp) (Neuropolypeptide h3) (Prostatic-binding protein) (Raf kinase inhibitor protein) (RKIP) [Cleaved into: Hippocampal cholinergic neurostimulating peptide (HCNP)]	37	186	0.940347	-0.0887348	0.867849	-0.204485	-0.452588	0.522136	0.0682011		0.765022	1	88.7701	null	Cell communication (GO:0007154); Signal transduction (GO:0007165)
Q9BWH2	FUNDC2	FUN14 domain-containing protein 2 (Cervical cancer proto-oncogene 3 protein) (HCC-3) (Hepatitis C virus core-binding protein 6)	5	8	0.940605	-0.0883387	0.868087	-0.204089	-0.451837	0.522827	0.068272		0.765022	1	11.1111	null	Biological_process unknown (GO:0000004)
A0A087WZK9	EIF3H	Eukaryotic translation initiation factor 3 subunit H (eIF3h) (Eukaryotic translation initiation factor 3 subunit 3) (eIF-3 gamma) (eIF3 p40 subunit)	2	4	0.940859	-0.0879489	0.868321	-0.203699	-0.451098	0.523507	0.0683428		0.765022	1	5.44413	B3KS98 E5RFH0 E5RFW7 E5RGU4 E5RH59 E5RHC7 O15372	Protein metabolism (GO:0019538); Translation (GO:0043037)
Q9Y3C8	UFC1	Ubiquitin-fold modifier-conjugating enzyme 1 (Ufm1-conjugating enzyme 1)	2	2	0.940884	-0.0879108	0.868344	-0.203661	-0.451025	0.523574	0.0684136		0.765022	0.9996	5.98802	null	Protein metabolism (GO:0019538)
P29966	MARCKS	Myristoylated alanine-rich C-kinase substrate (MARCKS) (Protein kinase C substrate, 80 kDa protein, light chain) (80K-L protein) (PKCSL)	20	52	0.941014	-0.0877119	0.868464	-0.203462	-0.450648	0.523921	0.0684844		0.765022	1	32.8313	null	Cell growth and/or maintenance (GO:0008151)
O75323	NIPSNAP2	Protein NipSnap homolog 2 (NipSnap2) (Glioblastoma-amplified sequence)	6	8	0.941592	-0.0868261	0.868997	-0.202576	-0.448969	0.525469	0.0685552		0.765766	1	12.2378	null	Cell communication (GO:0007154); Signal transduction (GO:0007165)
P20336	RAB3A	Ras-related protein Rab-3A	17	43	0.941609	-0.0868001	0.869013	-0.20255	-0.448919	0.525515	0.0686261		0.765766	1	40.9091	null	Cell communication (GO:0007154); Signal transduction (GO:0007165)
O00273	DFFA	DNA fragmentation factor subunit alpha (DNA fragmentation factor 45 kDa subunit) (DFF-45) (Inhibitor of CAD) (ICAD)	1	1	0.942276	-0.0857788	0.869629	-0.201529	-0.446983	0.527303	0.0687677		0.766788	0.9424	5.13595	null	Protein metabolism (GO:0019538)
P29218	IMPA1	Inositol monophosphatase 1 (IMP 1) (IMPase 1) (EC 3.1.3.25) (D-galactose 1-phosphate phosphatase) (EC 3.1.3.94) (Inositol-1(or 4)-monophosphatase 1) (Lithium-sensitive myo-inositol monophosphatase A1)	10	16	0.943557	-0.083819	0.870811	-0.199569	-0.443266	0.530742	0.0689093		0.770204	1	26.3538	null	Metabolism (GO:0008152); Energy pathways (GO:0006091)
Q13200	PSMD2	26S proteasome non-ATPase regulatory subunit 2 (26S proteasome regulatory subunit RPN1) (26S proteasome regulatory subunit S2) (26S proteasome subunit p97) (Protein 55.11) (Tumor necrosis factor type 1 receptor-associated protein 2)	1	2	0.944989	-0.081631	0.872132	-0.197381	-0.439117	0.534596	0.0691218		0.772875	0.9713	1.65198	null	Protein metabolism (GO:0019538)
Q6PUV4	CPLX2	Complexin-2 (Complexin II) (CPX II) (Synaphin-1)	9	22	0.945054	-0.0815311	0.872193	-0.197281	-0.438928	0.534772	0.0691926		0.772875	1	47.0149	null	Vesicle docking (GO:0048278)
O95292	VAPB	Vesicle-associated membrane protein-associated protein B/C (VAMP-B/VAMP-C) (VAMP-associated protein B/C) (VAP-B/VAP-C)	11	23	0.945371	-0.0810476	0.872485	-0.196798	-0.438011	0.535626	0.0692635		0.773317	1	30.0412	null	Transport (GO:0006810)
P07900	HSP90AA1	Heat shock protein HSP 90-alpha (Heat shock 86 kDa) (HSP 86) (HSP86) (Lipopolysaccharide-associated protein 2) (LAP-2) (LPS-associated protein 2) (Renal carcinoma antigen NY-REN-38)	43	88	0.946665	-0.0790742	0.873679	-0.194824	-0.434269	0.539117	0.0694051		0.776769	1	31.4208	null	Protein metabolism (GO:0019538)
P04406	GAPDH	Glyceraldehyde-3-phosphate dehydrogenase (GAPDH) (EC 1.2.1.12) (Peptidyl-cysteine S-nitrosylase GAPDH) (EC 2.6.99.-)	61	193	0.948511	-0.076263	0.875383	-0.192013	-0.428938	0.54411	0.0694759		0.78208	1	70.4478	null	Metabolism (GO:0008152); Energy pathways (GO:0006091)
P27797	CALR	Calreticulin (CRP55) (Calregulin) (Endoplasmic reticulum resident protein 60) (ERp60) (HACBP) (grp60)	8	17	0.948642	-0.0760637	0.875504	-0.191814	-0.42856	0.544465	0.0696176		0.78208	1	17.9856	null	Protein metabolism (GO:0019538)
A0A087WYU2	METTL26	Methyltransferase-like 26	1	2	0.949383	-0.0749382	0.876188	-0.190688	-0.426426	0.546471	0.0696884		0.784163	0.954	9.23913	H3BMF3 H3BNB2 H3BNT3 H3BQ55 H3BRT2 H3BS73 Q96S19
P16949	STMN1	Stathmin (Leukemia-associated phosphoprotein p18) (Metablastin) (Oncoprotein 18) (Op18) (Phosphoprotein p19) (pp19) (Prosolin) (Protein Pr22) (pp17)	25	57	0.949752	-0.0743779	0.876528	-0.190128	-0.425363	0.547471	0.0697592		0.784413	1	64.4295	null	Cell growth and/or maintenance (GO:0008151); Signal transduction (GO:0007165)
P28070	PSMB4	Proteasome subunit beta type-4 (EC 3.4.25.1) (26 kDa prosomal protein) (HsBPROS26) (PROS-26) (Macropain beta chain) (Multicatalytic endopeptidase complex beta chain) (Proteasome beta chain) (Proteasome chain 3) (HsN3)	1	2	0.950061	-0.0739073	0.876814	-0.189657	-0.424471	0.548311	0.0699008		0.784413	0.9066	5.68182	null	Protein metabolism (GO:0019538)
Q14247	CTTN	Src substrate cortactin (Amplaxin) (Oncogene EMS1)	11	19	0.950849	-0.0727112	0.877541	-0.188461	-0.422203	0.550451	0.0700425		0.785881	1	21.8182	null	Cell growth and/or maintenance (GO:0008151)
P49189	ALDH9A1	4-trimethylaminobutyraldehyde dehydrogenase (TMABADH) (EC 1.2.1.47) (Aldehyde dehydrogenase E3 isozyme) (Aldehyde dehydrogenase family 9 member A1) (EC 1.2.1.3) (Gamma-aminobutyraldehyde dehydrogenase) (EC 1.2.1.19) (R-aminobutyraldehyde dehydrogenase) [C	20	35	0.952322	-0.0704794	0.8789	-0.186229	-0.41797	0.554454	0.0701133		0.790032	1	20.4453	null	Metabolism (GO:0008152); Energy pathways (GO:0006091)
Q15751	HERC1	Probable E3 ubiquitin-protein ligase HERC1 (EC 2.3.2.26) (HECT domain and RCC1-like domain-containing protein 1) (HECT-type E3 ubiquitin transferase HERC1) (p532) (p619)	2	3	0.9524	-0.0703606	0.878972	-0.186111	-0.417745	0.554667	0.0701841		0.790032	0.9987	0.164575	null	Transport (GO:0006810)
Q9NX40	OCIAD1	OCIA domain-containing protein 1 (Ovarian carcinoma immunoreactive antigen)	2	2	0.952545	-0.0701404	0.879106	-0.18589	-0.417328	0.555063	0.070255		0.790032	1	14.6939	null	Biological_process unknown (GO:0000004)
H0YFA4	CRIP2	Cysteine-rich protein 2 (Fragment)	4	10	0.953972	-0.0679819	0.880423	-0.183732	-0.413235	0.55895	0.0705382		0.792202	1	26.5625	P52943	Regulation of nucleobase, nucleoside, nucleotide and nucleic acid metabolism (GO:0019219)
H0Y390	MACF1	Microtubule-actin cross-linking factor 1, isoforms 1/2/3/5 (Fragment)	2	2	0.954746	-0.0668109	0.881138	-0.182561	-0.411014	0.561064	0.0707507		0.792202	0.9978	0.518719	H3BPE1 H3BQK9 Q9UPN3	Cell communication (GO:0007154); Signal transduction (GO:0007165)
P31040	SDHA	Succinate dehydrogenase [ubiquinone] flavoprotein subunit, mitochondrial (EC 1.3.5.1) (Flavoprotein subunit of complex II) (Fp)	10	17	0.954758	-0.066793	0.881148	-0.182543	-0.41098	0.561096	0.0708215		0.792202	1	10.6928	null	Metabolism (GO:0008152); Energy pathways (GO:0006091)
P62258	YWHAE	14-3-3 protein epsilon (14-3-3E)	34	97	0.95528	-0.0660048	0.88163	-0.181755	-0.409485	0.562522	0.0709632		0.792695	1	60.7843	null	Cell communication (GO:0007154); Signal transduction (GO:0007165)
Q9Y2W1	THRAP3	Thyroid hormone receptor-associated protein 3 (Thyroid hormone receptor-associated protein complex 150 kDa component) (Trap150)	3	4	0.955667	-0.0654195	0.881988	-0.181169	-0.408376	0.563581	0.071034		0.793059	1	2.82722	null	Regulation of nucleobase, nucleoside, nucleotide and nucleic acid metabolism (GO:0019219)
H3BMD8	ARPP19	cAMP-regulated phosphoprotein 19	6	10	0.955785	-0.0652417	0.882096	-0.180992	-0.408038	0.563903	0.0711048		0.793059	1	45.8015	P56211	Cell communication (GO:0007154); Signal transduction (GO:0007165)
Q16698	DECR1	2,4-dienoyl-CoA reductase, mitochondrial (EC 1.3.1.34) (2,4-dienoyl-CoA reductase [NADPH]) (4-enoyl-CoA reductase [NADPH]) (Short chain dehydrogenase/reductase family 18C member 1)	15	26	0.956224	-0.0645798	0.882501	-0.18033	-0.406783	0.565103	0.0711756		0.793769	1	26.8657	null	Metabolism (GO:0008152); Energy pathways (GO:0006091)
A0A0A0MSK5	TOR1AIP1	Torsin-1A-interacting protein 1	1	1	0.956381	-0.0643432	0.882646	-0.180093	-0.406335	0.565532	0.0712465		0.793769	0.9717	5.41125	H0YD16 J3KN66 Q5JTV8	Biological_process unknown (GO:0000004)
P60174	TPI1	Triosephosphate isomerase (TIM) (EC 5.3.1.1) (Triose-phosphate isomerase)	41	161	0.956919	-0.0635315	0.883143	-0.179281	-0.404795	0.567006	0.0713881		0.794258	1	70.6294	null	Metabolism (GO:0008152); Energy pathways (GO:0006091)
P18669	PGAM1	Phosphoglycerate mutase 1 (EC 5.4.2.11) (EC 5.4.2.4) (BPG-dependent PGAM 1) (Phosphoglycerate mutase isozyme B) (PGAM-B)	44	145	0.957881	-0.0620816	0.884031	-0.177832	-0.402046	0.569642	0.0716006		0.795583	1	59.0551	null	Metabolism (GO:0008152); Energy pathways (GO:0006091)
P05026	ATP1B1	Sodium/potassium-transporting ATPase subunit beta-1 (Sodium/potassium-dependent ATPase subunit beta-1)	21	56	0.963499	-0.0536445	0.889216	-0.169394	-0.386047	0.585098	0.0720255		0.812349	1	48.5149	null	Transport (GO:0006810)
P46777	RPL5	60S ribosomal protein L5 (Large ribosomal subunit protein uL18)	7	10	0.963744	-0.053278	0.889442	-0.169028	-0.385352	0.585774	0.0720963		0.812489	1	23.2323	null	Protein metabolism (GO:0019538)
E5RGN3	ATOX1	Copper transport protein ATOX1	2	3	0.964816	-0.051675	0.890431	-0.167425	-0.382312	0.588734	0.072238		0.814993	0.9999	23.7288	E5RIM7 O00244	Protein metabolism (GO:0019538)
F5GWT4	WNK1	Serine/threonine-protein kinase WNK1	3	3	0.965162	-0.0511572	0.89075	-0.166907	-0.38133	0.589692	0.0723088		0.815404	1	1.49953	Q9H4A3	Cell communication (GO:0007154); Signal transduction (GO:0007165)
A0A0A0MRL0	ILF2	Interleukin enhancer-binding factor 2	2	7	0.965739	-0.0502943	0.891283	-0.166044	-0.379694	0.591289	0.0724504		0.815404	1	11.3333	B4DY09 Q12905 X6R6Z1	Regulation of nucleobase, nucleoside, nucleotide and nucleic acid metabolism (GO:0019219)
Q9H2U2	PPA2	Inorganic pyrophosphatase 2, mitochondrial (EC 3.6.1.1) (Pyrophosphatase SID6-306) (Pyrophosphate phospho-hydrolase 2) (PPase 2)	4	7	0.966221	-0.0495741	0.891728	-0.165324	-0.378328	0.592624	0.0725921		0.816376	1	14.9701	null	Metabolism (GO:0008152); Energy pathways (GO:0006091)
P78371	CCT2	T-complex protein 1 subunit beta (TCP-1-beta) (CCT-beta)	16	26	0.966605	-0.0490023	0.892082	-0.164752	-0.377244	0.593685	0.0726629		0.81704	1	31.028	null	Protein metabolism (GO:0019538)
P62851	RPS25	40S ribosomal protein S25 (Small ribosomal subunit protein eS25)	3	3	0.967311	-0.047948	0.892734	-0.163698	-0.375245	0.595643	0.0727337		0.818819	1	26.4	null	Protein metabolism (GO:0019538)
C9J0K6	SRI	Sorcin	7	18	0.967968	-0.0469682	0.89334	-0.162718	-0.373387	0.597466	0.0728045		0.818819	1	30.9677	P30626	Cell communication (GO:0007154); Signal transduction (GO:0007165)
O75915	ARL6IP5	PRA1 family protein 3 (ADP-ribosylation factor-like protein 6-interacting protein 5) (ARL-6-interacting protein 5) (Aip-5) (Cytoskeleton-related vitamin A-responsive protein) (Dermal papilla-derived protein 11) (GTRAP3-18) (Glutamate transporter EAAC1-int	5	7	0.968031	-0.0468753	0.893398	-0.162625	-0.37321	0.597639	0.0728754		0.818819	1	20.2128	null	Cell communication (GO:0007154); Signal transduction (GO:0007165)
P18206	VCL	Vinculin (Metavinculin) (MV)	5	7	0.968211	-0.0466071	0.893564	-0.162357	-0.372702	0.598138	0.0729462		0.818819	1	5.64374	null	Cell growth and/or maintenance (GO:0008151)
P15927	RPA2	Replication protein A 32 kDa subunit (RP-A p32) (Replication factor A protein 2) (RF-A protein 2) (Replication protein A 34 kDa subunit) (RP-A p34)	1	2	0.968326	-0.0464357	0.89367	-0.162186	-0.372377	0.598457	0.0730878		0.818819	0.9712	10	Q5TEJ0	Regulation of nucleobase, nucleoside, nucleotide and nucleic acid metabolism (GO:0019219)
A0A1W2PR09	NECAP1	Adaptin ear-binding coat-associated protein 1	4	6	0.969048	-0.0453594	0.894337	-0.161109	-0.370336	0.600464	0.0731586		0.820769	1	18.4502	A0A1W2PRL5 A0A1W2PRM0 F5GYH1 Q8NC96	Biological_process unknown (GO:0000004)
Q9NS69	TOMM22	Mitochondrial import receptor subunit TOM22 homolog (hTom22) (1C9-2) (Translocase of outer membrane 22 kDa subunit homolog)	4	10	0.969816	-0.0442164	0.895046	-0.159966	-0.368168	0.602598	0.0733711		0.821301	1	17.6056	null	Transport (GO:0006810)
Q15121	PEA15	Astrocytic phosphoprotein PEA-15 (15 kDa phosphoprotein enriched in astrocytes) (Phosphoprotein enriched in diabetes) (PED)	16	37	0.970157	-0.0437103	0.89536	-0.15946	-0.367209	0.603543	0.0734419		0.821797	1	46.1538	null	Cell communication (GO:0007154); Signal transduction (GO:0007165)
B5MD17	CBX1	Chromobox protein homolog 1 (Fragment)	3	7	0.973016	-0.039464	0.897999	-0.155214	-0.359157	0.611507	0.073796		0.827811	1	14.881	C9JWS9 J3KS05 K7ELA4 P83916	Regulation of nucleobase, nucleoside, nucleotide and nucleic acid metabolism (GO:0019219)
G3V1C3	API5	Apoptosis inhibitor 5	7	15	0.97308	-0.0393693	0.898058	-0.155119	-0.358977	0.611685	0.0738669		0.827811	1	12.7451	Q9BZZ5	Apoptosis (GO:0006915)
A0A1W2PQF4	CNTNAP2	Contactin-associated protein-like 2	3	5	0.973216	-0.0391675	0.898184	-0.154918	-0.358594	0.612064	0.0739377		0.827811	1	8.02239	Q9UHC6	Cell communication (GO:0007154); Signal transduction (GO:0007165)
P15259	PGAM2	Phosphoglycerate mutase 2 (EC 5.4.2.11) (EC 5.4.2.4) (BPG-dependent PGAM 2) (Muscle-specific phosphoglycerate mutase) (Phosphoglycerate mutase isozyme M) (PGAM-M)	24	81	0.973863	-0.0382099	0.89878	-0.15396	-0.356778	0.613867	0.0740085		0.828021	1	40.7115	null	Metabolism (GO:0008152); Energy pathways (GO:0006091)
O60220	TIMM8A	Mitochondrial import inner membrane translocase subunit Tim8 A (Deafness dystonia protein 1) (X-linked deafness dystonia protein)	3	3	0.974113	-0.0378394	0.899011	-0.153589	-0.356076	0.614565	0.074221		0.828021	1	43.299	null	Metabolism (GO:0008152); Energy pathways (GO:0006091)
P63104	YWHAZ	14-3-3 protein zeta/delta (Protein kinase C inhibitor protein 1) (KCIP-1)	33	100	0.974542	-0.037204	0.899407	-0.152954	-0.354871	0.615764	0.0742918		0.828746	1	46.1224	null	Regulation of cell cycle (GO:0000074)
P13861	PRKAR2A	cAMP-dependent protein kinase type II-alpha regulatory subunit	7	8	0.976578	-0.0341931	0.901286	-0.149943	-0.349161	0.621455	0.0746459		0.831775	1	17.0792	null	Cell communication (GO:0007154); Signal transduction (GO:0007165)
E9PEJ4	DLAT	Acetyltransferase component of pyruvate dehydrogenase complex (EC 2.3.1.12)	15	29	0.976585	-0.0341829	0.901292	-0.149933	-0.349142	0.621475	0.0747167		0.831775	1	20.1107	P10515	Metabolism (GO:0008152); Energy pathways (GO:0006091)
G3XAN0	RPS20	40S ribosomal protein S20 (Ribosomal protein S20, isoform CRA_a)	1	2	0.976902	-0.0337138	0.901585	-0.149464	-0.348253	0.622363	0.0747875		0.831789	0.9664	18.75	P60866	Protein metabolism (GO:0019538)
Q15691	MAPRE1	Microtubule-associated protein RP/EB family member 1 (APC-binding protein EB1) (End-binding protein 1) (EB1)	5	8	0.97701	-0.0335554	0.901685	-0.149305	-0.347952	0.622664	0.0748584		0.831789	1	17.5373	null	Cell communication (GO:0007154); Signal transduction (GO:0007165)
Q9Y4Y9	LSM5	U6 snRNA-associated Sm-like protein LSm5	2	4	0.977946	-0.0321734	0.902549	-0.147923	-0.345332	0.625286	0.0749292		0.833927	1	29.6703	null	Regulation of nucleobase, nucleoside, nucleotide and nucleic acid metabolism (GO:0019219)
P63096	GNAI1	Guanine nucleotide-binding protein G(i) subunit alpha-1 (Adenylate cyclase-inhibiting G alpha protein)	7	12	0.978647	-0.0311393	0.903196	-0.146889	-0.343371	0.627251	0.0750708		0.835459	1	15.5367	null	Cell communication (GO:0007154); Signal transduction (GO:0007165)
Q9NW68	BSDC1	BSD domain-containing protein 1	1	1	0.978835	-0.0308628	0.903369	-0.146613	-0.342846	0.627777	0.0751416		0.835459	0.936	2.7907	null	Biological_process unknown (GO:0000004)
A0MZ66	SHTN1	Shootin-1 (Shootin1)	2	3	0.979246	-0.0302564	0.903749	-0.146006	-0.341696	0.628931	0.0752125		0.836206	1	2.37718	null	Biological_process unknown (GO:0000004)
Q07890	SOS2	Son of sevenless homolog 2 (SOS-2)	2	6	0.980787	-0.0279885	0.905171	-0.143738	-0.337396	0.633256	0.0753541		0.839284	0.9999	0.675676	null	Cell communication (GO:0007154); Signal transduction (GO:0007165)
P61981	YWHAG	14-3-3 protein gamma (Protein kinase C inhibitor protein 1) (KCIP-1) [Cleaved into: 14-3-3 protein gamma, N-terminally processed]	38	92	0.981223	-0.0273468	0.905573	-0.143097	-0.336179	0.634481	0.0754958		0.839284	1	42.915	null	Cell communication (GO:0007154); Signal transduction (GO:0007165)
P49773	HINT1	Histidine triad nucleotide-binding protein 1 (EC 3.-.-.-) (Adenosine 5'-monophosphoramidase) (Protein kinase C inhibitor 1) (Protein kinase C-interacting protein 1) (PKCI-1)	7	14	0.981253	-0.0273035	0.9056	-0.143054	-0.336097	0.634564	0.0755666		0.839284	1	57.1429	null	Cell communication (GO:0007154); Signal transduction (GO:0007165)
P06733	ENO1	Alpha-enolase (EC 4.2.1.11) (2-phospho-D-glycerate hydro-lyase) (C-myc promoter-binding protein) (Enolase 1) (MBP-1) (MPB-1) (Non-neural enolase) (NNE) (Phosphopyruvate hydratase) (Plasminogen-binding protein)	75	280	0.981552	-0.0268627	0.905877	-0.142613	-0.335261	0.635407	0.0757082		0.839284	1	67.7419	null	Metabolism (GO:0008152); Energy pathways (GO:0006091)
P60201	PLP1	Myelin proteolipid protein (PLP) (Lipophilin)	13	83	0.983709	-0.0236967	0.907867	-0.139447	-0.329257	0.641473	0.0759915		0.844138	1	22.7437	null	Cell growth and/or maintenance (GO:0008151)
P37837	TALDO1	Transaldolase (EC 2.2.1.2)	20	46	0.984116	-0.0230998	0.908243	-0.13885	-0.328125	0.64262	0.0760623		0.844633	1	35.0148	null	Metabolism (GO:0008152); Energy pathways (GO:0006091)
P17096	HMGA1	High mobility group protein HMG-I/HMG-Y (HMG-I(Y)) (High mobility group AT-hook protein 1) (High mobility group protein A1) (High mobility group protein R)	4	11	0.985085	-0.0216795	0.909138	-0.13743	-0.325432	0.645351	0.0762748		0.845271	1	41.1215	null	Regulation of nucleobase, nucleoside, nucleotide and nucleic acid metabolism (GO:0019219)
P43007	SLC1A4	Neutral amino acid transporter A (Alanine/serine/cysteine/threonine transporter 1) (ASCT-1) (SATT) (Solute carrier family 1 member 4)	1	2	0.985091	-0.0216709	0.909143	-0.137421	-0.325416	0.645367	0.0763456		0.845271	0.9704	4.32331	null	Transport (GO:0006810)
H0YB24	CCAR2	Cell cycle and apoptosis regulator protein 2 (Fragment)	3	5	0.98587	-0.0205305	0.909862	-0.136281	-0.323253	0.647564	0.0764164		0.845271	1	11.2195	Q8N163	Signal transduction (GO:0007165)
E5RJU9	MTDH	Protein LYRIC	6	10	0.986222	-0.0200158	0.910187	-0.135766	-0.322277	0.648556	0.0765581		0.845271	1	11.9772	Q86UE4	Biological_process unknown (GO:0000004)
P19338	NCL	Nucleolin (Protein C23)	35	69	0.98633	-0.0198576	0.910286	-0.135608	-0.321977	0.648861	0.0766289		0.845271	1	32.6761	null	Regulation of nucleobase, nucleoside, nucleotide and nucleic acid metabolism (GO:0019219)
H0YL72	IDH3A	Isocitrate dehydrogenase [NAD] subunit alpha, mitochondrial	7	10	0.986521	-0.0195778	0.910463	-0.135328	-0.321447	0.649401	0.0766997		0.845271	1	14.1994	P50213	Metabolism (GO:0008152); Energy pathways (GO:0006091)
P35754	GLRX	Glutaredoxin-1 (Thioltransferase-1) (TTase-1)	6	10	0.986658	-0.0193774	0.910589	-0.135127	-0.321067	0.649788	0.0767705		0.845271	1	31.1321	null	Metabolism (GO:0008152); Energy pathways (GO:0006091)
Q06830	PRDX1	Peroxiredoxin-1 (EC 1.11.1.15) (Natural killer cell-enhancing factor A) (NKEF-A) (Proliferation-associated gene protein) (PAG) (Thioredoxin peroxidase 2) (Thioredoxin-dependent peroxide reductase 2)	34	116	0.987126	-0.0186935	0.911021	-0.134444	-0.31977	0.651108	0.0769122		0.845271	1	64.3216	null	Metabolism (GO:0008152); Energy pathways (GO:0006091)
P68871	HBB	Hemoglobin subunit beta (Beta-globin) (Hemoglobin beta chain) [Cleaved into: LVV-hemorphin-7; Spinorphin]	30	318	0.987199	-0.0185874	0.911088	-0.134337	-0.319569	0.651313	0.0770538		0.845271	1	80.9524	null	Transport (GO:0006810)
Q16143	SNCB	Beta-synuclein	28	128	0.988078	-0.0173028	0.9119	-0.133053	-0.317133	0.653797	0.0773371		0.845386	1	55.2239	null	Cell communication (GO:0007154); Signal transduction (GO:0007165)
P98179	RBM3	RNA-binding protein 3 (RNA-binding motif protein 3) (RNPL)	4	4	0.988646	-0.0164744	0.912424	-0.132224	-0.315562	0.655401	0.0774079		0.846132	1	28.6624	null	Regulation of nucleobase, nucleoside, nucleotide and nucleic acid metabolism (GO:0019219)
B8ZZA1	PTMA	Prothymosin alpha	6	20	0.988918	-0.0160766	0.912675	-0.131827	-0.314807	0.656172	0.0775496		0.846132	1	12.9771	B8ZZQ6 B8ZZW7 H7C2N1 P06454	Cell proliferation (GO:0008283)
Q9BRX8	FAM213A	Redox-regulatory protein FAM213A (Peroxiredoxin-like 2 activated in M-CSF stimulated monocytes) (Protein PAMM)	2	3	0.989543	-0.0151652	0.913252	-0.130915	-0.313079	0.657939	0.0776204		0.847053	1	7.86026	null	Biological_process unknown (GO:0000004)
Q9H1E3	NUCKS1	Nuclear ubiquitous casein and cyclin-dependent kinase substrate 1 (P1)	19	48	0.99004	-0.0144409	0.913711	-0.130191	-0.311706	0.659345	0.077762		0.847053	1	31.6872	null	Regulation of nucleobase, nucleoside, nucleotide and nucleic acid metabolism (GO:0019219)
P61956	SUMO2	Small ubiquitin-related modifier 2 (SUMO-2) (HSMT3) (SMT3 homolog 2) (SUMO-3) (Sentrin-2) (Ubiquitin-like protein SMT3B) (Smt3B)	5	11	0.990116	-0.0143305	0.91378	-0.13008	-0.311496	0.659559	0.0778329		0.847053	1	29.4737	null	Biological_process unknown (GO:0000004)
C9JKQ2	NDUFB3	NADH dehydrogenase [ubiquinone] 1 beta subcomplex subunit 3 (Fragment)	3	4	0.99027	-0.0141055	0.913923	-0.129855	-0.31107	0.659996	0.0779037		0.847053	1	27.6923	O43676	Metabolism (GO:0008152); Energy pathways (GO:0006091)
P14415	ATP1B2	Sodium/potassium-transporting ATPase subunit beta-2 (Adhesion molecule in glia) (AMOG) (Sodium/potassium-dependent ATPase subunit beta-2)	16	59	0.990512	-0.0137536	0.914146	-0.129504	-0.310402	0.66068	0.0779745		0.847053	1	27.5862	null	Transport (GO:0006810)
P26641	EEF1G	Elongation factor 1-gamma (EF-1-gamma) (eEF-1B gamma)	2	3	0.991415	-0.0124392	0.914979	-0.128189	-0.30791	0.663236	0.078187		0.848269	1	2.28833	null	Protein metabolism (GO:0019538)
B8ZZ67	SUMO1	SMT3 suppressor of mif two 3 homolog 1 (Yeast), isoform CRA_b (Small ubiquitin-related modifier 1)	2	3	0.992232	-0.0112502	0.915734	-0.127	-0.305655	0.665551	0.0782578		0.848683	1	14.5161	B8ZZN6 P63165	Regulation of cell cycle (GO:0000074); Apoptosis (GO:0006915); Protein modification (GO:0006464)
P11216	PYGB	Glycogen phosphorylase, brain form (EC 2.4.1.1)	19	27	0.992284	-0.011175	0.915781	-0.126925	-0.305513	0.665698	0.0783286		0.848683	1	18.0308	null	Metabolism (GO:0008152); Energy pathways (GO:0006091)
A0A0A0MS51	GSN	Gelsolin	33	81	0.992419	-0.0109782	0.915906	-0.126728	-0.305139	0.666081	0.0784703		0.848683	1	32.6203	A0A0A0MT01 P06396	Cell growth and/or maintenance (GO:0008151)
B4DGU4	CTNNB1	Catenin beta-1 (cDNA FLJ57878, highly similar to Beta-catenin)	3	5	0.994486	-0.00797634	0.917814	-0.123726	-0.299447	0.671944	0.0788244		0.85206	1	3.87597	P35222	Cell communication (GO:0007154); Signal transduction (GO:0007165)
Q9Y490	TLN1	Talin-1	13	16	0.994589	-0.00782757	0.917909	-0.123578	-0.299165	0.672235	0.0788952		0.85206	1	3.85675	null	Cell growth and/or maintenance (GO:0008151)
P50502	ST13	Hsc70-interacting protein (Hip) (Aging-associated protein 2) (Progesterone receptor-associated p48 protein) (Protein FAM10A1) (Putative tumor suppressor ST13) (Renal carcinoma antigen NY-REN-33) (Suppression of tumorigenicity 13 protein)	18	44	0.995584	-0.00638448	0.918827	-0.122134	-0.296428	0.67506	0.0791076		0.852327	1	24.3902	Q3KNR6	Cell communication (GO:0007154); Signal transduction (GO:0007165)
F5GXS8	QKI	Protein quaking (Fragment)	4	6	0.99664	-0.00485586	0.919801	-0.120606	-0.29353	0.678059	0.0793909		0.853811	1	18.75	F5GYM3 Q96PU8	RNA metabolism (GO:0016070)
H0YLD8	SHF	SH2 domain-containing adapter protein F	4	8	0.998182	-0.00262459	0.921225	-0.118375	-0.289299	0.682444	0.079745		0.853811	1	12.4138	H0YLM1 H0YLW6	Signal transduction (GO:0007165)
H3BMQ1	PFDN5	Prefoldin subunit 5	1	1	0.998896	-0.00159311	0.921884	-0.117343	-0.287343	0.684475	0.0798867		0.853811	0.9567	11.9048	H3BPF6 Q99471	Protein metabolism (GO:0019538)
P00558	PGK1	Phosphoglycerate kinase 1 (EC 2.7.2.3) (Cell migration-inducing gene 10 protein) (Primer recognition protein 2) (PRP 2)	50	107	0.999263	-0.00106427	0.922222	-0.116814	-0.28634	0.685518	0.0802408		0.853811	1	62.8297	null	Metabolism (GO:0008152); Energy pathways (GO:0006091)
P11021	HSPA5	78 kDa glucose-regulated protein (GRP-78) (Endoplasmic reticulum lumenal Ca(2+)-binding protein grp78) (Heat shock 70 kDa protein 5) (Immunoglobulin heavy chain-binding protein) (BiP)	42	117	0.99933	-0.000966944	0.922284	-0.116717	-0.286155	0.685709	0.0803116		0.853811	1	41.896	null	Protein metabolism (GO:0019538)
O75937	DNAJC8	DnaJ homolog subfamily C member 8 (Splicing protein spf31)	4	6	1.00058	0.000831686	0.923435	-0.114918	-0.282744	0.689259	0.0803824		0.857474	1	18.1818	null	Protein metabolism (GO:0019538)
P00738	HP	Haptoglobin (Zonulin) [Cleaved into: Haptoglobin alpha chain; Haptoglobin beta chain]	20	33	1.00204	0.0029366	0.924783	-0.112813	-0.278753	0.693421	0.0806657		0.858426	1	35.7143	null	Immune response (GO:0006955)
Q9P0L0	VAPA	Vesicle-associated membrane protein-associated protein A (VAMP-A) (VAMP-associated protein A) (VAP-A) (33 kDa VAMP-associated protein) (VAP-33)	18	33	1.00216	0.00311235	0.924896	-0.112638	-0.27842	0.693769	0.0807365		0.858426	1	29.3173	null	Vesicle docking (GO:0048278); Transport (GO:0006810)
P40925	MDH1	Malate dehydrogenase, cytoplasmic (EC 1.1.1.37) (Cytosolic malate dehydrogenase) (Diiodophenylpyruvate reductase) (EC 1.1.1.96)	26	70	1.00323	0.004659	0.925888	-0.111091	-0.275487	0.696834	0.080949		0.85887	1	42.2156	null	Metabolism (GO:0008152); Energy pathways (GO:0006091)
I3L1Y9	FLYWCH2	FLYWCH family member 2	3	5	1.00366	0.00527251	0.926281	-0.110477	-0.274323	0.698052	0.0812323		0.85887	1	29.8611	Q96CP2	Biological_process unknown (GO:0000004)
K7ES89	DUSP3	Dual-specificity protein phosphatase 3 (Fragment)	1	1	1.00431	0.00621083	0.926884	-0.109539	-0.272544	0.699915	0.0813739		0.85887	0.9687	9.84848	P51452	Cell communication (GO:0007154); Signal transduction (GO:0007165)
O14576	DYNC1I1	Cytoplasmic dynein 1 intermediate chain 1 (Cytoplasmic dynein intermediate chain 1) (Dynein intermediate chain 1, cytosolic) (DH IC-1)	10	18	1.00482	0.00693381	0.927349	-0.108816	-0.271173	0.701352	0.0815156		0.85887	1	17.6744	null	Cell growth and/or maintenance (GO:0008151)
O43809	NUDT21	Cleavage and polyadenylation specificity factor subunit 5 (Cleavage and polyadenylation specificity factor 25 kDa subunit) (CFIm25) (CPSF 25 kDa subunit) (Nucleoside diphosphate-linked moiety X motif 21) (Nudix motif 21) (Pre-mRNA cleavage factor Im 25 kD	5	7	1.00506	0.007281	0.927572	-0.108469	-0.270515	0.702042	0.081728		0.85887	1	24.2291	null	Regulation of nucleobase, nucleoside, nucleotide and nucleic acid metabolism (GO:0019219)
B4DFG0	DEK	Protein DEK (cDNA FLJ53031, highly similar to Protein DEK)	4	7	1.00524	0.00753423	0.927735	-0.108216	-0.270035	0.702546	0.0817989		0.85887	1	7.20461	P35659	Regulation of nucleobase, nucleoside, nucleotide and nucleic acid metabolism (GO:0019219)
H7C2T1	CDKN1B	Cyclin-dependent kinase inhibitor 1B (Fragment)	5	9	1.00697	0.0100256	0.929338	-0.105724	-0.26531	0.707508	0.0819405		0.862109	1	43.2692	P46527	Cell communication (GO:0007154); Signal transduction (GO:0007165)
Q9UPA5	BSN	Protein bassoon (Zinc finger protein 231)	57	90	1.00702	0.0100889	0.929379	-0.105661	-0.26519	0.707634	0.0820113		0.862109	1	18.6449	null	Regulation of nucleobase, nucleoside, nucleotide and nucleic acid metabolism (GO:0019219)
P31946	YWHAB	14-3-3 protein beta/alpha (Protein 1054) (Protein kinase C inhibitor protein 1) (KCIP-1) [Cleaved into: 14-3-3 protein beta/alpha, N-terminally processed]	38	110	1.00702	0.0100909	0.92938	-0.105659	-0.265186	0.707638	0.0820822		0.862109	1	43.4959	null	Signal transduction (GO:0007165)
P38606	ATP6V1A	V-type proton ATPase catalytic subunit A (V-ATPase subunit A) (EC 3.6.3.14) (V-ATPase 69 kDa subunit) (Vacuolar ATPase isoform VA68) (Vacuolar proton pump subunit alpha)	27	60	1.00768	0.0110404	0.929992	-0.10471	-0.263386	0.709533	0.082153		0.863672	1	36.953	null	Metabolism (GO:0008152); Energy pathways (GO:0006091)
Q7KZF4	SND1	Staphylococcal nuclease domain-containing protein 1 (100 kDa coactivator) (EBNA2 coactivator p100) (Tudor domain-containing protein 11) (p100 co-activator)	2	2	1.00805	0.0115653	0.930331	-0.104185	-0.262391	0.710581	0.0822238		0.863935	0.9977	1.64835	null	Regulation of nucleobase, nucleoside, nucleotide and nucleic acid metabolism (GO:0019219)
Q562R1	ACTBL2	Beta-actin-like protein 2 (Kappa-actin)	22	81	1.0084	0.0120674	0.930654	-0.103683	-0.261438	0.711584	0.0823654		0.863935	1	18.3511	null	Biological_process unknown (GO:0000004)
Q7Z2K8	GPRIN1	G protein-regulated inducer of neurite outgrowth 1 (GRIN1)	13	21	1.00963	0.0138249	0.931789	-0.101925	-0.258106	0.715099	0.0824363		0.867457	1	12.5992	null	Biological_process unknown (GO:0000004)
A0A0A0MSK8	ASPH	Aspartyl/asparaginyl beta-hydroxylase	5	14	1.01035	0.0148559	0.932455	-0.100894	-0.256151	0.717164	0.0825779		0.868421	1	17.6871	E5RG56 Q12797	Protein metabolism (GO:0019538)
O60939	SCN2B	Sodium channel subunit beta-2	2	4	1.0112	0.0160629	0.933235	-0.0996871	-0.253862	0.719584	0.0828612		0.868421	1	11.6279	null	Transport (GO:0006810)
P08238	HSP90AB1	Heat shock protein HSP 90-beta (HSP 90) (Heat shock 84 kDa) (HSP 84) (HSP84)	25	45	1.01198	0.0171845	0.933961	-0.0985655	-0.251735	0.721835	0.082932		0.870394	1	23.6188	null	Cell communication (GO:0007154); Signal transduction (GO:0007165)
Q9P121	NTM	Neurotrimin (hNT) (IgLON family member 2)	7	11	1.01247	0.0178777	0.93441	-0.0978723	-0.25042	0.723228	0.0830028		0.871329	1	19.186	null	Biological_process unknown (GO:0000004)
A0A096LPK7	TXNRD2	Thioredoxin reductase 2, mitochondrial	2	2	1.01433	0.0205325	0.936131	-0.0952175	-0.245386	0.72857	0.0832861		0.874112	1	2.37581	A0A0U1RQX0 A0A182DWF2 A0A182DWF3 D3YTF8 Q9NNW7	Cell death (GO:0008219); Cell proliferation (GO:0008283)
D6RFZ2	TBC1D8B	TBC1 domain family member 8B	2	3	1.01556	0.022275	0.937262	-0.093475	-0.242082	0.732083	0.0836402		0.87478	0.9986	1.67064	J3KN75 Q0IIM8	Biological_process unknown (GO:0000004)
P29401	TKT	Transketolase (TK) (EC 2.2.1.1)	41	99	1.01902	0.0271839	0.940457	-0.088566	-0.232773	0.742011	0.0842776		0.880401	1	34.5104	null	Metabolism (GO:0008152); Energy pathways (GO:0006091)
P36957	DLST	Dihydrolipoyllysine-residue succinyltransferase component of 2-oxoglutarate dehydrogenase complex, mitochondrial (EC 2.3.1.61) (2-oxoglutarate dehydrogenase complex component E2) (OGDC-E2) (Dihydrolipoamide succinyltransferase component of 2-oxoglutarate	23	53	1.01923	0.0274764	0.940648	-0.0882736	-0.232219	0.742604	0.0843484		0.880401	1	21.4128	null	Metabolism (GO:0008152); Energy pathways (GO:0006091)
B5MCX3	02-sep	Septin-2	3	5	1.02129	0.030392	0.942551	-0.085358	-0.22669	0.748523	0.0845609		0.883538	1	12.4611	Q15019	cell cycle [GO:0007049]
A0A0C4DGI3	CS	Citrate synthase	18	41	1.02183	0.031161	0.943053	-0.084589	-0.225231	0.750086	0.0848442		0.883538	1	20.75	B4DJV2 O75390	Metabolism (GO:0008152); Energy pathways (GO:0006091)
Q5TBP9	LSM14B	Protein LSM14 homolog B (Fragment)	2	4	1.02503	0.0356729	0.946007	-0.0800771	-0.216676	0.759281	0.0850567		0.892545	1	25.4032	null	Biological_process unknown (GO:0000004)
P30041	PRDX6	Peroxiredoxin-6 (EC 1.11.1.15) (1-Cys peroxiredoxin) (1-Cys PRX) (24 kDa protein) (Acidic calcium-independent phospholipase A2) (aiPLA2) (EC 3.1.1.-) (Antioxidant protein 2) (Liver 2D page spot 40) (Non-selenium glutathione peroxidase) (NSGPx) (EC 1.11.1.	11	22	1.02522	0.0359278	0.946174	-0.0798221	-0.216192	0.759801	0.0851275		0.892545	1	44.1964	null	Metabolism (GO:0008152); Energy pathways (GO:0006091)
P0DN79	CBSL	Cystathionine beta-synthase-like protein (EC 4.2.1.22) (Beta-thionase) (Serine sulfhydrase)	9	18	1.02592	0.0369138	0.946821	-0.0788362	-0.214323	0.761815	0.0851983		0.893242	1	10.3448	P35520	Metabolism (GO:0008152); Energy pathways (GO:0006091)
A0A0D9SF30	NCAM1	Neural cell adhesion molecule 1 (Fragment)	21	43	1.0263	0.0374564	0.947177	-0.0782935	-0.213294	0.762924	0.0854108		0.893242	1	45.7265	null	Cell communication (GO:0007154); Signal transduction (GO:0007165)
A0A087WTI3	NDUFS7	NADH dehydrogenase [ubiquinone] iron-sulfur protein 7, mitochondrial	2	2	1.02913	0.0414249	0.949786	-0.0743251	-0.205768	0.771051	0.0856232		0.900516	0.9999	10.7477	A0A087WXF6 F5GXJ1 F5H5N1 O75251	Metabolism (GO:0008152); Energy pathways (GO:0006091)
A0A0G2JMZ6	KIF5C	Kinesin-like protein (Fragment)	17	26	1.02954	0.0419936	0.950161	-0.0737564	-0.20469	0.772218	0.0856941		0.901133	1	13.9535	O60282	Cell growth and/or maintenance (GO:0008151)
P09429	HMGB1	High mobility group protein B1 (High mobility group protein 1) (HMG-1)	33	98	1.0306	0.0434804	0.951141	-0.0722696	-0.20187	0.77527	0.0858357		0.903125	1	43.7209	null	Regulation of nucleobase, nucleoside, nucleotide and nucleic acid metabolism (GO:0019219)
Q9UNF0	PACSIN2	Protein kinase C and casein kinase substrate in neurons protein 2 (Syndapin-2) (Syndapin-II)	11	16	1.0308	0.0437594	0.951325	-0.0719906	-0.201341	0.775844	0.0859065		0.903125	1	15.4321	null	Cell communication (GO:0007154); Signal transduction (GO:0007165)
P23471	PTPRZ1	Receptor-type tyrosine-protein phosphatase zeta (R-PTP-zeta) (EC 3.1.3.48) (Protein-tyrosine phosphatase receptor type Z polypeptide 1) (Protein-tyrosine phosphatase receptor type Z polypeptide 2) (R-PTP-zeta-2)	17	33	1.03283	0.046596	0.953197	-0.069154	-0.195962	0.781678	0.0860482		0.90842	1	5.96112	null	Cell communication (GO:0007154); Signal transduction (GO:0007165)
A0A0A0MS47	OPALIN	Opalin	2	4	1.03305	0.0469145	0.953407	-0.0688354	-0.195358	0.782334	0.086119		0.908434	1	15.5039	A0A0A0MTN4 Q96PE5	Biological_process unknown (GO:0000004)
A0A0G2JPK6	TTYH1	Protein tweety homolog	8	15	1.03514	0.0498239	0.955332	-0.0659261	-0.189841	0.788333	0.0864731		0.911651	1	13.6223	Q9H313	Transport (GO:0006810)
E5RK69	ANXA6	Annexin	21	54	1.03618	0.0512713	0.956291	-0.0644786	-0.187097	0.791322	0.0865439		0.914359	1	36.3043	P08133	Cell communication (GO:0007154); Signal transduction (GO:0007165)
P00505	GOT2	Aspartate aminotransferase, mitochondrial (mAspAT) (EC 2.6.1.1) (EC 2.6.1.7) (Fatty acid-binding protein) (FABP-1) (Glutamate oxaloacetate transaminase 2) (Kynurenine aminotransferase 4) (Kynurenine aminotransferase IV) (Kynurenine--oxoglutarate transamin	32	54	1.03747	0.0530692	0.957483	-0.0626808	-0.183687	0.795039	0.0867564		0.914868	1	40.6977	null	Metabolism (GO:0008152); Energy pathways (GO:0006091)
H3BPE7	FUS	RNA-binding protein FUS	7	14	1.03985	0.0563697	0.959676	-0.0593803	-0.177429	0.801874	0.0874646		0.915808	1	13.852	P35637	RNA localization (GO:0006403)
Q16643	DBN1	Drebrin (Developmentally-regulated brain protein)	4	7	1.03994	0.0565005	0.959763	-0.0592495	-0.177181	0.802146	0.0875354		0.915808	1	12.1726	null	Cell growth and/or maintenance (GO:0008151)
A0A1W2PQV2	GCSH	Glycine cleavage system H protein, mitochondrial (Fragment)	4	10	1.0405	0.0572832	0.960284	-0.0584668	-0.175696	0.803769	0.0876062		0.915808	1	23	H3BUH9 P23434	Metabolism (GO:0008152); Energy pathways (GO:0006091)
B0YIW2	APOC3	Apolipoprotein C-III (Apolipoprotein C-III variant 1)	3	6	1.04056	0.0573559	0.960333	-0.0583941	-0.175559	0.80392	0.0877479		0.915808	1	16.2393	P02656	Transport (GO:0006810)
P55957	BID	BH3-interacting domain death agonist (p22 BID) (BID) [Cleaved into: BH3-interacting domain death agonist p15 (p15 BID); BH3-interacting domain death agonist p13 (p13 BID); BH3-interacting domain death agonist p11 (p11 BID)]	5	6	1.0409	0.0578277	0.960647	-0.0579222	-0.174664	0.804899	0.0878895		0.915808	1	26.6667	null	Apoptosis (GO:0006915)
M0QZ28	DTNA	Dystrobrevin alpha	4	7	1.04194	0.0592764	0.961612	-0.0564736	-0.171917	0.807907	0.0879603		0.91849	1	9.0411	Q9Y4J8	Cell communication (GO:0007154); Signal transduction (GO:0007165)
P51149	RAB7A	Ras-related protein Rab-7a	11	24	1.04259	0.0601684	0.962207	-0.0555815	-0.170225	0.809761	0.0880312		0.919305	1	35.2657	null	Cell communication (GO:0007154); Signal transduction (GO:0007165)
P61764	STXBP1	Syntaxin-binding protein 1 (MUNC18-1) (N-Sec1) (Protein unc-18 homolog 1) (Unc18-1) (Protein unc-18 homolog A) (Unc-18A) (p67)	35	88	1.04274	0.0603842	0.96235	-0.0553658	-0.169816	0.810209	0.088102		0.919305	1	30.9764	null	Neurotransmitter transport (GO:0006836)
P04075	ALDOA	Fructose-bisphosphate aldolase A (EC 4.1.2.13) (Lung cancer antigen NY-LU-1) (Muscle-type aldolase)	49	126	1.04563	0.0643732	0.965015	-0.0513768	-0.162252	0.818512	0.0889518		0.919534	1	70.8791	null	Metabolism (GO:0008152); Energy pathways (GO:0006091)
Q99436	PSMB7	Proteasome subunit beta type-7 (EC 3.4.25.1) (Macropain chain Z) (Multicatalytic endopeptidase complex chain Z) (Proteasome subunit Z)	1	2	1.04566	0.0644122	0.965041	-0.0513378	-0.162178	0.818594	0.0890227		0.919534	0.9381	3.2491	null	Protein metabolism (GO:0019538)
A0A0C4DGK4	NRXN3	Neurexin-3-beta	2	3	1.04746	0.0668984	0.966706	-0.0488516	-0.157463	0.823779	0.0890935		0.923982	1	8.29146	A0A0U1RQC5 A0A0U1RRJ0 Q9HDB5 Q9Y4C0	Cell communication (GO:0007154); Signal transduction (GO:0007165)
E7EX17	EIF4B	Eukaryotic translation initiation factor 4B	14	37	1.04751	0.0669596	0.966747	-0.0487904	-0.157347	0.823907	0.0891643		0.923982	1	18.1818	P23588	Protein metabolism (GO:0019538)
F5H5G1	LSAMP	Limbic system-associated membrane protein	7	8	1.04772	0.0672516	0.966942	-0.0484984	-0.156793	0.824517	0.0892351		0.923982	1	26.0417	H3BLU2 Q13449	Cell communication (GO:0007154); Signal transduction (GO:0007165)
A0A1B0GTG2	ALDH7A1	Alpha-aminoadipic semialdehyde dehydrogenase	17	33	1.04841	0.0682073	0.967583	-0.0475427	-0.154981	0.826512	0.0893768		0.924406	1	24.2537	A0A1B0GUA1 A0A1B0GW77 A0A1B0GW82 P49419	Metabolism (GO:0008152); Energy pathways (GO:0006091)
P30040	ERP29	Endoplasmic reticulum resident protein 29 (ERp29) (Endoplasmic reticulum resident protein 28) (ERp28) (Endoplasmic reticulum resident protein 31) (ERp31)	11	20	1.04853	0.0683729	0.967694	-0.0473771	-0.154667	0.826859	0.0894476		0.924406	1	31.8008	null	Protein folding (GO:0006457)
P30405	PPIF	Peptidyl-prolyl cis-trans isomerase F, mitochondrial (PPIase F) (EC 5.2.1.8) (Cyclophilin D) (CyP-D) (CypD) (Cyclophilin F) (Mitochondrial cyclophilin) (CyP-M) (Rotamase F)	9	15	1.05004	0.0704378	0.96908	-0.0453122	-0.150752	0.831175	0.0895892		0.927058	1	33.3333	null	Protein metabolism (GO:0019538)
Q9Y2J2	EPB41L3	Band 4.1-like protein 3 (4.1B) (Differentially expressed in adenocarcinoma of the lung protein 1) (DAL-1) [Cleaved into: Band 4.1-like protein 3, N-terminally processed]	31	70	1.05124	0.0720972	0.970195	-0.0436527	-0.147605	0.834648	0.0898725		0.928702	1	22.0791	null	Cell growth and/or maintenance (GO:0008151)
Q92859	NEO1	Neogenin (Immunoglobulin superfamily DCC subclass member 2)	4	5	1.05323	0.074816	0.972025	-0.040934	-0.142449	0.840344	0.090085		0.932835	1	3.42231	null	Cell communication (GO:0007154); Signal transduction (GO:0007165)
Q9BPW8	NIPSNAP1	Protein NipSnap homolog 1 (NipSnap1)	14	19	1.0537	0.0754594	0.972459	-0.0402905	-0.141229	0.841693	0.0902266		0.932866	1	31.338	null	Biological_process unknown (GO:0000004)
E9PEX6	DLD	Dihydrolipoyl dehydrogenase (EC 1.8.1.4)	27	46	1.05482	0.0769917	0.973492	-0.0387583	-0.138323	0.844908	0.0902975		0.934957	1	23.6626	P09622	Metabolism (GO:0008152); Energy pathways (GO:0006091)
B1AMS2	SEPT6	Septin 6, isoform CRA_b (Septin-6)	11	20	1.05553	0.0779672	0.974151	-0.0377827	-0.136474	0.846957	0.0904391		0.934957	1	16.4733	Q14141	Biological_process unknown (GO:0000004)
A0A1B0GTP9	STXBP1	Syntaxin-binding protein 1	35	88	1.05639	0.0791418	0.974944	-0.0366082	-0.134246	0.849424	0.0905807		0.934957	1	30.7301	null	Neurotransmitter transport (GO:0006836)
Q08752	PPID	Peptidyl-prolyl cis-trans isomerase D (PPIase D) (EC 5.2.1.8) (40 kDa peptidyl-prolyl cis-trans isomerase) (Cyclophilin-40) (CYP-40) (Cyclophilin-related protein) (Rotamase D)	3	5	1.05682	0.0797256	0.975339	-0.0360244	-0.133139	0.850651	0.0907224		0.934957	0.9767	5.67568	null	Metabolism (GO:0008152); Energy pathways (GO:0006091)
P10809	HSPD1	60 kDa heat shock protein, mitochondrial (EC 3.6.4.9) (60 kDa chaperonin) (Chaperonin 60) (CPN60) (Heat shock protein 60) (HSP-60) (Hsp60) (HuCHA60) (Mitochondrial matrix protein P1) (P60 lymphocyte protein)	56	145	1.05708	0.0800874	0.975584	-0.0356626	-0.132453	0.851412	0.0907932		0.934957	1	63.3508	null	Protein folding (GO:0006457); Apoptosis (GO:0006915); Regulation of immune response (GO:0050776); Signal transduction (GO:0007165)
P62805	HIST1H4A	Histone H4	14	38	1.05719	0.0802287	0.975679	-0.0355213	-0.132185	0.851709	0.090864		0.934957	1	57.2816	null	Regulation of nucleobase, nucleoside, nucleotide and nucleic acid metabolism (GO:0019219)
P17931	LGALS3	Galectin-3 (Gal-3) (35 kDa lectin) (Carbohydrate-binding protein 35) (CBP 35) (Galactose-specific lectin 3) (Galactoside-binding protein) (GALBP) (IgE-binding protein) (L-31) (Laminin-binding protein) (Lectin L-29) (Mac-2 antigen)	8	17	1.05738	0.0804929	0.975858	-0.0352571	-0.131684	0.852265	0.0910057		0.934957	1	20.4	null	Regulation of nucleobase, nucleoside, nucleotide and nucleic acid metabolism (GO:0019219)
Q6PIL6	KCNIP4	Kv channel-interacting protein 4 (KChIP4) (A-type potassium channel modulatory protein 4) (Calsenilin-like protein) (Potassium channel-interacting protein 4)	2	4	1.05746	0.0806039	0.975933	-0.035146	-0.131474	0.852498	0.0910765		0.934957	1	5.6	null	Ion transport (GO:0006811)
Q9UI12	ATP6V1H	V-type proton ATPase subunit H (V-ATPase subunit H) (Nef-binding protein 1) (NBP1) (Protein VMA13 homolog) (V-ATPase 50/57 kDa subunits) (Vacuolar proton pump subunit H) (Vacuolar proton pump subunit SFD)	5	10	1.05762	0.0808234	0.976081	-0.0349266	-0.131057	0.85296	0.0911473		0.934957	1	10.559	null	Transport (GO:0006810)
F8WBF9	NDRG3	Protein NDRG3	2	4	1.05773	0.0809774	0.976186	-0.0347726	-0.130766	0.853284	0.0912181		0.934957	1	5.35714	Q5TH30 Q9UGV2	Cell differentiation (GO:0030154)
P62760	VSNL1	Visinin-like protein 1 (VILIP) (VLP-1) (Hippocalcin-like protein 3) (HLP3)	15	29	1.05804	0.0814008	0.976472	-0.0343491	-0.129963	0.854174	0.0913598		0.934957	1	40.3141	null	Cell communication (GO:0007154); Signal transduction (GO:0007165)
Q01650	SLC7A5	Large neutral amino acids transporter small subunit 1 (4F2 light chain) (4F2 LC) (4F2LC) (CD98 light chain) (Integral membrane protein E16) (L-type amino acid transporter 1) (hLAT1) (Solute carrier family 7 member 5) (y+ system cationic amino acid transpo	2	2	1.05947	0.0833369	0.977783	-0.0324131	-0.126291	0.85825	0.0915014		0.937963	0.9997	3.15582	null	Transport (GO:0006810)
Q9NYF8	BCLAF1	Bcl-2-associated transcription factor 1 (Btf)	11	12	1.05996	0.0840111	0.978241	-0.0317389	-0.125013	0.85967	0.0915722		0.938387	1	12.1739	null	Regulation of nucleobase, nucleoside, nucleotide and nucleic acid metabolism (GO:0019219)
P20337	RAB3B	Ras-related protein Rab-3B	3	5	1.06053	0.0847827	0.978764	-0.0309672	-0.123549	0.861295	0.0917847		0.938387	0.9975	11.4155	null	Cell communication (GO:0007154); Signal transduction (GO:0007165)
P04899	GNAI2	Guanine nucleotide-binding protein G(i) subunit alpha-2 (Adenylate cyclase-inhibiting G alpha protein)	8	14	1.06125	0.0857711	0.979435	-0.0299789	-0.121675	0.863379	0.0918555		0.939931	1	19.7183	null	Cell communication (GO:0007154); Signal transduction (GO:0007165)
H3BNT7	PSMD7	26S proteasome non-ATPase regulatory subunit 7	2	3	1.06156	0.0861925	0.979721	-0.0295575	-0.120876	0.864267	0.0919263		0.940174	1	27.1186	H3BTM8 P51665	Protein metabolism (GO:0019538)
P00918	CA2	Carbonic anhydrase 2 (EC 4.2.1.1) (Carbonate dehydratase II) (Carbonic anhydrase C) (CAC) (Carbonic anhydrase II) (CA-II)	19	40	1.06399	0.0894885	0.981962	-0.0262615	-0.114626	0.871223	0.0919972		0.946751	1	47.3077	null	Metabolism (GO:0008152); Energy pathways (GO:0006091)
P32119	PRDX2	Peroxiredoxin-2 (EC 1.11.1.15) (Natural killer cell-enhancing factor B) (NKEF-B) (PRP) (Thiol-specific antioxidant protein) (TSA) (Thioredoxin peroxidase 1) (Thioredoxin-dependent peroxide reductase 1)	32	122	1.06425	0.0898411	0.982202	-0.0259089	-0.113957	0.871967	0.092068		0.946751	1	79.2929	null	Metabolism (GO:0008152); Energy pathways (GO:0006091)
A6NMQ3	ENSA	Alpha-endosulfine	4	6	1.06447	0.0901343	0.982401	-0.0256156	-0.113401	0.872587	0.0921388		0.946751	1	27.1429	O43768 Q5T5H1	Transport (GO:0006810)
H0YIQ2	YLPM1	YLP motif-containing protein 1 (Fragment)	3	6	1.06644	0.0928009	0.984219	-0.022949	-0.108345	0.878223	0.0924221		0.95023	1	3.19749	P49750	Biological_process unknown (GO:0000004)
H7C3D5	RETREG2	Reticulophagy regulator 2 (Fragment)	2	4	1.06804	0.0949608	0.985693	-0.0207892	-0.104249	0.882792	0.0924929		0.954362	1	9.85222	Q8NC44	Biological_process unknown (GO:0000004)
H3BMH2	RAB11A	Ras-related protein Rab-11A (Fragment)	12	21	1.06914	0.0964549	0.986715	-0.0192951	-0.101416	0.885956	0.0927762		0.954573	1	41.9355	H3BSC1 P62491 Q15907	Cell communication (GO:0007154); Signal transduction (GO:0007165)
A0A0G2JPD5	MAPT	Microtubule-associated protein	52	146	1.06926	0.0966142	0.986824	-0.0191358	-0.101114	0.886293	0.092847		0.954573	1	32.3219	A0A0G2JQJ7 P10636	Cell growth and/or maintenance (GO:0008151)
A0A0C4DFT3	DLG1	Disks large homolog 1	8	12	1.07042	0.0981714	0.987889	-0.0175786	-0.0981608	0.889592	0.0930595		0.955939	1	8.07175	Q12959	Cell communication (GO:0007154); Signal transduction (GO:0007165)
Q13228	SELENBP1	Selenium-binding protein 1 (56 kDa selenium-binding protein) (SBP56) (SP56)	8	12	1.07317	0.101877	0.99043	-0.0138728	-0.0911335	0.897451	0.0936261		0.958534	1	16.1017	null	Protein metabolism (GO:0019538)
O75380	NDUFS6	NADH dehydrogenase [ubiquinone] iron-sulfur protein 6, mitochondrial (Complex I-13kD-A) (CI-13kD-A) (NADH-ubiquinone oxidoreductase 13 kDa-A subunit)	5	14	1.0734	0.102191	0.990646	-0.013559	-0.0905384	0.898117	0.0936969		0.958534	1	39.5161	null	Metabolism (GO:0008152); Energy pathways (GO:0006091)
P13010	XRCC5	X-ray repair cross-complementing protein 5 (EC 3.6.4.-) (86 kDa subunit of Ku antigen) (ATP-dependent DNA helicase 2 subunit 2) (ATP-dependent DNA helicase II 80 kDa subunit) (CTC box-binding factor 85 kDa subunit) (CTC85) (CTCBF) (DNA repair protein XRCC	3	3	1.07458	0.10377	0.99173	-0.0119803	-0.0875448	0.901468	0.0937677		0.959472	1	2.45902	null	Regulation of nucleobase, nucleoside, nucleotide and nucleic acid metabolism (GO:0019219)
A0A1B0GU03		Uncharacterized protein	18	30	1.07516	0.104548	0.992266	-0.0112018	-0.0860685	0.903121	0.0939093		0.959472	1	26.9759	A0A1B0GU92 A0A1B0GV23 A0A1B0GVD5 A0A1B0GW44 A0A1B0GWE8 P07339	response to biotic stimulus [GO:0009607]
Q8IXJ6	SIRT2	NAD-dependent protein deacetylase sirtuin-2 (EC 3.5.1.-) (Regulatory protein SIR2 homolog 2) (SIR2-like protein 2)	3	4	1.07531	0.104754	0.992407	-0.010996	-0.0856784	0.903558	0.094051		0.959472	1	9.2545	null	Cell communication (GO:0007154); Signal transduction (GO:0007165)
F5GX19	LAMTOR1	Ragulator complex protein LAMTOR1	2	3	1.07555	0.105079	0.992631	-0.0106709	-0.0850618	0.904249	0.0941926		0.959472	0.9998	19.7183	F5H3Y3 Q6IAA8	Biological_process unknown (GO:0000004)
P28066	PSMA5	Proteasome subunit alpha type-5 (EC 3.4.25.1) (Macropain zeta chain) (Multicatalytic endopeptidase complex zeta chain) (Proteasome zeta chain)	3	5	1.07562	0.105165	0.99269	-0.010585	-0.084899	0.904431	0.0942635		0.959472	1	14.1079	null	Protein metabolism (GO:0019538)
Q9NZH0	GPRC5B	G-protein coupled receptor family C group 5 member B (A-69G12.1) (Retinoic acid-induced gene 2 protein) (RAIG-2)	4	8	1.07625	0.106008	0.99327	-0.00974198	-0.0833004	0.906223	0.0944051		0.95993	1	12.9032	null	Cell communication (GO:0007154); Signal transduction (GO:0007165)
A8MWD9	SNRPGP15	Putative small nuclear ribonucleoprotein G-like protein 15	2	3	1.07675	0.106687	0.993738	-0.00906306	-0.0820129	0.907665	0.0944759		0.960737	1	17.1053	F5H013 P62308 Q49AN9	Regulation of nucleobase, nucleoside, nucleotide and nucleic acid metabolism (GO:0019219)
A0A087WZQ7	NAPB	Beta-soluble NSF attachment protein (N-ethylmaleimide-sensitive factor attachment protein, beta, isoform CRA_d)	10	13	1.07799	0.10834	0.994877	-0.00740957	-0.0788774	0.911181	0.0946176		0.963014	1	38.4106	Q9H115	Transport (GO:0006810)
P09471	GNAO1	Guanine nucleotide-binding protein G(o) subunit alpha	24	52	1.07952	0.110385	0.996288	-0.00536521	-0.0750008	0.915529	0.0949717		0.964002	1	41.5254	null	Cell communication (GO:0007154); Signal transduction (GO:0007165)
H7BYR8	MBP	Myelin basic protein	36	160	1.0801	0.11116	0.996823	-0.0045904	-0.0735315	0.917178	0.0950425		0.964883	1	50.4237	null	Immune response (GO:0006955); Neurogenesis (GO:0007399)
P14854	COX6B1	Cytochrome c oxidase subunit 6B1 (Cytochrome c oxidase subunit VIb isoform 1) (COX VIb-1)	9	14	1.08029	0.11142	0.997003	-0.00433008	-0.0730379	0.917732	0.0951133		0.964883	1	61.6279	null	Metabolism (GO:0008152); Energy pathways (GO:0006091)
Q6ZVF9	GPRIN3	G protein-regulated inducer of neurite outgrowth 3 (GRIN3)	6	9	1.08115	0.112564	0.997794	-0.00318555	-0.0708675	0.920168	0.095255		0.966006	1	12.6289	null	Biological_process unknown (GO:0000004)
O43175	PHGDH	D-3-phosphoglycerate dehydrogenase (3-PGDH) (EC 1.1.1.95) (2-oxoglutarate reductase) (EC 1.1.1.399) (Malate dehydrogenase) (EC 1.1.1.37)	2	2	1.08164	0.113223	0.99825	-0.00252711	-0.0696189	0.92157	0.0953258		0.966093	1	4.87805	Q5SZU1	Metabolism (GO:0008152); Energy pathways (GO:0006091)
H0YLN5	C15orf57	Uncharacterized protein C15orf57 (Fragment)	2	2	1.08181	0.113453	0.998409	-0.00229694	-0.0691824	0.92206	0.0953966		0.966093	0.9997	26.1905	H0YN78 Q9BV29	Biological_process unknown (GO:0000004)
P18859	ATP5J	ATP synthase-coupling factor 6, mitochondrial (ATPase subunit F6)	15	35	1.08239	0.114215	0.998937	-0.00153449	-0.0677366	0.923684	0.0955382		0.966821	1	57.4074	null	Energy pathways (GO:0006091)
Q9NZZ3	CHMP5	Charged multivesicular body protein 5 (Chromatin-modifying protein 5) (SNF7 domain-containing protein 2) (Vacuolar protein sorting-associated protein 60) (Vps60) (hVps60)	4	7	1.08289	0.114885	0.9994	-0.000865332	-0.0664677	0.92511	0.0956091		0.967155	1	18.7215	null	Transport (GO:0006810)
Q99962	SH3GL2	Endophilin-A1 (EEN-B1) (Endophilin-1) (SH3 domain protein 2A) (SH3 domain-containing GRB2-like protein 2)	17	37	1.08354	0.11575	1	0	-0.0648268	0.926953	0.0957507		0.96809	1	36.9318	null	Cell communication (GO:0007154); Signal transduction (GO:0007165)
F8VZX2	PCBP2	Poly(rC)-binding protein 2	9	17	1.08436	0.116838	1.00075	0.00108814	-0.0627634	0.929272	0.0958215		0.969795	1	19.6262	H3BRU6 Q15366	Regulation of nucleobase, nucleoside, nucleotide and nucleic acid metabolism (GO:0019219)
Q13554	CAMK2B	Calcium/calmodulin-dependent protein kinase type II subunit beta (CaM kinase II subunit beta) (CaMK-II subunit beta) (EC 2.7.11.17)	6	10	1.08499	0.117685	1.00134	0.00193505	-0.0611574	0.931077	0.0958924		0.970961	1	7.65766	null	Cell communication (GO:0007154); Signal transduction (GO:0007165)
P09497	CLTB	Clathrin light chain B (Lcb)	8	12	1.08567	0.118585	1.00197	0.00283511	-0.0594506	0.932996	0.0959632		0.972244	1	26.2009	null	Cell growth and/or maintenance (GO:0008151)
H0Y579	RAD23B	UV excision repair protein RAD23 homolog B (Fragment)	4	7	1.08656	0.119763	1.00279	0.00401299	-0.057217	0.935508	0.0961048		0.972811	1	32.4561	P54727	Regulation of nucleobase, nucleoside, nucleotide and nucleic acid metabolism (GO:0019219)
P09382	LGALS1	Galectin-1 (Gal-1) (14 kDa laminin-binding protein) (HLBP14) (14 kDa lectin) (Beta-galactoside-binding lectin L-14-I) (Galaptin) (HBL) (HPL) (Lactose-binding lectin 1) (Lectin galactoside-binding soluble 1) (Putative MAPK-activating protein PM12) (S-Lac l	11	17	1.08659	0.11981	1.00282	0.00405965	-0.0571285	0.935607	0.0961756		0.972811	1	46.6667	null	Immune response (GO:0006955)
P35813	PPM1A	Protein phosphatase 1A (EC 3.1.3.16) (Protein phosphatase 2C isoform alpha) (PP2C-alpha) (Protein phosphatase IA)	6	8	1.08705	0.120418	1.00324	0.00466801	-0.0559749	0.936905	0.0962465		0.973444	1	16.2304	null	Signal transduction (GO:0007165)
P31948	STIP1	Stress-induced-phosphoprotein 1 (STI1) (Hsc70/Hsp90-organizing protein) (Hop) (Renal carcinoma antigen NY-REN-11) (Transformation-sensitive protein IEF SSP 3521)	27	53	1.08779	0.121402	1.00393	0.00565173	-0.0541095	0.939003	0.0963881		0.97403	1	30.9392	null	Cell communication (GO:0007154); Signal transduction (GO:0007165)
Q9Y4G6	TLN2	Talin-2	12	16	1.08804	0.121737	1.00416	0.00598691	-0.0534739	0.939719	0.0964589		0.97403	1	4.24862	null	Cell growth and/or maintenance (GO:0008151)
P62304	SNRPE	Small nuclear ribonucleoprotein E (snRNP-E) (Sm protein E) (Sm-E) (SmE)	2	3	1.08911	0.12315	1.00514	0.00740039	-0.0507936	0.942735	0.0966006		0.97403	1	11.9565	null	Regulation of nucleobase, nucleoside, nucleotide and nucleic acid metabolism (GO:0019219)
P62937	PPIA	Peptidyl-prolyl cis-trans isomerase A (PPIase A) (EC 5.2.1.8) (Cyclophilin A) (Cyclosporin A-binding protein) (Rotamase A) [Cleaved into: Peptidyl-prolyl cis-trans isomerase A, N-terminally processed]	36	153	1.08965	0.123868	1.00564	0.00811783	-0.0494331	0.944266	0.0966714		0.97403	1	74.5455	null	Protein folding (GO:0006457); Peptide metabolism (GO:0006518)
Q14515	SPARCL1	SPARC-like protein 1 (High endothelial venule protein) (Hevin) (MAST 9)	2	2	1.08966	0.123878	1.00565	0.0081283	-0.0494132	0.944288	0.0967422		0.97403	1	6.0241	null	Cell communication (GO:0007154); Signal transduction (GO:0007165)
P78324	SIRPA	Tyrosine-protein phosphatase non-receptor type substrate 1 (SHP substrate 1) (SHPS-1) (Brain Ig-like molecule with tyrosine-based activation motifs) (Bit) (CD172 antigen-like family member A) (Inhibitory receptor SHPS-1) (Macrophage fusion receptor) (MyD-	12	23	1.08966	0.123884	1.00565	0.00813437	-0.0494017	0.944301	0.096813		0.97403	1	16.0714	null	Cell communication (GO:0007154); Signal transduction (GO:0007165)
E7ETY2	TCOF1	Treacle protein	3	4	1.09003	0.124374	1.006	0.00862363	-0.0484739	0.945346	0.0968839		0.97403	1	2.48656	J3KQ96 Q13428	Transcription (GO:0006350); Cell migration (GO:0016477); Ribosome biogenesis and assembly (GO:0042254)
P21912	SDHB	Succinate dehydrogenase [ubiquinone] iron-sulfur subunit, mitochondrial (EC 1.3.5.1) (Iron-sulfur subunit of complex II) (Ip)	5	6	1.09008	0.124432	1.00604	0.00868161	-0.048364	0.94547	0.0969547		0.97403	1	15.7143	null	Metabolism (GO:0008152); Energy pathways (GO:0006091)
O00264	PGRMC1	Membrane-associated progesterone receptor component 1 (mPR)	4	7	1.09011	0.124476	1.00607	0.00872576	-0.0482803	0.945564	0.0970255		0.97403	1	19.4872	null	Cell communication (GO:0007154); Signal transduction (GO:0007165)
P10412	HIST1H1E	Histone H1.4 (Histone H1b) (Histone H1s-4)	11	24	1.09042	0.124885	1.00635	0.009135	-0.0475042	0.946438	0.0971671		0.97403	1	24.6575	P16402 P16403	Regulation of nucleobase, nucleoside, nucleotide and nucleic acid metabolism (GO:0019219)
Q96EQ0	SGTB	Small glutamine-rich tetratricopeptide repeat-containing protein beta (Beta-SGT) (Small glutamine-rich protein with tetratricopeptide repeats 2)	4	9	1.09108	0.125763	1.00696	0.0100126	-0.0458401	0.948311	0.0973088		0.974538	1	8.55263	null	Biological_process unknown (GO:0000004)
P09211	GSTP1	Glutathione S-transferase P (EC 2.5.1.18) (GST class-pi) (GSTP1-1)	12	28	1.09229	0.127352	1.00807	0.0116016	-0.0428269	0.951705	0.0973796		0.977314	1	51.9048	null	Metabolism (GO:0008152); Energy pathways (GO:0006091)
P02689	PMP2	Myelin P2 protein (Peripheral myelin protein 2)	8	14	1.09311	0.128445	1.00884	0.0126946	-0.0407543	0.954039	0.0975212		0.978288	1	31.0606	null	Transport (GO:0006810)
C9J8Q5	ALDH5A1	Succinate-semialdehyde dehydrogenase, mitochondrial	13	25	1.09542	0.131486	1.01097	0.0157361	-0.0349868	0.960538	0.0978045		0.982099	1	18.3432	P51649	Metabolism (GO:0008152); Energy pathways (GO:0006091)
P31150	GDI1	Rab GDP dissociation inhibitor alpha (Rab GDI alpha) (Guanosine diphosphate dissociation inhibitor 1) (GDI-1) (Oligophrenin-2) (Protein XAP-4)	35	79	1.09617	0.132476	1.01166	0.0167265	-0.0331087	0.962655	0.0979462		0.982746	1	37.5839	null	Cell communication (GO:0007154); Signal transduction (GO:0007165)
O95831	AIFM1	Apoptosis-inducing factor 1, mitochondrial (EC 1.1.1.-) (Programmed cell death protein 8)	7	12	1.0994	0.136712	1.01464	0.0209622	-0.0250766	0.97171	0.0985127		0.98638	1	10.6036	null	Cell communication (GO:0007154); Signal transduction (GO:0007165)
Q7Z3B1	NEGR1	Neuronal growth regulator 1 (IgLON family member 4)	2	2	1.10117	0.13904	1.01627	0.0232899	-0.0206625	0.976688	0.098796		0.98859	0.9997	6.77966	null	Biological_process unknown (GO:0000004)
P62879	GNB2	Guanine nucleotide-binding protein G(I)/G(S)/G(T) subunit beta-2 (G protein subunit beta-2) (Transducin beta chain 2)	2	4	1.10283	0.141208	1.0178	0.0254585	-0.0165503	0.981327	0.0989377		0.990976	0.9638	8.23529	null	Cell communication (GO:0007154); Signal transduction (GO:0007165)
P27348	YWHAQ	14-3-3 protein theta (14-3-3 protein T-cell) (14-3-3 protein tau) (Protein HS1)	18	50	1.10302	0.141454	1.01798	0.0257043	-0.0160842	0.981853	0.0990793		0.990976	1	34.2857	null	Cell communication (GO:0007154); Signal transduction (GO:0007165)
E9PDG8	SNAP91	Clathrin coat assembly protein AP180	13	34	1.10522	0.144338	1.02001	0.0285879	-0.010616	0.988022	0.0994334		0.993386	1	10.3104	O60641	Cell communication (GO:0007154); Signal transduction (GO:0007165)
P78356	PIP4K2B	Phosphatidylinositol 5-phosphate 4-kinase type-2 beta (EC 2.7.1.149) (1-phosphatidylinositol 5-phosphate 4-kinase 2-beta) (Diphosphoinositide kinase 2-beta) (Phosphatidylinositol 5-phosphate 4-kinase type II beta) (PI(5)P 4-kinase type II beta) (PIP4KII-b	4	6	1.10538	0.144543	1.02016	0.0287935	-0.0102261	0.988461	0.0995042		0.993386	1	10.3365	null	Cell communication (GO:0007154); Signal transduction (GO:0007165)
Q08209	PPP3CA	Serine/threonine-protein phosphatase 2B catalytic subunit alpha isoform (EC 3.1.3.16) (CAM-PRP catalytic subunit) (Calmodulin-dependent calcineurin A subunit alpha isoform)	15	29	1.10603	0.145384	1.02075	0.0296341	-0.00863206	0.99026	0.0995751		0.99386	1	20.3455	null	Cell communication (GO:0007154); Signal transduction (GO:0007165)
Q9UDT6	CLIP2	CAP-Gly domain-containing linker protein 2 (Cytoplasmic linker protein 115) (CLIP-115) (Cytoplasmic linker protein 2) (Williams-Beuren syndrome chromosomal region 3 protein) (Williams-Beuren syndrome chromosomal region 4 protein)	10	15	1.10802	0.147986	1.0226	0.0322365	-0.0036973	0.995828	0.0998584		0.997241	1	11.1855	null	Cell communication (GO:0007154); Signal transduction (GO:0007165)
Q9HDC9	APMAP	Adipocyte plasma membrane-associated protein (Protein BSCv)	10	20	1.1084	0.148485	1.02295	0.032735	-0.00275198	0.996895	0.0999292		0.997601	1	23.3173	null	Biological_process unknown (GO:0000004)
Q9Y2S6	TMA7	Translation machinery-associated protein 7 (Coiled-coil domain-containing protein 72)	3	4	1.11064	0.151387	1.02501	0.0356375	0.00201849	0.997722	0.1		0.997722	1	37.5	null	DNA repair (GO:0006281); DNA replication (GO:0006260); Hemopoiesis (GO:0030097); Cell proliferation (GO:0008283); Cell differentiation (GO:0030154)
O15400	STX7	Syntaxin-7	4	7	1.11357	0.155194	1.02772	0.0394439	0.00731267	0.991749	0.0997875		0.99386	1	11.4943	null	Transport (GO:0006810)
P19022	CDH2	Cadherin-2 (CDw325) (Neural cadherin) (N-cadherin) (CD antigen CD325)	7	13	1.1136	0.155226	1.02774	0.0394765	0.00735808	0.991697	0.0997167		0.99386	1	10.0442	null	Cell communication (GO:0007154); Signal transduction (GO:0007165)
A0A0A0MTS2	GPI	Glucose-6-phosphate isomerase (EC 5.3.1.9) (Fragment)	25	49	1.11385	0.155551	1.02797	0.0398013	0.00780978	0.991188	0.0996459		0.99386	1	32.4607	P06744	Metabolism (GO:0008152); Energy pathways (GO:0006091)
P00390	GSR	Glutathione reductase, mitochondrial (GR) (GRase) (EC 1.8.1.7)	6	11	1.11612	0.158496	1.03007	0.0427458	0.0119051	0.986567	0.0993626		0.992896	1	19.9234	null	Metabolism (GO:0008152); Energy pathways (GO:0006091)
H7C4C5	MAP4	Microtubule-associated protein (Fragment)	15	35	1.11712	0.159787	1.03099	0.0440368	0.0137008	0.984541	0.0992918		0.991564	1	23.3266	null	Cell growth and/or maintenance (GO:0008151)
J3KQ69	MCM3	DNA replication licensing factor MCM3	2	2	1.11744	0.160199	1.03129	0.044449	0.014274	0.983895	0.099221		0.991564	0.9978	4.03423	P25205	Regulation of nucleobase, nucleoside, nucleotide and nucleic acid metabolism (GO:0019219)
O60268	KIAA0513	Uncharacterized protein KIAA0513	8	12	1.11763	0.160441	1.03146	0.0446912	0.014611	0.983514	0.0991501		0.991564	1	15.5718	null	Biological_process unknown (GO:0000004)
Q8N573	OXR1	Oxidation resistance protein 1	31	55	1.1187	0.16182	1.03245	0.0460699	0.0165286	0.981351	0.0990085		0.990976	1	30.8924	null	Biological_process unknown (GO:0000004)
G5E9G7	NRXN2	Neurexin 2, isoform CRA_a (Neurexin-2)	4	5	1.12045	0.164072	1.03406	0.0483224	0.0196614	0.977817	0.0988669		0.989024	1	2.34604	P58401 Q9P2S2	Cell recognition (GO:0008037)
F8W9U4	MAP4	Microtubule-associated protein	30	60	1.12189	0.165927	1.03539	0.0501771	0.0222411	0.974908	0.0987252		0.987496	1	28.8647	null	Cell growth and/or maintenance (GO:0008151)
J3KT51	JPT1	Jupiter microtubule-associated homolog 1	5	12	1.12216	0.166277	1.03564	0.0505275	0.0227285	0.974358	0.0986544		0.987496	1	39.4231	Q9UK76	-
H9KV90	SHANK1	SH3 and multiple ankyrin repeat domains protein 1	4	6	1.12282	0.16712	1.03625	0.0513704	0.0239008	0.973036	0.0985836		0.987016	1	4.05717	Q9Y566	Cell growth and/or maintenance (GO:0008151)
O76070	SNCG	Gamma-synuclein (Breast cancer-specific gene 1 protein) (Persyn) (Synoretin) (SR)	32	110	1.12401	0.16866	1.03736	0.0529105	0.0260428	0.97062	0.0984419		0.985983	1	90.5512	null	Protein metabolism (GO:0019538)
A0A1W2PR05	SCN1B	Sodium channel subunit beta-1	3	8	1.12439	0.169142	1.0377	0.0533918	0.0267123	0.969866	0.0983711		0.985925	1	10.8108	A0A1W2PS68 Q07699	Transport (GO:0006810)
P47756	CAPZB	F-actin-capping protein subunit beta (CapZ beta)	15	22	1.12466	0.169492	1.03795	0.0537417	0.0271989	0.969317	0.0983003		0.985925	1	38.2671	null	Cell growth and/or maintenance (GO:0008151)
P09417	QDPR	Dihydropteridine reductase (EC 1.5.1.34) (HDHPR) (Quinoid dihydropteridine reductase) (Short chain dehydrogenase/reductase family 33C member 1)	19	35	1.12512	0.17008	1.03838	0.0543305	0.0280179	0.968393	0.0982295		0.985848	1	51.6393	null	Metabolism (GO:0008152); Energy pathways (GO:0006091)
I3L170	MAPT	Microtubule-associated protein	41	119	1.12551	0.170577	1.03873	0.0548274	0.0287091	0.967614	0.0981586		0.985766	1	46.9208	null	Cell growth and/or maintenance (GO:0008151)
P02686	MBP	Myelin basic protein (MBP) (Myelin A1 protein) (Myelin membrane encephalitogenic protein)	36	159	1.12613	0.171376	1.03931	0.0556262	0.02982	0.966362	0.0980878		0.985201	1	40.1316	null	Immune response (GO:0006955); Neurogenesis (GO:0007399)
P08579	SNRPB2	U2 small nuclear ribonucleoprotein B'' (U2 snRNP B'')	2	2	1.12768	0.173356	1.04074	0.0576057	0.0325733	0.963258	0.098017		0.982746	0.9999	9.33333	null	RNA metabolism (GO:0016070)
M0QX46	CRTC1	CREB-regulated transcription coactivator 1	2	3	1.12868	0.174634	1.04166	0.0588843	0.0343515	0.961254	0.0978754		0.98212	1	5.05902	M0QXN6 Q6UUV9	CAMP-mediated signaling (GO:0019933)
A0A0A0MQT0	RBP1	Retinol binding protein 1, cellular (Retinol-binding protein 1)	4	5	1.12951	0.175692	1.04242	0.0599424	0.0358233	0.959595	0.0977337		0.981847	1	11.1675	A0A0A0MTB9 H0YAK8 P09455	Transport (GO:0006810)
F5GYN4	OTUB1	Ubiquitin thioesterase OTUB1	3	8	1.13011	0.176466	1.04298	0.0607165	0.0369	0.958382	0.0976629		0.981316	1	14.1079	F5H6Q1 J3KR44 Q96FW1	Protein metabolism (GO:0019538)
Q86VQ1	GLCCI1	Glucocorticoid-induced transcript 1 protein	2	3	1.13188	0.178723	1.04462	0.0629734	0.040039	0.954845	0.0975921		0.978404	0.9999	3.83912	null	Biological_process unknown (GO:0000004)
C9JSZ1	FUBP1	Far upstream element-binding protein 1 (Fragment)	6	10	1.13289	0.180009	1.04555	0.0642592	0.0418274	0.95283	0.0974504		0.977759	1	31.4655	null	Regulation of nucleobase, nucleoside, nucleotide and nucleic acid metabolism (GO:0019219)
D6RAX3	PCDH1	Protocadherin-1	1	2	1.13562	0.183476	1.04806	0.0677263	0.0466497	0.9474	0.097238		0.97431	0.9716	3.40314	null	Cell adhesion (GO:0007155)
Q00577	PURA	Transcriptional activator protein Pur-alpha (Purine-rich single-stranded DNA-binding protein alpha)	15	27	1.13632	0.184375	1.04872	0.0686247	0.0478991	0.945993	0.0970963		0.97403	1	29.5031	null	Regulation of nucleobase, nucleoside, nucleotide and nucleic acid metabolism (GO:0019219)
F6U236	PACSIN1	Protein kinase C and casein kinase substrate in neurons protein 1	49	127	1.13881	0.187524	1.05101	0.0717738	0.0522791	0.941063	0.0965297		0.97403	1	63.4328	Q9BY11	Cell communication (GO:0007154); Signal transduction (GO:0007165)
E9PP76	CCS	Copper chaperone for superoxide dismutase (Fragment)	2	4	1.13986	0.188851	1.05198	0.0731012	0.0541254	0.938986	0.0963173		0.97403	1	29.4118	J3KNF4 O14618	Protein metabolism (GO:0019538)
P61604	HSPE1	10 kDa heat shock protein, mitochondrial (Hsp10) (10 kDa chaperonin) (Chaperonin 10) (CPN10) (Early-pregnancy factor) (EPF)	27	73	1.14248	0.192167	1.0544	0.0764168	0.0587369	0.933799	0.096034		0.972363	1	87.2549	null	Protein metabolism (GO:0019538)
Q9UBW8	COPS7A	COP9 signalosome complex subunit 7a (SGN7a) (Signalosome subunit 7a) (Dermal papilla-derived protein 10) (JAB1-containing signalosome subunit 7a)	3	5	1.14675	0.197557	1.05834	0.0818068	0.0662337	0.925372	0.0956799		0.967155	1	15.6364	null	Regulation of nucleobase, nucleoside, nucleotide and nucleic acid metabolism (GO:0019219)
G3XAL9	SLC12A2	Solute carrier family 12 (Sodium/potassium/chloride transporters), member 2, isoform CRA_a (Solute carrier family 12 member 2)	4	6	1.14832	0.199521	1.05978	0.083771	0.0689657	0.922304	0.0954674		0.966093	1	7.13043	P55011	Transport (GO:0006810)
Q14982	OPCML	Opioid-binding protein/cell adhesion molecule (OBCAM) (OPCML) (Opioid-binding cell adhesion molecule) (IgLON family member 1)	4	6	1.14961	0.201142	1.06098	0.0853921	0.0712203	0.919772	0.0951841		0.966006	1	7.24638	null	Cell communication (GO:0007154)
A0A087WT12	GPX4	Glutathione peroxidase	9	15	1.15189	0.204007	1.06308	0.0882569	0.0752049	0.9153	0.0949008		0.964002	1	23.176	A0A087X2I2 P36969	Metabolism (GO:0008152); Energy pathways (GO:0006091)
A0A087WYR3	TPD52L2	Tumor protein D54	3	5	1.15295	0.205331	1.06406	0.0895812	0.0770468	0.913234	0.09483		0.963022	1	22.0721	A0A087WZ51 O43399	Biological_process unknown (GO:0000004)
A0A1B0GTW1	TJP2	Tight junction protein ZO-2	3	5	1.153	0.205392	1.06411	0.0896422	0.0771316	0.913139	0.0947592		0.963022	1	2.80224	Q9UDY2	Cell communication (GO:0007154); Signal transduction (GO:0007165)
O95336	PGLS	6-phosphogluconolactonase (6PGL) (EC 3.1.1.31)	8	11	1.15349	0.206009	1.06456	0.0902587	0.077989	0.912177	0.0946884		0.963022	1	34.4961	null	Metabolism (GO:0008152); Energy pathways (GO:0006091)
E9PGC8	MAP1A	Microtubule-associated protein 1A	69	134	1.15509	0.208002	1.06603	0.0922516	0.0807609	0.909069	0.0945467		0.961502	1	23.8408	P78559	Cell growth and/or maintenance (GO:0008151)
Q04760	GLO1	Lactoylglutathione lyase (EC 4.4.1.5) (Aldoketomutase) (Glyoxalase I) (Glx I) (Ketone-aldehyde mutase) (Methylglyoxalase) (S-D-lactoylglutathione methylglyoxal lyase)	12	19	1.15686	0.210211	1.06767	0.0944611	0.0838341	0.905625	0.0943343		0.95993	1	46.1957	null	Metabolism (GO:0008152); Energy pathways (GO:0006091)
E9PDE8	HSPA4L	Heat shock 70 kDa protein 4L	11	15	1.15767	0.211223	1.06842	0.0954731	0.0852415	0.904048	0.0941218		0.959472	1	11.0701	O95757	Protein metabolism (GO:0019538)
Q15818	NPTX1	Neuronal pentraxin-1 (NP1) (Neuronal pentraxin I) (NP-I)	4	6	1.15797	0.211601	1.0687	0.0958506	0.0857667	0.903459	0.0939802		0.959472	1	7.17593	null	Cell communication (GO:0007154); Signal transduction (GO:0007165)
P25788	PSMA3	Proteasome subunit alpha type-3 (EC 3.4.25.1) (Macropain subunit C8) (Multicatalytic endopeptidase complex subunit C8) (Proteasome component C8)	5	8	1.15899	0.212874	1.06964	0.0971239	0.0875376	0.901476	0.0938385		0.959472	1	15.6863	null	Protein metabolism (GO:0019538)
Q9NZ56	FMN2	Formin-2	4	7	1.16117	0.215577	1.07165	0.0998271	0.0912974	0.897267	0.0935552		0.958534	1	2.61324	null	Cell growth and/or maintenance (GO:0008151)
P02042	HBD	Hemoglobin subunit delta (Delta-globin) (Hemoglobin delta chain)	26	182	1.16181	0.216377	1.07224	0.100627	0.0924098	0.896023	0.0934844		0.958473	1	72.7891	null	Transport (GO:0006810)
P61106	RAB14	Ras-related protein Rab-14	11	24	1.1633	0.218219	1.07361	0.102469	0.0949723	0.893157	0.0934136		0.956131	1	41.3953	null	Cell communication (GO:0007154); Signal transduction (GO:0007165)
P00367	GLUD1	Glutamate dehydrogenase 1, mitochondrial (GDH 1) (EC 1.4.1.3)	18	30	1.16335	0.218282	1.07366	0.102532	0.0950595	0.893059	0.0933428		0.956131	1	22.4014	null	Metabolism (GO:0008152); Energy pathways (GO:0006091)
A0A0U1RQI6	CLASP2	CLIP-associating protein 2	6	8	1.16341	0.218359	1.07371	0.102609	0.0951673	0.892938	0.093272		0.956131	1	4.52454	E3W994 E7ERI8 E7EW49 J3KR49 O75122	Cell growth and/or maintenance (GO:0008151)
Q16555	DPYSL2	Dihydropyrimidinase-related protein 2 (DRP-2) (Collapsin response mediator protein 2) (CRMP-2) (N2A3) (Unc-33-like phosphoprotein 2) (ULIP-2)	79	295	1.16404	0.219146	1.0743	0.103396	0.0962606	0.891716	0.0932011		0.956131	1	64.5105	null	Cell communication (GO:0007154); Signal transduction (GO:0007165)
P43121	MCAM	Cell surface glycoprotein MUC18 (Cell surface glycoprotein P1H12) (Melanoma cell adhesion molecule) (Melanoma-associated antigen A32) (Melanoma-associated antigen MUC18) (S-endo 1 endothelial-associated antigen) (CD antigen CD146)	16	28	1.16449	0.219695	1.07471	0.103945	0.0970255	0.890861	0.0931303		0.956131	1	23.839	null	Cell communication (GO:0007154); Signal transduction (GO:0007165)
P08559	PDHA1	Pyruvate dehydrogenase E1 component subunit alpha, somatic form, mitochondrial (EC 1.2.4.1) (PDHE1-A type I)	15	20	1.16579	0.221311	1.07591	0.105561	0.0992729	0.888349	0.0929887		0.955331	1	24.359	null	Metabolism (GO:0008152); Energy pathways (GO:0006091)
A0A1C7CYX9	DPYSL2	Dihydropyrimidinase-related protein 2	82	302	1.1661	0.221687	1.07619	0.105937	0.0997951	0.887766	0.0929178		0.955331	1	56.8685	null	Cell communication (GO:0007154); Signal transduction (GO:0007165)
P78357	CNTNAP1	Contactin-associated protein 1 (Caspr) (Caspr1) (Neurexin IV) (Neurexin-4) (p190)	10	18	1.16748	0.223394	1.07747	0.107644	0.10217	0.885113	0.0927054		0.954573	1	5.99711	null	Cell communication (GO:0007154); Signal transduction (GO:0007165)
B3KQV6	PPP2R1A	Serine/threonine-protein phosphatase 2A 65 kDa regulatory subunit A alpha isoform (cDNA FLJ33169 fis, clone ADRGL2000384, highly similar to Serine/threonine-protein phosphatase 2A 65 kDa regulatory subunit A alpha isoform)	4	7	1.16749	0.223415	1.07748	0.107665	0.102199	0.885081	0.0926346		0.954573	1	8.04878	E9PH38 P30153	Cell communication (GO:0007154); Signal transduction (GO:0007165)
O43396	TXNL1	Thioredoxin-like protein 1 (32 kDa thioredoxin-related protein)	7	10	1.16837	0.224502	1.0783	0.108752	0.103711	0.883393	0.0925637		0.954362	1	34.9481	null	Metabolism (GO:0008152); Energy pathways (GO:0006091)
P14625	HSP90B1	Endoplasmin (94 kDa glucose-regulated protein) (GRP-94) (Heat shock protein 90 kDa beta member 1) (Tumor rejection antigen 1) (gp96 homolog)	23	40	1.17165	0.228543	1.08132	0.112793	0.109331	0.877123	0.0923513		0.949768	1	26.0274	null	Protein metabolism (GO:0019538)
A0A0C4DG67	PDZK1	Na(+)/H(+) exchange regulatory cofactor NHE-RF3 (Fragment)	2	3	1.17283	0.22999	1.0824	0.11424	0.111343	0.87488	0.0922805		0.948066	1	10.6061	A8MUH7 Q5T2W1	Transport (GO:0006810)
A0A087X1B7	CHTOP	Chromatin target of PRMT1 protein	5	6	1.17382	0.231205	1.08332	0.115455	0.113034	0.872996	0.0922096		0.946751	1	38.1579	Q9Y3Y2 X6R700
Q9BX66	SORBS1	Sorbin and SH3 domain-containing protein 1 (Ponsin) (SH3 domain protein 5) (SH3P12) (c-Cbl-associated protein) (CAP)	6	13	1.18026	0.239102	1.08926	0.123352	0.124018	0.860775	0.0917139		0.938387	1	5.03096	null	Signal transduction (GO:0007165); Cytoskeleton organization and biogenesis (GO:0007010)
Q9BPU6	DPYSL5	Dihydropyrimidinase-related protein 5 (DRP-5) (CRMP3-associated molecule) (CRAM) (Collapsin response mediator protein 5) (CRMP-5) (UNC33-like phosphoprotein 6) (ULIP-6)	23	48	1.1806	0.239521	1.08958	0.123771	0.1246	0.860128	0.0916431		0.938387	1	33.5106	null	Biological_process unknown (GO:0000004)
P58876	HIST1H2BD	Histone H2B type 1-D (HIRA-interacting protein 2) (Histone H2B.1 B) (Histone H2B.b) (H2B/b)	16	45	1.1823	0.241602	1.09115	0.125852	0.127494	0.856914	0.0914306		0.937229	1	52.381	P62807 Q5QNW6 Q93079 Q99877 Q99879 Q99880 U3KQK0	Chromosome organization and biogenesis (sensu Eukarya) (GO:0007001)
Q8WW12	PCNP	PEST proteolytic signal-containing nuclear protein (PCNP) (PEST-containing nuclear protein)	12	19	1.18406	0.243739	1.09277	0.127989	0.130466	0.853616	0.091289		0.934957	1	43.2584	null	Protein metabolism (GO:0019538)
B4DUR8	CCT3	T-complex protein 1 subunit gamma	3	3	1.18496	0.244833	1.0936	0.129083	0.131988	0.851928	0.0909348		0.934957	1	6.8	P49368	Protein metabolism (GO:0019538)
E5RIW3	TBCA	Tubulin-specific chaperone A	17	34	1.18602	0.246131	1.09458	0.130381	0.133793	0.849927	0.0906516		0.934957	1	82.1429	E5RJD8 O75347	Protein metabolism (GO:0019538)
P11177	PDHB	Pyruvate dehydrogenase E1 component subunit beta, mitochondrial (PDHE1-B) (EC 1.2.4.1)	13	24	1.18709	0.247426	1.09557	0.131676	0.135595	0.84793	0.0905099		0.934957	1	17.2702	null	Metabolism (GO:0008152); Energy pathways (GO:0006091)
A0A087WT87	SLC1A3	Amino acid transporter	11	23	1.18854	0.249186	1.0969	0.133436	0.138042	0.84522	0.0903683		0.934957	1	14.9194	A0A087X0U3 P43003	Transport (GO:0006810)
P54762	EPHB1	Ephrin type-B receptor 1 (EC 2.7.10.1) (ELK) (EPH tyrosine kinase 2) (EPH-like kinase 6) (EK6) (hEK6) (Neuronally-expressed EPH-related tyrosine kinase) (NET) (Tyrosine-protein kinase receptor EPH-2)	1	1	1.19068	0.251791	1.09889	0.136041	0.141666	0.84121	0.0901558		0.932866	0.9626	1.62602	null	Cell communication (GO:0007154); Signal transduction (GO:0007165)
D6RER5	11-sep	Septin-11	16	25	1.19148	0.252749	1.09962	0.136999	0.142999	0.839736	0.0900142		0.932835	1	29.1667	D6RGI3 Q9NVA2	Cell cycle (GO:0007049); Vesicle-mediated transport (GO:0016192)
O00499	BIN1	Myc box-dependent-interacting protein 1 (Amphiphysin II) (Amphiphysin-like protein) (Box-dependent myc-interacting protein 1) (Bridging integrator 1)	23	45	1.1918	0.253148	1.09992	0.137398	0.143554	0.839123	0.0899433		0.932835	1	29.8482	null	Cell communication (GO:0007154); Signal transduction (GO:0007165)
P19367	HK1	Hexokinase-1 (EC 2.7.1.1) (Brain form hexokinase) (Hexokinase type I) (HK I)	16	24	1.1943	0.256164	1.10222	0.140414	0.147748	0.834489	0.0898017		0.928702	1	17.121	null	Metabolism (GO:0008152); Energy pathways (GO:0006091)
P11171	EPB41	Protein 4.1 (P4.1) (4.1R) (Band 4.1) (EPB4.1)	9	12	1.19437	0.25625	1.10229	0.1405	0.147867	0.834358	0.0897309		0.928702	1	9.9537	Q4VB86	Cell growth and/or maintenance (GO:0008151)
Q01484	ANK2	Ankyrin-2 (ANK-2) (Ankyrin-B) (Brain ankyrin) (Non-erythroid ankyrin)	69	118	1.19607	0.258307	1.10386	0.142557	0.150728	0.831201	0.0896601		0.927058	1	17.2858	null	Cell growth and/or maintenance (GO:0008151)
Q66K74	MAP1S	Microtubule-associated protein 1S (MAP-1S) (BPY2-interacting protein 1) (Microtubule-associated protein 8) (Variable charge Y chromosome 2-interacting protein 1) (VCY2-interacting protein 1) (VCY2IP-1) [Cleaved into: MAP1S heavy chain; MAP1S light chain]	2	6	1.19634	0.258625	1.1041	0.142875	0.151171	0.830712	0.0895184		0.927058	1	1.88857	null	Cell growth and/or maintenance (GO:0008151)
Q96FC7	PHYHIPL	Phytanoyl-CoA hydroxylase-interacting protein-like	6	12	1.19893	0.261743	1.10649	0.145993	0.155508	0.825933	0.0893059		0.924406	1	9.30851	null	Biological_process unknown (GO:0000004)
P50897	PPT1	Palmitoyl-protein thioesterase 1 (PPT-1) (EC 3.1.2.22) (Palmitoyl-protein hydrolase 1)	15	32	1.20347	0.267197	1.11068	0.151447	0.163094	0.817587	0.088881		0.919534	1	33.3333	null	Metabolism (GO:0008152); Energy pathways (GO:0006091)
A0A096LPI6		Uncharacterized protein (Fragment)	13	34	1.20351	0.267253	1.11073	0.151503	0.163171	0.817502	0.0888102		0.919534	1	36.9176	A0A0B4J2D5 P30042
A0A087X142	08-sep	Septin-8	15	35	1.20364	0.2674	1.11084	0.15165	0.163376	0.817277	0.0887394		0.919534	1	23.9437	A6NFQ9 A6NMH6 F8W8I8 Q92599
Q9UII2	ATPIF1	ATPase inhibitor, mitochondrial (Inhibitor of F(1)F(o)-ATPase) (IF(1)) (IF1)	7	16	1.20445	0.268376	1.11159	0.152626	0.164733	0.815786	0.0886686		0.919534	1	24.5283	null	Energy pathways (GO:0006091)
E7EPK1	07-sep	Septin-7	22	42	1.20446	0.268386	1.1116	0.152636	0.164747	0.815771	0.0885977		0.919534	1	25.4005	E7ES33 Q16181
O60244	MED14	Mediator of RNA polymerase II transcription subunit 14 (Activator-recruited cofactor 150 kDa component) (ARC150) (Cofactor required for Sp1 transcriptional activation subunit 2) (CRSP complex subunit 2) (Mediator complex subunit 14) (RGR1 homolog) (hRGR1)	2	2	1.20471	0.268685	1.11183	0.152935	0.165163	0.815315	0.0885269		0.919534	0.9941	1.44429	null	Regulation of nucleobase, nucleoside, nucleotide and nucleic acid metabolism (GO:0019219)
P32004	L1CAM	Neural cell adhesion molecule L1 (N-CAM-L1) (NCAM-L1) (CD antigen CD171)	47	101	1.20588	0.270082	1.11291	0.154332	0.167106	0.813182	0.0884561		0.919305	1	28.4805	null	Biological_process unknown (GO:0000004)
P55072	VCP	Transitional endoplasmic reticulum ATPase (TER ATPase) (EC 3.6.4.6) (15S Mg(2+)-ATPase p97 subunit) (Valosin-containing protein) (VCP)	26	43	1.20593	0.270147	1.11296	0.154397	0.167196	0.813083	0.0883853		0.919305	1	26.0546	null	Metabolism (GO:0008152); Energy pathways (GO:0006091)
Q99714	HSD17B10	3-hydroxyacyl-CoA dehydrogenase type-2 (EC 1.1.1.35) (17-beta-hydroxysteroid dehydrogenase 10) (17-beta-HSD 10) (EC 1.1.1.51) (3-hydroxy-2-methylbutyryl-CoA dehydrogenase) (EC 1.1.1.178) (3-hydroxyacyl-CoA dehydrogenase type II) (Endoplasmic reticulum-ass	5	8	1.206	0.270224	1.11302	0.154474	0.167304	0.812964	0.0883144		0.919305	1	24.1379	null	Metabolism (GO:0008152); Energy pathways (GO:0006091)
A0A0G2JLL6		Uncharacterized protein	7	35	1.20637	0.270674	1.11336	0.154924	0.16793	0.812277	0.0882436		0.919305	1	15.0418	A0A1B0GTE9 A0A1B0GTP1 Q7Z6L0	response to biotic stimulus [GO:0009607]
K7ENT6	TPM4	Tropomyosin alpha-4 chain (Fragment)	29	75	1.20665	0.27101	1.11362	0.15526	0.168397	0.811765	0.0881728		0.919305	1	59.2179	null	Cell growth and/or maintenance (GO:0008151)
P05455	SSB	Lupus La protein (La autoantigen) (La ribonucleoprotein) (Sjoegren syndrome type B antigen) (SS-B)	11	19	1.21045	0.275538	1.11712	0.159788	0.174695	0.804865	0.0878187		0.915808	1	17.8922	null	Regulation of nucleobase, nucleoside, nucleotide and nucleic acid metabolism (GO:0019219)
H0YDU8	PPP5C	Serine/threonine-protein phosphatase (EC 3.1.3.16) (Fragment)	2	3	1.21098	0.276171	1.11761	0.160421	0.175575	0.803902	0.0876771		0.915808	1	3.91753	P53041	Cell communication (GO:0007154); Signal transduction (GO:0007165)
P54652	HSPA2	Heat shock-related 70 kDa protein 2 (Heat shock 70 kDa protein 2)	32	83	1.21241	0.277874	1.11893	0.162124	0.177944	0.801311	0.0873938		0.915808	1	22.3787	null	Protein metabolism (GO:0019538)
Q14289	PTK2B	Protein-tyrosine kinase 2-beta (EC 2.7.10.2) (Calcium-dependent tyrosine kinase) (CADTK) (Calcium-regulated non-receptor proline-rich tyrosine kinase) (Cell adhesion kinase beta) (CAK-beta) (CAKB) (Focal adhesion kinase 2) (FADK 2) (Proline-rich tyrosine	2	3	1.21299	0.278573	1.11948	0.162823	0.178917	0.800248	0.0873229		0.915808	1	1.09019	null	Signal transduction (GO:0007165)
B1AHC9	XRCC6	X-ray repair cross-complementing protein 6	11	15	1.21411	0.279893	1.1205	0.164143	0.180753	0.798242	0.0872521		0.914868	1	17.1735	P12956	Regulation of nucleobase, nucleoside, nucleotide and nucleic acid metabolism (GO:0019219)
A0A087WSZ3		Uncharacterized protein	1	3	1.21413	0.279927	1.12053	0.164177	0.180799	0.798191	0.0871813		0.914868	0.9415	6.16438	P09016	Regulation of nucleobase, nucleoside, nucleotide and nucleic acid metabolism (GO:0019219)
K7ELL7	PRKCSH	Glucosidase 2 subunit beta	16	30	1.21438	0.280224	1.12076	0.164474	0.181212	0.79774	0.0871105		0.914868	1	16.2617	P14314	Energy pathways (GO:0006091); Metabolism (GO:0008152)
Q9ULR3	PPM1H	Protein phosphatase 1H (EC 3.1.3.16)	11	21	1.21448	0.280334	1.12084	0.164584	0.181365	0.797574	0.0870397		0.914868	1	18.2879	null	Biological_process unknown (GO:0000004)
P67936	TPM4	Tropomyosin alpha-4 chain (TM30p1) (Tropomyosin-4)	40	97	1.21466	0.280557	1.12102	0.164807	0.181675	0.797235	0.0869688		0.914868	1	58.871	null	Cell growth and/or maintenance (GO:0008151)
O00445	SYT5	Synaptotagmin-5 (Synaptotagmin V) (SytV)	6	11	1.21575	0.28185	1.12202	0.1661	0.183473	0.795272	0.086898		0.914868	1	10.1036	null	Transport (GO:0006810)
A0A0A6YYH1	C15orf38-AP3S2	Protein C15orf38-AP3S2	2	4	1.21577	0.281867	1.12203	0.166117	0.183498	0.795245	0.0868272		0.914868	1	6.85279	Q7Z6K5	transport [GO:0006810]
O95197	RTN3	Reticulon-3 (Homolog of ASY protein) (HAP) (Neuroendocrine-specific protein-like 2) (NSP-like protein 2) (Neuroendocrine-specific protein-like II) (NSP-like protein II) (NSPLII)	4	7	1.21651	0.282743	1.12272	0.166993	0.184716	0.793917	0.0866856		0.914868	1	6.39535	null	Biological_process unknown (GO:0000004)
O14745	SLC9A3R1	Na(+)/H(+) exchange regulatory cofactor NHE-RF1 (NHERF-1) (Ezrin-radixin-moesin-binding phosphoprotein 50) (EBP50) (Regulatory cofactor of Na(+)/H(+) exchanger) (Sodium-hydrogen exchanger regulatory factor 1) (Solute carrier family 9 isoform A3 regulatory	27	65	1.21707	0.283409	1.12323	0.167659	0.185642	0.792907	0.0866147		0.914868	1	59.7765	null	Cell communication (GO:0007154); Signal transduction (GO:0007165)
P23527	HIST1H2BO	Histone H2B type 1-O (Histone H2B.2) (Histone H2B.n) (H2B/n)	14	42	1.21962	0.286428	1.12559	0.170678	0.189842	0.788332	0.0864023		0.911651	1	50	P33778 Q16778	Regulation of nucleobase, nucleoside, nucleotide and nucleic acid metabolism (GO:0019219)
A0A0C4DGS0	NDUFA6	NADH dehydrogenase [ubiquinone] 1 alpha subcomplex subunit 6	3	6	1.22016	0.287071	1.12609	0.171321	0.190735	0.78736	0.0863314		0.911651	1	24.2188	P56556	Metabolism (GO:0008152); Energy pathways (GO:0006091)
A0A0C4DH22	EPB41L1	Band 4.1-like protein 1	9	13	1.22059	0.28758	1.12649	0.17183	0.191443	0.78659	0.0862606		0.911651	1	10	Q9H4G0	Cell growth and/or maintenance (GO:0008151)
O60861	GAS7	Growth arrest-specific protein 7 (GAS-7)	7	10	1.22249	0.289817	1.12823	0.174067	0.194555	0.783207	0.0861898		0.908701	1	15.126	null	Cell cycle (GO:0007049)
Q9UHD8	SEPT9	Septin-9 (MLL septin-like fusion protein MSF-A) (MLL septin-like fusion protein) (Ovarian/Breast septin) (Ov/Br septin) (Septin D1)	24	47	1.22438	0.292047	1.12998	0.176297	0.197656	0.779839	0.0859773		0.907029	1	30.7167	null	Cell proliferation (GO:0008283)
A0A0U1RRM6	ENAH	Protein enabled homolog	3	5	1.22809	0.296419	1.13341	0.180669	0.203737	0.773249	0.0857649		0.901591	1	3.24189	Q8N8S7	Cell growth and/or maintenance (GO:0008151)
Q99426	TBCB	Tubulin-folding cofactor B (Cytoskeleton-associated protein 1) (Cytoskeleton-associated protein CKAPI) (Tubulin-specific chaperone B)	8	16	1.22949	0.298055	1.1347	0.182305	0.206013	0.770787	0.0855524		0.900516	1	23.3607	null	Protein metabolism (GO:0019538)
Q96KP4	CNDP2	Cytosolic non-specific dipeptidase (EC 3.4.13.18) (CNDP dipeptidase 2) (Carnosine dipeptidase II) (Epididymis secretory protein Li 13) (Glutamate carboxypeptidase-like protein 1) (Peptidase A)	25	47	1.23287	0.302021	1.13782	0.186271	0.21153	0.764827	0.0854816		0.894727	1	42.3158	null	Protein metabolism (GO:0019538)
P13637	ATP1A3	Sodium/potassium-transporting ATPase subunit alpha-3 (Na(+)/K(+) ATPase alpha-3 subunit) (EC 3.6.3.9) (Na(+)/K(+) ATPase alpha(III) subunit) (Sodium pump subunit alpha-3)	58	150	1.23417	0.303539	1.13902	0.187789	0.213641	0.76255	0.0853399		0.893242	1	30.997	null	Transport (GO:0006810)
C9JYY6	NRCAM	Neuronal cell adhesion molecule	33	71	1.23423	0.303611	1.13907	0.187861	0.213741	0.762442	0.0852691		0.893242	1	26.5896	Q92823	Signal transduction (GO:0007165)
P50990	CCT8	T-complex protein 1 subunit theta (TCP-1-theta) (CCT-theta) (Renal carcinoma antigen NY-REN-15)	19	39	1.23801	0.308019	1.14256	0.192269	0.219871	0.755842	0.0849858		0.889374	1	29.3796	null	Protein metabolism (GO:0019538)
P11137	MAP2	Microtubule-associated protein 2 (MAP-2)	84	151	1.24122	0.311759	1.14552	0.196009	0.225073	0.750256	0.084915		0.883538	1	42.1456	null	Cell growth and/or maintenance (GO:0008151)
E7EPT4	NDUFV2	NADH dehydrogenase [ubiquinone] flavoprotein 2, mitochondrial	6	13	1.24146	0.312038	1.14575	0.196288	0.225461	0.74984	0.0847734		0.883538	1	17.4603	P19404	Metabolism (GO:0008152); Energy pathways (GO:0006091)
Q9H307	PNN	Pinin (140 kDa nuclear and cell adhesion-related phosphoprotein) (Desmosome-associated protein) (Domain-rich serine protein) (DRS protein) (DRSP) (Melanoma metastasis clone A protein) (Nuclear protein SDK3) (SR-like protein)	2	2	1.24169	0.312309	1.14596	0.196559	0.225838	0.749436	0.0847025		0.883538	0.999	1.53417	null	Cell communication (GO:0007154); Signal transduction (GO:0007165)
A0A087WUM0	SYNJ2BP-COX16	SYNJ2BP-COX16 readthrough (Fragment)	3	4	1.24214	0.312826	1.14637	0.197076	0.226558	0.748664	0.0846317		0.883538	1	13.4409	A0A087WYV9 A0A087X1F5 P57105
B4DDD6	DBNL	Drebrin-like protein (cDNA FLJ59450, highly similar to Drebrin-like protein)	3	4	1.24226	0.312972	1.14649	0.197222	0.226761	0.748447	0.0844901		0.883538	1	5.41872	Q9UJU6	Signal transduction (GO:0007165)
G8JLD5	DNM1L	Dynamin-1-like protein	8	13	1.24369	0.31463	1.14781	0.19888	0.229067	0.745976	0.0844193		0.883538	1	9.41011	O00429	Mitochondrion organization and biogenesis (GO:0007005)
H3BTN5	PKM	Pyruvate kinase (EC 2.7.1.40) (Fragment)	56	192	1.24631	0.317657	1.15022	0.201907	0.233277	0.741473	0.0842068		0.880401	1	49.6907	null
P02545	LMNA	Prelamin-A/C [Cleaved into: Lamin-A/C (70 kDa lamin) (Renal carcinoma antigen NY-REN-32)]	22	37	1.24676	0.318187	1.15064	0.202437	0.234014	0.740686	0.084136		0.880344	1	32.6807	null	Cell growth and/or maintenance (GO:0008151)
P05023	ATP1A1	Sodium/potassium-transporting ATPase subunit alpha-1 (Na(+)/K(+) ATPase alpha-1 subunit) (EC 3.6.3.9) (Sodium pump subunit alpha-1)	55	143	1.24714	0.318619	1.15098	0.202869	0.234614	0.740044	0.0840652		0.880322	1	30.7918	null	Transport (GO:0006810)
P15104	GLUL	Glutamine synthetase (GS) (EC 6.3.1.2) (Glutamate decarboxylase) (EC 4.1.1.15) (Glutamate--ammonia ligase)	28	67	1.24927	0.321088	1.15296	0.205338	0.238049	0.736379	0.0839943		0.876701	1	38.0697	null	Metabolism (GO:0008152); Energy pathways (GO:0006091)
P14618	PKM	Pyruvate kinase PKM (EC 2.7.1.40) (Cytosolic thyroid hormone-binding protein) (CTHBP) (Opa-interacting protein 3) (OIP-3) (Pyruvate kinase 2/3) (Pyruvate kinase muscle isozyme) (Thyroid hormone-binding protein 1) (THBP1) (Tumor M2-PK) (p58)	58	196	1.25	0.321922	1.15362	0.206172	0.239209	0.735143	0.0839235		0.875967	1	55.3672	null	Energy pathways (GO:0006091); Metabolism (GO:0008152)
Q3ZCW2	LGALSL	Galectin-related protein (Lectin galactoside-binding-like protein)	4	11	1.25054	0.322554	1.15413	0.206804	0.240087	0.734207	0.0838527		0.875591	1	19.7674	null	Biological_process unknown (GO:0000004)
Q99536	VAT1	Synaptic vesicle membrane protein VAT-1 homolog (EC 1.-.-.-)	5	10	1.25117	0.323282	1.15471	0.207532	0.2411	0.733128	0.0837819		0.875044	1	11.7048	null	Transport (GO:0006810)
B9A067	IMMT	MICOS complex subunit MIC60 (Mitofilin)	14	26	1.25167	0.32385	1.15517	0.2081	0.24189	0.732287	0.083711		0.87478	1	16.315	C9J406 Q16891	Cell growth and/or maintenance (GO:0008151)
O94760	DDAH1	N(G),N(G)-dimethylarginine dimethylaminohydrolase 1 (DDAH-1) (Dimethylarginine dimethylaminohydrolase 1) (EC 3.5.3.18) (DDAHI) (Dimethylargininase-1)	16	46	1.25259	0.324918	1.15602	0.209168	0.243375	0.730707	0.0835694		0.874372	1	45.614	null	Metabolism (GO:0008152); Energy pathways (GO:0006091)
H0Y2Y8	ZYX	Zyxin (Fragment)	8	15	1.25304	0.325431	1.15643	0.209681	0.24409	0.729948	0.0834986		0.874204	1	12.2222	Q15942	Signal transduction (GO:0007165)
Q12860	CNTN1	Contactin-1 (Glycoprotein gp135) (Neural cell surface protein F3)	60	116	1.25345	0.325902	1.15681	0.210152	0.244744	0.729252	0.0834278		0.874112	1	39.8821	null	Cell growth and/or maintenance (GO:0008151)
D6R9P3	HNRNPAB	Heterogeneous nuclear ribonucleoprotein A/B	6	11	1.25349	0.325948	1.15685	0.210198	0.244808	0.729184	0.0833569		0.874112	1	13.2143	D6RBZ0 D6RD18	Regulation of nucleobase, nucleoside, nucleotide and nucleic acid metabolism (GO:0019219)
Q96NT1	NAP1L5	Nucleosome assembly protein 1-like 5 (Down-regulated in liver malignancy)	2	2	1.25446	0.327064	1.15774	0.211314	0.24636	0.727536	0.0832153		0.874112	1	6.59341	null	Biological_process unknown (GO:0000004)
P09972	ALDOC	Fructose-bisphosphate aldolase C (EC 4.1.2.13) (Brain-type aldolase)	83	258	1.2546	0.32723	1.15788	0.21148	0.246591	0.72729	0.0831445		0.874112	1	80.4945	null	Metabolism (GO:0008152); Energy pathways (GO:0006091)
Q9NVS9	PNPO	Pyridoxine-5'-phosphate oxidase (EC 1.4.3.5) (Pyridoxamine-phosphate oxidase)	5	11	1.25576	0.328561	1.15894	0.212811	0.248442	0.725326	0.0830737		0.873112	1	24.9042	null	Metabolism (GO:0008152); Energy pathways (GO:0006091)
P05091	ALDH2	Aldehyde dehydrogenase, mitochondrial (EC 1.2.1.3) (ALDH class 2) (ALDH-E2) (ALDHI)	27	59	1.25918	0.332489	1.1621	0.216739	0.253906	0.719537	0.0827904		0.868421	1	29.0135	null	Metabolism (GO:0008152); Energy pathways (GO:0006091)
B1AKY9	ATP1A2	Sodium/potassium-transporting ATPase subunit alpha (EC 3.6.3.-)	49	132	1.25931	0.33263	1.16222	0.21688	0.254102	0.71933	0.0827195		0.868421	1	28.2458	P50993	Transport (GO:0006810)
Q92752	TNR	Tenascin-R (TN-R) (Janusin) (Restrictin)	38	80	1.25937	0.332705	1.16228	0.216955	0.254206	0.71922	0.0826487		0.868421	1	20.3976	null	Cell growth and/or maintenance (GO:0008151)
P00352	ALDH1A1	Retinal dehydrogenase 1 (RALDH 1) (RalDH1) (EC 1.2.1.-) (EC 1.2.1.36) (ALDH-E1) (ALHDII) (Aldehyde dehydrogenase family 1 member A1) (Aldehyde dehydrogenase, cytosolic)	48	121	1.26143	0.335055	1.16417	0.219305	0.257474	0.715766	0.0825071		0.867521	1	48.9022	null	Aldehyde metabolism (GO:0006081)
Q9Y2R0	COA3	Cytochrome c oxidase assembly factor 3 homolog, mitochondrial (Coiled-coil domain-containing protein 56) (Mitochondrial translation regulation assembly intermediate of cytochrome c oxidase protein of 12 kDa)	6	10	1.2642	0.338221	1.16673	0.222471	0.261879	0.71112	0.0822946		0.863935	1	35.8491	null	Biological_process unknown (GO:0000004)
C9JDV8	NIPSNAP1	Protein NipSnap homolog 1 (Fragment)	5	8	1.26661	0.340967	1.16895	0.225217	0.265698	0.7071	0.0818697		0.862109	0.9997	42.6667	null	Biological_process unknown (GO:0000004)
Q12765	SCRN1	Secernin-1	15	42	1.2698	0.344606	1.17191	0.228856	0.270759	0.701786	0.0816572		0.85887	1	19.3237	null	Immune response (GO:0006955)
Q15233	NONO	Non-POU domain-containing octamer-binding protein (NonO protein) (54 kDa nuclear RNA- and DNA-binding protein) (55 kDa nuclear protein) (DNA-binding p52/p100 complex, 52 kDa subunit) (NMT55) (p54(nrb)) (p54nrb)	8	10	1.27001	0.34484	1.1721	0.22909	0.271085	0.701444	0.0815864		0.85887	1	16.3482	null	Regulation of nucleobase, nucleoside, nucleotide and nucleic acid metabolism (GO:0019219)
P06753	TPM3	Tropomyosin alpha-3 chain (Gamma-tropomyosin) (Tropomyosin-3) (Tropomyosin-5) (hTM5)	30	78	1.27047	0.345363	1.17252	0.229613	0.271812	0.700682	0.0814448		0.85887	1	45.9649	null	Cell growth and/or maintenance (GO:0008151)
P30085	CMPK1	UMP-CMP kinase (EC 2.7.4.14) (Deoxycytidylate kinase) (CK) (dCMP kinase) (Nucleoside-diphosphate kinase) (EC 2.7.4.6) (Uridine monophosphate/cytidine monophosphate kinase) (UMP/CMP kinase) (UMP/CMPK)	7	12	1.2718	0.34687	1.17375	0.23112	0.273907	0.698487	0.0813031		0.85887	1	16.3265	Q5T0D2	Regulation of nucleobase, nucleoside, nucleotide and nucleic acid metabolism (GO:0019219)
Q13011	ECH1	Delta(3,5)-Delta(2,4)-dienoyl-CoA isomerase, mitochondrial (EC 5.3.3.-)	2	2	1.27263	0.347808	1.17451	0.232058	0.275212	0.697122	0.0811615		0.85887	0.9999	3.65854	null	Metabolism (GO:0008152); Energy pathways (GO:0006091)
A0A087WX59	ADRM1	Proteasomal ubiquitin receptor ADRM1	4	6	1.27266	0.347849	1.17454	0.2321	0.27527	0.697061	0.0810907		0.85887	1	7.33696	Q16186	Signal transduction (GO:0007165)
P25705	ATP5A1	ATP synthase subunit alpha, mitochondrial	52	144	1.27268	0.347866	1.17456	0.232116	0.275294	0.697036	0.0810198		0.85887	1	50.2712	null	Metabolism (GO:0008152); Energy pathways (GO:0006091)
O14910	LIN7A	Protein lin-7 homolog A (Lin-7A) (hLin-7) (Mammalian lin-seven protein 1) (MALS-1) (Tax interaction protein 33) (TIP-33) (Vertebrate lin-7 homolog 1) (Veli-1)	12	15	1.27435	0.349763	1.1761	0.234013	0.277932	0.694279	0.0808782		0.858426	1	41.6309	null	Cell communication (GO:0007154); Signal transduction (GO:0007165)
Q8IUE6	HIST2H2AB	Histone H2A type 2-B	3	13	1.27451	0.349943	1.17625	0.234193	0.278182	0.694018	0.0808074		0.858426	0.9934	12.3077	null	Regulation of nucleobase, nucleoside, nucleotide and nucleic acid metabolism (GO:0019219)
P14550	AKR1A1	Alcohol dehydrogenase [NADP(+)] (EC 1.1.1.2) (Aldehyde reductase) (Aldo-keto reductase family 1 member A1)	4	7	1.27495	0.35044	1.17665	0.23469	0.278874	0.693295	0.0805949		0.858426	1	12.3077	null	Metabolism (GO:0008152)
A0A0D9SEP4	NRXN1	Neurexin-1-beta	7	10	1.27554	0.35111	1.1772	0.23536	0.279804	0.692324	0.0805241		0.858426	1	5.54813	A0A0R4J2G7 A0A1D5RMU6 E7ERL8	Cell recognition (GO:0008037)
O75947	ATP5H	ATP synthase subunit d, mitochondrial (ATPase subunit d)	15	35	1.27645	0.352139	1.17804	0.236389	0.281236	0.690831	0.0804533		0.858426	1	42.236	null	Energy pathways (GO:0006091); Ion transport (GO:0006811)
P60709	ACTB	Actin, cytoplasmic 1 (Beta-actin) [Cleaved into: Actin, cytoplasmic 1, N-terminally processed]	69	248	1.27978	0.355898	1.18111	0.240148	0.286465	0.685387	0.08017		0.853811	1	55.7333	P63261	Cell growth and/or maintenance (GO:0008151)
Q00688	FKBP3	Peptidyl-prolyl cis-trans isomerase FKBP3 (PPIase FKBP3) (EC 5.2.1.8) (25 kDa FK506-binding protein) (25 kDa FKBP) (FKBP-25) (FK506-binding protein 3) (FKBP-3) (Immunophilin FKBP25) (Rapamycin-selective 25 kDa immunophilin) (Rotamase)	11	17	1.28	0.356141	1.18131	0.240392	0.286803	0.685036	0.0800992		0.853811	1	31.6964	null	Metabolism (GO:0008152); Energy pathways (GO:0006091)
A0A1X7SBR3	GFAP	Glial fibrillary acidic protein	106	314	1.28016	0.356322	1.18146	0.240572	0.287055	0.684775	0.0800283		0.853811	1	77.9661	K7EMP8 P14136	Cell growth and/or maintenance (GO:0008151)
P37108	SRP14	Signal recognition particle 14 kDa protein (SRP14) (18 kDa Alu RNA-binding protein)	10	22	1.2803	0.356479	1.18159	0.240729	0.287273	0.684548	0.0799575		0.853811	1	44.1176	null	Protein metabolism (GO:0019538)
Q96SZ5	ADO	2-aminoethanethiol dioxygenase (EC 1.13.11.19) (Cysteamine dioxygenase)	3	5	1.28088	0.357133	1.18213	0.241383	0.288182	0.683603	0.0798159		0.853811	1	5.92593	null	Biological_process unknown (GO:0000004)
P21283	ATP6V1C1	V-type proton ATPase subunit C 1 (V-ATPase subunit C 1) (Vacuolar proton pump subunit C 1)	6	8	1.28184	0.358212	1.18301	0.242462	0.289683	0.682046	0.0796742		0.853811	1	11.2565	null	Transport (GO:0006810)
A0A0G2JIW1	HSPA1B	Heat shock 70 kDa protein 1B	63	142	1.28226	0.358688	1.1834	0.242938	0.290346	0.681358	0.0796034		0.853811	1	55.296	P0DMV8 P0DMV9	Protein metabolism (GO:0019538)
Q14974	KPNB1	Importin subunit beta-1 (Importin-90) (Karyopherin subunit beta-1) (Nuclear factor p97) (Pore targeting complex 97 kDa subunit) (PTAC97)	4	5	1.28363	0.360232	1.18467	0.244482	0.292493	0.679132	0.0795326		0.853811	1	3.99543	null	Transport (GO:0006810)
P30048	PRDX3	Thioredoxin-dependent peroxide reductase, mitochondrial (EC 1.11.1.15) (Antioxidant protein 1) (AOP-1) (HBC189) (Peroxiredoxin III) (Prx-III) (Peroxiredoxin-3) (Protein MER5 homolog)	15	36	1.28372	0.360334	1.18475	0.244584	0.292635	0.678985	0.0794618		0.853811	1	37.1094	null	Metabolism (GO:0008152); Energy pathways (GO:0006091)
Q13442	PDAP1	28 kDa heat- and acid-stable phosphoprotein (PDGF-associated protein) (PAP) (PDGFA-associated protein 1) (PAP1)	6	7	1.28453	0.361241	1.1855	0.245491	0.293896	0.677679	0.0793201		0.853811	1	31.4917	null	Cell communication (GO:0007154); Signal transduction (GO:0007165)
E9PQY2	PFDN4	Prefoldin subunit 4	2	4	1.2859	0.362782	1.18676	0.247032	0.296039	0.675463	0.0792493		0.852327	1	11.0294	Q9NQP4	Protein metabolism (GO:0019538)
Q13363	CTBP1	C-terminal-binding protein 1 (CtBP1) (EC 1.1.1.-)	3	4	1.28601	0.362907	1.18687	0.247157	0.296214	0.675282	0.0791785		0.852327	1	4.31818	null	Regulation of nucleobase, nucleoside, nucleotide and nucleic acid metabolism (GO:0019219)
P51970	NDUFA8	NADH dehydrogenase [ubiquinone] 1 alpha subcomplex subunit 8 (Complex I-19kD) (CI-19kD) (Complex I-PGIV) (CI-PGIV) (NADH-ubiquinone oxidoreductase 19 kDa subunit)	2	3	1.28669	0.363663	1.18749	0.247913	0.297264	0.674197	0.0790368		0.852327	0.9965	3.48837	null	Metabolism (GO:0008152); Energy pathways (GO:0006091)
P06576	ATP5B	ATP synthase subunit beta, mitochondrial (EC 3.6.3.14)	61	214	1.28721	0.364242	1.18796	0.248492	0.29807	0.673365	0.078966		0.852327	1	55.3875	null	Metabolism (GO:0008152); Energy pathways (GO:0006091)
Q9UI15	TAGLN3	Transgelin-3 (Neuronal protein 22) (NP22) (Neuronal protein NP25)	25	66	1.28825	0.365407	1.18892	0.249657	0.29969	0.671693	0.0787535		0.85206	1	64.3216	null	Biological_process unknown (GO:0000004)
P14621	ACYP2	Acylphosphatase-2 (EC 3.6.1.7) (Acylphosphatase, muscle type isozyme) (Acylphosphate phosphohydrolase 2)	6	11	1.29061	0.368048	1.1911	0.252298	0.303363	0.667908	0.0786827		0.848863	1	51.5152	null	Metabolism (GO:0008152); Energy pathways (GO:0006091)
B7Z9X4	NDRG4	Protein NDRG4 (cDNA, FLJ78988, highly similar to Protein NDRG4)	5	8	1.29107	0.368567	1.19153	0.252817	0.304085	0.667166	0.0786119		0.848683	1	12.3239	Q9ULP0	Cell differentiation (GO:0030154)
A0A0D9SF54	SPTAN1	Spectrin alpha chain, non-erythrocytic 1	220	512	1.2914	0.368934	1.19183	0.253184	0.304596	0.66664	0.0785411		0.848683	1	54.1311	null	Cell growth and/or maintenance (GO:0008151)
P11142	HSPA8	Heat shock cognate 71 kDa protein (Heat shock 70 kDa protein 8) (Lipopolysaccharide-associated protein 1) (LAP-1) (LPS-associated protein 1)	81	234	1.29185	0.369439	1.19225	0.253689	0.305298	0.665918	0.0783994		0.848683	1	47.3684	null	Protein metabolism (GO:0019538)
E9PK25	CFL1	Cofilin-1	17	35	1.29359	0.371385	1.19386	0.255635	0.308005	0.663138	0.0781161		0.848269	1	45.5882	P23528	Cell growth and/or maintenance (GO:0008151)
Q8IVA1	PCP2	Purkinje cell protein 2 homolog	13	27	1.29489	0.372824	1.19505	0.257074	0.310007	0.661085	0.0780453		0.847053	1	61.0294	null	Signal transduction (GO:0007165); Cell communication (GO:0007154)
P36542	ATP5C1	ATP synthase subunit gamma, mitochondrial (F-ATPase gamma subunit)	7	10	1.29648	0.374605	1.19653	0.258855	0.312483	0.658549	0.0776912		0.847053	1	11.4094	null	Metabolism (GO:0008152); Energy pathways (GO:0006091)
E7EX90	DCTN1	Dynactin subunit 1	3	3	1.29804	0.37634	1.19797	0.26059	0.314897	0.65608	0.0774788		0.846132	1	2.78662	Q14203	Transport (GO:0006810)
P67809	YBX1	Nuclease-sensitive element-binding protein 1 (CCAAT-binding transcription factor I subunit A) (CBF-A) (DNA-binding protein B) (DBPB) (Enhancer factor I subunit A) (EFI-A) (Y-box transcription factor) (Y-box-binding protein 1) (YB-1)	7	13	1.2997	0.378181	1.1995	0.262431	0.317457	0.653467	0.0772663		0.845386	1	33.9506	null	Regulation of nucleobase, nucleoside, nucleotide and nucleic acid metabolism (GO:0019219)
Q96CX2	KCTD12	BTB/POZ domain-containing protein KCTD12 (Pfetin) (Predominantly fetal expressed T1 domain)	19	32	1.30027	0.378815	1.20003	0.263065	0.318339	0.652567	0.0771955		0.845343	1	40.3077	null	Transport (GO:0006810)
Q9H0Q3	FXYD6	FXYD domain-containing ion transport regulator 6 (Phosphohippolin)	2	8	1.30033	0.378883	1.20008	0.263133	0.318433	0.652471	0.0771246		0.845343	1	26.3158	null	Transport (GO:0006810)
P22695	UQCRC2	Cytochrome b-c1 complex subunit 2, mitochondrial (Complex III subunit 2) (Core protein II) (Ubiquinol-cytochrome-c reductase complex core protein 2)	24	56	1.30114	0.379778	1.20083	0.264028	0.319679	0.651201	0.076983		0.845271	1	35.5408	null	Metabolism (GO:0008152); Energy pathways (GO:0006091)
B0QYK0	EWSR1	RNA-binding protein EWS	5	6	1.30163	0.380322	1.20128	0.264572	0.320435	0.650431	0.0768414		0.845271	1	8.57605	Q01844	Regulation of nucleobase, nucleoside, nucleotide and nucleic acid metabolism (GO:0019219)
E7EWR4	CSTF2	Cleavage stimulation factor subunit 2	5	8	1.30338	0.382262	1.2029	0.266512	0.323134	0.647685	0.0764873		0.845271	1	11.8928	null	Regulation of nucleobase, nucleoside, nucleotide and nucleic acid metabolism (GO:0019219)
P49458	SRP9	Signal recognition particle 9 kDa protein (SRP9)	3	5	1.30498	0.384032	1.20437	0.268282	0.325595	0.645185	0.076204		0.845271	1	17.4419	null	Protein metabolism (GO:0019538)
P02675	FGB	Fibrinogen beta chain [Cleaved into: Fibrinopeptide B; Fibrinogen beta chain]	7	13	1.30636	0.385549	1.20564	0.269799	0.327705	0.643045	0.0761331		0.844633	1	18.9409	null	Protein metabolism (GO:0019538)
C9IZW8	NDUFB2	NADH dehydrogenase [ubiquinone] 1 beta subcomplex subunit 2, mitochondrial	2	3	1.30803	0.387401	1.20719	0.271651	0.330281	0.640437	0.0759207		0.843561	1	11.5385	C9JXM4 H7C5B8 O95178	Metabolism (GO:0008152); Energy pathways (GO:0006091)
D6RD67	MCCC2	Methylcrotonoyl-CoA carboxylase beta chain, mitochondrial (Fragment)	2	4	1.30928	0.388771	1.20834	0.273021	0.332187	0.63851	0.0758499		0.841808	1	3.14685	Q9HCC0	Metabolism (GO:0008152); Energy pathways (GO:0006091)
E7EQT4	ACIN1	Apoptotic chromatin condensation inducer in the nucleus	9	16	1.30986	0.389415	1.20887	0.273665	0.333082	0.637606	0.075779		0.841402	1	8.83935	Q9UKV3 S4R3H4	Regulation of nucleobase, nucleoside, nucleotide and nucleic acid metabolism (GO:0019219)
A0A0D9SGF6	SPTAN1	Spectrin alpha chain, non-erythrocytic 1	227	527	1.31141	0.39112	1.2103	0.27537	0.335453	0.635213	0.0756374		0.839284	1	53.9632	null	Cell growth and/or maintenance (GO:0008151)
P09543	CNP	2',3'-cyclic-nucleotide 3'-phosphodiesterase (CNP) (CNPase) (EC 3.1.4.37)	19	37	1.31213	0.391916	1.21097	0.276166	0.33656	0.634097	0.0754249		0.839284	1	29.2162	null	Metabolism (GO:0008152); Energy pathways (GO:0006091)
P22676	CALB2	Calretinin (CR) (29 kDa calbindin)	26	47	1.31378	0.393723	1.21249	0.277973	0.339074	0.631567	0.0752833		0.83892	1	51.2915	null	Cell communication (GO:0007154); Signal transduction (GO:0007165)
P17302	GJA1	Gap junction alpha-1 protein (Connexin-43) (Cx43) (Gap junction 43 kDa heart protein)	6	11	1.31778	0.398108	1.21618	0.282358	0.345172	0.625445	0.075		0.833927	1	19.6335	null	Transport (GO:0006810)
Q5TBR0	NANS	Sialic acid synthase (Fragment)	2	2	1.32059	0.401181	1.21877	0.285431	0.349447	0.62117	0.0745751		0.831775	1	15.6522	Q5TBR1 Q9NR45	Metabolism (GO:0008152); Energy pathways (GO:0006091)
P28838	LAP3	Cytosol aminopeptidase (EC 3.4.11.1) (Leucine aminopeptidase 3) (LAP-3) (Leucyl aminopeptidase) (Peptidase S) (Proline aminopeptidase) (EC 3.4.11.5) (Prolyl aminopeptidase)	8	13	1.32247	0.403236	1.22051	0.287486	0.352306	0.618318	0.0745042		0.82991	1	18.3044	null	Protein metabolism (GO:0019538)
P31937	HIBADH	3-hydroxyisobutyrate dehydrogenase, mitochondrial (HIBADH) (EC 1.1.1.31)	6	9	1.32343	0.404286	1.2214	0.288536	0.353765	0.616864	0.0744334		0.828746	1	13.3929	null	Metabolism (GO:0008152); Energy pathways (GO:0006091)
Q8N3J6	CADM2	Cell adhesion molecule 2 (Immunoglobulin superfamily member 4D) (IgSF4D) (Nectin-like protein 3) (NECL-3) (Synaptic cell adhesion molecule 2) (SynCAM 2)	6	10	1.32356	0.404428	1.22152	0.288678	0.353963	0.616667	0.0743626		0.828746	1	14.2529	null	Cell communication (GO:0007154); Signal transduction (GO:0007165)
A0A1B0GV05	RAP1GAP2	Rap1 GTPase-activating protein 2	2	6	1.32511	0.406108	1.22294	0.290358	0.356299	0.614343	0.0741501		0.828021	1	1.55642	Q684P5	Cell communication (GO:0007154); Signal transduction (GO:0007165)
P68032	ACTC1	Actin, alpha cardiac muscle 1 (Alpha-cardiac actin)	52	198	1.32537	0.406397	1.22319	0.290647	0.356701	0.613944	0.0740793		0.828021	1	37.931	P68133	Cell growth and/or maintenance (GO:0008151)
P39019	RPS19	40S ribosomal protein S19 (Small ribosomal subunit protein eS19)	8	11	1.32748	0.408695	1.22514	0.292945	0.359898	0.610771	0.0737252		0.827811	1	37.931	null	Protein metabolism (GO:0019538)
K7ER00	FARSA	Phenylalanine--tRNA ligase alpha subunit	1	1	1.32867	0.409978	1.22623	0.294228	0.361683	0.609003	0.0736544		0.826839	0.9029	2.55474	Q9Y285	Protein metabolism (GO:0019538)
A0A0C4DFZ1	STX1A	Syntaxin-1A	14	35	1.32939	0.410762	1.2269	0.295012	0.362773	0.607925	0.0735836		0.826169	1	33.0769	A8MZ54 Q16623	Cell communication (GO:0007154); Signal transduction (GO:0007165)
O95989	NUDT3	Diphosphoinositol polyphosphate phosphohydrolase 1 (DIPP-1) (EC 3.6.1.52) (Diadenosine 5',5'''-P1,P6-hexaphosphate hydrolase 1) (EC 3.6.1.-) (Nucleoside diphosphate-linked moiety X motif 3) (Nudix motif 3)	4	8	1.33042	0.411878	1.22784	0.296128	0.364325	0.60639	0.0735127		0.824878	1	23.8372	null	Metabolism (GO:0008152); Energy pathways (GO:0006091)
O60927	PPP1R11	Protein phosphatase 1 regulatory subunit 11 (Hemochromatosis candidate gene V protein) (HCG V) (Protein phosphatase inhibitor 3)	5	8	1.33302	0.414696	1.23024	0.298946	0.368244	0.602523	0.0733003		0.821301	1	21.4286	Q5SRK2	Biological_process unknown (GO:0000004)
F8W1A4	AK2	Adenylate kinase 2, mitochondrial (AK 2) (EC 2.7.4.3) (ATP-AMP transphosphorylase 2) (ATP:AMP phosphotransferase) (Adenylate monophosphate kinase)	9	13	1.33381	0.415555	1.23098	0.299805	0.36944	0.601345	0.0732295		0.82118	1	28.4483	P54819	Metabolism (GO:0008152); Energy pathways (GO:0006091)
E7EWD3	ADAM23	Disintegrin and metalloproteinase domain-containing protein 23	3	6	1.33582	0.417729	1.23283	0.301979	0.372463	0.598372	0.073017		0.818819	1	3.36539	O75077	Protein metabolism (GO:0019538)
H7BY57	NFASC	Neurofascin (Fragment)	49	103	1.34061	0.42289	1.23725	0.30714	0.379641	0.591341	0.0725212		0.815404	1	35.1585	null	Cell communication (GO:0007154); Signal transduction (GO:0007165)
H3BPK3	HAGH	Hydroxyacylglutathione hydrolase, mitochondrial (Fragment)	5	10	1.34133	0.423668	1.23792	0.307918	0.380723	0.590285	0.0723796		0.815404	1	11.7155	Q16775	Metabolism (GO:0008152); Energy pathways (GO:0006091)
E5RJX3	MTSS1	Metastasis suppressor protein 1 (Fragment)	1	2	1.34344	0.425937	1.23987	0.310187	0.383879	0.587208	0.0721671		0.813677	0.9717	5.31401	E7EWW5 H0YAZ8 H0YB53 O43312	Cell growth and/or maintenance (GO:0008151)
Q9Y5J7	TIMM9	Mitochondrial import inner membrane translocase subunit Tim9	5	8	1.34521	0.427829	1.2415	0.312079	0.38651	0.584648	0.0719547		0.812349	1	43.8202	null	Cell growth and/or maintenance (GO:0008151)
Q6ZVM7	TOM1L2	TOM1-like protein 2 (Target of Myb-like protein 2)	10	13	1.34623	0.428921	1.24244	0.313171	0.388029	0.583173	0.0718839		0.811272	1	21.3018	null	Transport (GO:0006810)
Q02952	AKAP12	A-kinase anchor protein 12 (AKAP-12) (A-kinase anchor protein 250 kDa) (AKAP 250) (Gravin) (Myasthenia gravis autoantigen)	49	97	1.35065	0.433649	1.24651	0.317899	0.394606	0.576806	0.071813		0.803205	1	23.4007	null	Cell growth and/or maintenance (GO:0008151)
X6RKN2	NFASC	Neurofascin (Fragment)	49	97	1.35204	0.435138	1.2478	0.319388	0.396676	0.574808	0.0717422		0.801213	1	32.7897	null	Cell communication (GO:0007154); Signal transduction (GO:0007165)
P07205	PGK2	Phosphoglycerate kinase 2 (EC 2.7.2.3) (Phosphoglycerate kinase, testis specific)	11	30	1.35266	0.435799	1.24837	0.320049	0.397596	0.573921	0.0716714		0.800767	0.9883	15.1079	null	Metabolism (GO:0008152); Energy pathways (GO:0006091)
O60869	EDF1	Endothelial differentiation-related factor 1 (EDF-1) (Multiprotein-bridging factor 1) (MBF1)	6	11	1.35594	0.439299	1.2514	0.323549	0.402463	0.569241	0.0715297		0.795583	1	23.6486	null	Regulation of nucleobase, nucleoside, nucleotide and nucleic acid metabolism (GO:0019219)
Q9UD71	PPP1R1B	Protein phosphatase 1 regulatory subunit 1B (DARPP-32) (Dopamine- and cAMP-regulated neuronal phosphoprotein)	10	21	1.35683	0.440243	1.25222	0.324493	0.403777	0.567981	0.0714589		0.794836	1	45.5882	null	Signal transduction (GO:0007165)
B7ZC39	SH3GLB2	Endophilin-B2	15	22	1.35757	0.44103	1.25291	0.32528	0.404871	0.566933	0.0713173		0.794258	1	36.631	null	Biological_process unknown (GO:0000004)
G5EA42	TMOD2	Tropomodulin 2 (Neuronal), isoform CRA_a (Tropomodulin-2)	10	28	1.36135	0.445034	1.25639	0.329284	0.410441	0.561611	0.0708924		0.792202	1	28.6645	Q9NZR1	Cell growth and/or maintenance (GO:0008151)
P31153	MAT2A	S-adenosylmethionine synthase isoform type-2 (AdoMet synthase 2) (EC 2.5.1.6) (Methionine adenosyltransferase 2) (MAT 2) (Methionine adenosyltransferase II) (MAT-II)	6	10	1.362	0.445727	1.25699	0.329977	0.411404	0.560693	0.0706799		0.792202	1	12.4051	null	Metabolism (GO:0008152); Energy pathways (GO:0006091)
Q9UN36	NDRG2	Protein NDRG2 (N-myc downstream-regulated gene 2 protein) (Protein Syld709613)	22	72	1.36213	0.445863	1.25711	0.330113	0.411593	0.560512	0.0706091		0.792202	1	39.0836	null	Cell proliferation (GO:0008283); Cell differentiation (GO:0030154)
P16870	CPE	Carboxypeptidase E (CPE) (EC 3.4.17.10) (Carboxypeptidase H) (CPH) (Enkephalin convertase) (Prohormone-processing carboxypeptidase)	10	16	1.36442	0.448286	1.25923	0.332536	0.414964	0.557306	0.0704674		0.790871	1	24.5798	null	Protein metabolism (GO:0019538)
C9JV77	AHSG	Alpha-2-HS-glycoprotein	3	4	1.36466	0.448544	1.25945	0.332794	0.415322	0.556966	0.0703966		0.790871	1	11.9565	P02765	Cell communication (GO:0007154); Signal transduction (GO:0007165)
B1AM21	GNAQ	Guanine nucleotide-binding protein G(q) subunit alpha (Fragment)	2	2	1.36564	0.449581	1.26036	0.333831	0.416765	0.555596	0.0703258		0.790032	0.9994	16.4706	P50148	Cell communication (GO:0007154); Signal transduction (GO:0007165)
J3QRS3	MYL12A	Myosin regulatory light chain 12A (Myosin regulatory light chain MRCL3, isoform CRA_b)	5	5	1.36936	0.453505	1.26379	0.337755	0.422222	0.550432	0.0699717		0.785881	1	23.1638	O14950 P19105	Cell communication (GO:0007154); Signal transduction (GO:0007165)
P35579	MYH9	Myosin-9 (Cellular myosin heavy chain, type A) (Myosin heavy chain 9) (Myosin heavy chain, non-muscle IIa) (Non-muscle myosin heavy chain A) (NMMHC-A) (Non-muscle myosin heavy chain IIa) (NMMHC II-a) (NMMHC-IIA)	10	13	1.37119	0.455424	1.26547	0.339674	0.424891	0.547916	0.06983		0.784413	1	7.5	null	Cell growth and/or maintenance (GO:0008151)
Q9Y6I3	EPN1	Epsin-1 (EH domain-binding mitotic phosphoprotein) (EPS-15-interacting protein 1)	11	28	1.37377	0.458135	1.26785	0.342385	0.428662	0.544369	0.0695467		0.78208	1	23.4375	null	Cell communication (GO:0007154); Signal transduction (GO:0007165)
H7BYN3	TFAM	Transcription factor A, mitochondrial (Fragment)	6	10	1.37866	0.463262	1.27236	0.347512	0.435792	0.537694	0.0693343		0.77551	1	23.7443	Q00059	Regulation of nucleobase, nucleoside, nucleotide and nucleic acid metabolism (GO:0019219)
A2A283	SYNGR1	Synaptogyrin-1	2	6	1.38194	0.466691	1.27539	0.350941	0.440563	0.533252	0.069051		0.772258	1	10.1695	B5MCD7 F8WCE4 O43759	Transport (GO:0006810)
Q15599	SLC9A3R2	Na(+)/H(+) exchange regulatory cofactor NHE-RF2 (NHERF-2) (NHE3 kinase A regulatory protein E3KARP) (SRY-interacting protein 1) (SIP-1) (Sodium-hydrogen exchanger regulatory factor 2) (Solute carrier family 9 isoform A3 regulatory factor 2) (Tyrosine kina	11	14	1.38267	0.467459	1.27607	0.351709	0.441631	0.53226	0.0689802		0.771613	1	23.7389	null	Cell communication (GO:0007154); Signal transduction (GO:0007165)
J3KQA0	SYT1	Synaptotagmin I, isoform CRA_b (Synaptotagmin-1)	26	65	1.3859	0.470824	1.27905	0.355075	0.446311	0.527923	0.0688385		0.766901	1	33.4129	P21579	Cell communication (GO:0007154); Signal transduction (GO:0007165)
P35580	MYH10	Myosin-10 (Cellular myosin heavy chain, type B) (Myosin heavy chain 10) (Myosin heavy chain, non-muscle IIb) (Non-muscle myosin heavy chain B) (NMMHC-B) (Non-muscle myosin heavy chain IIb) (NMMHC II-b) (NMMHC-IIB)	11	16	1.38673	0.471683	1.27981	0.355933	0.447505	0.52682	0.0686969		0.766788	1	5.36437	null	Cell growth and/or maintenance (GO:0008151)
A0A0J9YX34	TRIM2	Tripartite motif-containing protein 2	5	10	1.3918	0.476954	1.2845	0.361204	0.454837	0.52007	0.0680595		0.763893	1	10.4563	Q9C040	Biological_process unknown (GO:0000004)
P61026	RAB10	Ras-related protein Rab-10	4	9	1.39192	0.477079	1.28461	0.36133	0.455011	0.519911	0.0679887		0.763893	1	13	null	Cell communication (GO:0007154); Signal transduction (GO:0007165)
E9PLK3	NPEPPS	Aminopeptidase (EC 3.4.11.-)	10	15	1.39293	0.478123	1.28554	0.362373	0.456462	0.51858	0.0677762		0.763893	1	11.2568	P55786	Protein metabolism (GO:0019538)
A2A274	ACO2	Aconitate hydratase, mitochondrial	34	84	1.3938	0.479028	1.28635	0.363278	0.457721	0.517428	0.0677054		0.763893	1	27.205	Q99798	Metabolism (GO:0008152); Energy pathways (GO:0006091)
P17174	GOT1	Aspartate aminotransferase, cytoplasmic (cAspAT) (EC 2.6.1.1) (EC 2.6.1.3) (Cysteine aminotransferase, cytoplasmic) (Cysteine transaminase, cytoplasmic) (cCAT) (Glutamate oxaloacetate transaminase 1) (Transaminase A)	27	62	1.39485	0.48011	1.28731	0.36436	0.459227	0.516051	0.0676346		0.762999	1	38.4988	null	Metabolism (GO:0008152); Energy pathways (GO:0006091)
E9PHY5	EPB41L2	Band 4.1-like protein 2	10	18	1.39489	0.480156	1.28735	0.364406	0.45929	0.515993	0.0675637		0.762999	1	9.94652	null	Cell communication (GO:0007154); Signal transduction (GO:0007165)
Q9NSC5	HOMER3	Homer protein homolog 3 (Homer-3)	11	19	1.3988	0.484193	1.29096	0.368443	0.464906	0.510875	0.0672805		0.759321	1	23.8227	null	Cell communication (GO:0007154); Signal transduction (GO:0007165)
P30038	ALDH4A1	Delta-1-pyrroline-5-carboxylate dehydrogenase, mitochondrial (P5C dehydrogenase) (EC 1.2.1.88) (Aldehyde dehydrogenase family 4 member A1) (L-glutamate gamma-semialdehyde dehydrogenase)	7	10	1.39893	0.484319	1.29107	0.368569	0.46508	0.510716	0.0672096		0.759321	1	13.4991	null	Metabolism (GO:0008152); Energy pathways (GO:0006091)
P51674	GPM6A	Neuronal membrane glycoprotein M6-a (M6a)	14	41	1.40039	0.485827	1.29242	0.370077	0.467178	0.508812	0.0668555		0.759321	1	17.2662	null	Neurogenesis (GO:0007399)
E7EQL5	DYNC1I2	Cytoplasmic dynein 1 intermediate chain 2 (Fragment)	5	10	1.40136	0.486827	1.29332	0.371077	0.468569	0.507551	0.0667139		0.759321	1	20.6557	E7EQU2 E7ETL8 E7EV09 E9PGG1	Cell growth and/or maintenance (GO:0008151)
K7EM49	PGD	6-phosphogluconate dehydrogenase, decarboxylating (Fragment)	6	8	1.40298	0.488498	1.29482	0.372748	0.470893	0.505447	0.0665722		0.759247	1	25.8537	K7EMN2 P52209	Metabolism (GO:0008152); Energy pathways (GO:0006091)
Q15149	PLEC	Plectin (PCN) (PLTN) (Hemidesmosomal protein 1) (HD1) (Plectin-1)	61	92	1.40463	0.490194	1.29634	0.374444	0.473252	0.503317	0.066289		0.75896	1	11.2938	null	Cytoskeletal anchoring (GO:0007016)
Q9NZ45	CISD1	CDGSH iron-sulfur domain-containing protein 1 (MitoNEET)	13	29	1.40534	0.490918	1.29699	0.375168	0.474258	0.50241	0.0661473		0.75896	1	43.5185	null	Biological_process unknown (GO:0000004)
P23246	SFPQ	Splicing factor, proline- and glutamine-rich (100 kDa DNA-pairing protein) (hPOMp100) (DNA-binding p52/p100 complex, 100 kDa subunit) (Polypyrimidine tract-binding protein-associated-splicing factor) (PSF) (PTB-associated-splicing factor)	30	56	1.40807	0.493717	1.29951	0.377967	0.478152	0.498908	0.065864		0.757482	1	27.157	null	Regulation of nucleobase, nucleoside, nucleotide and nucleic acid metabolism (GO:0019219)
A0A087X1N7	NEB	Nebulin	2	2	1.41073	0.496437	1.30196	0.380687	0.481935	0.495518	0.0657224		0.753847	0.9959	0.373832	P20929	Cell growth and/or maintenance (GO:0008151)
O43678	NDUFA2	NADH dehydrogenase [ubiquinone] 1 alpha subcomplex subunit 2 (Complex I-B8) (CI-B8) (NADH-ubiquinone oxidoreductase B8 subunit)	6	12	1.41278	0.498538	1.30386	0.382789	0.484858	0.492907	0.0655807		0.751604	1	42.4242	null	Metabolism (GO:0008152); Energy pathways (GO:0006091)
D6R938	CAMK2D	Calcium/calmodulin-dependent protein kinase (CaM kinase) II delta, isoform CRA_e (Calcium/calmodulin-dependent protein kinase type II subunit delta)	2	3	1.41396	0.499738	1.30494	0.383988	0.486526	0.49142	0.0654391		0.750958	0.9875	4.01606	E9PBG7 E9PF82 H0Y9J2 Q13557	Regulation of cell growth (GO:0001558)
E9PFP8	PCBP3	Poly(rC)-binding protein 3	5	14	1.41463	0.500423	1.30556	0.384673	0.487479	0.490572	0.0653683		0.750474	1	10.8033	J3QT27 P57721	Regulation of nucleobase, nucleoside, nucleotide and nucleic acid metabolism (GO:0019219)
A0A0A0MSM0	HSPH1	Heat shock protein 105 kDa	3	3	1.41563	0.501448	1.30649	0.385698	0.488905	0.489304	0.0651558		0.750474	0.9976	2.8133	Q92598	Protein metabolism (GO:0019538)
Q9UBC2	EPS15L1	Epidermal growth factor receptor substrate 15-like 1 (Eps15-related protein) (Eps15R)	11	16	1.4157	0.501518	1.30656	0.385768	0.489002	0.489218	0.065085		0.750474	1	18.8657	null	Cell communication (GO:0007154); Signal transduction (GO:0007165)
P12532	CKMT1A	Creatine kinase U-type, mitochondrial (EC 2.7.3.2) (Acidic-type mitochondrial creatine kinase) (Mia-CK) (Ubiquitous mitochondrial creatine kinase) (U-MtCK)	56	145	1.41785	0.503706	1.30854	0.387956	0.492044	0.486519	0.0647309		0.749771	1	55.3957	null	Energy pathways (GO:0006091)
P53999	SUB1	Activated RNA polymerase II transcriptional coactivator p15 (Positive cofactor 4) (PC4) (SUB1 homolog) (p14)	6	17	1.41896	0.504837	1.30956	0.389087	0.493618	0.485127	0.0646601		0.749771	1	31.4961	null	Regulation of nucleobase, nucleoside, nucleotide and nucleic acid metabolism (GO:0019219)
Q92561	PHYHIP	Phytanoyl-CoA hydroxylase-interacting protein (Phytanoyl-CoA hydroxylase-associated protein 1) (PAHX-AP1) (PAHXAP1)	7	13	1.4205	0.506402	1.31099	0.390652	0.495794	0.483204	0.0644476		0.748839	1	14.2424	null	Biological_process unknown (GO:0000004)
P48735	IDH2	Isocitrate dehydrogenase [NADP], mitochondrial (IDH) (EC 1.1.1.42) (ICD-M) (IDP) (NADP(+)-specific ICDH) (Oxalosuccinate decarboxylase)	6	7	1.42143	0.507346	1.31184	0.391596	0.497107	0.482046	0.0642351		0.748839	1	16.1504	null	Metabolism (GO:0008152); Energy pathways (GO:0006091)
K7EJB8	PPP1R14A	Protein phosphatase 1 regulatory subunit 14A	3	4	1.42275	0.508678	1.31306	0.392928	0.498961	0.480414	0.0640227		0.748839	1	30.5785	K7EMN0 Q96A00	Cell communication (GO:0007154); Signal transduction (GO:0007165)
C9JJX6	ARVCF	Armadillo repeat protein deleted in velo-cardio-facial syndrome	2	2	1.42329	0.509232	1.31356	0.393482	0.499731	0.479737	0.0639518		0.748839	0.9956	4.47928	E9PDC3 O00192	Cell growth and/or maintenance (GO:0008151)
H7BYY1	TPM1	Tropomyosin 1 (Alpha), isoform CRA_m (Tropomyosin alpha-1 chain)	37	88	1.4241	0.510051	1.31431	0.394301	0.50087	0.478736	0.063881		0.748839	1	59.2742	null	Cell growth and/or maintenance (GO:0008151)
E7EQG2	EIF4A2	Eukaryotic initiation factor 4A-II	8	13	1.425	0.510962	1.31514	0.395212	0.502137	0.477624	0.0638102		0.748507	1	19.337	Q14240	Protein metabolism (GO:0019538)
H7BZ94	P4HB	Protein disulfide-isomerase	24	39	1.42505	0.511012	1.31518	0.395262	0.502206	0.477563	0.0637394		0.748507	1	49.569	P07237	Protein metabolism (GO:0019538)
A0A075B7B5	SRGAP2	SLIT-ROBO Rho GTPase-activating protein 2	2	3	1.4267	0.51268	1.3167	0.39693	0.504526	0.475532	0.0635269		0.748305	1	1.26743	A2RUF3 B7ZM87 O75044 P0DJJ0 P0DMP2	Cell communication (GO:0007154); Signal transduction (GO:0007165)
F5H7S3	TPM1	Tropomyosin alpha-1 chain	40	96	1.42854	0.514541	1.3184	0.398791	0.507115	0.47327	0.0633853		0.746656	1	64.0816	null	Cell growth and/or maintenance (GO:0008151)
O94811	TPPP	Tubulin polymerization-promoting protein (TPPP) (25 kDa brain-specific protein) (TPPP/p25) (p24) (p25-alpha)	29	79	1.43042	0.516438	1.32014	0.400688	0.509754	0.470971	0.0632436		0.744693	1	53.8813	null	Cell growth and/or maintenance (GO:0008151)
Q92905	COPS5	COP9 signalosome complex subunit 5 (SGN5) (Signalosome subunit 5) (EC 3.4.-.-) (Jun activation domain-binding protein 1)	3	6	1.43184	0.517872	1.32145	0.402122	0.511748	0.469237	0.063102		0.743617	1	5.68862	null	Protein metabolism (GO:0019538)
Q9UFM8	DKFZp566H1924	Neuroplastin (Putative uncharacterized protein DKFZp566H1924) (Fragment)	22	50	1.4325	0.518537	1.32206	0.402787	0.512672	0.468435	0.0630312		0.74318	1	36.6883	Q9Y639	Immune response (GO:0006955)
Q9NQC3	RTN4	Reticulon-4 (Foocen) (Neurite outgrowth inhibitor) (Nogo protein) (Neuroendocrine-specific protein) (NSP) (Neuroendocrine-specific protein C homolog) (RTN-x) (Reticulon-5)	27	54	1.43271	0.518751	1.32226	0.403001	0.512971	0.468176	0.0629603		0.74318	1	24.1611	null	Regulation of cell growth (GO:0001558)
H3BNQ7	ABAT	4-aminobutyrate aminotransferase, mitochondrial	7	13	1.43694	0.523003	1.32616	0.407253	0.518884	0.463063	0.0625354		0.739691	1	14.3689	H3BRN4 P80404	Metabolism (GO:0008152); Energy pathways (GO:0006091)
P36543	ATP6V1E1	V-type proton ATPase subunit E 1 (V-ATPase subunit E 1) (V-ATPase 31 kDa subunit) (p31) (Vacuolar proton pump subunit E 1)	18	44	1.43699	0.523048	1.3262	0.407298	0.518947	0.463009	0.0624646		0.739691	1	47.7876	null	Transport (GO:0006810)
J3QT56	HYPK	Huntingtin-interacting protein K	2	2	1.43719	0.523253	1.32639	0.407504	0.519233	0.462762	0.0623938		0.739691	0.9986	13.4146	Q9NX55	Biological_process unknown (GO:0000004)
P35219	CA8	Carbonic anhydrase-related protein (CARP) (Carbonic anhydrase VIII) (CA-VIII)	6	10	1.43733	0.523389	1.32651	0.407639	0.519422	0.462599	0.0623229		0.739691	1	23.4483	null	Metabolism (GO:0008152); Energy pathways (GO:0006091)
Q01082	SPTBN1	Spectrin beta chain, non-erythrocytic 1 (Beta-II spectrin) (Fodrin beta chain) (Spectrin, non-erythroid beta chain 1)	130	273	1.43809	0.524151	1.32721	0.408401	0.520481	0.461687	0.0622521		0.739691	1	40.3553	null	Cell growth and/or maintenance (GO:0008151)
Q9NRW1	RAB6B	Ras-related protein Rab-6B	12	20	1.44124	0.527315	1.33013	0.411565	0.524882	0.457909	0.0618272		0.73922	1	30.2885	null	Cell communication (GO:0007154); Signal transduction (GO:0007165)
P25325	MPST	3-mercaptopyruvate sulfurtransferase (MST) (EC 2.8.1.2)	3	3	1.44168	0.527753	1.33053	0.412003	0.525491	0.457387	0.0616856		0.73922	1	8.08081	null	Metabolism (GO:0008152); Energy pathways (GO:0006091)
B3KVD8	SYNPR	Synaptoporin (cDNA FLJ16439 fis, clone BRAMY2046109, highly similar to Synaptoporin)	4	10	1.44195	0.528023	1.33078	0.412273	0.525867	0.457066	0.0615439		0.73922	1	8.69565	C9J976 Q8TBG9	Transport (GO:0006810)
Q8N7J2	AMER2	APC membrane recruitment protein 2 (Amer2) (Protein FAM123A)	16	28	1.44439	0.530462	1.33303	0.414712	0.529259	0.454168	0.0612606		0.73922	1	24.5902	null	Biological_process unknown (GO:0000004)
O96000	NDUFB10	NADH dehydrogenase [ubiquinone] 1 beta subcomplex subunit 10 (Complex I-PDSW) (CI-PDSW) (NADH-ubiquinone oxidoreductase PDSW subunit)	6	8	1.4449	0.530974	1.33351	0.415224	0.529971	0.453561	0.0611898		0.73922	1	37.2093	null	Metabolism (GO:0008152); Energy pathways (GO:0006091)
P27824	CANX	Calnexin (IP90) (Major histocompatibility complex class I antigen-binding protein p88) (p90)	14	31	1.44502	0.531088	1.33361	0.415338	0.53013	0.453425	0.061119		0.73922	1	22.2973	null	Protein folding (GO:0006457)
Q71U36	TUBA1A	Tubulin alpha-1A chain (Alpha-tubulin 3) (Tubulin B-alpha-1) (Tubulin alpha-3 chain) [Cleaved into: Detyrosinated tubulin alpha-1A chain]	20	62	1.44667	0.532738	1.33514	0.416988	0.532425	0.451472	0.0610482		0.73922	1	32.816	null	Cell growth and/or maintenance (GO:0008151)
Q14697	GANAB	Neutral alpha-glucosidase AB (EC 3.2.1.84) (Alpha-glucosidase 2) (Glucosidase II subunit alpha)	12	20	1.44677	0.532833	1.33523	0.417083	0.532556	0.451361	0.0609773		0.73922	1	11.6525	null	Carbohydrate metabolism (GO:0005975)
Q8NHG7	SVIP	Small VCP/p97-interacting protein	4	7	1.44836	0.534424	1.3367	0.418674	0.534769	0.449483	0.0609065		0.737988	1	32.4675	null	proteolysis (GO:0006508)
H0Y360	AMPD2	AMP deaminase 2 (Fragment)	4	6	1.45018	0.536228	1.33837	0.420478	0.537279	0.447358	0.0606941		0.737071	1	4.76191	Q01433	Metabolism (GO:0008152); Energy pathways (GO:0006091)
A0A0A6YYC7	ZFP91-CNTF	HCG2042749, isoform CRA_d (Protein ZFP91-CNTF)	1	2	1.4504	0.536448	1.33857	0.420698	0.537584	0.4471	0.0606232		0.737071	0.9149	2.26843	Q96JP5
P20340	RAB6A	Ras-related protein Rab-6A (Rab-6)	11	14	1.45102	0.53707	1.33915	0.42132	0.53845	0.446368	0.0605524		0.737071	1	35.5769	null	Cell communication (GO:0007154); Signal transduction (GO:0007165)
Q13153	PAK1	Serine/threonine-protein kinase PAK 1 (EC 2.7.11.1) (Alpha-PAK) (p21-activated kinase 1) (PAK-1) (p65-PAK)	9	11	1.4511	0.537147	1.33922	0.421397	0.538556	0.446279	0.0604816		0.737071	1	21.8349	null	Cell communication (GO:0007154); Signal transduction (GO:0007165)
B4DJ81	NDUFS1	NADH-ubiquinone oxidoreductase 75 kDa subunit, mitochondrial (cDNA FLJ60586, highly similar to NADH-ubiquinone oxidoreductase 75 kDa subunit, mitochondrial (EC 1.6.5.3))	13	28	1.45175	0.537797	1.33983	0.422047	0.539461	0.445515	0.0604108		0.737071	1	17.0213	P28331	Metabolism (GO:0008152); Energy pathways (GO:0006091)
Q14194	CRMP1	Dihydropyrimidinase-related protein 1 (DRP-1) (Collapsin response mediator protein 1) (CRMP-1) (Unc-33-like phosphoprotein 3) (ULIP-3)	46	116	1.4518	0.537841	1.33987	0.422091	0.539522	0.445464	0.0603399		0.737071	1	52.2727	null	Cell growth and/or maintenance (GO:0008151)
C9J6D1	NAP1L4	Nucleosome assembly protein 1-like 4 (Fragment)	5	9	1.45249	0.538525	1.3405	0.422775	0.540474	0.444661	0.0602691		0.737071	1	29.2135	E9PJJ2 E9PNJ7 E9PNW0 E9PS34 Q99733	Regulation of nucleobase, nucleoside, nucleotide and nucleic acid metabolism (GO:0019219)
E7END7	RAB1A	Ras-related protein Rab-1A	11	18	1.45477	0.54079	1.34261	0.42504	0.543624	0.442012	0.0601983		0.73426	1	30.6358	P62820	Cell communication (GO:0007154); Signal transduction (GO:0007165)
P05141	SLC25A5	ADP/ATP translocase 2 (ADP,ATP carrier protein 2) (ADP,ATP carrier protein, fibroblast isoform) (Adenine nucleotide translocator 2) (ANT 2) (Solute carrier family 25 member 5) [Cleaved into: ADP/ATP translocase 2, N-terminally processed]	8	15	1.45869	0.544675	1.34623	0.428925	0.549027	0.437489	0.0600567		0.72846	1	13.0872	null	Metabolism (GO:0008152); Energy pathways (GO:0006091)
D6RE83	UCHL1	Ubiquitin carboxyl-terminal hydrolase (EC 3.4.19.12)	24	53	1.46294	0.548872	1.35015	0.433122	0.554865	0.432631	0.0596317		0.725504	1	57.4879	P09936	Protein metabolism (GO:0019538)
P07437	TUBB	Tubulin beta chain (Tubulin beta-5 chain)	29	56	1.46398	0.549896	1.35111	0.434146	0.556289	0.431451	0.0595609		0.724386	1	46.3964	Q5JP53	Cell growth and/or maintenance (GO:0008151)
P28072	PSMB6	Proteasome subunit beta type-6 (EC 3.4.25.1) (Macropain delta chain) (Multicatalytic endopeptidase complex delta chain) (Proteasome delta chain) (Proteasome subunit Y)	4	7	1.46647	0.552344	1.35341	0.436594	0.559694	0.428637	0.0594193		0.721377	1	12.9707	null	Protein metabolism (GO:0019538)
Q9UKY7	CDV3	Protein CDV3 homolog	5	8	1.46804	0.553892	1.35486	0.438142	0.561847	0.426863	0.0592776		0.720107	1	43.7985	null	Cell proliferation (GO:0008283)
Q07666	KHDRBS1	KH domain-containing, RNA-binding, signal transduction-associated protein 1 (GAP-associated tyrosine phosphoprotein p62) (Src-associated in mitosis 68 kDa protein) (Sam68) (p21 Ras GTPase-activating protein-associated p62) (p68)	7	10	1.46832	0.554169	1.35512	0.438419	0.562233	0.426545	0.059136		0.720107	1	17.833	null	Regulation of nucleobase, nucleoside, nucleotide and nucleic acid metabolism (GO:0019219)
P28482	MAPK1	Mitogen-activated protein kinase 1 (MAP kinase 1) (MAPK 1) (EC 2.7.11.24) (ERT1) (Extracellular signal-regulated kinase 2) (ERK-2) (MAP kinase isoform p42) (p42-MAPK) (Mitogen-activated protein kinase 2) (MAP kinase 2) (MAPK 2)	7	14	1.46934	0.555166	1.35606	0.439416	0.563619	0.425406	0.0589943		0.720107	1	10.8333	null	Cell communication (GO:0007154); Signal transduction (GO:0007165)
P04792	HSPB1	Heat shock protein beta-1 (HspB1) (28 kDa heat shock protein) (Estrogen-regulated 24 kDa protein) (Heat shock 27 kDa protein) (HSP 27) (Stress-responsive protein 27) (SRP27)	6	12	1.46994	0.555754	1.35661	0.440004	0.564436	0.424735	0.0588527		0.720107	1	34.6341	null	Protein metabolism (GO:0019538)
Q03252	LMNB2	Lamin-B2	57	119	1.47055	0.556356	1.35717	0.440606	0.565274	0.424048	0.0587819		0.720107	1	62.2581	null	Cell growth and/or maintenance (GO:0008151)
P38117	ETFB	Electron transfer flavoprotein subunit beta (Beta-ETF)	11	21	1.47071	0.556509	1.35732	0.440759	0.565487	0.423874	0.058711		0.720107	1	35.6863	null	Metabolism (GO:0008152); Energy pathways (GO:0006091)
P04040	CAT	Catalase (EC 1.11.1.6)	3	5	1.47161	0.557392	1.35815	0.441642	0.566715	0.422868	0.0586402		0.720107	1	4.74383	null	Metabolism (GO:0008152); Energy pathways (GO:0006091)
Q8N9I0	SYT2	Synaptotagmin-2 (Synaptotagmin II) (SytII)	23	60	1.47233	0.558099	1.35882	0.442349	0.567699	0.422063	0.0584986		0.720107	1	37.2315	null	Cell communication (GO:0007154); Signal transduction (GO:0007165)
H9KV31	NCAM2	Neural cell adhesion molecule 2	4	6	1.4724	0.558173	1.35888	0.442423	0.567801	0.421979	0.0584278		0.720107	1	5.98291	O15394	Cell growth and/or maintenance (GO:0008151)
O94919	ENDOD1	Endonuclease domain-containing 1 protein (EC 3.1.30.-)	8	10	1.47256	0.558324	1.35903	0.442574	0.568011	0.421808	0.0583569		0.720107	1	9.2	null	Regulation of nucleobase, nucleoside, nucleotide and nucleic acid metabolism (GO:0019219)
P33316	DUT	Deoxyuridine 5'-triphosphate nucleotidohydrolase, mitochondrial (dUTPase) (EC 3.6.1.23) (dUTP pyrophosphatase)	4	11	1.47305	0.558808	1.35948	0.443058	0.568684	0.421258	0.0582861		0.720107	1	18.6508	null	DNA replication (GO:0006260)
P23284	PPIB	Peptidyl-prolyl cis-trans isomerase B (PPIase B) (EC 5.2.1.8) (CYP-S1) (Cyclophilin B) (Rotamase B) (S-cyclophilin) (SCYLP)	15	27	1.47309	0.55885	1.35952	0.4431	0.568743	0.42121	0.0582153		0.720107	1	45.8333	null	Protein metabolism (GO:0019538)
B4DGM3	SMARCE1	SWI/SNF-related matrix-associated actin-dependent regulator of chromatin subfamily E member 1 (cDNA FLJ55202, highly similar to SWI/SNF-related matrix-associatedactin-dependent regulator of chromatin subfamily E member 1)	2	2	1.48224	0.567776	1.36796	0.452026	0.581157	0.411145	0.0576487		0.71319	0.9999	3.05344	J3KT85 J3QKS7 J3QR61 Q969G3	Regulation of nucleobase, nucleoside, nucleotide and nucleic acid metabolism (GO:0019219)
Q9BVC6	TMEM109	Transmembrane protein 109 (Mitsugumin-23) (Mg23)	3	5	1.48266	0.568186	1.36835	0.452436	0.581728	0.410685	0.0575071		0.71319	1	8.64198	null	Biological_process unknown (GO:0000004)
P05937	CALB1	Calbindin (Calbindin D28) (D-28K) (Vitamin D-dependent calcium-binding protein, avian-type)	14	30	1.48305	0.568563	1.36871	0.452814	0.582253	0.410264	0.0573654		0.71319	1	36.0153	null	Cell communication (GO:0007154); Signal transduction (GO:0007165)
P02671	FGA	Fibrinogen alpha chain [Cleaved into: Fibrinopeptide A; Fibrinogen alpha chain]	9	12	1.4844	0.569883	1.36996	0.454133	0.584089	0.408789	0.0572946		0.71319	1	9.69977	null	Protein metabolism (GO:0019538)
Q14894	CRYM	Ketimine reductase mu-crystallin (EC 1.5.1.25) (NADP-regulated thyroid-hormone-binding protein)	8	12	1.48479	0.57026	1.37032	0.45451	0.584613	0.408369	0.0572238		0.71319	1	27.707	null	Osmoregulation (GO:0018987); Hormone metabolism (GO:0042445)
Q99961	SH3GL1	Endophilin-A2 (EEN fusion partner of MLL) (Endophilin-2) (Extra eleven-nineteen leukemia fusion gene protein) (EEN) (SH3 domain protein 2B) (SH3 domain-containing GRB2-like protein 1)	13	20	1.48776	0.573144	1.37306	0.457394	0.588624	0.405161	0.0570113		0.710667	1	23.3696	null	Cell communication (GO:0007154); Signal transduction (GO:0007165)
Q9GZP4	PITHD1	PITH domain-containing protein 1	9	16	1.49073	0.576016	1.3758	0.460266	0.592618	0.401981	0.0567989		0.707727	1	40.2844	null	Biological_process unknown (GO:0000004)
Q9Y617	PSAT1	Phosphoserine aminotransferase (EC 2.6.1.52) (Phosphohydroxythreonine aminotransferase) (PSAT)	9	15	1.49085	0.576132	1.37591	0.460382	0.592779	0.401853	0.056728		0.707727	1	15.6757	null	Metabolism (GO:0008152); Energy pathways (GO:0006091)
H0YK48	TPM1	Tropomyosin alpha-1 chain	39	91	1.49215	0.577395	1.37711	0.461645	0.594537	0.400459	0.0566572		0.70681	1	65.7258	null	Cell growth and/or maintenance (GO:0008151)
Q15365	PCBP1	Poly(rC)-binding protein 1 (Alpha-CP1) (Heterogeneous nuclear ribonucleoprotein E1) (hnRNP E1) (Nucleic acid-binding protein SUB2.3)	8	17	1.49358	0.57877	1.37842	0.46302	0.596448	0.398946	0.0565156		0.705315	1	17.1348	null	Regulation of nucleobase, nucleoside, nucleotide and nucleic acid metabolism (GO:0019219)
P69891	HBG1	Hemoglobin subunit gamma-1 (Gamma-1-globin) (Hb F Agamma) (Hemoglobin gamma-1 chain) (Hemoglobin gamma-A chain)	5	43	1.49535	0.580487	1.38007	0.464737	0.598837	0.39706	0.0563031		0.705218	1	28.5714	P69892	Transport (GO:0006810)
Q9H3Q1	CDC42EP4	Cdc42 effector protein 4 (Binder of Rho GTPases 4)	21	45	1.49543	0.580556	1.38013	0.464806	0.598932	0.396985	0.0562323		0.705218	1	46.9101	null	Cell growth and/or maintenance (GO:0008151)
Q99614	TTC1	Tetratricopeptide repeat protein 1 (TPR repeat protein 1)	3	5	1.49667	0.581759	1.38128	0.466009	0.600605	0.395667	0.0561615		0.704518	1	5.82192	null	Cell communication (GO:0007154); Signal transduction (GO:0007165)
P49418	AMPH	Amphiphysin	33	70	1.49714	0.582211	1.38172	0.466461	0.601235	0.395172	0.0560907		0.704518	1	46.4748	null	Cell communication (GO:0007154); Signal transduction (GO:0007165)
O60925	PFDN1	Prefoldin subunit 1	5	6	1.50029	0.585241	1.38462	0.469491	0.605449	0.391868	0.0560198		0.699517	1	36.0656	null	Protein metabolism (GO:0019538)
O15020	SPTBN2	Spectrin beta chain, non-erythrocytic 2 (Beta-III spectrin) (Spinocerebellar ataxia 5 protein)	10	16	1.50171	0.586605	1.38593	0.470855	0.607346	0.390386	0.055949		0.697753	1	4.68619	null	Cell growth and/or maintenance (GO:0008151)
E7EQV3	PABPC1	Polyadenylate-binding protein (PABP)	13	16	1.5061	0.59082	1.38999	0.47507	0.613209	0.385828	0.0557365		0.692235	1	22.8426	P11940	Regulation of nucleobase, nucleoside, nucleotide and nucleic acid metabolism (GO:0019219)
O75396	SEC22B	Vesicle-trafficking protein SEC22b (ER-Golgi SNARE of 24 kDa) (ERS-24) (ERS24) (SEC22 vesicle-trafficking protein homolog B) (SEC22 vesicle-trafficking protein-like 1)	3	3	1.50639	0.591096	1.39025	0.475346	0.613593	0.38553	0.0556657		0.692235	1	23.7209	null	Cell communication (GO:0007154); Signal transduction (GO:0007165)
K7EPF6	PGD	6-phosphogluconate dehydrogenase, decarboxylating (Fragment)	5	7	1.50651	0.591214	1.39037	0.475464	0.613756	0.385404	0.0555949		0.692235	0.9999	11.7188	null	Metabolism (GO:0008152); Energy pathways (GO:0006091)
Q02818	NUCB1	Nucleobindin-1 (CALNUC)	4	4	1.5071	0.591778	1.39091	0.476028	0.614541	0.384797	0.0554533		0.692235	1	5.20607	null	Cell communication (GO:0007154); Signal transduction (GO:0007165)
O14737	PDCD5	Programmed cell death protein 5 (TF-1 cell apoptosis-related protein 19) (Protein TFAR19)	7	18	1.5073	0.591969	1.39109	0.476219	0.614806	0.384591	0.0553824		0.692235	1	39.2	null	Apoptosis (GO:0006915)
P12236	SLC25A6	ADP/ATP translocase 3 (ADP,ATP carrier protein 3) (ADP,ATP carrier protein, isoform T2) (ANT 2) (Adenine nucleotide translocator 3) (ANT 3) (Solute carrier family 25 member 6) [Cleaved into: ADP/ATP translocase 3, N-terminally processed]	8	14	1.50839	0.593006	1.39209	0.477256	0.616249	0.383477	0.0553116		0.692235	1	13.0872	null	Transport (GO:0006810)
P38646	HSPA9	Stress-70 protein, mitochondrial (75 kDa glucose-regulated protein) (GRP-75) (Heat shock 70 kDa protein 9) (Mortalin) (MOT) (Peptide-binding protein 74) (PBP74)	46	116	1.50903	0.593624	1.39269	0.477874	0.617109	0.382814	0.05517		0.692235	1	41.8262	null	Protein metabolism (GO:0019538)
P0C7P4	UQCRFS1P1	Putative cytochrome b-c1 complex subunit Rieske-like protein 1 (Ubiquinol-cytochrome c reductase Rieske iron-sulfur subunit pseudogene 1)	7	16	1.51047	0.595002	1.39402	0.479252	0.619025	0.381338	0.0550283		0.692235	1	18.7279	P47985
Q13561	DCTN2	Dynactin subunit 2 (50 kDa dynein-associated polypeptide) (Dynactin complex 50 kDa subunit) (DCTN-50) (p50 dynamitin)	19	36	1.51515	0.599458	1.39833	0.483708	0.625222	0.376589	0.054745		0.687897	1	41.6459	null	Cell growth and/or maintenance (GO:0008151)
P04350	TUBB4A	Tubulin beta-4A chain (Tubulin 5 beta) (Tubulin beta-4 chain)	36	85	1.51731	0.601518	1.40033	0.485768	0.628088	0.374406	0.0546034		0.685683	1	49.5495	null	Cell growth and/or maintenance (GO:0008151)
Q9Y281	CFL2	Cofilin-2 (Cofilin, muscle isoform)	12	27	1.51884	0.602974	1.40175	0.487224	0.630113	0.372868	0.0545326		0.683752	1	49.3976	null	Cytoskeleton organization and biogenesis (GO:0007010)
C9J9W2	LASP1	LIM and SH3 domain protein 1 (Fragment)	10	19	1.51943	0.603528	1.40228	0.487778	0.630883	0.372284	0.0543201		0.683752	1	59.6386	Q14847	Signal transduction (GO:0007165); Regulation of signal transduction (GO:0009966); Cytoskeleton organization and biogenesis (GO:0007010)
Q6F5E8	CARMIL2	Capping protein, Arp2/3 and myosin-I linker protein 2 (Capping protein regulator and myosin 1 linker 2) (F-actin-uncapping protein RLTPR) (Leucine-rich repeat-containing protein 16C) (RGD, leucine-rich repeat, tropomodulin and proline-rich-containing prot	4	4	1.52109	0.605107	1.40382	0.489357	0.63308	0.370621	0.0541785		0.683752	1	4.18118	null	Signal transduction (GO:0007165); Cell communication (GO:0007154)
Q9H6S3	EPS8L2	Epidermal growth factor receptor kinase substrate 8-like protein 2 (EPS8-like protein 2) (Epidermal growth factor receptor pathway substrate 8-related protein 2) (EPS8-related protein 2)	6	11	1.52181	0.605785	1.40448	0.490035	0.634023	0.369909	0.0541076		0.683653	1	9.37063	null	Cell communication (GO:0007154); Signal transduction (GO:0007165)
P07197	NEFM	Neurofilament medium polypeptide (NF-M) (160 kDa neurofilament protein) (Neurofilament 3) (Neurofilament triplet M protein)	66	165	1.52546	0.609242	1.40785	0.493492	0.638831	0.36629	0.0537535		0.681426	1	50.9825	null	Cell growth and/or maintenance (GO:0008151)
Q14011	CIRBP	Cold-inducible RNA-binding protein (A18 hnRNP) (Glycine-rich RNA-binding protein CIRP)	10	15	1.52623	0.609969	1.40856	0.494219	0.639843	0.365532	0.0536827		0.680912	1	52.907	null	Cell communication (GO:0007154); Signal transduction (GO:0007165)
P10909	CLU	Clusterin (Aging-associated gene 4 protein) (Apolipoprotein J) (Apo-J) (Complement cytolysis inhibitor) (CLI) (Complement-associated protein SP-40,40) (Ku70-binding protein 1) (NA1/NA2) (Testosterone-repressed prostate message 2) (TRPM-2) [Cleaved into: C	9	14	1.52712	0.610811	1.40938	0.495061	0.641013	0.364656	0.0536119		0.680177	1	16.2584	null	Immune response (GO:0006955)
P60880	SNAP25	Synaptosomal-associated protein 25 (SNAP-25) (Super protein) (SUP) (Synaptosomal-associated 25 kDa protein)	21	53	1.5274	0.611082	1.40964	0.495332	0.64139	0.364374	0.0535411		0.680177	1	54.3689	null	Transport (GO:0006810)
Q13885	TUBB2A	Tubulin beta-2A chain (Tubulin beta class IIa)	32	66	1.52936	0.612924	1.41145	0.497174	0.643952	0.362461	0.0534703		0.677874	1	51.9101	null	microtubule-based process [GO:0007017]
Q14CZ8	HEPACAM	Hepatocyte cell adhesion molecule (Protein hepaCAM)	14	29	1.52994	0.613477	1.41199	0.497727	0.644721	0.361888	0.0533286		0.677874	1	32.9327	null	Cell communication (GO:0007154); Signal transduction (GO:0007165); Regulation of biological process (GO:0050789); Cell-matrix adhesion (GO:0007160); Cell motility (GO:0006928)
Q8WXD9	CASKIN1	Caskin-1 (CASK-interacting protein 1)	9	17	1.53049	0.61399	1.41249	0.49824	0.645434	0.361357	0.0532578		0.677874	1	7.82669	null	Cell communication (GO:0007154); Signal transduction (GO:0007165)
Q9NUQ9	FAM49B	Protein FAM49B (L1)	7	11	1.53376	0.617075	1.41551	0.501325	0.649725	0.358174	0.0529037		0.676791	1	19.4444	null	Biological_process unknown (GO:0000004)
P63092	GNAS	Guanine nucleotide-binding protein G(s) subunit alpha isoforms short (Adenylate cyclase-stimulating G alpha protein)	6	10	1.53473	0.61798	1.4164	0.502231	0.650985	0.357243	0.0526912		0.676791	1	8.88325	Q5JWF2	Cell communication (GO:0007154); Signal transduction (GO:0007165)
O60784	TOM1	Target of Myb protein 1	4	7	1.53587	0.619058	1.41746	0.503308	0.652484	0.356137	0.0525496		0.676791	1	11.9919	null	Cell communication (GO:0007154); Signal transduction (GO:0007165)
P51572	BCAP31	B-cell receptor-associated protein 31 (BCR-associated protein 31) (Bap31) (6C6-AG tumor-associated antigen) (Protein CDM) (p28)	11	16	1.53965	0.622604	1.42095	0.506855	0.657416	0.352512	0.0523371		0.673542	1	25.6098	null	Transport (GO:0006810)
Q08722	CD47	Leukocyte surface antigen CD47 (Antigenic surface determinant protein OA3) (Integrin-associated protein) (IAP) (Protein MER6) (CD antigen CD47)	6	9	1.54003	0.622962	1.4213	0.507212	0.657913	0.352149	0.0522663		0.673542	1	10.2167	null	Immune response (GO:0006955)
O95169	NDUFB8	NADH dehydrogenase [ubiquinone] 1 beta subcomplex subunit 8, mitochondrial (Complex I-ASHI) (CI-ASHI) (NADH-ubiquinone oxidoreductase ASHI subunit)	11	19	1.54041	0.623318	1.42165	0.507568	0.658409	0.351786	0.0521955		0.673542	1	40.8602	null	Metabolism (GO:0008152); Energy pathways (GO:0006091)
A0A1B0GTX7	KIAA1107	Uncharacterized protein KIAA1107	8	14	1.54157	0.624404	1.42272	0.508654	0.659919	0.350682	0.051983		0.673542	1	6.05613	A0A1B0GUL6 A0A1B0GWG1 E9PEZ5 Q9UPP5	Biological_process unknown (GO:0000004)
A0A087WUV8	BSG	Basigin	8	15	1.54331	0.626032	1.42433	0.510282	0.662184	0.349032	0.0518414		0.673269	1	30.1587	A0A087X2B5 P35613	Cell communication (GO:0007154); Signal transduction (GO:0007165)
Q2M2I8	AAK1	AP2-associated protein kinase 1 (EC 2.7.11.1) (Adaptor-associated kinase 1)	4	5	1.54479	0.627409	1.42569	0.511659	0.664099	0.347639	0.0516997		0.672101	1	5.20291	null	Transport (GO:0006810)
C9JFZ1	SYNJ1	Synaptojanin-1	9	22	1.54932	0.631637	1.42987	0.515887	0.669979	0.343387	0.0516289		0.665106	1	6.96296	J3KPK1	Metabolism (GO:0008152)
H3BLU7	AKR7A2	Aflatoxin B1 aldehyde reductase member 2 (Fragment)	8	12	1.55021	0.632462	1.43069	0.516712	0.671127	0.342561	0.0515581		0.664419	1	13.0573	O43488	Metabolism (GO:0008152); Energy pathways (GO:0006091)
P84103	SRSF3	Serine/arginine-rich splicing factor 3 (Pre-mRNA-splicing factor SRP20) (Splicing factor, arginine/serine-rich 3)	9	13	1.55157	0.633728	1.43195	0.517978	0.672888	0.341296	0.0514873		0.662875	1	47.561	null	Regulation of nucleobase, nucleoside, nucleotide and nucleic acid metabolism (GO:0019219)
P34932	HSPA4	Heat shock 70 kDa protein 4 (HSP70RY) (Heat shock 70-related protein APG-2)	9	17	1.55282	0.634888	1.4331	0.519138	0.674501	0.34014	0.0513456		0.662121	1	8.21429	null	Protein metabolism (GO:0019538)
P00338	LDHA	L-lactate dehydrogenase A chain (LDH-A) (EC 1.1.1.27) (Cell proliferation-inducing gene 19 protein) (LDH muscle subunit) (LDH-M) (Renal carcinoma antigen NY-REN-59)	10	18	1.55835	0.64002	1.43821	0.52427	0.68164	0.335054	0.0509915		0.657078	1	20.4819	null	Metabolism (GO:0008152); Energy pathways (GO:0006091)
A0A0A0MRL6	ABLIM1	Actin-binding LIM protein 1	19	30	1.55886	0.640495	1.43868	0.524745	0.682299	0.334587	0.0509207		0.657074	1	22.252	F8W8M4 O14639	Cell growth and/or maintenance (GO:0008151)
A0A075B7C0	CAPNS1	Calpain small subunit 1 (Fragment)	3	7	1.56045	0.641964	1.44015	0.526215	0.684344	0.33314	0.0508499		0.655145	1	19.797	A0A0C4DGQ5 K7EIV0 K7ELJ7 K7EM73 P04632	Protein folding (GO:0006457)
Q15181	PPA1	Inorganic pyrophosphatase (EC 3.6.1.1) (Pyrophosphate phospho-hydrolase) (PPase)	9	23	1.56052	0.64203	1.44021	0.52628	0.684434	0.333076	0.050779		0.655145	1	21.7993	null	Metabolism (GO:0008152); Energy pathways (GO:0006091)
A0A087WWU8	TPM3	Tropomyosin alpha-3 chain	34	90	1.56259	0.643943	1.44212	0.528193	0.687095	0.3312	0.0506374		0.654062	1	54.6255	null	Cell growth and/or maintenance (GO:0008151)
P16152	CBR1	Carbonyl reductase [NADPH] 1 (EC 1.1.1.184) (15-hydroxyprostaglandin dehydrogenase [NADP(+)]) (EC 1.1.1.197) (NADPH-dependent carbonyl reductase 1) (Prostaglandin 9-ketoreductase) (Prostaglandin-E(2) 9-reductase) (EC 1.1.1.189) (Short chain dehydrogenase/	13	29	1.56268	0.644024	1.4422	0.528274	0.687208	0.331121	0.0505666		0.654062	1	37.9061	null	Metabolism (GO:0008152); Energy pathways (GO:0006091)
O96001	PPP1R17	Protein phosphatase 1 regulatory subunit 17 (G-substrate)	3	3	1.56438	0.645595	1.44377	0.529845	0.689393	0.329585	0.0504249		0.653616	1	20	null	Cell communication (GO:0007154); Signal transduction (GO:0007165)
Q9H9B4	SFXN1	Sideroflexin-1 (Tricarboxylate carrier protein) (TCC)	3	5	1.56443	0.645635	1.44381	0.529885	0.689448	0.329547	0.0503541		0.653616	1	7.76398	null	Transport (GO:0006810)
P26583	HMGB2	High mobility group protein B2 (High mobility group protein 2) (HMG-2)	6	15	1.56672	0.647751	1.44593	0.532001	0.692392	0.327486	0.0502833		0.651283	1	18.1818	null	Regulation of nucleobase, nucleoside, nucleotide and nucleic acid metabolism (GO:0019219)
P61019	RAB2A	Ras-related protein Rab-2A	13	30	1.56754	0.648503	1.44669	0.532753	0.693438	0.326756	0.0502125		0.650746	1	45.7547	null	Cell communication (GO:0007154); Signal transduction (GO:0007165)
Q96JE9	MAP6	Microtubule-associated protein 6 (MAP-6) (Stable tubule-only polypeptide) (STOP)	33	82	1.56808	0.648997	1.44718	0.533247	0.694124	0.326277	0.0501416		0.650711	1	39.3604	null	Cell growth and/or maintenance (GO:0008151)
E9PF17	VCAN	Versican core protein	22	42	1.56853	0.649411	1.4476	0.533661	0.6947	0.325876	0.0500708		0.650711	1	9.84943	P13611	Cell growth and/or maintenance (GO:0008151)
O15126	SCAMP1	Secretory carrier-associated membrane protein 1 (Secretory carrier membrane protein 1)	11	20	1.57204	0.65264	1.45084	0.53689	0.699192	0.322758	0.0498584		0.647349	1	30.4734	null	Transport (GO:0006810)
P08247	SYP	Synaptophysin (Major synaptic vesicle protein p38)	9	16	1.57211	0.652706	1.45091	0.536956	0.699283	0.322694	0.0497875		0.647349	1	8.94569	null	Transport (GO:0006810)
P22314	UBA1	Ubiquitin-like modifier-activating enzyme 1 (EC 6.2.1.45) (Protein A1S9) (Ubiquitin-activating enzyme E1)	20	40	1.57292	0.653446	1.45165	0.537696	0.700312	0.321983	0.0496459		0.647349	1	17.2023	null	Proteolysis and peptidolysis (GO:0006508)
Q9NR28	DIABLO	Diablo homolog, mitochondrial (Direct IAP-binding protein with low pI) (Second mitochondria-derived activator of caspase) (Smac)	6	7	1.57473	0.655104	1.45332	0.539354	0.702618	0.320392	0.0495751		0.646277	1	18.8285	null	Apoptosis (GO:0006915)
Q96GW7	BCAN	Brevican core protein (Brain-enriched hyaluronan-binding protein) (BEHAB) (Chondroitin sulfate proteoglycan 7)	15	34	1.58279	0.662473	1.46076	0.546723	0.712868	0.313384	0.0490085		0.639448	1	9.44018	null	Cell communication (GO:0007154); Signal transduction (GO:0007165)
A0A0U1RR32	HIST1H3D	Histone H2A	7	18	1.58293	0.662597	1.46089	0.546847	0.713041	0.313267	0.0489377		0.639448	1	28.4024	A0A0U1RRH7 P04908 P20671 Q7L7L0	Regulation of nucleobase, nucleoside, nucleotide and nucleic acid metabolism (GO:0019219)
P42785	PRCP	Lysosomal Pro-X carboxypeptidase (EC 3.4.16.2) (Angiotensinase C) (Lysosomal carboxypeptidase C) (Proline carboxypeptidase) (Prolylcarboxypeptidase) (PRCP)	4	5	1.58307	0.662721	1.46101	0.546971	0.713213	0.31315	0.0488669		0.639448	1	4.43548	null	Protein metabolism (GO:0019538)
P61266	STX1B	Syntaxin-1B (Syntaxin-1B1) (Syntaxin-1B2)	37	141	1.58562	0.665049	1.46337	0.549299	0.716451	0.310958	0.048796		0.63726	1	57.2917	null	Transport (GO:0006810)
P0C0S5	H2AFZ	Histone H2A.Z (H2A/z)	7	22	1.58825	0.667435	1.4658	0.551685	0.71977	0.308722	0.0485836		0.635445	1	31.25	Q71UI9	Regulation of nucleobase, nucleoside, nucleotide and nucleic acid metabolism (GO:0019219)
P05060	CHGB	Secretogranin-1 (Chromogranin-B) (CgB) (Secretogranin I) (SgI) [Cleaved into: PE-11; GAWK peptide; CCB peptide]	10	14	1.58833	0.667514	1.46588	0.551764	0.71988	0.308648	0.0485127		0.635445	1	16.839	null	Cell communication (GO:0007154); Signal transduction (GO:0007165)
Q5T1J5	CHCHD2P9	Putative coiled-coil-helix-coiled-coil-helix domain-containing protein CHCHD2P9, mitochondrial (Coiled-coil-helix-coiled-coil-helix domain-containing 2 pseudogene 9)	2	6	1.58921	0.668306	1.46668	0.552556	0.720981	0.307909	0.0483711		0.635445	1	18.543	Q9Y6H1	mitochondrion organization [GO:0007005]; positive regulation of transcription from RNA polymerase II promoter [GO:0045944]
O75781	PALM	Paralemmin-1 (Paralemmin)	17	35	1.59063	0.669603	1.468	0.553853	0.722784	0.3067	0.0479462		0.635445	1	29.7158	null	Biological_process unknown (GO:0000004)
Q9UHV9	PFDN2	Prefoldin subunit 2	10	16	1.59197	0.670817	1.46924	0.555067	0.724474	0.305571	0.0478754		0.635445	1	39.6104	null	Protein metabolism (GO:0019538)
P51659	HSD17B4	Peroxisomal multifunctional enzyme type 2 (MFE-2) (17-beta-hydroxysteroid dehydrogenase 4) (17-beta-HSD 4) (D-bifunctional protein) (DBP) (Multifunctional protein 2) (MPF-2) (Short chain dehydrogenase/reductase family 8C member 1) [Cleaved into: (3R)-hydr	7	9	1.59238	0.671189	1.46962	0.555439	0.724991	0.305226	0.0478045		0.635445	1	13.0435	null	Metabolism (GO:0008152); Energy pathways (GO:0006091)
O43157	PLXNB1	Plexin-B1 (Semaphorin receptor SEP)	4	6	1.59331	0.672026	1.47047	0.556276	0.726155	0.30445	0.0475921		0.635445	1	2.62295	null	Cell communication (GO:0007154); Signal transduction (GO:0007165)
Q01814	ATP2B2	Plasma membrane calcium-transporting ATPase 2 (PMCA2) (EC 3.6.3.8) (Plasma membrane calcium ATPase isoform 2) (Plasma membrane calcium pump isoform 2)	18	29	1.59358	0.67227	1.47072	0.55652	0.726494	0.304224	0.0475212		0.635445	1	13.757	null	Transport (GO:0006810)
Q13509	TUBB3	Tubulin beta-3 chain (Tubulin beta-4 chain) (Tubulin beta-III)	26	53	1.59796	0.676227	1.47476	0.560477	0.731998	0.300575	0.0471671		0.635445	1	40.4444	null	Cell growth and/or maintenance (GO:0008151)
P61925	PKIA	cAMP-dependent protein kinase inhibitor alpha (PKI-alpha) (cAMP-dependent protein kinase inhibitor, muscle/brain isoform)	3	6	1.59807	0.676328	1.47486	0.560578	0.732138	0.300482	0.0470963		0.635445	1	50	null	Signal transduction (GO:0007165); Cell communication (GO:0007154)
Q99497	PARK7	Protein DJ-1 (DJ-1) (Oncogene DJ1) (Parkinson disease protein 7) (Parkinsonism-associated deglycase) (Protein deglycase DJ-1) (EC 3.1.2.-) (EC 3.5.1.124)	33	86	1.59813	0.676386	1.47492	0.560636	0.732219	0.300429	0.0470255		0.635445	1	74.0741	null	Regulation of nucleobase, nucleoside, nucleotide and nucleic acid metabolism (GO:0019219)
P16104	H2AFX	Histone H2AX (H2a/x) (Histone H2A.X)	5	17	1.59931	0.677447	1.476	0.561697	0.733695	0.299456	0.0468839		0.635445	0.9997	21.6783	null	DNA repair (GO:0006281)
Q06323	PSME1	Proteasome activator complex subunit 1 (11S regulator complex subunit alpha) (REG-alpha) (Activator of multicatalytic protease subunit 1) (Interferon gamma up-regulated I-5111 protein) (IGUP I-5111) (Proteasome activator 28 subunit alpha) (PA28a) (PA28alp	3	5	1.59943	0.67756	1.47612	0.561811	0.733853	0.299352	0.046813		0.635445	1	6.0241	null	Protein metabolism (GO:0019538)
B7Z264	DLG2	Disks large homolog 2 (cDNA FLJ53314, highly similar to Discs large homolog 2)	6	10	1.60094	0.678921	1.47751	0.563171	0.735745	0.298108	0.0466714		0.635445	1	12.7686	B7Z2T4	Cell communication (GO:0007154); Signal transduction (GO:0007165)
Q7Z4V5	HDGFL2	Hepatoma-derived growth factor-related protein 2 (HRP-2) (Hepatoma-derived growth factor 2) (HDGF-2)	7	12	1.60315	0.680906	1.47955	0.565156	0.738505	0.296299	0.0466006		0.635445	1	8.04769	null	Cell growth and/or maintenance (GO:0008151)
K7ERG4	SNRPD2	Small nuclear ribonucleoprotein Sm D2	2	3	1.60364	0.681349	1.48	0.565599	0.739122	0.295895	0.0464589		0.635445	1	37.1795	P62316	Regulation of nucleobase, nucleoside, nucleotide and nucleic acid metabolism (GO:0019219)
P61978	HNRNPK	Heterogeneous nuclear ribonucleoprotein K (hnRNP K) (Transformation up-regulated nuclear protein) (TUNP)	14	26	1.6065	0.683922	1.48264	0.568172	0.742701	0.293563	0.0463173		0.633809	1	30.8855	null	Regulation of nucleobase, nucleoside, nucleotide and nucleic acid metabolism (GO:0019219)
F8WJN3	CPSF6	Cleavage and polyadenylation-specificity factor subunit 6	4	8	1.60698	0.684352	1.48309	0.568603	0.743299	0.293174	0.0462465		0.633809	1	5.02092	Q16630	Regulation of nucleobase, nucleoside, nucleotide and nucleic acid metabolism (GO:0019219)
P68371	TUBB4B	Tubulin beta-4B chain (Tubulin beta-2 chain) (Tubulin beta-2C chain)	34	74	1.60841	0.685638	1.48441	0.569888	0.745087	0.292015	0.0461048		0.632885	1	53.7079	null	Cell growth and/or maintenance (GO:0008151)
O15145	ARPC3	Actin-related protein 2/3 complex subunit 3 (Arp2/3 complex 21 kDa subunit) (p21-ARC)	3	7	1.60997	0.687038	1.48585	0.571288	0.747034	0.290756	0.0458215		0.632885	1	10.1124	null	Cell growth and/or maintenance (GO:0008151)
P09104	ENO2	Gamma-enolase (EC 4.2.1.11) (2-phospho-D-glycerate hydro-lyase) (Enolase 2) (Neural enolase) (Neuron-specific enolase) (NSE)	60	226	1.61108	0.688031	1.48687	0.572281	0.748416	0.289864	0.0456799		0.632885	1	73.9631	null	Metabolism (GO:0008152); Energy pathways (GO:0006091)
P02649	APOE	Apolipoprotein E (Apo-E)	28	60	1.61379	0.690449	1.48937	0.574699	0.751779	0.287702	0.0456091		0.630801	1	52.6814	null	Transport (GO:0006810)
P23381	WARS	Tryptophan--tRNA ligase, cytoplasmic (EC 6.1.1.2) (Interferon-induced protein 53) (IFP53) (Tryptophanyl-tRNA synthetase) (TrpRS) (hWRS) [Cleaved into: T1-TrpRS; T2-TrpRS]	2	2	1.61644	0.692821	1.49182	0.577071	0.755078	0.285592	0.0455382		0.627148	1	3.39703	null	Protein metabolism (GO:0019538)
O43236	SEPT4	Septin-4 (Apoptosis-related protein in the TGF-beta signaling pathway) (ARTS) (Bradeion beta) (Brain protein H5) (CE5B3 beta) (Cell division control-related protein 2) (hCDCREL-2) (Cerebral protein 7) (Peanut-like protein 2)	17	29	1.62543	0.700821	1.50011	0.585071	0.766204	0.278553	0.0450425		0.617522	1	24.2678	null	Apoptosis (GO:0006915)
P68402	PAFAH1B2	Platelet-activating factor acetylhydrolase IB subunit beta (EC 3.1.1.47) (PAF acetylhydrolase 30 kDa subunit) (PAF-AH 30 kDa subunit) (PAF-AH subunit beta) (PAFAH subunit beta)	6	16	1.62551	0.700894	1.50019	0.585144	0.766307	0.278489	0.0449717		0.617522	1	20.9607	null	Cell communication (GO:0007154); Signal transduction (GO:0007165)
O43181	NDUFS4	NADH dehydrogenase [ubiquinone] iron-sulfur protein 4, mitochondrial (Complex I-18 kDa) (CI-18 kDa) (Complex I-AQDQ) (CI-AQDQ) (NADH-ubiquinone oxidoreductase 18 kDa subunit)	8	19	1.62568	0.701047	1.50035	0.585297	0.766519	0.278356	0.0449008		0.617522	1	20	null	Metabolism (GO:0008152); Energy pathways (GO:0006091)
Q9NP72	RAB18	Ras-related protein Rab-18	2	4	1.62905	0.704029	1.50345	0.588279	0.770667	0.275763	0.04483		0.615129	1	5.33981	null	Cell communication (GO:0007154); Signal transduction (GO:0007165)
P08758	ANXA5	Annexin A5 (Anchorin CII) (Annexin V) (Annexin-5) (Calphobindin I) (CBP-I) (Endonexin II) (Lipocortin V) (Placental anticoagulant protein 4) (PP4) (Placental anticoagulant protein I) (PAP-I) (Thromboplastin inhibitor) (Vascular anticoagulant-alpha) (VAC-a	20	49	1.62938	0.704321	1.50376	0.588572	0.771074	0.27551	0.0446884		0.615129	1	36.25	null	Cell communication (GO:0007154); Signal transduction (GO:0007165)
B4DKF8	PSD3	PH and SEC7 domain-containing protein 3 (Pleckstrin and Sec7 domain containing 3, isoform CRA_a) (cDNA FLJ54694, highly similar to Pleckstrin and Sec7 domain-containing protein3)	22	56	1.63102	0.705779	1.50528	0.590029	0.7731	0.27425	0.0445467		0.615129	1	46.0106	null	Cell communication (GO:0007154); Signal transduction (GO:0007165)
F8VXJ7	CNPY2	Protein canopy homolog 2 (Fragment)	3	4	1.63315	0.707657	1.50724	0.591907	0.775712	0.272632	0.0444759		0.612987	1	14.2857	F8W031 Q9Y2B0	Cell growth and/or maintenance (GO:0008151)
E7EMW7	UBR5	E3 ubiquitin-protein ligase UBR5	2	4	1.63373	0.708171	1.50778	0.592421	0.776428	0.272189	0.0444051		0.612968	1	0.465616	E7ET84 O95071	Protein metabolism (GO:0019538)
P07196	NEFL	Neurofilament light polypeptide (NF-L) (68 kDa neurofilament protein) (Neurofilament triplet L protein)	41	81	1.63522	0.709486	1.50915	0.593736	0.778256	0.271062	0.0443343		0.611405	1	40.884	null	Cell growth and/or maintenance (GO:0008151)
O14994	SYN3	Synapsin-3 (Synapsin III)	9	14	1.64103	0.714603	1.51451	0.598853	0.785374	0.266704	0.0439093		0.606736	1	20.3448	null	Neurotransmitter transport (GO:0006836)
F8W6I7	HNRNPA1	Heterogeneous nuclear ribonucleoprotein A1	8	19	1.6434	0.716682	1.5167	0.600932	0.788265	0.264947	0.0437677		0.605348	1	22.8013	P09651	Regulation of nucleobase, nucleoside, nucleotide and nucleic acid metabolism (GO:0019219)
C9JJT5	ATP5J2-PTCD1	ATP5J2-PTCD1 readthrough	2	3	1.64556	0.718574	1.51869	0.602824	0.790897	0.263355	0.0436261		0.603664	1	20.3704	C9JU26 G3V325 P56134
P06756	ITGAV	Integrin alpha-V (Vitronectin receptor) (Vitronectin receptor subunit alpha) (CD antigen CD51) [Cleaved into: Integrin alpha-V heavy chain; Integrin alpha-V light chain]	2	2	1.64732	0.720125	1.52032	0.604375	0.793054	0.262055	0.0435552		0.601662	0.9996	1.81298	null	Cell communication (GO:0007154); Signal transduction (GO:0007165); Cell adhesion (GO:0007155)
P51610	HCFC1	Host cell factor 1 (HCF) (HCF-1) (C1 factor) (CFF) (VCAF) (VP16 accessory protein) [Cleaved into: HCF N-terminal chain 1; HCF N-terminal chain 2; HCF N-terminal chain 3; HCF N-terminal chain 4; HCF N-terminal chain 5; HCF N-terminal chain 6; HCF C-termina	6	12	1.64973	0.722228	1.52254	0.606478	0.795979	0.260299	0.0433428		0.60056	1	3.4398	null	Regulation of nucleobase, nucleoside, nucleotide and nucleic acid metabolism (GO:0019219)
P42166	TMPO	Lamina-associated polypeptide 2, isoform alpha (Thymopoietin isoform alpha) (TP alpha) (Thymopoietin-related peptide isoform alpha) (TPRP isoform alpha) [Cleaved into: Thymopoietin (TP) (Splenin); Thymopentin (TP5)]	18	35	1.64995	0.722421	1.52274	0.606671	0.796247	0.260139	0.043272		0.60056	1	20.4611	null	Nuclear organization and biogenesis (GO:0006997)
B1AKR6	DYNLRB1	Dynein light chain roadblock-type 1	4	14	1.65255	0.724696	1.52514	0.608946	0.799411	0.25825	0.0432011		0.597784	1	25	Q9NP97	Biological_process unknown (GO:0000004)
G5E972	TMPO	Lamina-associated polypeptide 2, isoforms beta/gamma (Thymopoietin, isoform CRA_d)	24	46	1.6588	0.730136	1.53091	0.614386	0.806978	0.25377	0.0427762		0.593252	1	42.9952	P42167	Nuclear organization and biogenesis (GO:0006997)
Q6P1N0	CC2D1A	Coiled-coil and C2 domain-containing protein 1A (Akt kinase-interacting protein 1) (Five prime repressor element under dual repression-binding protein 1) (FRE under dual repression-binding protein 1) (Freud-1) (Putative NF-kappa-B-activating protein 023N)	3	8	1.65894	0.730261	1.53104	0.614512	0.807153	0.253668	0.0427054		0.593252	1	3.04942	null	Cell communication (GO:0007154); Signal transduction (GO:0007165)
Q16799	RTN1	Reticulon-1 (Neuroendocrine-specific protein)	32	76	1.66027	0.731422	1.53227	0.615672	0.808766	0.25272	0.0426346		0.592758	1	40.7216	null	Cell communication (GO:0007154); Signal transduction (GO:0007165)
P13667	PDIA4	Protein disulfide-isomerase A4 (EC 5.3.4.1) (Endoplasmic reticulum resident protein 70) (ER protein 70) (ERp70) (Endoplasmic reticulum resident protein 72) (ER protein 72) (ERp-72) (ERp72)	7	9	1.66151	0.732491	1.53341	0.616741	0.810254	0.251848	0.0425637		0.591697	1	10.2326	null	Protein metabolism (GO:0019538)
Q96D05	C10orf35	Uncharacterized protein C10orf35	2	3	1.66288	0.733683	1.53467	0.617933	0.811912	0.250879	0.0424221		0.591389	0.9991	19.8347	null	Biological_process unknown (GO:0000004)
Q96E17	RAB3C	Ras-related protein Rab-3C	4	7	1.66329	0.734036	1.53505	0.618286	0.812403	0.250593	0.0423513		0.591389	1	9.2511	null	Transport (GO:0006810)
A0A1W2PPU6	SCARB2	Lysosome membrane protein 2	3	5	1.66779	0.737939	1.53921	0.622189	0.81783	0.247441	0.042068		0.588194	1	10.274	A0A1W2PPX5 A0A1W2PQB7 A0A1W2PQR6 A0A1W2PRS1 A0A1W2PS43 Q14108	Cell communication (GO:0007154); Signal transduction (GO:0007165)
H3BMU1	IST1	IST1 homolog (Fragment)	2	3	1.67101	0.740721	1.54218	0.624971	0.8217	0.245212	0.0418555		0.585853	0.9999	4.85437	H3BQF7 H3BUI0 J3KR23 P53990	protein transport [GO:0015031]
Q92522	H1FX	Histone H1x	4	8	1.67111	0.74081	1.54228	0.62506	0.821824	0.24514	0.0417847		0.585853	1	17.3709	null	Regulation of nucleobase, nucleoside, nucleotide and nucleic acid metabolism (GO:0019219)
P62857	RPS28	40S ribosomal protein S28 (Small ribosomal subunit protein eS28)	11	16	1.67211	0.741674	1.5432	0.625924	0.823026	0.244451	0.0416431		0.585853	1	60.8696	null	Protein metabolism (GO:0019538)
P35612	ADD2	Beta-adducin (Erythrocyte adducin subunit beta)	12	27	1.67324	0.742641	1.54423	0.626891	0.824371	0.24368	0.0414306		0.585853	1	13.3609	null	Cell growth and/or maintenance (GO:0008151)
P49407	ARRB1	Beta-arrestin-1 (Arrestin beta-1)	3	5	1.67337	0.742755	1.54436	0.627005	0.824529	0.24359	0.0413598		0.585853	1	7.41627	null	Cell communication (GO:0007154); Signal transduction (GO:0007165)
B7ZLU9	GRM4	Metabotropic glutamate receptor 4	2	3	1.67379	0.743115	1.54474	0.627365	0.82503	0.243304	0.0412181		0.585853	0.9999	1.84971	Q14833 V9GYR3	Cell communication (GO:0007154); Signal transduction (GO:0007165)
F8VVM2	SLC25A3	Phosphate carrier protein, mitochondrial	4	7	1.67422	0.743486	1.54514	0.627736	0.825546	0.243009	0.0411473		0.585853	1	7.71605	Q00325	Transport (GO:0006810)
F8WF69	CLTA	Clathrin light chain	7	19	1.67592	0.744953	1.54671	0.629203	0.827587	0.241847	0.0410765		0.585853	1	13.4615	P09496	Cell growth and/or maintenance (GO:0008151)
K7ELS0	C19orf43	Uncharacterized protein C19orf43	4	7	1.67955	0.748076	1.55006	0.632326	0.83193	0.239385	0.0407932		0.585853	1	30.303	K7EN60 K7ERU7 Q9BQ61	Biological_process unknown (GO:0000004)
Q9P0K1	ADAM22	Disintegrin and metalloproteinase domain-containing protein 22 (ADAM 22) (Metalloproteinase-disintegrin ADAM22-3) (Metalloproteinase-like, disintegrin-like, and cysteine-rich protein 2)	3	6	1.68406	0.751948	1.55423	0.636198	0.837315	0.236357	0.0406516		0.581421	1	2.64901	null	Protein metabolism (GO:0019538)
P49591	SARS	Serine--tRNA ligase, cytoplasmic (EC 6.1.1.11) (Seryl-tRNA synthetase) (SerRS) (Seryl-tRNA(Ser/Sec) synthetase)	4	7	1.68572	0.753368	1.55576	0.637618	0.839291	0.235253	0.0404391		0.581389	1	6.03113	Q5T5C7	Metabolism (GO:0008152); Energy pathways (GO:0006091)
P63215	GNG3	Guanine nucleotide-binding protein G(I)/G(S)/G(O) subunit gamma-3	7	11	1.68721	0.75464	1.55713	0.63889	0.84106	0.234267	0.0402975		0.581345	1	22.6667	null	Cell communication (GO:0007154); Signal transduction (GO:0007165)
A2RQR6	TCEAL4	Transcription elongation factor A (SII)-like 4 variant 1 (Transcription elongation factor A protein-like 4)	3	4	1.69031	0.757286	1.55999	0.641536	0.844739	0.232227	0.0402266		0.577297	0.9894	10.2151	Q96EI5	Biological_process unknown (GO:0000004)
Q9BPX5	ARPC5L	Actin-related protein 2/3 complex subunit 5-like protein (Arp2/3 complex 16 kDa subunit 2) (ARC16-2)	11	15	1.69361	0.760103	1.56304	0.644353	0.848658	0.230068	0.0401558		0.572939	1	63.3987	null	Biological_process unknown (GO:0000004)
Q9C0E8	LNP	Protein lunapark	2	3	1.69792	0.763768	1.56701	0.648018	0.853756	0.227281	0.0400142		0.568001	1	3.03738	null	Biological_process unknown (GO:0000004)
Q15102	PAFAH1B3	Platelet-activating factor acetylhydrolase IB subunit gamma (EC 3.1.1.47) (PAF acetylhydrolase 29 kDa subunit) (PAF-AH 29 kDa subunit) (PAF-AH subunit gamma) (PAFAH subunit gamma)	6	10	1.6981	0.763921	1.56718	0.648171	0.853969	0.227165	0.0399433		0.568001	1	14.7186	null	Metabolism (GO:0008152); Energy pathways (GO:0006091)
F2Z2Y8	TOLLIP	Toll-interacting protein	6	10	1.69865	0.764391	1.56769	0.648641	0.854622	0.22681	0.0398725		0.568001	1	27.6995	Q9H0E2	Cell communication (GO:0007154); Signal transduction (GO:0007165)
P30101	PDIA3	Protein disulfide-isomerase A3 (EC 5.3.4.1) (58 kDa glucose-regulated protein) (58 kDa microsomal protein) (p58) (Disulfide isomerase ER-60) (Endoplasmic reticulum resident protein 57) (ER protein 57) (ERp57) (Endoplasmic reticulum resident protein 60) (E	31	57	1.70132	0.766656	1.57015	0.650906	0.857773	0.225102	0.0397309		0.56614	1	38.2178	null	Protein metabolism (GO:0019538)
A0A087WW40	SH3GLB1	Endophilin-B1	2	2	1.70578	0.770432	1.57427	0.654682	0.863025	0.222275	0.0396601		0.560451	1	5.32995	Q9Y371	Metabolism (GO:0008152); Energy pathways (GO:0006091)
Q9Y3C6	PPIL1	Peptidyl-prolyl cis-trans isomerase-like 1 (PPIase) (EC 5.2.1.8) (Rotamase PPIL1)	3	5	1.71069	0.774582	1.5788	0.658832	0.868797	0.219198	0.0395892		0.553681	1	15.0602	null	Metabolism (GO:0008152); Energy pathways (GO:0006091)
Q9Y3I0	RTCB	tRNA-splicing ligase RtcB homolog (EC 6.5.1.3)	7	10	1.71588	0.778946	1.58359	0.663196	0.874866	0.215995	0.0393768		0.548535	1	16.0396	null	Biological_process unknown (GO:0000004)
F8WCA0	VAMP2	Vesicle-associated membrane protein 2	11	37	1.71671	0.77965	1.58436	0.6639	0.875846	0.215482	0.0393059		0.548217	1	44.9153	J3QRU4 L7N2F9 P63027	Transport (GO:0006810)
Q92945	KHSRP	Far upstream element-binding protein 2 (FUSE-binding protein 2) (KH type-splicing regulatory protein) (KSRP) (p75)	46	94	1.71996	0.782376	1.58736	0.666626	0.879637	0.213502	0.0390935		0.546131	1	47.1167	null	Regulation of nucleobase, nucleoside, nucleotide and nucleic acid metabolism (GO:0019219)
A0A0A0MRV0	RRBP1	Ribosome-binding protein 1	7	10	1.7202	0.782577	1.58758	0.666827	0.879917	0.213356	0.0390227		0.546131	1	5.10638	Q9P2E9	Transport (GO:0006810)
A0A024R571	EHD1	EH domain-containing protein 1 (EH-domain containing 1, isoform CRA_a)	3	6	1.72132	0.783513	1.58861	0.667763	0.881218	0.21268	0.0389518		0.546008	1	6.56934	Q9H4M9	Cell communication (GO:0007154); Signal transduction (GO:0007165)
H3BPK2	MT3	Metallothionein-3	4	6	1.72191	0.784009	1.58915	0.668259	0.881908	0.212322	0.0388102		0.546008	1	36.2832	null	Cell communication (GO:0007154); Signal transduction (GO:0007165)
Q13825	AUH	Methylglutaconyl-CoA hydratase, mitochondrial (EC 4.2.1.18) (AU-specific RNA-binding enoyl-CoA hydratase) (AU-binding protein/enoyl-CoA hydratase)	8	11	1.72312	0.785019	1.59027	0.669269	0.883313	0.211594	0.0386686		0.546008	1	25.6637	null	Regulation of nucleobase, nucleoside, nucleotide and nucleic acid metabolism (GO:0019219)
Q969P0	IGSF8	Immunoglobulin superfamily member 8 (IgSF8) (CD81 partner 3) (Glu-Trp-Ile EWI motif-containing protein 2) (EWI-2) (Keratinocytes-associated transmembrane protein 4) (KCT-4) (LIR-D1) (Prostaglandin regulatory-like protein) (PGRL) (CD antigen CD316)	32	72	1.72316	0.785054	1.59031	0.669304	0.883362	0.211569	0.0385977		0.546008	1	45.3507	null	Immune response (GO:0006955)
F8VNV8	CACNB3	Voltage-dependent L-type calcium channel subunit beta-3	2	4	1.72496	0.786566	1.59197	0.670816	0.885465	0.210484	0.0384561		0.546008	1	2.62582	F8VUW8 P54284	Transport (GO:0006810)
Q6IPX3	TCEAL6	Transcription elongation factor A protein-like 6 (TCEA-like protein 6) (Transcription elongation factor S-II protein-like 6)	25	61	1.72898	0.789918	1.59568	0.674168	0.890127	0.208092	0.0383144		0.543117	1	51.5	null	Biological_process unknown (GO:0000004)
Q9H9H5	MAP6D1	MAP6 domain-containing protein 1 (21 kDa STOP-like protein) (SL21)	10	20	1.73657	0.796244	1.60269	0.680494	0.898925	0.203632	0.0376771		0.539893	1	47.2362	null	Microtubule-based process (GO:0007017)
Q15435	PPP1R7	Protein phosphatase 1 regulatory subunit 7 (Protein phosphatase 1 regulatory subunit 22)	5	8	1.74297	0.801551	1.60859	0.685801	0.906306	0.199944	0.0372521		0.5366	1	9.44444	null	Regulation of nucleobase, nucleoside, nucleotide and nucleic acid metabolism (GO:0019219)
Q9H098	FAM107B	Protein FAM107B	5	8	1.74301	0.801584	1.60863	0.685834	0.906352	0.199921	0.0371813		0.5366	1	29.771	null	Biological_process unknown (GO:0000004)
P30043	BLVRB	Flavin reductase (NADPH) (FR) (EC 1.5.1.30) (Biliverdin reductase B) (BVR-B) (EC 1.3.1.24) (Biliverdin-IX beta-reductase) (Green heme-binding protein) (GHBP) (NADPH-dependent diaphorase) (NADPH-flavin reductase) (FLR)	4	6	1.74375	0.802194	1.60931	0.686444	0.9072	0.199501	0.0371105		0.5366	1	18.932	null	Metabolism (GO:0008152); Energy pathways (GO:0006091)
O15511	ARPC5	Actin-related protein 2/3 complex subunit 5 (Arp2/3 complex 16 kDa subunit) (p16-ARC)	3	5	1.74548	0.803624	1.61091	0.687874	0.909189	0.198517	0.0369688		0.5366	1	13.245	null	Cell growth and/or maintenance (GO:0008151)
P40121	CAPG	Macrophage-capping protein (Actin regulatory protein CAP-G)	3	6	1.74607	0.80411	1.61145	0.68836	0.909865	0.198184	0.036898		0.5366	1	7.18391	null	Cell growth and/or maintenance (GO:0008151)
P00167	CYB5A	Cytochrome b5 (Microsomal cytochrome b5 type A) (MCB5)	5	14	1.74615	0.804181	1.61153	0.688431	0.909964	0.198135	0.0368272		0.5366	1	35.8209	null	Metabolism (GO:0008152); Energy pathways (GO:0006091)
E9PEZ7	ABI2	Abl interactor 2	2	3	1.74864	0.806233	1.61382	0.690483	0.912818	0.196732	0.0366856		0.536196	1	3.71179	null	Cell communication (GO:0007154); Signal transduction (GO:0007165); Regulation of cell proliferation (GO:0042127)
Q8NFZ8	CADM4	Cell adhesion molecule 4 (Immunoglobulin superfamily member 4C) (IgSF4C) (Nectin-like protein 4) (NECL-4) (TSLC1-like protein 2)	19	34	1.75685	0.812991	1.6214	0.697241	0.922218	0.192161	0.0363314		0.528296	1	39.1753	null	Immune response (GO:0006955)
Q8TC26	TMEM163	Transmembrane protein 163	10	17	1.75736	0.81341	1.62187	0.69766	0.9228	0.191881	0.0362606		0.528296	1	23.5294	null	Biological_process unknown (GO:0000004)
Q14157	UBAP2L	Ubiquitin-associated protein 2-like (Protein NICE-4)	5	8	1.76003	0.815598	1.62433	0.699848	0.925844	0.190419	0.036119		0.526462	1	4.59982	null	Biological_process unknown (GO:0000004)
G3V2S6	ATP6V1D	V-type proton ATPase subunit D	6	9	1.76087	0.816288	1.62511	0.700538	0.926803	0.18996	0.0359773		0.526462	1	42.7083	H0YJH8 Q9Y5K8	Metabolism (GO:0008152); Energy pathways (GO:0006091)
Q5H9L2	TCEAL5	Transcription elongation factor A protein-like 5 (TCEA-like protein 5) (Transcription elongation factor S-II protein-like 5)	25	55	1.76113	0.816498	1.62535	0.700748	0.927095	0.189821	0.0359065		0.526462	1	46.6019	null	Regulation of nucleobase, nucleoside, nucleotide and nucleic acid metabolism (GO:0019219)
P48539	PCP4	Purkinje cell protein 4 (Brain-specific antigen PCP-4) (Brain-specific polypeptide PEP-19)	13	28	1.76306	0.818085	1.62714	0.702335	0.929303	0.188768	0.0356232		0.526462	1	77.4194	null	Cell communication (GO:0007154); Signal transduction (GO:0007165)
Q969E4	TCEAL3	Transcription elongation factor A protein-like 3 (TCEA-like protein 3) (Transcription elongation factor S-II protein-like 3)	24	60	1.76526	0.819881	1.62916	0.704131	0.931801	0.187582	0.0354816		0.526462	1	41.5	null	Biological_process unknown (GO:0000004)
Q9UM19	HPCAL4	Hippocalcin-like protein 4 (HLP4)	4	6	1.77011	0.823835	1.63363	0.708085	0.937301	0.184991	0.0354108		0.522415	1	19.3717	null	Cell communication (GO:0007154); Signal transduction (GO:0007165)
O14949	UQCRQ	Cytochrome b-c1 complex subunit 8 (Complex III subunit 8) (Complex III subunit VIII) (Ubiquinol-cytochrome c reductase complex 9.5 kDa protein) (Ubiquinol-cytochrome c reductase complex ubiquinone-binding protein QP-C)	5	8	1.77381	0.826852	1.63705	0.711102	0.941497	0.183032	0.0352691		0.518958	1	37.8049	null	Biological_process unknown (GO:0000004)
B4DIZ1	ERMN	Ermin (cDNA FLJ54268)	9	17	1.77511	0.827909	1.63825	0.712159	0.942966	0.18235	0.0351983		0.518064	1	14.7727	Q8TAM6	Cytoskeleton organization and biogenesis (GO:0007010)
A0A0G2JJZ9	DDX39B	Spliceosome RNA helicase DDX39B (Fragment)	5	7	1.77739	0.829763	1.64036	0.714013	0.945546	0.181156	0.0349858		0.517424	1	5.4878	A0A140T9X3 O00148 Q13838 Q5STU3	Regulation of nucleobase, nucleoside, nucleotide and nucleic acid metabolism (GO:0019219)
P63220	RPS21	40S ribosomal protein S21 (Small ribosomal subunit protein eS21)	6	9	1.77786	0.830141	1.64079	0.714391	0.946072	0.180914	0.034915		0.517424	1	34.9398	Q8WVC2	Protein metabolism (GO:0019538)
Q9UNZ2	NSFL1C	NSFL1 cofactor p47 (UBX domain-containing protein 2C) (p97 cofactor p47)	16	29	1.78013	0.831983	1.64289	0.716233	0.948634	0.179735	0.0347734		0.516877	1	41.6216	null	Cell growth and/or maintenance (GO:0008151)
A0A140T951	HLA-B	HLA class I histocompatibility antigen, B-46 alpha chain (Fragment)	2	2	1.78055	0.832324	1.64328	0.716574	0.949108	0.179518	0.0347025		0.516877	1	8.29875	A0A140T9A9 A0A140T9G0 A0A140T9H3 A0A140T9S9 A0A1W2PPR8 P01889 P03989 P10319 P18463 P18464 P18465 P30460 P30461 P30462 P30464 P30466 P30475 P30479 P30480 P30481 P30483 P30484 P30485 P30486 P30487 P30488 P30490 P30491 P30492 P30493 P30495 P30498 P30685 Q04826 Q29718 Q29836 Q29940 Q31610 Q95365	Immune response (GO:0006955)
C9J896	CREB1	Cyclic AMP-responsive element-binding protein 1 (Fragment)	4	7	1.78081	0.832534	1.64351	0.716784	0.949399	0.179384	0.0345609		0.516877	1	11.5538	C9JBT4 H7C1R5 P16220	Regulation of nucleobase, nucleoside, nucleotide and nucleic acid metabolism (GO:0019219)
P27338	MAOB	Amine oxidase [flavin-containing] B (EC 1.4.3.4) (Monoamine oxidase type B) (MAO-B)	7	11	1.78169	0.833243	1.64432	0.717493	0.950385	0.178933	0.0344901		0.516877	1	9.42308	null	Metabolism (GO:0008152); Energy pathways (GO:0006091)
Q96AQ6	PBXIP1	Pre-B-cell leukemia transcription factor-interacting protein 1 (Hematopoietic PBX-interacting protein)	3	3	1.78217	0.833633	1.64477	0.717883	0.950927	0.178685	0.0344193		0.516877	1	3.96717	null	Regulation of nucleobase, nucleoside, nucleotide and nucleic acid metabolism (GO:0019219)
Q13875	MOBP	Myelin-associated oligodendrocyte basic protein	2	3	1.78647	0.837112	1.64874	0.721362	0.955767	0.176485	0.0342776		0.514869	1	6.01093	null	Cell growth and/or maintenance (GO:0008151)
P35611	ADD1	Alpha-adducin (Erythrocyte adducin subunit alpha)	21	38	1.78904	0.839187	1.65111	0.723437	0.958653	0.175182	0.0342068		0.512126	1	23.7449	null	Cell growth and/or maintenance (GO:0008151)
P26038	MSN	Moesin (Membrane-organizing extension spike protein)	26	45	1.79202	0.841587	1.65386	0.725837	0.961991	0.173684	0.0339943		0.510921	1	24.2634	null	Cell growth and/or maintenance (GO:0008151)
E9PDL2	DPP6	Dipeptidyl aminopeptidase-like protein 6	3	5	1.79242	0.84191	1.65423	0.72616	0.962441	0.173483	0.0339235		0.510921	1	4.22164	E9PF59 P42658	Transport (GO:0006810)
Q9BSJ8	ESYT1	Extended synaptotagmin-1 (E-Syt1) (Membrane-bound C2 domain-containing protein)	3	3	1.79417	0.843316	1.65584	0.727566	0.964396	0.172611	0.033711		0.510921	1	2.71739	null	Cell communication (GO:0007154); Signal transduction (GO:0007165)
J3QRP2	CMTM4	CKLF-like MARVEL transmembrane domain-containing protein 4 (Fragment)	2	4	1.79436	0.843469	1.65602	0.727719	0.964609	0.172516	0.0336402		0.510921	1	6.42857	Q8IZR5	Biological_process unknown (GO:0000004)
Q9NQH7	XPNPEP3	Probable Xaa-Pro aminopeptidase 3 (X-Pro aminopeptidase 3) (EC 3.4.11.9) (Aminopeptidase P3) (APP3)	2	4	1.80169	0.849355	1.66279	0.733605	0.972795	0.168902	0.0334278		0.505276	0.9998	1.38067	null	Biological_process unknown (GO:0000004)
E9PL57	NEDD8-MDP1	NEDD8-MDP1 readthrough (Fragment)	6	13	1.80426	0.851409	1.66516	0.735659	0.975652	0.167654	0.0332861		0.503676	1	26.4706	null
P52907	CAPZA1	F-actin-capping protein subunit alpha-1 (CapZ alpha-1)	8	18	1.80673	0.853379	1.66743	0.737629	0.978393	0.166464	0.0332153		0.501166	1	27.972	null	Cell growth and/or maintenance (GO:0008151)
O15540	FABP7	Fatty acid-binding protein, brain (Brain lipid-binding protein) (BLBP) (Brain-type fatty acid-binding protein) (B-FABP) (Fatty acid-binding protein 7) (Mammary-derived growth inhibitor related)	10	33	1.8074	0.853914	1.66805	0.738164	0.979136	0.166142	0.0330737		0.501166	1	62.1212	null	Transport (GO:0006810)
Q9H2X9	SLC12A5	Solute carrier family 12 member 5 (Electroneutral potassium-chloride cotransporter 2) (K-Cl cotransporter 2) (hKCC2) (Neuronal K-Cl cotransporter)	4	7	1.82127	0.864947	1.68086	0.749198	0.994482	0.159602	0.0322946		0.493343	1	2.72169	null	Transport (GO:0006810)
Q13409	DYNC1I2	Cytoplasmic dynein 1 intermediate chain 2 (Cytoplasmic dynein intermediate chain 2) (Dynein intermediate chain 2, cytosolic) (DH IC-2)	6	12	1.82373	0.866889	1.68312	0.751139	0.997182	0.158472	0.032153		0.492704	1	9.09091	null	Cell growth and/or maintenance (GO:0008151)
Q14195	DPYSL3	Dihydropyrimidinase-related protein 3 (DRP-3) (Collapsin response mediator protein 4) (CRMP-4) (Unc-33-like phosphoprotein 1) (ULIP-1)	32	61	1.82544	0.868244	1.6847	0.752495	0.999068	0.157687	0.0320113		0.491849	1	40	null	Metabolism (GO:0008152); Energy pathways (GO:0006091)
C9JTE0	MOG	Myelin-oligodendrocyte glycoprotein	8	15	1.82566	0.868417	1.68491	0.752668	0.999308	0.157587	0.0319405		0.491849	1	23.9234	Q16653	Immune response (GO:0006955)
P26885	FKBP2	Peptidyl-prolyl cis-trans isomerase FKBP2 (PPIase FKBP2) (EC 5.2.1.8) (13 kDa FK506-binding protein) (13 kDa FKBP) (FKBP-13) (FK506-binding protein 2) (FKBP-2) (Immunophilin FKBP13) (Rotamase)	3	4	1.82626	0.868891	1.68546	0.753141	0.999968	0.157313	0.0317989		0.491849	1	9.15493	null	Cell communication (GO:0007154); Signal transduction (GO:0007165)
P23435	CBLN1	Cerebellin-1 (Precerebellin) [Cleaved into: Cerebellin (CER); [des-Ser1]-cerebellin]	4	7	1.8269	0.869396	1.68605	0.753646	1.00067	0.157021	0.031728		0.491849	1	7.25389	null	Cell communication (GO:0007154); Signal transduction (GO:0007165)
A0A0C4DG17	RPSA	40S ribosomal protein SA (37 kDa laminin receptor precursor) (37LRP) (37/67 kDa laminin receptor) (LRP/LR) (67 kDa laminin receptor) (67LR) (Laminin receptor 1) (LamR) (Laminin-binding protein precursor p40) (LBP/p40)	4	7	1.82878	0.870878	1.68778	0.755128	1.00273	0.156169	0.0316572		0.491849	1	10	C9J9K3 F8WD59 P08865	Cell communication (GO:0007154); Signal transduction (GO:0007165); Cell adhesion (GO:0007155)
Q6UW01	CBLN3	Cerebellin-3	5	9	1.83213	0.87352	1.69088	0.75777	1.00641	0.154657	0.0315864		0.489633	1	21.9512	null	Biological_process unknown (GO:0000004)
Q9UBI6	GNG12	Guanine nucleotide-binding protein G(I)/G(S)/G(O) subunit gamma-12	2	5	1.83366	0.874728	1.69229	0.758978	1.00809	0.15397	0.0313739		0.489633	1	15.2778	null	Cell communication (GO:0007154); Signal transduction (GO:0007165)
H3BRC0	COQ9	Ubiquinone biosynthesis protein COQ9, mitochondrial	4	7	1.8346	0.875466	1.69316	0.759716	1.00911	0.153551	0.0311615		0.489633	1	19.8068	H3BSJ5 O75208	Biological_process unknown (GO:0000004)
P36405	ARL3	ADP-ribosylation factor-like protein 3	4	7	1.83465	0.875508	1.69321	0.759758	1.00917	0.153528	0.0310907		0.489633	1	29.1209	null	Cell communication (GO:0007154); Signal transduction (GO:0007165)
C9JLW8	MCRIP1	Mapk-regulated corepressor-interacting protein 1 (Granulin-2) (Protein FAM195B)	3	5	1.83571	0.876341	1.69418	0.760591	1.01033	0.153056	0.0310198		0.489633	1	29.8969	I3L2L5 I3L317 I3L4Q0	Biological_process unknown (GO:0000004)
O75489	NDUFS3	NADH dehydrogenase [ubiquinone] iron-sulfur protein 3, mitochondrial (EC 1.6.5.3) (EC 1.6.99.3) (Complex I-30kD) (CI-30kD) (NADH-ubiquinone oxidoreductase 30 kDa subunit)	6	12	1.83679	0.877185	1.69518	0.761435	1.0115	0.152579	0.0308074		0.489633	1	15.9091	null	Metabolism (GO:0008152); Energy pathways (GO:0006091)
B2R5W2	HNRNPC	Heterogeneous nuclear ribonucleoproteins C1/C2 (cDNA, FLJ92657, highly similar to Homo sapiens heterogeneous nuclear ribonucleoprotein C (C1/C2) (HNRPC), transcript variant 2, mRNA)	4	7	1.83716	0.877478	1.69552	0.761728	1.01191	0.152414	0.0307365		0.489633	1	13.7931	B4DY08 G3V4W0 P07910	Regulation of nucleobase, nucleoside, nucleotide and nucleic acid metabolism (GO:0019219)
P12277	CKB	Creatine kinase B-type (EC 2.7.3.2) (B-CK) (Creatine kinase B chain)	49	221	1.83865	0.87865	1.6969	0.7629	1.01354	0.151754	0.0305949		0.489633	1	57.2178	null	Metabolism (GO:0008152); Energy pathways (GO:0006091)
A0A096LP69	CD99	CD99 antigen	2	5	1.84114	0.880598	1.69919	0.764848	1.01625	0.150663	0.0305241		0.489633	1	5.43478	P14209	Immune response (GO:0006955)
Q9Y5S9	RBM8A	RNA-binding protein 8A (Binder of OVCA1-1) (BOV-1) (RNA-binding motif protein 8A) (RNA-binding protein Y14) (Ribonucleoprotein RBM8A)	2	3	1.85047	0.887895	1.70781	0.772145	1.0264	0.146628	0.0303824		0.482607	1	5.17241	null	Regulation of nucleobase, nucleoside, nucleotide and nucleic acid metabolism (GO:0019219)
A0A0A0MRJ6	PCMT1	Protein-L-isoaspartate O-methyltransferase (EC 2.1.1.77)	20	54	1.85512	0.891509	1.71209	0.775759	1.03143	0.14466	0.0302408		0.478359	1	45.9649	F6S8N6 H7BY58 P22061	Protein metabolism (GO:0019538)
C9JIF9	APEH	Acylamino-acid-releasing enzyme	2	3	1.86032	0.895553	1.7169	0.779803	1.03705	0.142482	0.03017		0.472264	1	1.76391	C9JLK2 H7C1U0 H7C393 P13798	Metabolism (GO:0008152); Energy pathways (GO:0006091)
Q969E2	SCAMP4	Secretory carrier-associated membrane protein 4 (Secretory carrier membrane protein 4)	2	4	1.86079	0.895918	1.71733	0.780168	1.03756	0.142287	0.0300283		0.472264	1	4.80349	null	Transport (GO:0006810)
Q96AE4	FUBP1	Far upstream element-binding protein 1 (FBP) (FUSE-binding protein 1) (DNA helicase V) (hDH V)	28	43	1.86899	0.902262	1.7249	0.786513	1.04638	0.138925	0.029745		0.467051	1	34.9379	null	Regulation of nucleobase, nucleoside, nucleotide and nucleic acid metabolism (GO:0019219)
O14773	TPP1	Tripeptidyl-peptidase 1 (TPP-1) (EC 3.4.14.9) (Cell growth-inhibiting gene 1 protein) (Lysosomal pepstatin-insensitive protease) (LPIC) (Tripeptidyl aminopeptidase) (Tripeptidyl-peptidase I) (TPP-I)	4	6	1.87604	0.907689	1.7314	0.791939	1.05393	0.136098	0.0295326		0.460839	1	4.97336	null	Protein metabolism (GO:0019538)
P20020	ATP2B1	Plasma membrane calcium-transporting ATPase 1 (PMCA1) (EC 3.6.3.8) (Plasma membrane calcium ATPase isoform 1) (Plasma membrane calcium pump isoform 1)	10	19	1.88416	0.913924	1.7389	0.798174	1.0626	0.132905	0.0293201		0.452568	1	6.99523	null	Transport (GO:0006810)
F5H065	NRIP2	Nuclear receptor-interacting protein 2 (Fragment)	3	4	1.88443	0.91413	1.73915	0.79838	1.06289	0.1328	0.0292493		0.452568	1	26.8116	F5H2G5 Q9BQI9	Biological_process unknown (GO:0000004)
Q16352	INA	Alpha-internexin (Alpha-Inx) (66 kDa neurofilament protein) (NF-66) (Neurofilament-66) (Neurofilament 5)	46	83	1.8873	0.916325	1.7418	0.800575	1.06594	0.13169	0.0291076		0.452369	1	47.0942	null	Cell growth and/or maintenance (GO:0008151)
H0Y474	ATP6V1G2	V-type proton ATPase subunit G (Fragment)	19	38	1.88886	0.917518	1.74324	0.801768	1.0676	0.131091	0.0288244		0.452369	1	48.7342	O95670	Transport (GO:0006810)
P46108	CRK	Adapter molecule crk (Proto-oncogene c-Crk) (p38)	6	10	1.89122	0.919314	1.74541	0.803564	1.0701	0.130192	0.0287535		0.452369	1	25	null	Cell communication (GO:0007154); Signal transduction (GO:0007165)
A0A1W2PPS1	HNRNPU	Heterogeneous nuclear ribonucleoprotein U	4	8	1.89206	0.91996	1.74619	0.80421	1.071	0.129869	0.0286827		0.452369	1	7.83582	Q00839	Regulation of nucleobase, nucleoside, nucleotide and nucleic acid metabolism (GO:0019219)
P62942	FKBP1A	Peptidyl-prolyl cis-trans isomerase FKBP1A (PPIase FKBP1A) (EC 5.2.1.8) (12 kDa FK506-binding protein) (12 kDa FKBP) (FKBP-12) (Calstabin-1) (FK506-binding protein 1A) (FKBP-1A) (Immunophilin FKBP12) (Rotamase)	6	20	1.89358	0.921118	1.74759	0.805368	1.07261	0.129293	0.0285411		0.452369	1	29.6296	null	Cell communication (GO:0007154); Signal transduction (GO:0007165)
H0YK49	ETFA	Electron transfer flavoprotein subunit alpha, mitochondrial	3	4	1.89844	0.924817	1.75208	0.809067	1.07775	0.127466	0.0279745		0.452369	1	11.7904	H0YL12 H0YNX6 P13804	Metabolism (GO:0008152); Energy pathways (GO:0006091)
P61020	RAB5B	Ras-related protein Rab-5B	11	27	1.90571	0.930332	1.75879	0.814582	1.08542	0.124779	0.027762		0.449459	1	40	null	Cell communication (GO:0007154); Signal transduction (GO:0007165)
Q63HM9	PLCXD3	PI-PLC X domain-containing protein 3	2	4	1.90622	0.930712	1.75925	0.814962	1.08595	0.124595	0.0276912		0.449459	1	3.11526	null	Metabolism (GO:0008152); Energy pathways (GO:0006091)
P21281	ATP6V1B2	V-type proton ATPase subunit B, brain isoform (V-ATPase subunit B 2) (Endomembrane proton pump 58 kDa subunit) (HO57) (Vacuolar proton pump subunit B 2)	27	64	1.91479	0.937187	1.76716	0.821437	1.09496	0.121501	0.0273371		0.444456	1	33.4638	null	Transport (GO:0006810)
A0A0C4DGN6	GIT1	ARF GTPase-activating protein GIT1	2	3	1.91582	0.93796	1.76811	0.82221	1.09603	0.121136	0.0272663		0.44427	0.9994	1.07095	Q9Y2X7	Cell communication (GO:0007154); Signal transduction (GO:0007165)
A0A0A6YYA0	TMED7-TICAM2	Protein TMED7-TICAM2	2	4	1.91656	0.938516	1.76879	0.822766	1.09681	0.120873	0.0271955		0.44427	1	5.31915	Q9Y3B3	transport [GO:0006810]
P23634	ATP2B4	Plasma membrane calcium-transporting ATPase 4 (PMCA4) (EC 3.6.3.8) (Matrix-remodeling-associated protein 1) (Plasma membrane calcium ATPase isoform 4) (Plasma membrane calcium pump isoform 4)	5	10	1.91788	0.939512	1.77002	0.823762	1.09819	0.120405	0.0271246		0.443895	1	4.10959	null	Transport (GO:0006810)
C9J712	PFN2	Profilin	7	11	1.91791	0.939535	1.77004	0.823785	1.09822	0.120394	0.0270538		0.443895	1	34.0659	P35080	Cell growth and/or maintenance (GO:0008151)
Q5T123	SH3BGRL3	SH3 domain-binding glutamic acid-rich-like protein 3	11	17	1.91961	0.940811	1.77161	0.825061	1.1	0.119796	0.0269122		0.443895	1	46.5909	Q9H299	Biological_process unknown (GO:0000004)
A0A0D9SFR5	TBC1D24	TBC1 domain family member 24	2	2	1.93448	0.951946	1.78534	0.836196	1.11549	0.114673	0.0266289		0.430632	1	3.24484	H3BNU1 H3BQ06 H3BV07 Q9ULP9	Cell-cell signaling (GO:0007267)
P51148	RAB5C	Ras-related protein Rab-5C (L1880) (RAB5L)	7	20	1.93459	0.952031	1.78544	0.836281	1.1156	0.114634	0.0265581		0.430632	1	46.2963	null	Cell communication (GO:0007154); Signal transduction (GO:0007165)
Q13424	SNTA1	Alpha-1-syntrophin (59 kDa dystrophin-associated protein A1 acidic component 1) (Pro-TGF-alpha cytoplasmic domain-interacting protein 1) (TACIP1) (Syntrophin-1)	2	3	1.93582	0.952945	1.78657	0.837195	1.11687	0.114222	0.0264164		0.430632	1	5.34654	null	Cell communication (GO:0007154); Signal transduction (GO:0007165)
P62745	RHOB	Rho-related GTP-binding protein RhoB (Rho cDNA clone 6) (h6)	3	3	1.93631	0.95331	1.78703	0.83756	1.11738	0.114057	0.0263456		0.430632	1	11.7347	null	Cell communication (GO:0007154); Signal transduction (GO:0007165)
A0A087WYT5	RAB4A	Ras-related protein Rab-4A	2	3	1.94127	0.957003	1.79161	0.841253	1.12252	0.112404	0.0260623		0.430632	1	11.5044	P20338	Cell communication (GO:0007154); Signal transduction (GO:0007165)
Q8TF74	WIPF2	WAS/WASL-interacting protein family member 2 (WASP-interacting protein-related protein) (WIP- and CR16-homologous protein) (WIP-related protein)	3	5	1.94266	0.958036	1.79289	0.842286	1.12396	0.111945	0.0259207		0.430632	1	13.6364	null	Cell growth and/or maintenance (GO:0008151)
B1AJQ6	STX12	Syntaxin-12 (Fragment)	6	8	1.95647	0.968252	1.80563	0.852502	1.13816	0.107484	0.0255666		0.420407	1	31.6279	Q86Y82	Transport (GO:0006810)
Q08357	SLC20A2	Sodium-dependent phosphate transporter 2 (Gibbon ape leukemia virus receptor 2) (GLVR-2) (Phosphate transporter 2) (PiT-2) (Pit2) (hPit2) (Solute carrier family 20 member 2)	2	4	1.95968	0.970616	1.80859	0.854866	1.14145	0.106472	0.0254958		0.417606	1	4.60123	null	Transport (GO:0006810)
A0A0D9SFB1	DNM1	Dynamin-1	12	25	1.96221	0.972481	1.81093	0.856731	1.14405	0.105679	0.0252833		0.417606	1	13.8922	Q05193	Cell communication (GO:0007154); Signal transduction (GO:0007165)
P12036	NEFH	Neurofilament heavy polypeptide (NF-H) (200 kDa neurofilament protein) (Neurofilament triplet H protein)	25	49	1.96418	0.973924	1.81274	0.858175	1.14605	0.105068	0.0252125		0.41673	1	22.3197	null	Cell growth and/or maintenance (GO:0008151)
H7BZJ3	PDIA3	Protein disulfide-isomerase A3 (Fragment)	14	22	1.96547	0.974873	1.81393	0.859123	1.14737	0.104668	0.0251416		0.416315	1	56.0976	null	Protein metabolism (GO:0019538)
P60468	SEC61B	Protein transport protein Sec61 subunit beta	2	4	1.97084	0.97881	1.81889	0.86306	1.15285	0.103022	0.0249292		0.413259	1	11.4583	null	Transport (GO:0006810)
Q7L0J3	SV2A	Synaptic vesicle glycoprotein 2A	5	12	1.97272	0.980185	1.82063	0.864435	1.15476	0.102452	0.0247875		0.412914	1	5.66038	null	Biological_process unknown (GO:0000004)
O00483	NDUFA4	Cytochrome c oxidase subunit NDUFA4 (Complex I-MLRQ) (CI-MLRQ) (NADH-ubiquinone oxidoreductase MLRQ subunit)	1	2	1.97855	0.984445	1.82601	0.868695	1.16069	0.100702	0.0247167		0.407425	0.971	12.3457	null	Metabolism (GO:0008152); Energy pathways (GO:0006091)
A6NJA2	USP14	Ubiquitin carboxyl-terminal hydrolase 14	2	4	1.98967	0.992531	1.83627	0.876781	1.17193	0.0974458	0.0245042		0.397669	1	2.45536	P54578	Protein metabolism (GO:0019538)
O00401	WASL	Neural Wiskott-Aldrich syndrome protein (N-WASP)	4	6	1.99011	0.992848	1.83668	0.877098	1.17237	0.0973201	0.0244334		0.397669	1	6.13861	null	Cell growth and/or maintenance (GO:0008151)
Q5TAQ0	UQCC2	Ubiquinol-cytochrome-c reductase complex assembly factor 2	2	4	1.99034	0.993016	1.83689	0.877266	1.17261	0.0972534	0.0243626		0.397669	0.9996	6.93069	Q9BRT2 V5IRT4	Biological_process unknown (GO:0000004)
Q9P2W3	GNG13	Guanine nucleotide-binding protein G(I)/G(S)/G(O) subunit gamma-13	2	2	1.99284	0.994826	1.8392	0.879076	1.17512	0.0965374	0.0242918		0.397407	0.9995	10.4478	null	Cell communication (GO:0007154); Signal transduction (GO:0007165)
Q16864	ATP6V1F	V-type proton ATPase subunit F (V-ATPase subunit F) (V-ATPase 14 kDa subunit) (Vacuolar proton pump subunit F)	2	3	2.0054	1.00389	1.85079	0.888139	1.18773	0.0930149	0.0238669		0.388847	1	7.56302	null	Metabolism (GO:0008152); Energy pathways (GO:0006091)
Q3SY69	ALDH1L2	Mitochondrial 10-formyltetrahydrofolate dehydrogenase (Mitochondrial 10-FTHFDH) (mtFDH) (EC 1.5.1.6) (Aldehyde dehydrogenase family 1 member L2)	2	3	2.02679	1.01919	1.87053	0.903444	1.20902	0.0873011	0.0232295		0.375821	0.9999	3.03359	null	Biological_process unknown (GO:0000004)
P62310	LSM3	U6 snRNA-associated Sm-like protein LSm3	4	6	2.027	1.01934	1.87072	0.903594	1.20923	0.0872464	0.0231586		0.375821	1	21.5686	null	Regulation of nucleobase, nucleoside, nucleotide and nucleic acid metabolism (GO:0019219)
Q96QR8	PURB	Transcriptional activator protein Pur-beta (Purine-rich element-binding protein B)	5	11	2.03107	1.02224	1.87448	0.90649	1.21325	0.0861987	0.0229462		0.375656	1	8.97436	null	Regulation of nucleobase, nucleoside, nucleotide and nucleic acid metabolism (GO:0019219)
Q7L266	ASRGL1	Isoaspartyl peptidase/L-asparaginase (EC 3.4.19.5) (EC 3.5.1.1) (Asparaginase-like protein 1) (Beta-aspartyl-peptidase) (Isoaspartyl dipeptidase) (L-asparagine amidohydrolase) [Cleaved into: Isoaspartyl peptidase/L-asparaginase alpha chain; Isoaspartyl pe	4	7	2.03268	1.02338	1.87597	0.907633	1.21484	0.0857877	0.0228045		0.375656	1	17.2078	null	Metabolism (GO:0008152); Energy pathways (GO:0006091)
A0A0A0MRX2	DDRGK1	DDRGK domain-containing protein 1	2	4	2.03269	1.02339	1.87598	0.907641	1.21486	0.0857847	0.0227337		0.375656	1	4.36242	Q96HY6	Biological_process unknown (GO:0000004)
Q9UBB6	NCDN	Neurochondrin	2	5	2.05322	1.03789	1.89493	0.922141	1.23502	0.0807092	0.0225212		0.358369	1	1.64609	null	Biological_process unknown (GO:0000004)
A0A0U1RQQ1	CARMIL1	F-actin-uncapping protein LRRC16A (Fragment)	1	1	2.06382	1.04532	1.90471	0.92957	1.24536	0.0782049	0.0221671		0.352797	0.9352	1.71674	Q5VZK9	Cytoskeleton organisation (GO:0007010)
A6PVN3	CRAT	Carnitine O-acetyltransferase	2	4	2.06395	1.04541	1.90482	0.929656	1.24548	0.0781761	0.0220963		0.352797	1	9.31677	B7ZBP5 P43155	Metabolism (GO:0008152); Energy pathways (GO:0006091)
D6R8Y0	LIMCH1	LIM and calponin homology domains-containing protein 1 (Fragment)	2	3	2.06988	1.04955	1.9103	0.933798	1.25124	0.0768081	0.0219547		0.349298	1	12.6984	D6RD46 D6RJ93 E7EPK0 E9PDJ9 G5EA03 H0Y8P3 Q6NVB9 Q9UPQ0	Biological_process unknown (GO:0000004)
P61081	UBE2M	NEDD8-conjugating enzyme Ubc12 (EC 6.3.2.-) (NEDD8 carrier protein) (NEDD8 protein ligase) (Ubiquitin-conjugating enzyme E2 M)	2	4	2.07054	1.05	1.9109	0.934255	1.25187	0.0766583	0.021813		0.349298	1	6.01093	null	Protein metabolism (GO:0019538)
H0YCG1	SF3B2	Splicing factor 3B subunit 2 (Fragment)	9	12	2.0904	1.06378	1.92924	0.948031	1.27103	0.0722545	0.0213173		0.338948	1	28.6822	Q13435	Regulation of nucleobase, nucleoside, nucleotide and nucleic acid metabolism (GO:0019219)
Q9H444	CHMP4B	Charged multivesicular body protein 4b (Chromatin-modifying protein 4b) (CHMP4b) (SNF7 homolog associated with Alix 1) (SNF7-2) (hSnf7-2) (Vacuolar protein sorting-associated protein 32-2) (Vps32-2) (hVps32-2)	8	16	2.09392	1.06621	1.93248	0.950456	1.27441	0.0715012	0.0212465		0.336532	1	36.1607	null	Transport (GO:0006810)
A0A087WWM0	TRAPPC3	Trafficking protein particle complex subunit	2	4	2.09426	1.06644	1.9328	0.950692	1.27473	0.0714284	0.0211756		0.336532	1	5.85106	A0A087WYS5 O43617	Transport (GO:0006810)
P23515	OMG	Oligodendrocyte-myelin glycoprotein	2	7	2.09453	1.06662	1.93304	0.950873	1.27499	0.0713723	0.0211048		0.336532	1	4.09091	null	Cell communication (GO:0007154); Signal transduction (GO:0007165)
F8WA11	CLASP1	CLIP-associating protein 1	2	2	2.09497	1.06693	1.93345	0.951181	1.27541	0.0712773	0.021034		0.336532	1	1.08254	H0Y5T1 Q7Z460	Cell growth and/or maintenance (GO:0008151)
P62312	LSM6	U6 snRNA-associated Sm-like protein LSm6	3	3	2.10035	1.07063	1.93841	0.954877	1.28055	0.0701443	0.0209632		0.334607	1	31.25	null	Regulation of nucleobase, nucleoside, nucleotide and nucleic acid metabolism (GO:0019219)
H0YIZ0	SHMT2	Serine hydroxymethyltransferase, mitochondrial (Fragment)	2	2	2.10234	1.07199	1.94025	0.956244	1.28246	0.0697291	0.0208215		0.334517	0.9979	3.40909	P34897	Metabolism (GO:0008152); Energy pathways (GO:0006091)
P35241	RDX	Radixin	11	16	2.11722	1.08217	1.95399	0.96642	1.29661	0.0667013	0.0206799		0.322542	1	15.6089	null	Cell growth and/or maintenance (GO:0008151)
A6PVI0	RBM12	RNA-binding protein 12 (Fragment)	2	3	2.12182	1.0853	1.95823	0.96955	1.30096	0.065792	0.0204674		0.320468	1	8.39161	A6PVI1 Q5JX62 Q9NTZ6	Regulation of nucleobase, nucleoside, nucleotide and nucleic acid metabolism (GO:0019219)
A0A087WXN9	MTSS1L	MTSS1-like protein	12	19	2.13002	1.09087	1.9658	0.975119	1.30871	0.0641993	0.0203258		0.315852	1	20.1072	Q765P7	Biological_process unknown (GO:0000004)
O75891	ALDH1L1	Cytosolic 10-formyltetrahydrofolate dehydrogenase (10-FTHFDH) (FDH) (EC 1.5.1.6) (Aldehyde dehydrogenase family 1 member L1)	10	15	2.1484	1.10326	1.98276	0.98751	1.32594	0.0607701	0.0197592		0.306522	1	10.9756	null	Metabolism (GO:0008152); Energy pathways (GO:0006091)
C9JVY5	AKAP2	A-kinase anchor protein 2 (Fragment)	4	6	2.15128	1.1052	1.98542	0.989447	1.32864	0.0602478	0.0196176		0.306522	1	7.96915	Q9Y2D5	Cell growth and/or maintenance (GO:0008151)
B7Z9C2	NAP1L1	Nucleosome assembly protein 1-like 1 (cDNA FLJ58569, highly similar to Nucleosome assembly protein 1-like 1)	3	6	2.15401	1.10702	1.98794	0.991274	1.33118	0.0597587	0.0194051		0.306522	1	8.02292	F5H4R6 F8VUX1 F8VV59 F8VXI6 F8VY35 F8W020 F8W0J6 F8W118 F8W543 H0YH88 H0YHC3 H0YIV4 P55209	Regulation of nucleobase, nucleoside, nucleotide and nucleic acid metabolism (GO:0019219)
E9PP21	CSRP1	Cysteine and glycine-rich protein 1	6	13	2.16261	1.11277	1.99588	0.997024	1.33917	0.0582411	0.0189802		0.306522	1	33.75	P21291	Cell communication (GO:0007154); Signal transduction (GO:0007165)
P30533	LRPAP1	Alpha-2-macroglobulin receptor-associated protein (Alpha-2-MRAP) (Low density lipoprotein receptor-related protein-associated protein 1) (RAP)	8	13	2.18385	1.12687	2.01548	1.01112	1.35879	0.0546543	0.0186969		0.292318	1	16.8067	null	Protein metabolism (GO:0019538)
Q9H3H9	TCEAL2	Transcription elongation factor A protein-like 2 (TCEA-like protein 2) (Transcription elongation factor S-II protein-like 2)	3	5	2.18813	1.1297	2.01943	1.01395	1.36272	0.0539582	0.0186261		0.289692	0.9991	15.859	null	Regulation of nucleobase, nucleoside, nucleotide and nucleic acid metabolism (GO:0019219)
P02549	SPTA1	Spectrin alpha chain, erythrocytic 1 (Erythroid alpha-spectrin)	4	14	2.19237	1.13249	2.02335	1.01674	1.3666	0.0532775	0.0185552		0.287129	1	0.496073	null	Cell growth and/or maintenance (GO:0008151)
Q9Y5J6	TIMM10B	Mitochondrial import inner membrane translocase subunit Tim10 B (Fracture callus protein 1) (FxC1) (Mitochondrial import inner membrane translocase subunit Tim9 B) (TIMM10B) (Tim10b)	2	3	2.19812	1.13627	2.02865	1.02052	1.37186	0.0523674	0.0184844		0.283305	0.9999	19.4175	null	Transport (GO:0006810)
O00330	PDHX	Pyruvate dehydrogenase protein X component, mitochondrial (Dihydrolipoamide dehydrogenase-binding protein of pyruvate dehydrogenase complex) (E3-binding protein) (E3BP) (Lipoyl-containing pyruvate dehydrogenase complex component X) (proX)	7	12	2.20541	1.14105	2.03538	1.0253	1.3785	0.051237	0.0184136		0.278256	1	13.7725	null	Metabolism (GO:0008152); Energy pathways (GO:0006091)
Q9GZY8	MFF	Mitochondrial fission factor	3	5	2.21399	1.14665	2.0433	1.0309	1.38629	0.0499364	0.0181303		0.273652	1	13.4503	null	Biological_process unknown (GO:0000004)
P01860	IGHG3	Immunoglobulin heavy constant gamma 3 (HDC) (Heavy chain disease protein) (Ig gamma-3 chain C region)	2	6	2.22756	1.15546	2.05582	1.03971	1.39855	0.0479463	0.017847		0.268455	1	2.65252	null	Immune response (GO:0006955)
O76024	WFS1	Wolframin	2	2	2.22984	1.15694	2.05792	1.04119	1.4006	0.0476194	0.0177762		0.267883	1	1.57303	null	Cell communication (GO:0007154); Signal transduction (GO:0007165)
B4DE60	REEP2	Receptor expression-enhancing protein	2	4	2.2334	1.15924	2.06121	1.04349	1.40381	0.047113	0.0177054		0.266094	1	21.9626	Q9BRK0	Biological_process unknown (GO:0000004)
P22626	HNRNPA2B1	Heterogeneous nuclear ribonucleoproteins A2/B1 (hnRNP A2/B1)	23	50	2.23815	1.16231	2.0656	1.04656	1.40807	0.0464463	0.0176346		0.263382	1	45.0425	null	Regulation of nucleobase, nucleoside, nucleotide and nucleic acid metabolism (GO:0019219)
X6RLX0	ERC1	ELKS/Rab6-interacting/CAST family member 1	13	18	2.24311	1.1655	2.07017	1.04975	1.41251	0.0457615	0.0174929		0.261439	1	14.6429	null	Energy pathways (GO:0006091)
K7EN45	PIN1	Peptidyl-prolyl cis-trans isomerase (EC 5.2.1.8) (Fragment)	3	5	2.24979	1.16979	2.07633	1.05404	1.41847	0.0448536	0.0172805		0.259562	1	25.5556	Q13526	Metabolism (GO:0008152); Energy pathways (GO:0006091); Regulation of cell cycle (GO:0000074)
P00568	AK1	Adenylate kinase isoenzyme 1 (AK 1) (EC 2.7.4.3) (EC 2.7.4.6) (ATP-AMP transphosphorylase 1) (ATP:AMP phosphotransferase) (Adenylate monophosphate kinase) (Myokinase)	15	27	2.25441	1.17275	2.0806	1.057	1.42259	0.0442361	0.0171388		0.258105	1	47.9381	Q5T9B7	Metabolism (GO:0008152); Energy pathways (GO:0006091)
O60664	PLIN3	Perilipin-3 (47 kDa mannose 6-phosphate receptor-binding protein) (47 kDa MPR-binding protein) (Cargo selection protein TIP47) (Mannose-6-phosphate receptor-binding protein 1) (Placental protein 17) (PP17)	13	20	2.29599	1.19911	2.11897	1.08336	1.45926	0.0390453	0.0166431		0.234604	1	26.7281	null	Transport (GO:0006810)
K7EMT0	SF3A2	Splicing factor 3A subunit 2 (Fragment)	2	4	2.31089	1.20845	2.13272	1.0927	1.47224	0.0373364	0.0162181		0.229399	1	10.3704	Q15428	Protein metabolism (GO:0019538)
Q5VZR0	GLIPR2	Golgi-associated plant pathogenesis-related protein 1	2	4	2.31327	1.20994	2.13493	1.09419	1.47431	0.0370698	0.0161473		0.229399	1	10.1562	Q9H4G4	Biological_process unknown (GO:0000004)
I3L0A0	TMEM189-UBE2V1	HCG2044781 (TMEM189-UBE2V1 readthrough)	9	18	2.31985	1.21403	2.14099	1.09828	1.48001	0.036345	0.0160057		0.226552	1	17.2973	Q13404	Protein metabolism (GO:0019538)
K7EQG4	FXYD1	Phospholemman (Fragment)	2	3	2.33109	1.221	2.15137	1.10525	1.48971	0.035138	0.015864		0.221495	1	10.4348	O00168	Muscle contraction (GO:0006936)
I3L4N6	SLC12A4	Solute carrier family 12 member 4	3	3	2.34791	1.23138	2.1669	1.11563	1.50414	0.0334057	0.0157224		0.212472	0.9912	2.60366	null	Transport (GO:0006810)
O75129	ASTN2	Astrotactin-2	2	3	2.3489	1.23199	2.16781	1.11624	1.50498	0.0333068	0.0156516		0.212472	1	2.31516	null	Biological_process unknown (GO:0000004)
A0A0B4J1Z1	SRSF7	Serine/arginine-rich-splicing factor 7 (Splicing factor, arginine/serine-rich 7, 35kDa, isoform CRA_a)	5	5	2.35431	1.2353	2.1728	1.11955	1.50959	0.0327701	0.0155099		0.211285	1	27.7372	C9JAB2 Q16629	Regulation of nucleobase, nucleoside, nucleotide and nucleic acid metabolism (GO:0019219)
E9PB61	ALYREF	THO complex subunit 4	7	18	2.35731	1.23714	2.17556	1.12139	1.51215	0.0324761	0.0153683		0.211285	1	30.303	Q86V81	Protein metabolism (GO:0019538)
A8MRB1	S100B	Protein S100-B (S100 calcium binding protein B isoform 2)	6	75	2.36193	1.23997	2.17983	1.12422	1.51608	0.0320279	0.0152266		0.210191	1	20.2128	P04271	Cell communication (GO:0007154); Signal transduction (GO:0007165)
P47755	CAPZA2	F-actin-capping protein subunit alpha-2 (CapZ alpha-2)	6	13	2.3675	1.24336	2.18497	1.12761	1.52081	0.0314963	0.0151558		0.207817	1	21.6783	null	Cell growth and/or maintenance (GO:0008151)
O95817	BAG3	BAG family molecular chaperone regulator 3 (BAG-3) (Bcl-2-associated athanogene 3) (Bcl-2-binding protein Bis) (Docking protein CAIR-1)	7	11	2.37135	1.24571	2.18853	1.12996	1.52407	0.0311336	0.015085		0.206388	1	19.1304	null	Apoptosis (GO:0006915)
Q92558	WASF1	Wiskott-Aldrich syndrome protein family member 1 (WASP family protein member 1) (Protein WAVE-1) (Verprolin homology domain-containing protein 1)	2	2	2.38006	1.251	2.19656	1.13525	1.53142	0.0303295	0.0148017		0.204906	1	4.65116	null	Cell communication (GO:0007154); Signal transduction (GO:0007165)
O15212	PFDN6	Prefoldin subunit 6 (Protein Ke2)	4	8	2.38278	1.25265	2.19907	1.1369	1.53372	0.0300825	0.0147309		0.204214	1	13.9535	null	Protein metabolism (GO:0019538)
Q8TEA8	DTD1	D-tyrosyl-tRNA(Tyr) deacylase 1 (EC 3.1.-.-) (DNA-unwinding element-binding protein B) (DUE-B) (Histidyl-tRNA synthase-related)	3	5	2.39002	1.25702	2.20575	1.14127	1.5398	0.0294353	0.0145184		0.202745	1	14.8325	null	Metabolism (GO:0008152); Energy pathways (GO:0006091)
A6NCE7	MAP1LC3B2	Microtubule-associated proteins 1A/1B light chain 3 beta 2 (Microtubule-associated proteins 1A/1B light chain 3B-like)	6	9	2.39774	1.26168	2.21288	1.14593	1.54628	0.0287596	0.0144476		0.199061	1	36.8	H3BTL1 Q9GZQ8	Biological_process unknown (GO:0000004)
P08237	PFKM	ATP-dependent 6-phosphofructokinase, muscle type (ATP-PFK) (PFK-M) (EC 2.7.1.11) (6-phosphofructokinase type A) (Phosphofructo-1-kinase isozyme A) (PFK-A) (Phosphohexokinase)	4	5	2.40082	1.26353	2.21572	1.14778	1.54885	0.0284948	0.0143768		0.1982	1	4.61539	null	Metabolism (GO:0008152); Energy pathways (GO:0006091)
Q96C90	PPP1R14B	Protein phosphatase 1 regulatory subunit 14B (Phospholipase C-beta-3 neighbouring gene protein)	2	2	2.4023	1.26442	2.21709	1.14867	1.55009	0.0283679	0.0143059		0.1982	1	17.0068	null	Metabolism (GO:0008152); Energy pathways (GO:0006091)
P24752	ACAT1	Acetyl-CoA acetyltransferase, mitochondrial (EC 2.3.1.9) (Acetoacetyl-CoA thiolase) (T2)	4	7	2.40312	1.26491	2.21784	1.14916	1.55077	0.0282986	0.0142351		0.1982	1	9.36768	null	Metabolism (GO:0008152); Energy pathways (GO:0006091)
O14594	NCAN	Neurocan core protein (Chondroitin sulfate proteoglycan 3)	3	3	2.41163	1.27001	2.2257	1.15426	1.55787	0.0275835	0.0140935		0.195483	1	2.11961	null	Cell communication (GO:0007154); Signal transduction (GO:0007165)
P00492	HPRT1	Hypoxanthine-guanine phosphoribosyltransferase (HGPRT) (HGPRTase) (EC 2.4.2.8)	7	15	2.41736	1.27343	2.23099	1.15768	1.56263	0.0271125	0.0140227		0.193348	1	26.1468	null	Metabolism (GO:0008152); Energy pathways (GO:0006091)
P35527	KRT9	Keratin, type I cytoskeletal 9 (Cytokeratin-9) (CK-9) (Keratin-9) (K9)	2	2	2.42069	1.27542	2.23406	1.15967	1.56539	0.0268426	0.0138102		0.193348	0.9997	3.69181	null	Cell growth and/or maintenance (GO:0008151)
O75146	HIP1R	Huntingtin-interacting protein 1-related protein (HIP1-related protein) (Huntingtin-interacting protein 12) (HIP-12)	1	2	2.42112	1.27567	2.23446	1.15992	1.56575	0.0268081	0.0137394		0.193348	0.9693	1.02996	null	Cell growth and/or maintenance (GO:0008151)
G3V5Z7	PSMA6	Proteasome subunit alpha type (EC 3.4.25.1)	3	6	2.42597	1.27856	2.23893	1.16281	1.56976	0.0264204	0.0136686		0.193293	1	12.3016	P60900	Protein metabolism (GO:0019538)
O43390	HNRNPR	Heterogeneous nuclear ribonucleoprotein R (hnRNP R)	10	14	2.42671	1.279	2.23962	1.16325	1.57038	0.0263614	0.0135977		0.193293	1	16.7457	null	Regulation of nucleobase, nucleoside, nucleotide and nucleic acid metabolism (GO:0019219)
P20700	LMNB1	Lamin-B1	12	16	2.44385	1.28916	2.25544	1.17341	1.5845	0.0250376	0.0135269		0.185095	1	19.2833	null	Cell growth and/or maintenance (GO:0008151)
Q15819	UBE2V2	Ubiquitin-conjugating enzyme E2 variant 2 (DDVit 1) (Enterocyte differentiation-associated factor 1) (EDAF-1) (Enterocyte differentiation-promoting factor 1) (EDPF-1) (MMS2 homolog) (Vitamin D3-inducible protein)	8	15	2.47859	1.30952	2.28749	1.19377	1.61282	0.0225562	0.0133144		0.169412	1	43.4483	null	Protein metabolism (GO:0019538)
A0A1W2PQ51	DDX17	Probable ATP-dependent RNA helicase DDX17	2	4	2.4954	1.31927	2.30301	1.20352	1.62638	0.0214454	0.0131728		0.162801	1	1.91518	A0A1X7SBZ2 Q92841	Regulation of nucleobase, nucleoside, nucleotide and nucleic acid metabolism (GO:0019219)
E9PGT6	COPS8	COP9 signalosome complex subunit 8	3	5	2.51022	1.32781	2.31668	1.21206	1.63826	0.0205118	0.0129603		0.15744	1	20.2312	H7C3S9 Q99627	Regulation of signal transduction (GO:0009966)
Q12906	ILF3	Interleukin enhancer-binding factor 3 (Double-stranded RNA-binding protein 76) (DRBP76) (M-phase phosphoprotein 4) (MPP4) (Nuclear factor associated with dsRNA) (NFAR) (Nuclear factor of activated T-cells 90 kDa) (NF-AT-90) (Translational control protein	4	9	2.51787	1.3322	2.32375	1.21645	1.64437	0.0200456	0.0126771		0.15713	1	4.25056	null	Regulation of gene expression, epigenetic (GO:0040029)
A8MXP9	MATR3	Matrin-3	5	8	2.55422	1.35288	2.35729	1.23713	1.67313	0.0179736	0.0126062		0.142577	1	6.25698	null	Regulation of nucleobase, nucleoside, nucleotide and nucleic acid metabolism (GO:0019219)
H0Y5A1	PTGDS	Prostaglandin-H2 D-isomerase (Fragment)	2	3	2.55624	1.35402	2.35916	1.23827	1.67472	0.0178648	0.0125354		0.142514	1	18.5484	P41222 Q5SQ11	Metabolism (GO:0008152); Energy pathways (GO:0006091)
O75061	DNAJC6	Putative tyrosine-protein phosphatase auxilin (EC 3.1.3.48) (DnaJ homolog subfamily C member 6)	1	2	2.57736	1.36589	2.37865	1.25014	1.69123	0.0167679	0.0124646		0.134524	0.9617	1.31435	null	Protein metabolism (GO:0019538)
K7EML7	LSM7	U6 snRNA-associated Sm-like protein LSm7 (Fragment)	1	2	2.61844	1.38871	2.41656	1.27296	1.72296	0.0148248	0.0120397		0.123133	0.968	13.3333	K7ENY5 Q9UK45	Regulation of nucleobase, nucleoside, nucleotide and nucleic acid metabolism (GO:0019219)
B7Z2U2	TOM1L2	TOM1-like protein 2 (cDNA FLJ54050, highly similar to Homo sapiens target of myb1-like 2 (TOM1L2), transcript variant 2, mRNA)	6	9	2.64872	1.4053	2.44451	1.28955	1.74603	0.0135392	0.0119688		0.11312	1	16.1954	null	Transport (GO:0006810)
O43920	NDUFS5	NADH dehydrogenase [ubiquinone] iron-sulfur protein 5 (Complex I-15 kDa) (CI-15 kDa) (NADH-ubiquinone oxidoreductase 15 kDa subunit)	3	4	2.6511	1.40659	2.44671	1.29084	1.74783	0.0134431	0.011898		0.112986	1	17.9245	null	Metabolism (GO:0008152); Energy pathways (GO:0006091)
A0A0A0MS41	SFXN3	Sideroflexin	2	3	2.6773	1.42078	2.47088	1.30503	1.76757	0.0124293	0.0116147		0.107014	0.9999	7.47664	A0A1P0AYU5 Q9BWM7	Biological_process unknown (GO:0000004)
P14174	MIF	Macrophage migration inhibitory factor (MIF) (EC 5.3.2.1) (Glycosylation-inhibiting factor) (GIF) (L-dopachrome isomerase) (L-dopachrome tautomerase) (EC 5.3.3.12) (Phenylpyruvate tautomerase)	2	2	2.67821	1.42127	2.47172	1.30552	1.76825	0.0123956	0.0115439		0.107014	0.9999	22.6087	null	Cell communication (GO:0007154); Signal transduction (GO:0007165)
A0A087WXM8	BCAM	Basal cell adhesion molecule	2	3	2.69259	1.429	2.485	1.31325	1.779	0.0118736	0.0114731		0.103491	1	5.27211	P50895	Cell adhesion (GO:0007155)
H0Y542	BCAS1	Breast carcinoma-amplified sequence 1 (Fragment)	11	16	2.69376	1.42962	2.48608	1.31387	1.77987	0.0118322	0.0114023		0.103491	1	25.2101	null	Cell communication (GO:0007154); Signal transduction (GO:0007165)
P62714	PPP2CB	Serine/threonine-protein phosphatase 2A catalytic subunit beta isoform (PP2A-beta) (EC 3.1.3.16)	3	3	2.69379	1.42964	2.48611	1.31389	1.77989	0.0118311	0.0113314		0.103491	1	10.6796	P67775	Cell communication (GO:0007154); Signal transduction (GO:0007165)
O60506	SYNCRIP	Heterogeneous nuclear ribonucleoprotein Q (hnRNP Q) (Glycine- and tyrosine-rich RNA-binding protein) (GRY-RBP) (NS1-associated protein 1) (Synaptotagmin-binding, cytoplasmic RNA-interacting protein)	5	8	2.6979	1.43184	2.4899	1.31609	1.78295	0.0116867	0.0112606		0.103491	0.9993	7.0626	null	Regulation of nucleobase, nucleoside, nucleotide and nucleic acid metabolism (GO:0019219)
Q12955	ANK3	Ankyrin-3 (ANK-3) (Ankyrin-G)	3	3	2.70829	1.43738	2.49948	1.32163	1.79066	0.0113294	0.011119		0.101892	1	1.09664	null	Cell communication (GO:0007154); Signal transduction (GO:0007165)
O15127	SCAMP2	Secretory carrier-associated membrane protein 2 (Secretory carrier membrane protein 2)	2	3	2.71289	1.43983	2.50373	1.32408	1.79406	0.0111746	0.0109773		0.101797	1	7.59878	null	Transport (GO:0006810)
Q7Z6Z7	HUWE1	E3 ubiquitin-protein ligase HUWE1 (EC 2.3.2.26) (ARF-binding protein 1) (ARF-BP1) (HECT, UBA and WWE domain-containing protein 1) (HECT-type E3 ubiquitin transferase HUWE1) (Homologous to E6AP carboxyl terminus homologous protein 9) (HectH9) (Large struct	3	4	2.71951	1.44335	2.50984	1.3276	1.79895	0.0109558	0.0108357		0.10101	1	0.731596	null	Regulation of nucleobase, nucleoside, nucleotide and nucleic acid metabolism (GO:0019219)
Q9H6K5	PRR36	Proline-rich protein 36	9	16	2.72718	1.44741	2.51692	1.33166	1.8046	0.0107077	0.0106941		0.100128	1	6.68648	null
O00764	PDXK	Pyridoxal kinase (EC 2.7.1.35) (Pyridoxine kinase)	4	7	2.74155	1.45499	2.53019	1.33924	1.81515	0.0102578	0.0105524	*	0.097208	1	12.1795	null	Metabolism (GO:0008152); Energy pathways (GO:0006091)
Q9UI09	NDUFA12	NADH dehydrogenase [ubiquinone] 1 alpha subcomplex subunit 12 (13 kDa differentiation-associated protein) (Complex I-B17.2) (CI-B17.2) (CIB17.2) (NADH-ubiquinone oxidoreductase subunit B17.2)	3	4	2.74481	1.45671	2.53319	1.34096	1.81754	0.0101585	0.0104816	*	0.0969175	1	37.2414	null	Metabolism (GO:0008152); Energy pathways (GO:0006091)
E7EMB3	CALM2	Calmodulin-2	18	64	2.77229	1.47108	2.55856	1.35533	1.83753	0.00935886	0.0103399	*	0.0905117	1	39.7959	E7ETZ0 H0Y7A7 P0DP23 P0DP24 P0DP25	Cell communication (GO:0007154); Signal transduction (GO:0007165)
G3V2U7	ACYP1	Acylphosphatase (EC 3.6.1.7)	1	1	2.80002	1.48544	2.58415	1.36969	1.8575	0.00861664	0.0100567	*	0.0856809	0.9706	9.30233	P07311	Metabolism (GO:0008152); Energy pathways (GO:0006091)
P20916	MAG	Myelin-associated glycoprotein (Siglec-4a)	9	22	2.81351	1.49237	2.5966	1.37662	1.86714	0.0082774	0.00998584	*	0.0828914	1	13.099	null	Immune response (GO:0006955)
P37235	HPCAL1	Hippocalcin-like protein 1 (Calcium-binding protein BDR-1) (HLP2) (Visinin-like protein 3) (VILIP-3)	9	18	2.86059	1.51631	2.64004	1.40056	1.90044	0.0071962	0.00984419	*	0.073101	1	23.3161	null	Cell communication (GO:0007154); Signal transduction (GO:0007165)
P08670	VIM	Vimentin	21	40	2.87411	1.52312	2.65253	1.40737	1.9099	0.00691286	0.00977337	*	0.0707316	1	31.5451	null	Cell growth and/or maintenance (GO:0008151)
P61457	PCBD1	Pterin-4-alpha-carbinolamine dehydratase (PHS) (EC 4.2.1.96) (4-alpha-hydroxy-tetrahydropterin dehydratase) (Dimerization cofactor of hepatocyte nuclear factor 1-alpha) (DCoH) (Dimerization cofactor of HNF1) (Phenylalanine hydroxylase-stimulating protein)	4	4	2.89601	1.53407	2.67274	1.41832	1.92514	0.00647795	0.00956091	*	0.0676096	1	29.8077	null	Metabolism (GO:0008152)
Q96HS1	PGAM5	Serine/threonine-protein phosphatase PGAM5, mitochondrial (EC 3.1.3.16) (Bcl-XL-binding protein v68) (Phosphoglycerate mutase family member 5)	3	4	2.96142	1.56629	2.7331	1.45054	1.96995	0.0053374	0.00934844	*	0.057094	1	5.88235	null	Metabolism (GO:0008152); Energy pathways (GO:0006091)
Q15056	EIF4H	Eukaryotic translation initiation factor 4H (eIF-4H) (Williams-Beuren syndrome chromosomal region 1 protein)	10	18	3.03326	1.60087	2.7994	1.48512	2.01805	0.00431796	0.00913598	*	0.0472632	1	29.4355	null	Protein metabolism (GO:0019538)
O75533	SF3B1	Splicing factor 3B subunit 1 (Pre-mRNA-splicing factor SF3b 155 kDa subunit) (SF3b155) (Spliceosome-associated protein 155) (SAP 155)	4	10	3.03883	1.60351	2.80454	1.48776	2.02173	0.00424773	0.00899433	*	0.0471284	1	3.98773	null	Regulation of nucleobase, nucleoside, nucleotide and nucleic acid metabolism (GO:0019219)
P13521	SCG2	Secretogranin-2 (Chromogranin-C) (Secretogranin II) (SgII) [Cleaved into: Secretoneurin (SN); Manserin]	5	7	3.05069	1.60914	2.81549	1.49339	2.02955	0.00410194	0.00892351	*	0.0459677	1	9.72447	null	Protein metabolism (GO:0019538)
Q9GZV7	HAPLN2	Hyaluronan and proteoglycan link protein 2 (Brain link protein 1)	6	11	3.08866	1.62698	2.85053	1.51123	2.05436	0.00366889	0.00878187	*	0.0417781	1	17.0588	null	Cell growth and/or maintenance (GO:0008151)
E9PM92	C11orf58	Chromosome 11 open reading frame 58	3	4	3.10947	1.63667	2.86974	1.52092	2.06784	0.00345155	0.00871105	*	0.0396227	1	29.2994	O00193	Biological_process unknown (GO:0000004)
P13929	ENO3	Beta-enolase (EC 4.2.1.11) (2-phospho-D-glycerate hydro-lyase) (Enolase 3) (Muscle-specific enolase) (MSE) (Skeletal muscle enolase)	11	30	3.11796	1.6406	2.87757	1.52485	2.07331	0.00336672	0.00856941	*	0.0392877	1	18.4332	null	Metabolism (GO:0008152); Energy pathways (GO:0006091)
Q96I24	FUBP3	Far upstream element-binding protein 3 (FUSE-binding protein 3)	6	9	3.199	1.67762	2.95237	1.56187	2.1248	0.00265649	0.00835694	*	0.0317878	0.9999	6.46853	null	Regulation of nucleobase, nucleoside, nucleotide and nucleic acid metabolism (GO:0019219)
O00533	CHL1	Neural cell adhesion molecule L1-like protein (Close homolog of L1) [Cleaved into: Processed neural cell adhesion molecule L1-like protein]	17	28	3.25731	1.70368	3.00618	1.58793	2.16105	0.00224176	0.00807365	*	0.0277664	1	13.1623	null	Cell communication (GO:0007154); Signal transduction (GO:0007165)
A0A0X1KG78	CAPS	Calcyphosin (Calcyphosine, isoform CRA_d)	1	2	3.27342	1.7108	3.02104	1.59505	2.17094	0.00213933	0.00793201	*	0.0267911	0.9673	4.03226	K7EL21 K7ES72 Q13938	Cell communication (GO:0007154); Signal transduction (GO:0007165)
Q08170	SRSF4	Serine/arginine-rich splicing factor 4 (Pre-mRNA-splicing factor SRP75) (SRP001LB) (Splicing factor, arginine/serine-rich 4)	2	4	3.29152	1.71875	3.03775	1.603	2.18201	0.00202986	0.00786119	*	0.0258213	1	3.23887	null	Regulation of nucleobase, nucleoside, nucleotide and nucleic acid metabolism (GO:0019219)
P01034	CST3	Cystatin-C (Cystatin-3) (Gamma-trace) (Neuroendocrine basic polypeptide) (Post-gamma-globulin)	4	5	3.30419	1.72429	3.04944	1.60854	2.18972	0.00195671	0.00771955	*	0.0253475	1	30.8219	null	Protein metabolism (GO:0019538)
Q8WUD1	RAB2B	Ras-related protein Rab-2B	6	13	3.43252	1.77927	3.16788	1.66352	2.26618	0.00135129	0.00743626	*	0.0181716	1	26.3889	null	Cell communication (GO:0007154); Signal transduction (GO:0007165)
P04080	CSTB	Cystatin-B (CPI-B) (Liver thiol proteinase inhibitor) (Stefin-B)	2	3	3.52416	1.81728	3.25246	1.70153	2.31905	0.00103945	0.00729462	*	0.0142495	0.9999	12.2449	null	Protein metabolism (GO:0019538)
A0A087X117	NOMO1	Nodal modulator 1	3	4	3.57773	1.83904	3.30189	1.72329	2.34932	0.000892356	0.0072238	*	0.012353	1	2.20994	A0A0G2JN29 Q15155	Cell communication (GO:0007154); Signal transduction (GO:0007165)
Q9HAP6	LIN7B	Protein lin-7 homolog B (Lin-7B) (hLin7B) (Mammalian lin-seven protein 2) (MALS-2) (Vertebrate lin-7 homolog 2) (Veli-2) (hVeli2)	3	5	3.59066	1.84425	3.31383	1.7285	2.35656	0.000860162	0.00715297	*	0.0120252	0.9158	17.8744	null	Cell communication (GO:0007154); Signal transduction (GO:0007165)
P02462	COL4A1	Collagen alpha-1(IV) chain [Cleaved into: Arresten]	4	4	3.60248	1.84899	3.32474	1.73324	2.36315	0.000831768	0.00701133	*	0.0118632	1	3.7148	null	Cell growth and/or maintenance (GO:0008151)
Q9UEY8	ADD3	Gamma-adducin (Adducin-like protein 70)	6	11	3.62233	1.85692	3.34305	1.74117	2.37417	0.000786252	0.00694051	*	0.0113285	1	10.3399	null	Cell growth and/or maintenance (GO:0008151)
Q9UHG2	PCSK1N	ProSAAS (Proprotein convertase subtilisin/kexin type 1 inhibitor) (Proprotein convertase 1 inhibitor) (pro-SAAS) [Cleaved into: KEP; Big SAAS (b-SAAS); Little SAAS (l-SAAS) (N-proSAAS); Big PEN-LEN (b-PEN-LEN) (SAAS CT(1-49)); PEN; Little LEN (l-LEN); Big	7	13	3.67554	1.87796	3.39217	1.76221	2.40344	0.000676382	0.00686969	*	0.0098459	1	30.3846	null	Hormone metabolism (GO:0042445)
P62873	GNB1	Guanine nucleotide-binding protein G(I)/G(S)/G(T) subunit beta-1 (Transducin beta chain 1)	2	3	3.78479	1.92021	3.49299	1.80446	2.46221	0.000497513	0.00672805	*	0.00739461	0.993	8.82353	null	Cell communication (GO:0007154); Signal transduction (GO:0007165)
Q8WWM7	ATXN2L	Ataxin-2-like protein (Ataxin-2 domain protein) (Ataxin-2-related protein)	4	6	3.79096	1.92256	3.49869	1.80681	2.46548	0.000488989	0.00665722	*	0.00734524	1	3.16279	null	Biological_process unknown (GO:0000004)
Q96FQ6	S100A16	Protein S100-A16 (Aging-associated gene 13 protein) (Protein S100-F) (S100 calcium-binding protein A16)	7	14	3.82321	1.93479	3.52845	1.81904	2.48248	0.000446834	0.0065864	*	0.00678419	1	38.8349	null	Cell communication (GO:0007154); Signal transduction (GO:0007165)
P20472	PVALB	Parvalbumin alpha	8	15	3.94968	1.98174	3.64517	1.86599	2.54778	0.000314434	0.00637394	*	0.00493313	1	64.5455	null	Cell communication (GO:0007154); Signal transduction (GO:0007165)
Q14980	NUMA1	Nuclear mitotic apparatus protein 1 (Nuclear matrix protein-22) (NMP-22) (Nuclear mitotic apparatus protein) (NuMA protein) (SP-H antigen)	4	6	3.97175	1.98977	3.66554	1.87402	2.55896	0.000295837	0.00630312	*	0.00469351	1	2.55319	null	Cell growth and/or maintenance (GO:0008151)
D3YTA9	PPP3R1	Calcineurin subunit B type 1	1	2	4.01346	2.00485	3.70403	1.8891	2.57993	0.000263709	0.00623229	*	0.00423132	0.9717	10.582	F6U1T9 H7BYZ3 P63098	Cell communication (GO:0007154); Signal transduction (GO:0007165)
E7EQR4	EZR	Ezrin	8	13	4.07979	2.0285	3.76525	1.91275	2.61282	0.000219817	0.00609065	*	0.00360909	1	11.0921	P15311	Cell growth and/or maintenance (GO:0008151)
M0R0Y2	NAPA	Alpha-soluble NSF attachment protein	6	9	4.23079	2.08093	3.90461	1.96518	2.68574	0.000145743	0.00594901	*	0.00244987	1	33.2031	P54920	Transport (GO:0006810)
P20339	RAB5A	Ras-related protein Rab-5A	4	8	4.26636	2.09301	3.93744	1.97726	2.70254	0.000132388	0.00573654	*	0.0023078	1	19.0698	null	Cell communication (GO:0007154); Signal transduction (GO:0007165)
M0R366	FSD1	Fibronectin type III and SPRY domain-containing protein 1	1	1	4.35993	2.12431	4.02379	2.00856	2.74608	0.000102947	0.00566572	*	0.00181701	0.97	2.28833	Q9BTV5	Biological_process unknown (GO:0000004)
O14529	CUX2	Homeobox protein cut-like 2 (Homeobox protein cux-2)	2	2	4.48747	2.1659	4.1415	2.05015	2.80393	7.32852e-05	0.0055949	*	0.00130986	0.9985	1.2786	null	Regulation of nucleobase, nucleoside, nucleotide and nucleic acid metabolism (GO:0019219)
E7EPL9	HSD17B4	Peroxisomal multifunctional enzyme type 2	5	5	4.58449	2.19676	4.23104	2.08101	2.84685	5.67201e-05	0.00545326	*	0.00104011	0.9988	19.1983	null	Metabolism (GO:0008152); Energy pathways (GO:0006091)
Q9NVT9	ARMC1	Armadillo repeat-containing protein 1	3	5	4.5952	2.20013	4.24092	2.08438	2.85153	5.51448e-05	0.00538244	*	0.00102453	1	12.766	null	Biological_process unknown (GO:0000004)
Q9BRP8	PYM1	Partner of Y14 and mago (PYM homolog 1 exon junction complex-associated factor) (Protein wibg homolog)	2	2	4.77392	2.25517	4.40586	2.13942	2.92809	3.45868e-05	0.00524079	*	0.000659954	0.9989	12.2549	null	Biological_process unknown (GO:0000004)
A0A087X1W8	CADM1	Cell adhesion molecule 1	4	6	4.8505	2.27813	4.47654	2.16238	2.96003	2.83773e-05	0.00516997	*	0.000548886	1	14.3204	A0A0A0MTJ8 Q9BY67 X5DQS5	Cell communication (GO:0007154); Signal transduction (GO:0007165)
Q8N158	GPC2	Glypican-2 [Cleaved into: Secreted glypican-2]	2	2	4.93008	2.30161	4.54999	2.18586	2.99269	2.31318e-05	0.00502833	*	0.000460029	0.9983	2.41796	null	Biological_process unknown (GO:0000004)
O94973	AP2A2	AP-2 complex subunit alpha-2 (100 kDa coated vesicle protein C) (Adaptor protein complex AP-2 subunit alpha-2) (Adaptor-related protein complex 2 subunit alpha-2) (Alpha-adaptin C) (Alpha2-adaptin) (Clathrin assembly protein complex 2 alpha-C large chain)	3	3	5.10155	2.35094	4.70824	2.23519	3.06129	1.49574e-05	0.00488669	*	0.000306084	1	2.02343	O95782	Transport (GO:0006810)
Q9Y2W2	WBP11	WW domain-binding protein 11 (WBP-11) (Npw38-binding protein) (NpwBP) (SH3 domain-binding protein SNP70) (Splicing factor that interacts with PQBP-1 and PP1)	3	4	5.23061	2.38698	4.82734	2.27123	3.11142	1.08147e-05	0.00481586	*	0.000224563	1	5.46022	null	Regulation of nucleobase, nucleoside, nucleotide and nucleic acid metabolism (GO:0019219)
A0A1B0GWK2	KAZN	Kazrin	2	2	5.29869	2.40564	4.89017	2.28989	3.13737	9.12611e-06	0.00467422	*	0.000195243	0.9999	5.09849	Q674X7	-
A0A0B4J291	CDYL2	Chromodomain Y-like protein 2	2	4	5.40938	2.43546	4.99233	2.31971	3.17885	6.93808e-06	0.0046034	*	0.000150717	1	2.95858	Q8N8U2	Regulation of nucleobase, nucleoside, nucleotide and nucleic acid metabolism (GO:0019219)
G3V1B6	APOO	MICOS complex subunit MIC26	2	5	5.47578	2.45306	5.05361	2.33731	3.20333	5.89289e-06	0.00453258	*	0.000130012	1	22.807	H7C1U8 Q9BUR5	Biological_process unknown (GO:0000004)
Q01469	FABP5	Fatty acid-binding protein, epidermal (Epidermal-type fatty acid-binding protein) (E-FABP) (Fatty acid-binding protein 5) (Psoriasis-associated fatty acid-binding protein homolog) (PA-FABP)	6	10	5.62975	2.49307	5.19571	2.37732	3.25898	4.04823e-06	0.00439093	*	9.21953e-05	1	16.2963	null	Transport (GO:0006810)
E5KLJ5	OPA1	Dynamin-like 120 kDa protein, mitochondrial (Mitochondrial dynamin-like 120 kDa protein) (Optic atrophy 1 (Autosomal dominant), isoform CRA_g)	1	1	6.02063	2.58991	5.55645	2.47416	3.39367	1.5916e-06	0.00424929	*	3.74556e-05	0.9425	0.985222	E5KLJ6 E5KLJ9 E5KLK1 O60313	Cell communication (GO:0007154); Signal transduction (GO:0007165)
Q7Z7H5	TMED4	Transmembrane emp24 domain-containing protein 4 (Endoplasmic reticulum stress-response protein 25) (ERS25) (GMP25iso) (Putative NF-kappa-B-activating protein 156) (p24 family protein alpha-3) (p24alpha3)	2	2	6.39143	2.67614	5.89867	2.56039	3.5136	6.73052e-07	0.00417847	*	1.61076e-05	0.9625	10.1322	null	Biological_process unknown (GO:0000004)
P60953	CDC42	Cell division control protein 42 homolog (G25K GTP-binding protein)	3	16	6.41855	2.68225	5.9237	2.5665	3.5221	6.32578e-07	0.00410765	*	1.54e-05	1	16.7539	null	Cell communication (GO:0007154); Signal transduction (GO:0007165)
Q9Y6G9	DYNC1LI1	Cytoplasmic dynein 1 light intermediate chain 1 (LIC1) (Dynein light chain A) (DLC-A) (Dynein light intermediate chain 1, cytosolic)	3	4	6.86735	2.77975	6.3379	2.664	3.65771	2.30626e-07	0.00389518	*	5.92079e-06	1	11.6635	null	Cell growth and/or maintenance (GO:0008151)
Q5JY65	CRNKL1	Crooked neck-like protein 1	2	3	7.11449	2.83076	6.56598	2.71501	3.72866	1.34125e-07	0.00382436	*	3.50712e-06	0.9971	2.51196	Q9BZJ0	Regulation of nucleobase, nucleoside, nucleotide and nucleic acid metabolism (GO:0019219)
A0A0U1RQI5	SORBS1	Sorbin and SH3 domain-containing protein 1 (Fragment)	2	4	7.11698	2.83126	6.56827	2.71551	3.72936	1.33403e-07	0.00375354	*	3.50712e-06	0.9995	5.52268	null	Signal transduction (GO:0007165); Cytoskeleton organization and biogenesis (GO:0007010)
A0A087WUW5	PTBP1	Polypyrimidine tract-binding protein 1 (Fragment)	2	5	7.38336	2.88428	6.81412	2.76853	3.80309	7.51578e-08	0.0036119	*	2.08084e-06	1	23.4568	A0A0D9SF20 A0A0U1RRM4 A6NLN1 P26599	Regulation of nucleobase, nucleoside, nucleotide and nucleic acid metabolism (GO:0019219)
P11277	SPTB	Spectrin beta chain, erythrocytic (Beta-I spectrin)	3	4	7.90882	2.98346	7.29906	2.86771	3.94104	2.49705e-08	0.00347025	*	7.19557e-07	0.9842	1.68461	null	Cell growth and/or maintenance (GO:0008151)
P01876	IGHA1	Immunoglobulin heavy constant alpha 1 (Ig alpha-1 chain C region) (Ig alpha-1 chain C region BUR) (Ig alpha-1 chain C region TRO)	4	9	7.97093	2.99475	7.35639	2.879	3.95674	2.19764e-08	0.00339943	*	6.46474e-07	1	13.3144	null	immune response [GO:0006955]
J3KS31	ZNF207	BUB3-interacting and GLEBS motif-containing protein ZNF207 (Fragment)	1	1	8.25715	3.04564	7.62055	2.92989	4.02753	1.22803e-08	0.00332861	*	3.68931e-07	0.9679	3.81232	J3QRS9 O43670 X6R4W8	Transcription (GO:0006350)
E9PLA9	CAPRIN1	Caprin-1 (Fragment)	2	3	8.31221	3.05523	7.67136	2.93948	4.04087	1.09931e-08	0.00325779	*	3.37441e-07	1	12.3656	G3V153 Q14444	Transport (GO:0006810)
O14828	SCAMP3	Secretory carrier-associated membrane protein 3 (Secretory carrier membrane protein 3)	3	5	8.58865	3.10243	7.92648	2.98668	4.10651	6.34175e-09	0.00311615	*	2.03513e-07	1	15.562	null	Transport (GO:0006810)
E9PIK4	TP53I11	Tumor protein p53-inducible protein 11	4	9	9.5125	3.24982	8.77911	3.13407	4.31152	1.07804e-09	0.0029745	*	3.62426e-08	1	19.8413	E9PIN5 E9PKN9 E9PKZ4 E9PMW4 E9PMY0 E9PN66 E9PNB3 E9PPM1 E9PQ46 E9PS55 O14683 U3KQ32	Apoptosis (GO:0006915)
E9PBI2	PRKCE	Protein kinase C epsilon type	1	1	9.64724	3.27012	8.90347	3.15437	4.33974	8.39246e-10	0.00290368	*	2.89028e-08	0.9242	10.5023	Q02156	Cell communication (GO:0007154); Signal transduction (GO:0007165)
B4DWA1	BAIAP2	Brain-specific angiogenesis inhibitor 1-associated protein 2 (cDNA FLJ55181, highly similar to Brain-specific angiogenesis inhibitor1-associated protein 2)	1	2	10.0093	3.32327	9.23762	3.20752	4.41367	4.32356e-10	0.00276204	*	1.56535e-08	0.9717	5.6	I3L3C6 I3L4C2 Q9UQB8	Cell communication (GO:0007154); Signal transduction (GO:0007165)
F1T0E5	CADPS	Calcium-dependent secretion activator 1	3	7	10.3267	3.3683	9.53051	3.25255	4.47631	2.44444e-10	0.00269122	*	9.08303e-09	1	4.09226	Q9ULU8	Transport (GO:0006810)
Q15811	ITSN1	Intersectin-1 (SH3 domain-containing protein 1A) (SH3P17)	2	3	10.7283	3.42334	9.90114	3.30759	4.55286	1.20488e-10	0.00254958	*	4.72582e-09	0.9998	1.85938	null	Signal transduction (GO:0007165); Vesicle-mediated transport (GO:0016192)
K7EK33	DAZAP1	DAZ-associated protein 1	1	1	11.4166	3.51307	10.5364	3.39732	4.67765	3.7106e-11	0.00247875	*	1.49696e-09	0.9716	3.69458	K7EQ02 K7EQ55 Q96EP5	Regulation of nucleobase, nucleoside, nucleotide and nucleic acid metabolism (GO:0019219)
M0R063	SLC1A6	Amino acid transporter	3	6	11.696	3.54794	10.7942	3.43219	4.72615	2.32842e-11	0.00240793	*	9.66977e-10	1	3.49794	P48664	Transport (GO:0006810)
P05198	EIF2S1	Eukaryotic translation initiation factor 2 subunit 1 (Eukaryotic translation initiation factor 2 subunit alpha) (eIF-2-alpha) (eIF-2A) (eIF-2alpha)	1	2	12.0948	3.59631	11.1623	3.48056	4.79344	1.2106e-11	0.00233711	*	5.17989e-10	0.9716	3.80952	null	Protein metabolism (GO:0019538)
E7EUU4	EIF4G1	Eukaryotic translation initiation factor 4 gamma 1	4	4	12.5546	3.65015	11.5867	3.5344	4.86831	5.78548e-12	0.00226629	*	2.55284e-10	1	3.97436	E7EX73 E9PGM1 Q04637	Protein metabolism (GO:0019538)
H7BZD1	GLS	Glutaminase kidney isoform, mitochondrial (Fragment)	1	2	12.8485	3.68353	11.8579	3.56778	4.91474	3.64031e-12	0.00219547	*	1.6581e-10	0.9717	13.1579	O94925	Metabolism (GO:0008152); Energy pathways (GO:0006091)
Q9UL25	RAB21	Ras-related protein Rab-21	3	4	12.9187	3.69139	11.9227	3.57564	4.92567	3.26206e-12	0.00212465	*	1.53534e-10	1	19.1111	null	Cell communication (GO:0007154); Signal transduction (GO:0007165)
Q99946	PRRT1	Proline-rich transmembrane protein 1 (Dispanin subfamily D member 1) (DSPD1)	1	2	15.0215	3.90896	13.8634	3.79321	5.22828	1.42553e-13	0.001983	*	7.18873e-12	0.9717	4.90196	null	Biological_process unknown (GO:0000004)
A0A0D9SFS3	OGDH	2-oxoglutarate dehydrogenase, mitochondrial	2	2	16.3416	4.03048	15.0817	3.91473	5.3973	2.29816e-14	0.00191218	*	1.20185e-12	0.9976	2.997	E9PCR7 E9PDF2 E9PFG7 Q02218	Metabolism (GO:0008152); Energy pathways (GO:0006091)
A6NJH9	EIF1AY	Eukaryotic translation initiation factor 1A, Y-chromosomal	2	3	16.7323	4.06456	15.4422	3.94881	5.4447	1.36557e-14	0.00184136	*	7.41612e-13	1	13.3858	O14602 P47813 X6RAC9	Protein metabolism (GO:0019538)
Q9H0Q0	FAM49A	Protein FAM49A	3	4	18.0811	4.17641	16.687	4.06066	5.60027	2.33147e-15	0.00169972	*	1.37168e-13	0.9998	9.59752	null	Biological_process unknown (GO:0000004)
Q9NV96	TMEM30A	Cell cycle control protein 50A (P4-ATPase flippase complex beta subunit TMEM30A) (Transmembrane protein 30A)	3	4	19.9979	4.32178	18.4561	4.20603	5.80246	2.22045e-16	0.00155807	*	1.42512e-14	1	6.37119	null	Biological_process unknown (GO:0000004)
F8VXC8	SMARCC2	SWI/SNF complex subunit SMARCC2	2	4	21.4063	4.41996	19.7559	4.30421	5.93902	0	0.000708215	*	0	1	2.16867	Q8TAQ2	Regulation of nucleobase, nucleoside, nucleotide and nucleic acid metabolism (GO:0019219)
D6RAX7	COPS4	COP9 constitutive photomorphogenic-like protein subunit 4 isoform 2 (COP9 signalosome complex subunit 4)	1	2	23.2492	4.53911	21.4567	4.42336	6.10473	0	0.000779037	*	0	0.9599	2.38095	D6RD63 D6RFN0 Q9BT78	Protein metabolism (GO:0019538)
A0A0A0MRH6	MIA3	Melanoma inhibitory activity protein 3 (Fragment)	1	2	23.4466	4.5513	21.6389	4.43555	6.1217	0	0.000849858	*	0	0.9716	1.7734	Q5JRA6	Biological_process unknown (GO:0000004)
Q9NRR5	UBQLN4	Ubiquilin-4 (Ataxin-1 interacting ubiquitin-like protein) (A1Up) (Ataxin-1 ubiquitin-like-interacting protein A1U) (Connexin43-interacting protein of 75 kDa) (CIP75)	2	3	24.4349	4.61087	22.551	4.49512	6.20455	0	0.00092068	*	0	0.9999	10.9817	null	Protein metabolism (GO:0019538)
Q9UN86	G3BP2	Ras GTPase-activating protein-binding protein 2 (G3BP-2) (GAP SH3 domain-binding protein 2)	2	3	27.5539	4.78418	25.4296	4.66843	6.4456	0	0.000991501	*	0	0.9999	4.56431	null	Cell communication (GO:0007154); Signal transduction (GO:0007165)
Q12962	TAF10	Transcription initiation factor TFIID subunit 10 (STAF28) (Transcription initiation factor TFIID 30 kDa subunit) (TAF(II)30) (TAFII-30) (TAFII30)	1	2	30.5473	4.93297	28.1922	4.81722	6.65255	0	0.00106232	*	0	0.9717	11.4679	null	Regulation of nucleobase, nucleoside, nucleotide and nucleic acid metabolism (GO:0019219)
P51178	PLCD1	1-phosphatidylinositol 4,5-bisphosphate phosphodiesterase delta-1 (EC 3.1.4.11) (Phosphoinositide phospholipase C-delta-1) (Phospholipase C-III) (PLC-III) (Phospholipase C-delta-1) (PLC-delta-1)	3	3	36.8557	5.20382	34.0142	5.08807	7.02925	0	0.00113314	*	0	1	6.34921	null	Metabolism (GO:0008152); Energy pathways (GO:0006091)
D6RD66	WDR1	WD repeat-containing protein 1 (Fragment)	1	2	41.3473	5.36972	38.1595	5.25397	7.26	0	0.00120397	*	0	0.9655	4.08163	O75083	Biological_process unknown (GO:0000004)
D6RFH4	CYB5B	Cytochrome b5 type B	1	9	45.0455	5.49331	41.5726	5.37756	7.4319	0	0.00127479	*	0	0.9717	25.9542	H3BUX2 J3KNF8 O43169	Transport (GO:0006810)
Q8NFU3	TSTD1	Thiosulfate sulfurtransferase/rhodanese-like domain-containing protein 1	1	2	45.9812	5.52297	42.4362	5.40722	7.47315	0	0.00134561	*	0	0.9701	7.82609	R4GNF9	Biological_process unknown (GO:0000004)
Q13129	RLF	Zinc finger protein Rlf (Rearranged L-myc fusion gene protein) (Zn-15-related protein)	2	2	46.4964	5.53905	42.9116	5.4233	7.49551	0	0.00141643	*	0	0.997	1.72414	null	Regulation of nucleobase, nucleoside, nucleotide and nucleic acid metabolism (GO:0019219)
K7EQ23	NPC1	Niemann-Pick C1 protein (Fragment)	1	1	59.4173	5.89281	54.8364	5.77706	7.98755	0	0.00148725	*	0	0.945	1.95675	O15118	Cell communication (GO:0007154); Signal transduction (GO:0007165)

## Sheet: Column Heading
Column Heading	Description
Uniprot Access	Identifier number assigned by UniProt Knowledgebase (UniProtKB)
Gene Symbol	Gene symbol for the assigned protein
Protein Description	Description of the assigned protein
q_peptide_number	Number of total quantified peptides
Spectral_Counts	Total number of spectral counts matching each protein
Ratio H/L	Ratio of the intensity of heavy and light peptides for all quantified peptides
log2Ratio H/L	log2 of the ratio of the intensity of heavy and light peptides for all quantified peptides
Normalized_log2Ratio H/L	Normalized log2 of the ratio of the intensity of heavy and light peptides for all quantified peptides
Normalized_Ratio H/L	Normalized ratio of the intensity of heavy and light peptides for all quantified peptides
z score	z transformation of median values of log2 H/L for a symetric distribution
Signficance	Complementary error function for z score value
FDR-significance thresholds	False Discovery Rate significance thresholds (1% of false positive acceptance)
FDR-adjusted p-values ( q-values)	False Discovery Rate-adjusted p-values ( q-values) (1% of false positive acceptance)
Probability	Protein Prophet probability score (Trans Proteomic Pipeline v4.8.0)
Coverage	The percentage of the protein sequence covered by identified peptide
Indistinguible Proteins	Uniprot accesion number for indistinguable proteins
Biological Process	Gene Ontology term for Biological Process associated with the protein
