# Supplementary material for: Calcium-binding proteins are altered in the cerebellum in schizophrenia
Source: PLoS One. 2020 Jul 8;15(7):e0230400. doi: 10.1371/journal.pone.0230400 (PMC7343173; doi:10.1371/journal.pone.0230400)
Supplement: S2 Dataset — (XLSX) [file pone.0230400.s007.xlsx]

## Sheet: Signifficant Reg_Proteins
Supplementary data 2. Proteins significantly regulated in the cerebellum in schizophrenia, classified according to their biological function (FDR<0.1, coverage >5%)
Uniprot Access	Gene Symbol	Protein Description	q Peptide Number	Spectral Counts	Intensity Ratio 18820 Heavy/Light	Normalized Intensity Ratio 18820 Heavy/Light	Log2 Intensity Ratio 18820 Heavy/Light	Norm Log2 intensity ratio H/L	z score	Significance	FDR-significance thresholds	FDR-adjusted p-values ( q-values)	Protein Length	Probability	Coverage	Indistinguible Proteins	Biological Process	Molecular Function	Cellular Compartment
P13796	LCP1	Plastin-2 (L-plastin) (LC64P) (Lymphocyte cytosolic protein 1) (LCP-1)	2	2	0.235824	0.217642	-2.08422	-2.19997	-4.23659	2.07984e-09	0.00304533	6.8296e-08	627	0.9998	6.2201		Cell communication (GO:0007154); Signal transduction (GO:0007165)	Calcium ion binding (GO:0005509)	Cytoplasm (GO:0005737); Mitochondrion (GO:0005739)
G1AUC5	PPP1R2P3	Protein phosphatase inhibitor 2-like protein (Protein phosphatase inhibitor 2-like protein 3)	4	7	0.341736	0.315389	-1.54905	-1.6648	-3.22175	5.20761e-06	0.00446176	0.000116717	205	1	16.5854	P41236 Q6NXS1	Cell communication (GO:0007154); Signal transduction (GO:0007165)	protein phosphatase inhibitor activity [GO:0004864]
K7EID3	PRKAR1A	cAMP-dependent protein kinase type I-alpha regulatory subunit (Fragment)	2	4	0.501855	0.463163	-0.994659	-1.11041	-2.17048	0.00214404	0.00800283	0.0267911	167	0.9999	10.7784	K7EIE5 K7EJ40 K7EK41 K7EMU2 K7EMZ6 K7EPB2 P10644	Cell communication (GO:0007154); Signal transduction (GO:0007165)	Protein serine/threonine kinase activity (GO:0004674)	Cytoplasm (GO:0005737)
B5MDF5	RAN	GTP-binding nuclear protein Ran	7	13	0.566458	0.522785	-0.819959	-0.935709	-1.8392	0.00929477	0.0101983	0.0905117	233	1	29.1845	J3KQE5 P62826	Cell communication (GO:0007154); Signal transduction (GO:0007165)	GTPase activity (GO:0003924)	Nucleus (GO:0005634); Cytoplasm (GO:0005737); Mitochondrion (GO:0005739)
E7EMB3	CALM2	Calmodulin-2	18	64	2.77229	2.55856	1.47108	1.35533	1.83753	0.00935886	0.0103399	0.0905117	196	1	39.7959	E7ETZ0 H0Y7A7 P0DP23 P0DP24 P0DP25	Cell communication (GO:0007154); Signal transduction (GO:0007165)	Calcium ion binding (GO:0005509)	Cytoplasm (GO:0005737); Nucleus (GO:0005634); Plasma membrane (GO:0005886)
P37235	HPCAL1	Hippocalcin-like protein 1 (Calcium-binding protein BDR-1) (HLP2) (Visinin-like protein 3) (VILIP-3)	9	18	2.86059	2.64004	1.51631	1.40056	1.90044	0.0071962	0.00984419	0.073101	193	1	23.3161		Cell communication (GO:0007154); Signal transduction (GO:0007165)	Calcium ion binding (GO:0005509)	Cytoplasm (GO:0005737); Plasma membrane (GO:0005886)
O00533	CHL1	Neural cell adhesion molecule L1-like protein (Close homolog of L1) [Cleaved into: Processed neural cell adhesion molecule L1-like protein]	17	28	3.25731	3.00618	1.70368	1.58793	2.16105	0.00224176	0.00807365	0.0277664	1208	1	13.1623		Cell communication (GO:0007154); Signal transduction (GO:0007165)	Cell adhesion molecule activity (GO:0005194)	Plasma membrane (GO:0005886)
Q8WUD1	RAB2B	Ras-related protein Rab-2B	6	13	3.43252	3.16788	1.77927	1.66352	2.26618	0.00135129	0.00743626	0.0181716	216	1	26.3889		Cell communication (GO:0007154); Signal transduction (GO:0007165)	GTPase activity (GO:0003924)	Golgi apparatus (GO:0005794)
Q9HAP6	LIN7B	Protein lin-7 homolog B (Lin-7B) (hLin7B) (Mammalian lin-seven protein 2) (MALS-2) (Vertebrate lin-7 homolog 2) (Veli-2) (hVeli2)	3	5	3.59066	3.31383	1.84425	1.7285	2.35656	0.000860162	0.00715297	0.0120252	207	0.9158	17.8744		Cell communication (GO:0007154); Signal transduction (GO:0007165)	Receptor signaling complex scaffold activity (GO:0030159)	Plasma membrane (GO:0005886); Cytoplasm (GO:0005737)
P62873	GNB1	Guanine nucleotide-binding protein G(I)/G(S)/G(T) subunit beta-1 (Transducin beta chain 1)	2	3	3.78479	3.49299	1.92021	1.80446	2.46221	0.000497513	0.00672805	0.00739461	340	0.993	8.82353		Cell communication (GO:0007154); Signal transduction (GO:0007165)	GTPase activity (GO:0003924)	Plasma membrane (GO:0005886); Mitochondrion (GO:0005739)
Q96FQ6	S100A16	Protein S100-A16 (Aging-associated gene 13 protein) (Protein S100-F) (S100 calcium-binding protein A16)	7	14	3.82321	3.52845	1.93479	1.81904	2.48248	0.000446834	0.0065864	0.00678419	103	1	38.8349		Cell communication (GO:0007154); Signal transduction (GO:0007165)	Calcium ion binding (GO:0005509)	Nucleolus (GO:0005730)
P20472	PVALB	Parvalbumin alpha	8	15	3.94968	3.64517	1.98174	1.86599	2.54778	0.000314434	0.00637394	0.00493313	110	1	64.5455		Cell communication (GO:0007154); Signal transduction (GO:0007165)	Calcium ion binding (GO:0005509)	Cytoplasm (GO:0005737)
D3YTA9	PPP3R1	Calcineurin subunit B type 1	1	2	4.01346	3.70403	2.00485	1.8891	2.57993	0.000263709	0.00623229	0.00423132	189	0.9717	10.582	F6U1T9 H7BYZ3 P63098	Cell communication (GO:0007154); Signal transduction (GO:0007165)	Phosphatase regulator activity (GO:0019208)	Cytoplasm (GO:0005737); Nucleus (GO:0005634); Plasma membrane (GO:0005886)
P20339	RAB5A	Ras-related protein Rab-5A	4	8	4.26636	3.93744	2.09301	1.97726	2.70254	0.000132388	0.00573654	0.0023078	215	1	19.0698		Cell communication (GO:0007154); Signal transduction (GO:0007165)	GTPase activity (GO:0003924)	Plasma membrane (GO:0005886); Cytoplasm (GO:0005737); Endosome (GO:0005768); Cell projection (GO:0042995)
A0A087X1W8	CADM1	Cell adhesion molecule 1	4	6	4.8505	4.47654	2.27813	2.16238	2.96003	2.83773e-05	0.00516997	0.000548886	412	1	14.3204	A0A0A0MTJ8 Q9BY67 X5DQS5	Cell communication (GO:0007154); Signal transduction (GO:0007165)	Cell adhesion molecule activity (GO:0005194)	Plasma membrane (GO:0005886); Nucleus (GO:0005634)
P60953	CDC42	Cell division control protein 42 homolog (G25K GTP-binding protein)	3	16	6.41855	5.9237	2.68225	2.5665	3.5221	6.32578e-07	0.00410765	1.54e-05	191	1	16.7539		Cell communication (GO:0007154); Signal transduction (GO:0007165)	GTPase activity (GO:0003924)	Cell junction (GO:0030054); Cytoplasm (GO:0005737); Plasma membrane (GO:0005886); Extracellular (GO:0005576); Microtubule cytoskeleton (GO:0015630); Apical membrane (GO:0016327); Cytosol (GO:0005829); Cell projection (GO:0042995)
E9PBI2	PRKCE	Protein kinase C epsilon type	1	1	9.64724	8.90347	3.27012	3.15437	4.33974	8.39246e-10	0.00290368	2.89028e-08	219	0.9242	10.5023	Q02156	Cell communication (GO:0007154); Signal transduction (GO:0007165)	Protein serine/threonine kinase activity (GO:0004674)	Golgi apparatus (GO:0005794); Cytoplasm (GO:0005737)
B4DWA1	BAIAP2	Brain-specific angiogenesis inhibitor 1-associated protein 2 (cDNA FLJ55181, highly similar to Brain-specific angiogenesis inhibitor1-associated protein 2)	1	2	10.0093	9.23762	3.32327	3.20752	4.41367	4.32356e-10	0.00276204	1.56535e-08	375	0.9717	5.6	I3L3C6 I3L4C2 Q9UQB8	Cell communication (GO:0007154); Signal transduction (GO:0007165)	Receptor signaling complex scaffold activity (GO:0030159)	Perinuclear region (GO:0048471); Cytoplasm (GO:0005737)
Q9UL25	RAB21	Ras-related protein Rab-21	3	4	12.9187	11.9227	3.69139	3.57564	4.92567	3.26206e-12	0.00212465	1.53534e-10	225	1	19.1111		Cell communication (GO:0007154); Signal transduction (GO:0007165)	GTPase activity (GO:0003924)	Endoplasmic reticulum (GO:0005783); Cytoplasm (GO:0005737); Mitochondrion (GO:0005739)
A0A0A0MRT6	ABI1	Abl interactor 1	3	3	0.551421	0.508908	-0.858774	-0.974524	-1.9128	0.00682819	0.00970255	0.0703752	475	1	5.47368	B6VEX4 Q8IZP0	Regulation of cell growth (GO:0001558); Signal transduction (GO:0007165)	Binding (GO:0005488)	Cytosol (GO:0005829)
A0A0U1RQI5	SORBS1	Sorbin and SH3 domain-containing protein 1 (Fragment)	2	4	7.11698	6.56827	2.83126	2.71551	3.72936	1.33403e-07	0.00375354	3.50712e-06	507	0.9995	5.52268		Signal transduction (GO:0007165); Cytoskeleton organization and biogenesis (GO:0007010)	Cell adhesion molecule activity (GO:0005194)	Cell junction (GO:0030054); Actin filament (GO:0005884); Extracellular matrix (GO:0005578)
P61457	PCBD1	Pterin-4-alpha-carbinolamine dehydratase (PHS) (EC 4.2.1.96) (4-alpha-hydroxy-tetrahydropterin dehydratase) (Dimerization cofactor of hepatocyte nuclear factor 1-alpha) (DCoH) (Dimerization cofactor of HNF1) (Phenylalanine hydroxylase-stimulating protein)	4	4	2.89601	2.67274	1.53407	1.41832	1.92514	0.00647795	0.00956091	0.0676096	104	1	29.8077		Metabolism (GO:0008152)	Hydro-lyase activity (GO:0016836)	Cytoplasm (GO:0005737); Nucleus (GO:0005634)
P00387	CYB5R3	NADH-cytochrome b5 reductase 3 (B5R) (Cytochrome b5 reductase) (EC 1.6.2.2) (Diaphorase-1) [Cleaved into: NADH-cytochrome b5 reductase 3 membrane-bound form; NADH-cytochrome b5 reductase 3 soluble form]	2	3	0.43144	0.398177	-1.21277	-1.32852	-2.58407	0.000257752	0.00616147	0.00418329	301	1	10.299		Metabolism (GO:0008152); Energy pathways (GO:0006091)	Catalytic activity (GO:0003824)	Endoplasmic reticulum (GO:0005783); Mitochondrion (GO:0005739); Plasma membrane (GO:0005886); Cytoplasm (GO:0005737)
Q9UIJ7	AK3	GTP:AMP phosphotransferase AK3, mitochondrial (EC 2.7.4.10) (Adenylate kinase 3) (AK 3) (Adenylate kinase 3 alpha-like 1)	2	3	0.445452	0.411109	-1.16666	-1.28241	-2.49664	0.000414343	0.00651558	0.00635926	227	0.9998	11.4537		Metabolism (GO:0008152); Energy pathways (GO:0006091)	Catalytic activity (GO:0003824)	Mitochondrion (GO:0005739)
O95168	NDUFB4	NADH dehydrogenase [ubiquinone] 1 beta subcomplex subunit 4 (Complex I-B15) (CI-B15) (NADH-ubiquinone oxidoreductase B15 subunit)	1	2	0.468769	0.432628	-1.09305	-1.2088	-2.35706	0.000857973	0.00708215	0.0120252	129	0.9376	7.75194		Metabolism (GO:0008152); Energy pathways (GO:0006091)	Oxidoreductase activity (GO:0016491)	Integral to membrane (GO:0016021); Mitochondrion (GO:0005739)
G3V5M2	PNP	Purine nucleoside phosphorylase (Fragment)	2	3	0.487233	0.449669	-1.03732	-1.15307	-2.25137	0.00145298	0.00750708	0.0193548	221	1	6.33484	P00491	Metabolism (GO:0008152); Energy pathways (GO:0006091)	Phosphorylase activity (GO:0004645)	Cytoplasm (GO:0005737)
P15954	COX7C	Cytochrome c oxidase subunit 7C, mitochondrial (Cytochrome c oxidase polypeptide VIIc)	4	8	0.514005	0.474376	-0.960146	-1.0759	-2.10503	0.00291118	0.00842776	0.0345428	63	1	38.0952		Metabolism (GO:0008152); Energy pathways (GO:0006091)	Molecular function unknown (GO:0005554)	Mitochondrion (GO:0005739)
E5RFZ4	PLPBP	Pyridoxal phosphate-binding protein	1	3	0.539301	0.497722	-0.890839	-1.00659	-1.9736	0.00525295	0.00927762	0.0566196	74	1	21.6216	E5RG77 O94903	Metabolism (GO:0008152); Energy pathways (GO:0006091)	Racemase and epimerase activity (GO:0016854)	Cytoplasm (GO:0005737)
O00764	PDXK	Pyridoxal kinase (EC 2.7.1.35) (Pyridoxine kinase)	4	7	2.74155	2.53019	1.45499	1.33924	1.81515	0.0102578	0.0105524	0.097208	312	1	12.1795		Metabolism (GO:0008152); Energy pathways (GO:0006091)	Catalytic activity (GO:0003824)	Cytoplasm (GO:0005737)
Q9UI09	NDUFA12	NADH dehydrogenase [ubiquinone] 1 alpha subcomplex subunit 12 (13 kDa differentiation-associated protein) (Complex I-B17.2) (CI-B17.2) (CIB17.2) (NADH-ubiquinone oxidoreductase subunit B17.2)	3	4	2.74481	2.53319	1.45671	1.34096	1.81754	0.0101585	0.0104816	0.0969175	145	1	37.2414		Metabolism (GO:0008152); Energy pathways (GO:0006091)	Oxidoreductase activity (GO:0016491)	Mitochondrion (GO:0005739)
G3V2U7	ACYP1	Acylphosphatase (EC 3.6.1.7)	1	1	2.80002	2.58415	1.48544	1.36969	1.8575	0.00861664	0.0100567	0.0856809	129	0.9706	9.30233	P07311	Metabolism (GO:0008152); Energy pathways (GO:0006091)	Hydrolase activity (GO:0016787)	Cytoplasm (GO:0005737)
Q96HS1	PGAM5	Serine/threonine-protein phosphatase PGAM5, mitochondrial (EC 3.1.3.16) (Bcl-XL-binding protein v68) (Phosphoglycerate mutase family member 5)	3	4	2.96142	2.7331	1.56629	1.45054	1.96995	0.0053374	0.00934844	0.057094	289	1	5.88235		Metabolism (GO:0008152); Energy pathways (GO:0006091)	Catalytic activity (GO:0003824)	Cytosol (GO:0005829)
P13929	ENO3	Beta-enolase (EC 4.2.1.11) (2-phospho-D-glycerate hydro-lyase) (Enolase 3) (Muscle-specific enolase) (MSE) (Skeletal muscle enolase)	11	30	3.11796	2.87757	1.6406	1.52485	2.07331	0.00336672	0.00856941	0.0392877	434	1	18.4332		Metabolism (GO:0008152); Energy pathways (GO:0006091)	Catalytic activity (GO:0003824)	Extracellular (GO:0005576)
E7EPL9	HSD17B4	Peroxisomal multifunctional enzyme type 2	5	5	4.58449	4.23104	2.19676	2.08101	2.84685	5.67201e-05	0.00545326	0.00104011	474	0.9988	19.1983		Metabolism (GO:0008152); Energy pathways (GO:0006091)	Catalytic activity (GO:0003824)	Peroxisome (GO:0005777); Cytoplasm (GO:0005737); Nucleolus (GO:0005730); Mitochondrion (GO:0005739)
H7BZD1	GLS	Glutaminase kidney isoform, mitochondrial (Fragment)	1	2	12.8485	11.8579	3.68353	3.56778	4.91474	3.64031e-12	0.00219547	1.6581e-10	114	0.9717	13.1579	O94925	Metabolism (GO:0008152); Energy pathways (GO:0006091)	Deaminase activity (GO:0019239)	Mitochondrion (GO:0005739); Golgi apparatus (GO:0005794)
E9PCX7	NNT	1-phosphatidylinositol 4,5-bisphosphate phosphodiesterase delta-1 (EC 3.1.4.11) (Phosphoinositide phospholipase C-delta-1) (Phospholipase C-III) (PLC-III) (Phospholipase C-delta-1) (PLC-delta-1)	5	3	36.8557	34.0142	5.20382	5.08807	7.02925	0	0.00113314	0	756	1	5.02618	Q13423	Metabolism (GO:0008152); Energy pathways (GO:0006091)	Phospholipase activity (GO:0004620)	Plasma membrane (GO:0005886); Cytoplasm (GO:0005737)
P51178	PLCD1	NAD(P) transhydrogenase, mitochondrial	3	6	0.0731181	0.0674809	-3.77363	-3.88938	-7.44019	0	0.000424929	0	955	1	6.34921		Energy pathways (GO:0006091)	Oxidoreductase activity (GO:0016491)	Mitochondrial membrane (GO:0005740); Mitochondrion (GO:0005739)
G3V2G8	GABRA5	Gamma-aminobutyric acid receptor subunit alpha-5 (Fragment)	1	1	0.0326241	0.0301089	-4.93792	-5.05367	-9.64802	0	0.000212465	0	166	0.9282	6.62651	G3V2K2 P31644	Transport (GO:0006810)	Extracellular ligand-gated ion channel activity (GO:0005230)	Plasma membrane (GO:0005886)
Q93050	ATP6V0A1	V-type proton ATPase 116 kDa subunit a isoform 1 (V-ATPase 116 kDa isoform a1) (Clathrin-coated vesicle/synaptic vesicle proton pump 116 kDa subunit) (Vacuolar adenosine triphosphatase subunit Ac116) (Vacuolar proton pump subunit 1) (Vacuolar proton trans	5	8	0.0981418	0.0905753	-3.34899	-3.46474	-6.63496	0	0.000566572	0	837	1	6.69056		Transport (GO:0006810)	Ion channel activity (GO:0005216)	Brush border (GO:0005903); Zymogen granule (GO:0042588); Mitochondrion (GO:0005739)
A0A0A0MR02	VDAC2	Voltage-dependent anion-selective channel protein 2 (Fragment)	16	42	0.138311	0.127648	-2.85401	-2.96976	-5.69633	7.77156e-16	0.0016289	4.77106e-14	282	1	35.461	P45880	Transport (GO:0006810)	Voltage-gated ion channel activity (GO:0005244)	Mitochondrion (GO:0005739); Nucleolus (GO:0005730); Zymogen granule (GO:0042588); Extracellular (GO:0005576); Nucleus (GO:0005634); Cytoplasm (GO:0005737)
F5GYQ1	ATP6V0D1	V-type proton ATPase subunit	2	3	0.384108	0.354494	-1.38042	-1.49617	-2.90198	4.06021e-05	0.00531161	0.000764402	392	1	7.39796	J3QL14 P61421 R4GN72	Transport (GO:0006810)	ATPase activity (GO:0016887)	-
Q7LBR1	CHMP1B	Charged multivesicular body protein 1b (CHMP1.5) (Chromatin-modifying protein 1b) (CHMP1b) (Vacuolar protein sorting-associated protein 46-2) (Vps46-2) (hVps46-2)	2	3	0.414059	0.382136	-1.27209	-1.38784	-2.69657	0.000136999	0.00580737	0.00235906	199	0.9992	8.0402		Transport (GO:0006810)	Transporter activity (GO:0005215)	Endosome (GO:0005768)
P02787	TF	Serotransferrin (Transferrin) (Beta-1 metal-binding globulin) (Siderophilin)	4	6	0.487924	0.450307	-1.03527	-1.15102	-2.24749	0.00148075	0.0075779	0.0195404	698	1	5.58739		Transport (GO:0006810)	Transporter activity (GO:0005215)	Endosome (GO:0005768); Cytoplasm (GO:0005737); Plasma membrane (GO:0005886); Nucleus (GO:0005634); Endoplasmic reticulum (GO:0005783); Extracellular (GO:0005576)
Q7L1I2	SV2B	Synaptic vesicle glycoprotein 2B	2	7	0.497607	0.459242	-1.00692	-1.12267	-2.19373	0.00191954	0.00764873	0.0250962	683	1	5.7101		Transport (GO:0006810)	Auxiliary transport protein activity (GO:0015457)	Cytoplasmic vesicle (GO:0016023)
Q86UR5	RIMS1	Regulating synaptic membrane exocytosis protein 1 (Rab-3-interacting molecule 1) (RIM 1) (Rab-3-interacting protein 2)	11	13	0.499372	0.460872	-1.00181	-1.11756	-2.18404	0.00201034	0.00779037	0.0258054	1692	1	7.62411		Transport (GO:0006810)	Transporter activity (GO:0005215)	Cytoplasmic vesicle (GO:0016023)
M0R0Y2	NAPA	Alpha-soluble NSF attachment protein	6	9	4.23079	3.90461	2.08093	1.96518	2.68574	0.000145743	0.00594901	0.00244987	256	1	33.2031	P54920	Transport (GO:0006810)	Receptor signaling complex scaffold activity (GO:0030159)	Golgi apparatus (GO:0005794); Cytoplasm (GO:0005737); Lysosome (GO:0005764)
Q01469	FABP5	Fatty acid-binding protein, epidermal (Epidermal-type fatty acid-binding protein) (E-FABP) (Fatty acid-binding protein 5) (Psoriasis-associated fatty acid-binding protein homolog) (PA-FABP)	6	10	5.62975	5.19571	2.49307	2.37732	3.25898	4.04823e-06	0.00439093	9.21953e-05	135	1	16.2963		Transport (GO:0006810)	Transporter activity (GO:0005215)	Cytoplasm (GO:0005737); Endoplasmic reticulum (GO:0005783)
E9PLA9	CAPRIN1	Caprin-1 (Fragment)	2	3	8.31221	7.67136	3.05523	2.93948	4.04087	1.09931e-08	0.00325779	3.37441e-07	186	1	12.3656	G3V153 Q14444	Transport (GO:0006810)	Molecular function unknown (GO:0005554)	Plasma membrane (GO:0005886)
O14828	SCAMP3	Secretory carrier-associated membrane protein 3 (Secretory carrier membrane protein 3)	3	5	8.58865	7.92648	3.10243	2.98668	4.10651	6.34175e-09	0.00311615	2.03513e-07	347	1	15.562		Transport (GO:0006810)	Auxiliary transport protein activity (GO:0015457)	Golgi apparatus (GO:0005794); Plasma membrane (GO:0005886); Cytoplasm (GO:0005737); Early endosome (GO:0005769)
D6RFH4	CYB5B	Cytochrome b5 type B	1	9	45.0455	41.5726	5.49331	5.37756	7.4319	0	0.00127479	0	131	0.9717	25.9542	H3BUX2 J3KNF8 O43169	Transport (GO:0006810)	Transporter activity (GO:0005215)	Mitochondrion (GO:0005739)
K7N7A8		Uncharacterized protein (Fragment)	2	3	0.373892	0.345066	-1.41931	-1.53506	-2.97573	2.57284e-05	0.00509915	0.000504562	449	1	5.79065	P29972	Transport (GO:0006810)	ammonium transmembrane transporter activity [GO:0008519]; carbon dioxide transmembrane transporter activity [GO:0035379]; water channel activity [GO:0015250]
C9J2Y4	FAM136A	Protein FAM136A	1	1	0.224421	0.207118	-2.15572	-2.27147	-4.37219	6.28137e-10	0.00283286	2.21732e-08	105	0.9424	9.52381	E7EQY1 Q96C01	Regulation of nucleobase, nucleoside, nucleotide and nucleic acid metabolism (GO:0019219)	Transcription regulator activity (GO:0030528)	Nucleus (GO:0005634)
J3KPX7	PHB2	Prohibitin-2	2	2	0.519415	0.47937	-0.94504	-1.06079	-2.07638	0.0033199	0.00849858	0.0390642	298	0.9997	6.71141	Q99623	Regulation of nucleobase, nucleoside, nucleotide and nucleic acid metabolism (GO:0019219)	Transcription regulator activity (GO:0030528)	Mitochondrion (GO:0005739); Cytoplasm (GO:0005737); Nucleus (GO:0005634); Cytosol (GO:0005829)
B4DEB1	H3F3A	Histone H3	2	3	0.536096	0.494765	-0.899435	-1.01519	-1.98991	0.0048906	0.0092068	0.0531194	123	0.9985	14.6341	K7EK07 K7EMV3 K7ES00 P68431 P84243 Q16695 Q71DI3	Regulation of nucleobase, nucleoside, nucleotide and nucleic acid metabolism (GO:0019219)	DNA binding (GO:0003677)	Nucleus (GO:0005634)
Q96I24	FUBP3	Far upstream element-binding protein 3 (FUSE-binding protein 3)	6	9	3.199	2.95237	1.67762	1.56187	2.1248	0.00265649	0.00835694	0.0317878	572	0.9999	6.46853		Regulation of nucleobase, nucleoside, nucleotide and nucleic acid metabolism (GO:0019219)	Transcription factor activity (GO:0003700)	Nucleus (GO:0005634)
Q9Y2W2	WBP11	WW domain-binding protein 11 (WBP-11) (Npw38-binding protein) (NpwBP) (SH3 domain-binding protein SNP70) (Splicing factor that interacts with PQBP-1 and PP1)	3	4	5.23061	4.82734	2.38698	2.27123	3.11142	1.08147e-05	0.00481586	0.000224563	641	1	5.46022		Regulation of nucleobase, nucleoside, nucleotide and nucleic acid metabolism (GO:0019219)	RNA binding (GO:0003723)	Nucleus (GO:0005634); Integral to membrane (GO:0016021); Nucleolus (GO:0005730); Cytoplasm (GO:0005737)
A0A087WUW5	PTBP1	Polypyrimidine tract-binding protein 1 (Fragment)	2	5	7.38336	6.81412	2.88428	2.76853	3.80309	7.51578e-08	0.0036119	2.08084e-06	81	1	23.4568	A0A0D9SF20 A0A0U1RRM4 A6NLN1 P26599	Regulation of nucleobase, nucleoside, nucleotide and nucleic acid metabolism (GO:0019219)	Ribonucleoprotein (GO:0003733)	Nucleus (GO:0005634); Cytoplasm (GO:0005737); Nucleolus (GO:0005730)
Q12962	TAF10	Transcription initiation factor TFIID subunit 10 (STAF28) (Transcription initiation factor TFIID 30 kDa subunit) (TAF(II)30) (TAFII-30) (TAFII30)	1	2	30.5473	28.1922	4.93297	4.81722	6.65255	0	0.00106232	0	218	0.9717	11.4679		Regulation of nucleobase, nucleoside, nucleotide and nucleic acid metabolism (GO:0019219)	Transcription regulator activity (GO:0030528)	Nucleus (GO:0005634)
H7C4H2	SRPRB	Signal recognition particle receptor subunit beta (Fragment)	1	2	0.182528	0.168455	-2.45381	-2.56956	-4.93745	2.89757e-12	0.00205382	1.41082e-10	160	0.9704	12.5	Q9Y5M8	Protein metabolism (GO:0019538)	GTPase activity (GO:0003924)	Cytoplasm (GO:0005737); Endoplasmic reticulum (GO:0005783); Mitochondrion (GO:0005739); Nucleus (GO:0005634)
P40227	CCT6A	T-complex protein 1 subunit zeta (TCP-1-zeta) (Acute morphine dependence-related protein 2) (CCT-zeta-1) (HTR3) (Tcp20)	3	4	0.366507	0.33825	-1.44809	-1.56384	-3.03031	1.82326e-05	0.00495751	0.000367778	531	1	9.03955		Protein metabolism (GO:0019538)	Chaperone activity (GO:0003754)	Cytoplasm (GO:0005737); Microtubule (GO:0005874)
A0A087X0R6	SNX12	Sorting nexin-12	4	5	0.507668	0.468528	-0.978044	-1.09379	-2.13897	0.00248665	0.0082153	0.0302685	172	1	21.5116	Q9UMY4	Protein metabolism (GO:0019538)	Molecular function unknown (GO:0005554)	Cytoplasm (GO:0005737); Endosome (GO:0005768)
B0QYN7	UBE2I	SUMO-conjugating enzyme (EC 2.3.2.-)	2	3	0.546646	0.504501	-0.871322	-0.987072	-1.93659	0.00616716	0.00949008	0.0649853	184	0.9995	7.06522	H3BPC4 H3BQQ9 P63279	Protein metabolism (GO:0019538)	Protein binding (GO:0005515)	Nucleus (GO:0005634); Cytoplasm (GO:0005737); Nucleolus (GO:0005730); Mitochondrion (GO:0005739)
Q15056	EIF4H	Eukaryotic translation initiation factor 4H (eIF-4H) (Williams-Beuren syndrome chromosomal region 1 protein)	10	18	3.03326	2.7994	1.60087	1.48512	2.01805	0.00431796	0.00913598	0.0472632	248	1	29.4355		Protein metabolism (GO:0019538)	Translation regulator activity (GO:0045182)	Cytoplasm (GO:0005737)
P13521	SCG2	Secretogranin-2 (Chromogranin-C) (Secretogranin II) (SgII) [Cleaved into: Secretoneurin (SN); Manserin]	5	7	3.05069	2.81549	1.60914	1.49339	2.02955	0.00410194	0.00892351	0.0459677	617	1	9.72447		Protein metabolism (GO:0019538)	Molecular function unknown (GO:0005554)	Golgi apparatus (GO:0005794)
P01034	CST3	Cystatin-C (Cystatin-3) (Gamma-trace) (Neuroendocrine basic polypeptide) (Post-gamma-globulin)	4	5	3.30419	3.04944	1.72429	1.60854	2.18972	0.00195671	0.00771955	0.0253475	146	1	30.8219		Protein metabolism (GO:0019538)	Protease inhibitor activity (GO:0030414)	Extracellular (GO:0005576)
P04080	CSTB	Cystatin-B (CPI-B) (Liver thiol proteinase inhibitor) (Stefin-B)	2	3	3.52416	3.25246	1.81728	1.70153	2.31905	0.00103945	0.00729462	0.0142495	98	0.9999	12.2449		Protein metabolism (GO:0019538)	Protease inhibitor activity (GO:0030414)	Nucleus (GO:0005634); Cytoplasm (GO:0005737)
A6NJH9	EIF1AY	Eukaryotic translation initiation factor 1A, Y-chromosomal	2	3	16.7323	15.4422	4.06456	3.94881	5.4447	1.36557e-14	0.00184136	7.41612e-13	127	1	13.3858	O14602 P47813 X6RAC9	Protein metabolism (GO:0019538)	Translation regulator activity (GO:0045182)	-
Q9NRR5	UBQLN4	Ubiquilin-4 (Ataxin-1 interacting ubiquitin-like protein) (A1Up) (Ataxin-1 ubiquitin-like-interacting protein A1U) (Connexin43-interacting protein of 75 kDa) (CIP75)	2	3	24.4349	22.551	4.61087	4.49512	6.20455	0	0.00092068	0	601	0.9999	10.9817		Protein metabolism (GO:0019538)	Ubiquitin-specific protease activity (GO:0004843)	Nucleus (GO:0005634)
Q08495	DMTN	Dematin (Dematin actin-binding protein) (Erythrocyte membrane protein band 4.9)	8	16	0.252416	0.232955	-1.98612	-2.10187	-4.05058	1.01393e-08	0.00318697	3.18149e-07	405	1	17.037		Cell growth and/or maintenance (GO:0008151)	Structural molecule activity (GO:0005198)	Cytoplasm (GO:0005737); Plasma membrane (GO:0005886)
P08670	VIM	Vimentin	21	40	2.87411	2.65253	1.52312	1.40737	1.9099	0.00691286	0.00977337	0.0707316	466	1	31.5451		Cell growth and/or maintenance (GO:0008151)	Structural constituent of cytoskeleton (GO:0005200)	Intermediate filament (GO:0005882); Nucleolus (GO:0005730); Extracellular (GO:0005576); Membrane fraction (GO:0005624); Golgi apparatus (GO:0005794); Endoplasmic reticulum (GO:0005783); Nucleus (GO:0005634); Cytoskeleton (GO:0005856); Mitochondrion (GO:00
Q9GZV7	HAPLN2	Hyaluronan and proteoglycan link protein 2 (Brain link protein 1)	6	11	3.08866	2.85053	1.62698	1.51123	2.05436	0.00366889	0.00878187	0.0417781	340	1	17.0588		Cell growth and/or maintenance (GO:0008151)	Extracellular matrix structural constituent (GO:0005201)	Extracellular (GO:0005576)
Q9UEY8	ADD3	Gamma-adducin (Adducin-like protein 70)	6	11	3.62233	3.34305	1.85692	1.74117	2.37417	0.000786252	0.00694051	0.0113285	706	1	10.3399		Cell growth and/or maintenance (GO:0008151)	Cytoskeletal protein binding (GO:0008092)	Plasma membrane (GO:0005886)
E7EQR4	EZR	Ezrin	8	13	4.07979	3.76525	2.0285	1.91275	2.61282	0.000219817	0.00609065	0.00360909	586	1	11.0921	P15311	Cell growth and/or maintenance (GO:0008151)	Cytoskeletal anchoring activity (GO:0016343)	Cytoplasm (GO:0005737); Plasma membrane (GO:0005886); Mitochondrion (GO:0005739)
Q9Y6G9	DYNC1LI1	Cytoplasmic dynein 1 light intermediate chain 1 (LIC1) (Dynein light chain A) (DLC-A) (Dynein light intermediate chain 1, cytosolic)	3	4	6.86735	6.3379	2.77975	2.664	3.65771	2.30626e-07	0.00389518	5.92079e-06	523	1	11.6635		Cell growth and/or maintenance (GO:0008151)	Motor activity (GO:0003774)	Cytoplasm (GO:0005737); Cytoskeleton (GO:0005856); Endosome (GO:0005768)
P0DOY2	IGLC2	Immunoglobulin lambda constant 2 (Ig lambda chain C region Kern) (Ig lambda chain C region NIG-64) (Ig lambda chain C region SH) (Ig lambda chain C region X) (Ig lambda-2 chain C region)	3	4	0.545308	0.503266	-0.874858	-0.990608	-1.9433	0.00599158	0.00941926	0.0636099	106	1	16.0377	P0DOY3	Immune response (GO:0006955)	Antigen binding (GO:0003823)	-
P20916	MAG	Myelin-associated glycoprotein (Siglec-4a)	9	22	2.81351	2.5966	1.49237	1.37662	1.86714	0.0082774	0.00998584	0.0828914	626	1	13.099		Immune response (GO:0006955)	Cell adhesion molecule activity (GO:0005194)	Plasma membrane (GO:0005886)
P01876	IGHA1	Immunoglobulin heavy constant alpha 1 (Ig alpha-1 chain C region) (Ig alpha-1 chain C region BUR) (Ig alpha-1 chain C region TRO)	4	9	7.97093	7.35639	2.99475	2.879	3.95674	2.19764e-08	0.00339943	6.46474e-07	353	1	13.3144		immune response [GO:0006955]	antigen binding [GO:0003823]
O14495	PLPP3	Phospholipid phosphatase 3 (EC 3.1.3.4) (Lipid phosphate phosphohydrolase 3) (PAP2-beta) (Phosphatidate phosphohydrolase type 2b) (Phosphatidic acid phosphatase 2b) (PAP-2b) (PAP2b) (Vascular endothelial growth factor and type I collagen-inducible protein	3	7	0.414485	0.382529	-1.27061	-1.38636	-2.69376	0.000139221	0.00587819	0.00236844	311	1	11.8971		Lipid metabolism (GO:0006629)	Acid phosphatase activity (GO:0003993)	Plasma membrane (GO:0005886)
O00154	ACOT7	Cytosolic acyl coenzyme A thioester hydrolase (EC 3.1.2.2) (Acyl-CoA thioesterase 7) (Brain acyl-CoA hydrolase) (BACH) (CTE-IIa) (CTE-II) (Long chain acyl-CoA thioester hydrolase)	3	6	0.50832	0.46913	-0.976191	-1.09194	-2.13546	0.0025278	0.00828612	0.0305065	380	1	8.42105		Lipid metabolism (GO:0006629)	Hydrolase activity (GO:0016787)	Cytoplasm (GO:0005737); Nucleus (GO:0005634); Mitochondrion (GO:0005739)
A0A087WTL4	BCL2L13	Bcl-2-like protein 13	1	2	0.305649	0.282084	-1.71005	-1.8258	-3.52707	6.09988e-07	0.00403683	1.51106e-05	461	0.9708	5.63991	A0A087WX97 Q9BXK5	Apoptosis (GO:0006915)	Molecular function unknown (GO:0005554)	Mitochondrion (GO:0005739); Cytoplasm (GO:0005737)
E9PIK4	TP53I11	Tumor protein p53-inducible protein 11	4	9	9.5125	8.77911	3.24982	3.13407	4.31152	1.07804e-09	0.0029745	3.62426e-08	126	1	19.8413	E9PIN5 E9PKN9 E9PKZ4 E9PMW4 E9PMY0 E9PN66 E9PNB3 E9PPM1 E9PQ46 E9PS55 O14683 U3KQ32	Apoptosis (GO:0006915)	Molecular function unknown (GO:0005554)	Cytoplasm (GO:0005737); Integral to membrane (GO:0016021)
F8WAM2	CCT7	T-complex protein 1 subunit eta (Fragment)	2	4	0.354017	0.326723	-1.49811	-1.61386	-3.12516	9.88636e-06	0.00474504	0.000208351	98	1	19.3878	Q99832	Protein folding (GO:0006457)	Chaperone activity (GO:0003754)	Cytoplasm (GO:0005737); Microtubule (GO:0005874); Mitochondrion (GO:0005739)
P50135	HNMT	Histamine N-methyltransferase (HMT) (EC 2.1.1.8)	2	4	0.445412	0.411072	-1.16679	-1.28254	-2.49688	0.000413796	0.00644476	0.00635926	292	1	8.21918		Amino acid and derivative metabolism (GO:0006519)	Methyltransferase activity (GO:0008168)	Cytosol (GO:0005829)
Q9UHG2	PCSK1N	ProSAAS (Proprotein convertase subtilisin/kexin type 1 inhibitor) (Proprotein convertase 1 inhibitor) (pro-SAAS) [Cleaved into: KEP; Big SAAS (b-SAAS); Little SAAS (l-SAAS) (N-proSAAS); Big PEN-LEN (b-PEN-LEN) (SAAS CT(1-49)); PEN; Little LEN (l-LEN); Big	7	13	3.67554	3.39217	1.87796	1.76221	2.40344	0.000676382	0.00686969	0.0098459	260	1	30.3846		Hormone metabolism (GO:0042445)	Molecular function unknown (GO:0005554)	Extracellular (GO:0005576); Nucleus (GO:0005634); Cytoplasmic vesicle (GO:0016023)
G3V364	LRFN5	Leucine-rich repeat and fibronectin type-III domain-containing protein 5	2	2	0.0418435	0.0386174	-4.57885	-4.6946	-8.96713	0	0.000283286	0	466	0.9985	5.5794	G3V4N1 Q96NI6	Biological_process unknown (GO:0000004)	Molecular function unknown (GO:0005554)	Integral to membrane (GO:0016021)
A0A096LP55	UQCRHL	Cytochrome b-c1 complex subunit 6-like, mitochondrial	5	12	0.117559	0.108495	-3.08854	-3.20429	-6.14108	0	0.000637394	0	91	1	63.7363		Biological_process unknown (GO:0000004)	Molecular function unknown (GO:0005554)	-
P37802	TAGLN2	Transgelin-2 (Epididymis tissue protein Li 7e) (SM22-alpha homolog)	9	16	0.143861	0.13277	-2.79725	-2.913	-5.5887	2.66454e-15	0.00177054	1.50493e-13	199	1	25.6281		Biological_process unknown (GO:0000004)	Molecular function unknown (GO:0005554)	-
A0A0C4DGY8	ENOPH1	Enolase-phosphatase E1	1	3	0.520829	0.480675	-0.941118	-1.05687	-2.06895	0.00343423	0.00864023	0.0396227	149	0.9457	14.7651	D6RA00 Q9UHY7	Biological_process unknown (GO:0000004)	Molecular function unknown (GO:0005554)	-
A0A087X253	AP2B1	AP complex subunit beta	5	7	0.566621	0.522935	-0.819545	-0.935295	-1.83841	0.00932489	0.0102691	0.0905117	913	1	5.80504	P63010	Biological_process unknown (GO:0000004)	Molecular function unknown (GO:0005554)	Plasma membrane (GO:0005886); Mitochondrion (GO:0005739)
E9PM92	C11orf58	Chromosome 11 open reading frame 58	3	4	3.10947	2.86974	1.63667	1.52092	2.06784	0.00345155	0.00871105	0.0396227	157	1	29.2994	O00193	Biological_process unknown (GO:0000004)	Molecular function unknown (GO:0005554)	-
Q9NVT9	ARMC1	Armadillo repeat-containing protein 1	3	5	4.5952	4.24092	2.20013	2.08438	2.85153	5.51448e-05	0.00538244	0.00102453	282	1	12.766		Biological_process unknown (GO:0000004)	Molecular function unknown (GO:0005554)	-
Q9BRP8	PYM1	Partner of Y14 and mago (PYM homolog 1 exon junction complex-associated factor) (Protein wibg homolog)	2	2	4.77392	4.40586	2.25517	2.13942	2.92809	3.45868e-05	0.00524079	0.000659954	204	0.9989	12.2549		Biological_process unknown (GO:0000004)	Molecular function unknown (GO:0005554)	-
G3V1B6	APOO	MICOS complex subunit MIC26	2	5	5.47578	5.05361	2.45306	2.33731	3.20333	5.89289e-06	0.00453258	0.000130012	114	1	22.807	H7C1U8 Q9BUR5	Biological_process unknown (GO:0000004)	Molecular function unknown (GO:0005554)	Mitochondrion (GO:0005739)
Q7Z7H5	TMED4	Transmembrane emp24 domain-containing protein 4 (Endoplasmic reticulum stress-response protein 25) (ERS25) (GMP25iso) (Putative NF-kappa-B-activating protein 156) (p24 family protein alpha-3) (p24alpha3)	2	2	6.39143	5.89867	2.67614	2.56039	3.5136	6.73052e-07	0.00417847	1.61076e-05	227	0.9625	10.1322		Biological_process unknown (GO:0000004)	Molecular function unknown (GO:0005554)	-
Q9H0Q0	FAM49A	Protein FAM49A	3	4	18.0811	16.687	4.17641	4.06066	5.60027	2.33147e-15	0.00169972	1.37168e-13	323	0.9998	9.59752		Biological_process unknown (GO:0000004)	Molecular function unknown (GO:0005554)	-
Q9NV96	TMEM30A	Cell cycle control protein 50A (P4-ATPase flippase complex beta subunit TMEM30A) (Transmembrane protein 30A)	3	4	19.9979	18.4561	4.32178	4.20603	5.80246	2.22045e-16	0.00155807	1.42512e-14	361	1	6.37119		Biological_process unknown (GO:0000004)	Molecular function unknown (GO:0005554)	Integral to membrane (GO:0016021)
Q8NFU3	TSTD1	Thiosulfate sulfurtransferase/rhodanese-like domain-containing protein 1	1	2	45.9812	42.4362	5.52297	5.40722	7.47315	0	0.00134561	0	115	0.9701	7.82609	R4GNF9	Biological_process unknown (GO:0000004)	Molecular function unknown (GO:0005554)	-
D6RCK3	MOB1B	MOB kinase activator 1B (Fragment)	2	3	0.507209	0.468104	-0.979349	-1.0951	-2.14144	0.00245804	0.00814448	0.0301804	130	1	9.23077	Q7L9L4 Q9H8S9	-	-	-
A0A1B0GWK2	KAZN	Kazrin	2	2	5.29869	4.89017	2.40564	2.28989	3.13737	9.12611e-06	0.00467422	0.000195243	863	0.9999	5.09849	Q674X7	-	-	Plasma membrane (GO:0005886)

## Sheet: Columm Heading
Column Heading	Description
Uniprot Access	Identifier number assigned by UniProt Knowledgebase (UniProtKB)
Gene Symbol	Gene symbol for the assigned protein
Protein Description	Description of the assigned protein
q_peptide_number	Number of total quantified peptides
Spectral_Counts	Total number of spectral counts matching each protein
Ratio H/L	Ratio of the intensity of heavy and light peptides for all quantified peptides
log2Ratio H/L	log2 of the ratio of the intensity of heavy and light peptides for all quantified peptides
Normalized_log2Ratio H/L	Normalized log2 of the ratio of the intensity of heavy and light peptides for all quantified peptides
Normalized_Ratio H/L	Normalized ratio of the intensity of heavy and light peptides for all quantified peptides
z score	z transformation of median values of log2 H/L for a symetric distribution
Signficance	Complementary error function for z score value
FDR-significance thresholds	False Discovery Rate significance thresholds (1% of false positive acceptance)
FDR-adjusted p-values ( q-values)	False Discovery Rate-adjusted p-values ( q-values) (1% of false positive acceptance)
Protein Length	Length of the protein IPI entry (number of amino acids)
Probability	Protein Prophet probability score (Trans Proteomic Pipeline v4.8.0)
Coverage	The percentage of the protein sequence covered by identified peptide
Indistinguible Proteins	Uniprot accesion number for indistinguable proteins
Biological Process	Gene Ontology term for Biological Process associated with the protein
Molecular Function	Gene Ontology term for Molecular Function associated with the protein
Cellular Compartment	Gene Ontology term for Cellular Compartment associated with the protein
